# Supplementary material
Source: Elsevier journal article supplement (https://www.sciencedirect.com/science/article/pii/S2530064423000251)
Supplement: mmc2 [file S2530064423000251:mmc2.xlsx]

## Sheet: Table S1
Large-scale patterns of useful native plants based on a systematic review of ethnobotanical studies in Argentina
Palchetti et al.
Supplementary Table S1
List of studies included in the systematic review of ethnobotanical uses in Argentina
Reference Number	References
1	Acosta M.E., Ladio A.H., Vignale N.D. (2018) Herbolaria migrante boliviana en un contexto periurbano del Noroeste Argentino. Boletin Latinoamericano y del Caribe de Plantas Medicinales y Aromaticas 17(2): 217-237.
2	Acosta M.E., Vignale N.D., Ladio A.H. (2015) ¿Qué saben sobre plantas empleadas en medicina tradicional los niños de una escuela primaria de S.S. de Jujuy, Argentina? Gaia Scientia 9(3):90-104.
3	Aguirre M.G. (2020) Combustibles leñosos empleados en la localidad de Antofagasta de la Sierra (Catamarca, Argentina). Boletin de la Sociedad Argentina de Botanica 55(2): 311-325.
4	Arenas P., Scarpa G.F. (2007) Edible wild plants of the Chorote Indians, Gran Chaco, Argentina. Botanical Journal of the Linnean Society 153(1): 73-85.
5	Arenas P., Suárez M.E. (2007) Woods employed by Gran Chaco Indians to make fire drills. Candollea 62(1): 27-40.
6	Arias Toledo B., Battistón L. (2020) Breve reseña de las trampas y armas elaboradas con materiales vegetales y su uso por pobladores isleños de Santa Fe (Argentina). Ethnobotany Research and Applications 20(40): 1-10.
7	Arias Toledo B., Galetto L., Colantonio S. (2009) Ethnobotanical knowledge in rural communities of Cordoba (Argentina): The importance of cultural and biogeographical factors. Journal of Ethnobiology and Ethnomedicine 5(40): 1-8.
8	Arias Toledo B., Trillo C. (2014). Animales y plantas que curan: avances sobre la farmacopea natural de los pobladores del área de Laguna Mar Chiquita. Revista FCEFyN 1(2): 77-85.
9	Arias Toledo B., Trillo C., Grilli M. (2010) Uso de plantas medicinales en relación al estado de conservación del bosque en Córdoba, Argentina. Ecología austral 20(3): 235-246.
10	Arre J., Molares S., Ladio A., Kutschker A. (2015) Etnobotánica de las plantas leñateras y su circuito comercial en una ciudad de la Patagonia Argentina. Gaia Scientia 9(3): 41-48.
11	Biurrum E., Galetto L., Anton A.M., Biurrum F. (2007) Plantas silvestres comestibles utilizadas en poblaciones rurales de la Provincia de La Rioja (Argentina).
12	Bocco M.E., Vischi N., Montani N. (1997) Relevamiento de las plantas medicinales espontáneas del Departamento Río Cuarto (Córdoba, Argentina). Parodiana 10(1-2): 11-18.
13	Califano L.M. (2020) Gestión del pastoreo: Conocimientos y prácticas de manejo de las especies forrajeras en la ganadería trashumante de Iruya (Salta, Argentina). Boletin de la Sociedad Argentina de Botanica 55(3): 493-513.
14	Califano L.M., Echazú F. (2013) Etnobotánica en comunidades pastoriles: Conocimiento tradicional sobre especies tóxicas para el ganado en la cuenca del río Iruya (Salta, Argentina). Boletín de la Sociedad Argentina de Botánica 48(2): 365-375.
15	Capparelli A., Raffino R. (1997) La etnobotánica de El Shincal (Catamarca) y su importancia para la arqueología I: Recursos combustibles y madereros. Parodiana 10(1-2): 181-188.
16	Cardoso M.B., Ladio A.H., Lozada M. (2012). The use of firewood in a Mapuche community in a semi-arid region of Patagonia, Argentina. Biomass and Bioenergy 46: 155-164.
17	Cardoso M.B., Ladio A.H., Lozada M. (2013) Fuelwood consumption patterns and resilience in two rural communities of the northwest Patagonian steppe, Argentina. Journal of Arid Environments 98: 146-152.
18	Castillo L., Ladio A. (2017) Traditional veterinary solutions for herders living in limited and changing conditions: A case study of “crianceros” of Central Northern Patagonia, Argentina. Journal of Arid Environments 145: 90-101.
19	Castillo L., Rostagno C.M., Ladio A. (2020) Ethnoindicators of environmental change: local knowledge used for rangeland management among smallholders of Patagonia. Rangeland Ecology & Management 73(5): 594-606.
20	Ceballos S.J., Perea M.C. (2014) Plantas medicinales utilizadas por la comunidad indígena de Quilmes (Tucumán, Argentina). Boletin Latinoamericano y del Caribe de Plantas Medicinales y Aromaticas 13(1): 47-68.
21	Conticello L., Gandullo R., Bustamante A., Tartaglia C. (1997). El uso de plantas medicinales por la comunidad mapuche de San Martín de los Andes, Provincia de Neuquén (Argentina). Parodiana 10(1-2): 165-180.
22	Crivos M., Martínez M.R., Pochettino M.L., Remorini C., Saenz C., Sy A.S. (2004) Nature and domestic life in the Valle del Cuñapirú (Misiones, Argentina): Reflections on Mbyá-Guaraní ethnoecology. Agriculture and Human Values 21: 111-125.
23	Echenique N.G., Doumecq M.B., Pochettino M.L. (2018) Saberes botánicos en El Talar: Utilización de plantas silvestres con fines medicinales y alimenticios en el Parque Costero del Sur (Partidos de Magdalena y Punta Indio, Buenos Aires, República Argentina). Gaia Scientia 12(1): 56-80.
24	Estomba D., Ladio A., Lozada M. (2005) Plantas medicinales utilizadas por una comunidad Mapuche en las cercanías de Junín de los Andes, Neuquén. Boletin Latinoamericano y del Caribe de Plantas Medicinales y Aromaticas 4(6): 107-112.
25	Eyssartier C., Ladio A.H., Lozada M. (2011). Horticultural and gathering practices complement each other: A case study in a rural population of Northwestern Patagonia. Ecology of Food and Nutrition 50(5): 429-451.
26	Eyssartier C., Ladio A.H., Lozada M. (2013) Traditional horticultural and gathering practices in two semi-rural populations of Northwestern Patagonia. Journal of Arid Environments 97: 18-25.
27	Eyssartier C., Ladio A.H., Lozada M. (2015) Horticultural practice and germplasm conservation: a case study in a rural population of the Patagonian steppe. Food Security 7(6): 1259-1271.
28	Eyssartier C., Margutti L., Lozada M. (2017) Plant knowledge in children who inhabit diverse socio-ecological environments in northwestern Patagonia. Journal of Ethnobiology 37(1): 81-96.
29	Fernández A., Martínez G.J. (2019) Las plantas en la alimentación de pobladores rurales de los ambientes serranos de la calera (Dpto. Colón, Córdoba, Argentina). Una perspectiva etnobotánica diacrónica. Bonplandia 28(1): 43-69.
30	Filipov A. (1997) La farmacopea natural en los sistemas terapéuticos de los indígenas Pilagá. Parodiana 10(1-2): 35-74.
31	Furlan V., Pirondo A. (2020) Vínculos y relaciones intracomunitarias a través del uso de plantas protectoras: Formas de construir diversidad desde los sistemas agroforestales familiares. Ethnobotany Research and Applications 19: 1-17.
32	Furlan V., Torres C., Galetto L. (2011) Conocimiento y utilización de plantas medicianales por pobladores rurales del bosque chaqueño serrano de Córdoba (Argentina). Bonplandia 20(2): 285-307.
33	Goleniowski M.E., Bongiovanni G.A., Palacio L., Nuñez C.O., Cantero J.J. (2006) Medicinal plants from the "Sierra de Comechingones", Argentina. Journal of Ethnopharmacology 107: 324-341.
34	Grimaldi P.A., Trillo C. (2018). Prácticas y usos tradicionales de "cerco" y "monte" por los criollos de San Marcos Sierras (Córdoba, Argentina). Bonplandia 27(1): 81-97.
35	Hermann P.M., Cambi V.N., Bontti E.E., Haussaire M.F., Sánchez D.H. (2001) El uso de plantas medicinales en Bahía Blanca, Argentina (Parte II). Boletin de la Sociedad Argentina de Botanica 36(1-2): 161-170.
36	Hernández M.P., Civitella S.M., Rosato V.G. (2010) Uso medicinal popular de plantas y líquenes de la Isla Paulino, Provincia de Buenos Aires, Argentina. Boletin Latinoamericano y del Caribe de Plantas Medicinales y Aromaticas 9(4): 258-268.
37	Hernández M.P., Colares M.N., Civitella S.M. (2009) Plantas utilizadas en medicina popular en un sector del Partido de Berisso, Buenos Aires, Argentina. Boletin Latinoamericano y del Caribe de Plantas Medicinales y Aromaticas 8(5): 435-444.
38	Hernández M.P., Novoa M.C., Civitella S.M., Masson D., Oviedo A. (2013). Plantas usadas en medicina popular en la Isla Santiago, Buenos Aires, Argentina. Boletin Latinoamericano y del Caribe de Plantas Medicinales y Aromaticas 12(4): 385-399.
39	Hilgert N.I. (1999) Las plantas comestibles en un sector de las Yungas meridionales (Argentina). Anales del Jardin Botanico de Madrid 57(1): 117-138.
40	Hilgert N.I. (2000) Especies vegetales empleadas en la insalivación de hojas de "coca" (Erythroxylum coca var. coca, Erythroxylaceae). Darwiniana 38 (3-4): 241-252.
41	Hilgert N.I. (2001) Plants used in home medicine in the Zenta River basin, Northwest Argentina. Journal of Ethnopharmacology 76: 11-34.
42	Hilgert N.I., Gil G.E. (2006). Medicinal plants of the Argentine Yungas plants of the Las Yungas biosphere reserve, Northwest of Argentina, used in health care. Biodiversity and Conservation 15(8): 2565-2594.
43	Hilgert N.I., Higuera M.L., Kristensen M.J. (2010). La medicina herbolaria en el contexto urbano. estudio de caso en un barrio de la ciudad de Tandil, Argentina. Boletin Latinoamericano y del Caribe de Plantas Medicinales y Aromaticas 9(3): 177-190.
44	Hurrel J.A. (1991) Etnomedicina: Enfermedad y Adaptación en Iruya y Santa Victoria (Salta, Argentina). Revista del Museo de La Plata 4(69): 109-124.
45	Jiménez-Escobar N.D. (2021) Classifications and perceptions associated with knowledge of the firewood used in a rural community of Chaco Seco (Catamarca, Argentina). Acta Botanica Mexicana 128: e1804
46	Jiménez-Escobar N.D., Martínez G.J. (2019) Plantas que mantienen al ganado: Conocimiento campesino asociado a especies forrajeras en la Sierra de Ancasti (Catamarca, Argentina). Boletin de la Sociedad Argentina de Botanica 54(4): 617-635.
47	Keller H.A. (2007) Unidades de vegetación y recursos florísticos en una aldea Mbya Guaraní de Misiones, Argentina. Kurtziana 33(1):175-191.
48	Keller H.A. (2008) Las plantas usadas en la construcción y el acondicionamiento de las viviendas y templos guaraníes en Misiones, Argentina. Bonplandia 17(1): 65-81.
49	Keller H.A. (2010) Plantas colorantes utilizadas por los guaraníes de Misiones, Argentina. Bonplandia 19(1): 11-25.
50	Keller H.A. (2010) Plantas usadas por los guaraníes de Misiones (Argentina) para la fabricación y el acondicionamiento de instrumentos musicales. Darwiniana 48(1): 7-16.
51	Keller H.A., Clifford V., Araujo J.J. (2010) The diversity and sustainability of ornamental plants traded by guarani communities of Misiones Province, Argentina. Bonplandia 19(2): 135-146.
52	Keller H.A., Prance G.T. (2008) Plants associated with fish by Guaraníes of Misiones, Argentina. Ethnobotany 20: 1-8.
53	Keller H.A., Romero H.F. (2006) Plantas medicinales utilizadas por campesinos del área de influencia de la Reserva de Biósfera Yabotí (Misiones, Argentina). Bonplandia 15(3-4): 125-141.
54	Kujawska M., Hilgert N.I. (2014) Phytotherapy of polish migrants in Misiones, Argentina: Legacy and acquired plant species. Journal of Ethnopharmacology 153(3): 810-830.
55	Kujawska M., Łuczaj Ł. (2015) Wild edible plants used by the Polish community in Misiones, Argentina. Human Ecology 43(6): 855-869.
56	Ladio A., Lozada M. (2000) Edible wild plant use in a Mapuche community of northwestern Patagonia. Human Ecology 28(1): 53-71.
57	Ladio A., Lozada M. (2004) Patterns of use and knowledge of wild edible plants in distinct ecological environments: A case study of a Mapuche community from northwestern Patagonia. Biodiversity and Conservation 13: 1153-1173.
58	Ladio A., Lozada M., Weigandt M. (2007) Comparison of traditional wild plant knowledge between aboriginal communities inhabiting arid and forest environments in Patagonia, Argentina. Journal of Arid Environments 69(4): 695-715.
59	Ladio A., Molares S. (2013) Evaluating traditional wild edible plant knowledge among teachers of Patagonia: Patterns and prospects. Learning and Individual Differences 27: 241-249.
60	Ladio A., Rapoport E.H. (1999) El uso de plantas silvestres comestibles en una población suburbana del noroeste de la Patagonia. Parodiana 11(1-2): 49-62.
61	Lambaré D.A., Hilgert N.I., Ramos R.S. (2011) Dyeing plants and knowledge transfer in the Yungas communities of Northwest Argentina. Economic Botany 65(3): 315-328.
62	Llano C., Durán V., Gasco A., Reynals E., Zárate M.S. (2021) Traditional puesteros’ perceptions of biodiversity in semi-arid Southern Mendoza, Argentina. Journal of Arid Environments 192: 104553.
63	Lozada M., Ladio A., Weigandt M. (2006) Cultural transmission of ethnobotanical knowledge in a rural community of Northwestern Patagonia, Argentina. Economic Botany 60(4): 374-385.
64	Luján M.C., Barboza G.E., Martínez G.J. (2017). Confluencia de experiencias etnomédicas y uso de plantas medicinales en practicantes nativos del Valle de Traslasierra (Departamento San Javier), Córdoba, Argentina. Boletin de la Sociedad Argentina de Botanica 52(4): 797-825.
65	Luján M.C., Martínez G.J. (2019) Etnobotánica médica urbana y periurbana de la ciudad de Córdoba (Argentina). Boletin Latinoamericano y del Caribe de Plantas Medicinales y Aromaticas 18(2): 155-196.
66	Lupo C., Echenique M.R. (1997) Etnobotánica en la comunidad puneña de Yavi, Jujuy, Argentina. Parte I. Parodiana 10(1-2): 19-34.
67	Madaleno I.M., Montero M.C. (2012) El cultivo urbano de plantas medicinales, su comercialización y usos fitoterapéuticos en la ciudad de Río Cuarto, provincia de Córdoba, Argentina. Cuadernos Geográficos 50: 63-85.
68	Martínez Crovetto R. (1964) Estudios etnonotánicos I. Nombres de plantas y su utilidad, según los indios Tobas del este del Chaco. Bonplandia 1(4): 279-333.
69	Martínez Crovetto R. (1965) Estudios etnobotánicos II. Nombres de plantas y su utilidad, según los indios Vilelas del Chaco. Bonplandia 2(1): 1-28.
70	Martínez Crovetto R. (1967) Tintorería Toba. Bonplandia 2(5):103-105.
71	Martínez Crovetto R. (1968) Estudios etnobotánicos III. Nombres de plantas y su utilidad, según los indios araucano-pampas del Oeste de Buenos Aires (República Argentina). Etnobiológica 12: 1-24.
72	Martínez Crovetto R. (1968) Estudios etnobotánicos IV. Nombres de plantas y su utilidad, segun los indios Onas de Tierra del Fuego. Etnobiológica 3:1-20.
73	Martínez Crovetto R. (1968) La alimentación entre los indios Guaraníes de Misiones (República Argentina). Etnobiológica 4: 1-24.
74	Martínez Crovetto R. (1981) Las plantas utilizadas en medicina popular en el noroeste de Corrientes (República Argentina). Miscelanea Fund. Miguel Lillo 69:1-139
75	Martínez Crovetto R.N. (2012) Estudios etnobotánicos V. Nombres de plantas y su utilidad según los Mbya Guaraní de Misiones, Argentina. Bonplandia 21(2): 109-133.
76	Martínez Crovetto R.N. (2014) Algunos datos sobre etnobotánica Mocoví. Bonplandia 23(2): 119-131.
77	Martínez G.J. (2002) Conocimiento de la flora de interés etnobotánico entre estudiantes del Valle de Paravachasca, Córdoba (Argentina). Parodiana 12(1-2): 35-62.
78	Martínez G.J. (2010) Enfermedad y entidades anímicas del entorno natural etiologías religioso-rituales y espacio-ambientales entre los tobas del Chaco central, Argentina. AIBR Revista de Antropologia Iberoamericana 5(2): 189-221.
79	Martínez G.J. (2015) Cultural patterns of firewood use as a tool for conservation: A study of multiple perceptions in a semiarid region of Cordoba, Central Argentina. Journal of Arid Environments 121: 84-99.
80	Martínez G.J. (2020) Talabartería y tinturas de la Sierra de Ancasti, Catamarca, Argentina. Ethnobotany Research and Applications 20:1-13.
81	Martínez G.J., Audisio C., Luján M.C. (2021) Las plantas medicinales, patrimonio natural y cultural de la Reserva Hídrica Natural y Recreativa Bamba, La Calera, Córdoba, Argentina. Boletin Latinoamericano y del Caribe de Plantas Medicinales y Aromaticas 20(3): 270-302.
82	Martínez G.J., Beccaglia A.M., Llinares A. (2014) Problemática hídrico-sanitaria, percepción local y calidad de fuentes de agua en una comunidad toba (qom) del Impenetrable (Chaco, Argentina). Salud Colectiva 10(2): 225-242.
83	Martínez G.J., Jiménez-Escobar N.D. (2017) Plantas de interés veterinario en la cultura campesina de la Sierra de Ancasti (Catamarca, Argentina). Boletin Latinoamericano y del Caribe de Plantas Medicinales y Aromaticas 16(4): 329-346.
84	Martínez G.J., Luján M.C. (2011) Medicinal plants used for traditional veterinary in the Sierras de Córdoba (Argentina): An ethnobotanical comparison with human medicinal uses. Journal of Ethnobiology and Ethnomedicine 7: 23.
85	Martínez G.J., Romero C., Pen C., Villar M., Durando P. (2016) Etnobotánica participativa en escuelas rurales de la Comuna Paso Viejo (Dpto. Cruz del Eje). Bonplandia 25(2): 145-162.
86	Martínez M.R., Pochettino M.L. (2004) Microambientes y recursos vegetales terapéuticos. Conocimiento local en Molinos, Salta, Argentina. Zonas Áridas 8: 18-31.
87	Menseguez P., Galetto L., Anton A. (2007) El uso de plantas medicinales en la población campesina de El Puesto (Córdoba, Argentina). Kurtziana 33(1): 89-102.
88	Molares S., Ladio A. (2012) Mapuche perceptions and conservation of Andean Nothofagus forests and their medicinal plants: A case study from a rural community in Patagonia, Argentina. Biodiversity and Conservation 21(4): 1079-1093.
89	Molares S., Ladio A. (2014) Medicinal plants in the cultural landscape of a Mapuche-Tehuelche community in arid Argentine Patagonia: An eco-sensorial approach. Journal of Ethnobiology and Ethnomedicine 10(1): 1-14.
90	Montani M.C., Scarpa G.F. (2016) Recursos vegetales y prácticas alimentarias entre Indígenas tapiete del noreste de la provincia de Salta, Argentina. Darwiniana 4(1): 12-30.
91	Morales D.V., Molares S., Ladio A.H. (2017) Firewood resource management in different landscapes in NW Patagonia. Frontiers in Ecology and Evolution 5: 111.
92	Muiño W.A. (2010) Ethnobotanical study of the rural population of the west of the Pampa Plain (Argentina). Ethnobotany Research and Applications 8: 219-231.
93	Muiño W.A. (2011) La etnobotánica médica del área de transición pampeano cuyana. Bonplandia 20(2): 353-369.
94	Muiño W.A. (2012) Estudio etnobotánico de plantas usadas en la alimentación de los campesinos del noroeste de La Pampa Argentina. Chungara 44(3): 389-400.
95	Muiño W.A., Fernández L. (2015) Plantas, dolencias y actores sociales vinculados con la medicina tradicional de Agua Escondida y las serranías del Nevado, Mendoza (Argentina). Lilloa 52(1): 46-61.
96	Muiño W.A., Fernández L. (2019) Percepciones y conocimientos de una comunidad campesina del Sudoeste de la Pampa (Argentina). recursos forrajeros, hidrocarburos y estrategias de vida. Ethnobotany Research and Applications 18: 1-18.
97	Ochoa J., Ladio A., Lozada M. (2010) Uso de recursos herbolarios entre mapuches y criollos de la comunidad campesina de Arroyo Las Minas (Río Negro, Patagonia Argentina). Boletin Latinoamericano y del Caribe de Plantas Medicinales y Aromaticas 9(4): 269-276.
98	Palacio M.O., del Valle Carrizo E., Roic L.D. (2007) Relevamiento del uso de plantas tintóreas en localidades del Departamento Atamisqui (Santiago del Estero, República Argentina). Kurtziana 33(1): 73-78.
99	Paván M.F., Furlan V., Renny M., Monterroso I., Argüello L. (2017) Tintes naturales vegetales en el paraje El Desmonte, Reserva Cultural-Natural Cerro Colorado, Córdoba (Argentina). Bonplandia
100	Pirondo A., Michlig A., Martín S.G., Keller H.A. (2018) Constitution and characteristics of the Ibereño herbolarium: A case study within Iberá wetlands (Corrientes, Argentina). Boletin Latinoamericano y del Caribe de Plantas Medicinales y Aromaticas 17(4):394-413.
101	Pochettino M.L., Martínez M.R., Itten B., Zucaro M. (1997). Las plantas medicinales como recurso terapéutico en una población urbana: estudio etnobotánico en Hernández (Pdo. La Plata, Prov. Buenos Aires, Argentina). Parodiana 10(1-2): 141-152.
102	Riat P. (2016) Pequeños recorridos, grandes saberes: el conocimiento ecológico local compartido por niños y adolescentes en una escuela rural de Santiago del Estero, Argentina. Bonplandia 25(2): 87-102.
103	Riat P., Pochettino M.L. (2013) ¿Para usar o para eliminar? El uso local del Monte Santiagueño (Argentina) y el avance de la agricultura industrial. Zonas Áridas 15(1): 68-91.
104	Richeri M., Ladio A.H., Beeskow A. (2013) Conocimiento tradicional y autosuficiencia: la herbolaria rural en la Meseta Central del Chubut (Argentina). Boletin Latinoamericano y del Caribe de Plantas Medicinales y Aromaticas 12(1): 44-58.
105	Roger E. (2020) Conocimiento ecológico aSociado a laS PrácticaS SilvoPaStorileS en la región Chaqueña Semiárida (Santiago del Estero, Argentina). Boletin de la Sociedad Argentina de Botanica 55(4): 661-679.
106	Rosso C.N., Scarpa G.F. (2017) Etnobotánica de la alimentación entre los indígenas moqoit actuales de la provincia del Chaco (Argentina) y comparacion con fuentes históricas de los siglos XVIII y XX. Boletin de la Sociedad Argentina de Botanica 52(4): 827-840.
107	Rosso C.N., Scarpa G.F. (2019) Etnobotánica médica moqoit y su comparación con grupos criollos del Chaco Argentino. Boletin de la Sociedad Argentina de Botanica 54(4): 637-662.
108	Saur Palmieri V., Geisa M.G. (2019) Las plantas comestibles empleadas por las comunidades comechingonas de San Marcos Sierras (Córdoba, Argentina). Primeras aproximaciones. Boletin de la Sociedad Argentina de Botanica 54(2): 295-309.
109	Scarpa G.F. (2000) Plants employed in traditional veterinary medicine by the criollos of the Northwestern Argentine Chaco. Darwiniana 38(3-4): 253-265.
110	Scarpa G.F. (2004) Medicinal plants used by the Criollos of Northwestern Argentine Chaco. Journal of Ethnopharmacology 91: 115-135.
111	Scarpa G.F. (2007) Etnobotánica de los Criollos del oeste de Formosa: Conocimiento tradicional, valoración y manejo de las plantas forrajeras. Kurtziana 33(1): 153-174.
112	Scarpa G.F. (2007) Plantas asociadas a la pesca y a sus recursos por los Indígenas Chorote del Chaco Semiarido (Argentina). Boletin de la Sociedad Argentina de Botanica 41(3-4): 333-345.
113	Scarpa G.F. (2009) Etnobotánica médica de los indígenas Chorote y su comparación con la de los Criollos del Chaco semiárido (Argentina). Darwiniana 47(1): 92-107.
114	Scarpa G.F. (2019) Plantas para “volar”, “enfermar” o “transformarse”: etnobotánica del chamanismo chorote. Avá 34:101-130.
115	Scarpa G.F., Rosso C.N., Anconatani L.M. (2020) Etnobotánica Aonik’enk (Tehuelches de Santa Cruz) inédita de Raúl Martínez Crovetto (II) y compilacion de fuentes secundarias: usos y prácticas asociadas a las plantas. Darwiniana 8(1): 5-22.
116	Simoni A.A., Perea M.C. (2016) Las plantas que curan: el lugar que ocupan las plantas medicinales desde la cosmovisión de los escolares de la Comunidad India Quilmes (Tucumán-Argentina). Mundo de antes 10:143-172.
117	Stampella P.C., Doumecq M.B., Vojkovic M., Laborda L. (2016) Assessment of environmental change according to "junqueros" and "leñateros" in the southern sector of the Río de la Plata region (Argentina). Bonplandia 25(1): 17-31.
118	Steibel P.E. (1997) Nombres y usos de las plantas aplicados por los Indios Ranqueles de La Pampa (Argentina). Revista de la Facultad de Agronomía, La Plata 9(2): 1-40.
119	Suárez M.E. (2018) Medicines in the forest: Ethnobotany of wild medicinal plants in the pharmacopeia of the Wichí people of Salta province (Argentina). Journal of Ethnopharmacology 231: 525-544.
120	Suárez M.E., Arenas P. (2012) Plantas y hongos tintóreos de los wichís del gran chaco. Boletin de la Sociedad Argentina de Botanica 47 (1-2): 275-283.
121	Toledo C., Kutschker A. (2012) Plantas Medicinales en el Parque Nacional Los Alerces, Chubut, Patagonia Argentina. Boletin de la Sociedad Argentina de Botanica 47(3-4): 461-470.
122	Trillo C., Arias Toledo B., Galetto L., Colantonio S. (2010). Persistence of the Use of Medicinal Plants in Rural Communities of the Western Arid Chaco [Córdoba, Argentina]. Open Complementary Medicine Journal 6: 80-89.
123	Trillo C., Audisio C. (2018) Las plantas medicinales de los huertos de pobladores de diferente tradición cultural en Bosques Chaqueños de Córdoba, Argentina. Boletin Latinoamericano y del Caribe de Plantas Medicinales y Aromaticas 17(2): 104-119.
124	Trillo C., Colantonio S., Galetto L. (2014) Perceptions and use of native forests in the arid Chaco of Córdoba, Argentina. Ethnobotany Research and Applications 12: 497-510.

## Sheet: Tabla S2
Large-scale patterns of useful native plants based on a systematic review of ethnobotanical studies in Argentina
Palchetti et al.
Supplementary Table S2
Database of useful native species based on ethnobotanical studies across Argentina
Endemic species are marked with (✤). Due to the complex taxonomic history of some species of the genera Celtis and Schinus, we decided to group the species Celtis tala and Celtis pallida into the “Celtis group”, and Schinus areira and Schinus molle into the “Schinus group”.
Family	Species	Vernacular names (in Spanish)	Use categories												Reference numbers (Details in Table S1)
			Food	Food Additives	Animal Food	Bee Plants	Invertebrate Food	Materials	Fuels	Social Uses	Vertebrate Poisons	Non-Vertebrate Poisons	Medicines	Environmental Uses
Acanthaceae	Dicliptera squarrosa Nees													1	34
Acanthaceae	Justicia brasiliana Roth												1		47
Acanthaceae	Justicia comata (L.) Lam.	Mosko yuyo			1								1		68, 111
Acanthaceae	Justicia squarrosa Griseb.	Alfilla			1										105
Acanthaceae	Justicia tweediana (Nees) Griseb.	Alfa de monte, Sacha alfa, Viscol			1								1		20, 105
Acanthaceae	Justicia xylosteoides Griseb.	Viscol											1		20
Acanthaceae	Poikilacanthus glandulosus (Nees) Ariza												1		75
Acanthaceae	Ruellia angustiflora (Nees) Lindau ex Rambo							1							47
Acanthaceae	Ruellia ciliatiflora Hook.	Toya yuyo, Reventador			1										105, 111
Acanthaceae	Ruellia filicalyx Lindau	Calajchín de las islas			1										111
Acanthaceae	Ruellia hygrophila Mart.	Reventador			1								1		30, 105, 107, 110, 111, 119
Acanthaceae	Ruellia macrosolen Lillo ex C.Ezcurra	Ucho blanco			1										105
Acanthaceae	Ruellia simplex C.Wright	Reventador, Ucho			1										105, 111
Achatocarpaceae	Achatocarpus praecox Griseb.	Palo tinta, Tala amarilla, Tala blanca			1			1	1		1		1		5, 30, 47, 76, 105, 111, 112, 113, 119
Alismataceae	Echinodorus paniculatus Micheli emend. Rataj				1										111
Alismataceae	Hydrocleys nymphoides (Willd.) Buchenau				1										111
Alstroemeriaceae	Alstroemeria aurea Graham	Amancay, Cascabel, Liuto	1										1	1	21, 25, 58
Alstroemeriaceae	Alstroemeria patagonica Phil.	Amancay, Chaquil, Liuto	1										1	1	28, 56, 57, 58, 115
Amaranthaceae	Allenrolfea vaginata (Griseb.) Kuntze	Jume, Jume negro, Jumi		1	1			1	1						98, 102, 103, 118
Amaranthaceae	Alternanthera brasiliana (L.) Kuntze	Penicilina											1		53, 54
Amaranthaceae	Alternanthera paronychioides A.St.-Hil.	Mosco yuyo blanco			1								1		74, 111
Amaranthaceae	Alternanthera philoxeroides (Mart.) Griseb.	Moco moco								1					40
Amaranthaceae	Alternanthera pungens Kunth	Ashpaquishka, Chucuchucu, Hierba del pollo, Yerba de pollo, Yerba del pollo, Yerba del pollo macho			1					1			1		1, 9, 12, 20, 23, 30, 32, 35, 43, 54, 64, 65, 67, 69, 71, 74, 76, 81, 85, 87, 100, 101, 103, 105, 107, 110, 113, 114, 118, 122, 123, 124
Amaranthaceae	Amaranthus cf. spinosus L.	Ataco			1										46
Amaranthaceae	Amaranthus muricatus (Moq.) Hieron.	Arenaria, Mea mea, Meona, Poleo de la tierra, Yerba meona											1		30, 65, 67, 68, 74, 76, 85, 87, 103, 107, 110
Amaranthaceae	Amaranthus standleyanus Parodi ex Covas	Ataco	1		1					1			1		11, 111, 114, 119
Amaranthaceae	Amaranthus viridis L.	Ataco		1	1					1			1		47, 74, 75, 105, 109, 110, 111
Amaranthaceae	Atriplex argentina Speg.	Zampita						1							118
Amaranthaceae	Atriplex lampa (Moq.) D.Dietr.✤	Cachiyuyo, Sampa, Zampa, Zampa cresta		1	1			1	1				1		16, 18, 20, 57, 91, 92, 96, 104, 118
Amaranthaceae	Atriplex montevidensis Spreng.	Cachiyuyo											1		65
Amaranthaceae	Atriplex patagonica (Moq.) D.Dietr.	Zampita						1							118
Amaranthaceae	Atriplex undulata (Moq.) D.Dietr.	Cachiyuyo, Zamba blanca, Zampa crespa, Zampa cresta			1			1		1			1		8, 96, 118, 122, 124
Amaranthaceae	Chamissoa altissima (Jacq.) Kunth	Sacha								1					40
Amaranthaceae	Chenopodium hircinum Schrad.	Yuyo blanco							1				1		62, 71, 74
Amaranthaceae	Chenopodium quinoa Willd.	Ajara, Quinoa, Quínoa, Quinua, Quiuna, Quiúna	1							1			1		1, 39, 40, 42, 43, 64, 65, 66, 67, 115, 118
Amaranthaceae	Dysphania ambrosioides (L.) Mosyakin & Clemants	Arrastrado, Caré, Ka'a re, Paico, Paico grande, Paico macho, Paico rosado, Yerba Santa María	1		1					1		1	1		1, 2, 8, 9, 11, 20, 24, 25, 26, 27, 28, 30, 32, 33, 34, 36, 37, 41, 42, 44, 46, 47, 53, 54, 58, 59, 62, 63, 64, 65, 67, 68, 69, 71, 74, 75, 76, 77, 81, 83, 84, 87, 88, 89, 93, 95, 100, 101, 104, 105, 107, 109, 110, 113, 116, 118, 119, 121, 122, 123, 124
Amaranthaceae	Dysphania chilensis (Schrad.) Mosyakin & Clemants	Paico macho											1		118
Amaranthaceae	Dysphania mandonii (S.Watson) Mosyakin & Clemants	Arca, Arca yuyo, Arcayuyo, Harca, Jarca, Yerba larca	1										1		2, 20, 35, 41, 65, 66, 86, 116
Amaranthaceae	Dysphania oblanceolata (Speg.) Mosyakin & Clemants✤	Paico arrastrado		1											57
Amaranthaceae	Dysphania retusa (Juss. ex Moq.) Mosyakin & Clemants	Paico											1		37
Amaranthaceae	Gomphrena boliviana Moq.												1		74
Amaranthaceae	Gomphrena celosioides Mart.	Perpetua, Perudilla											1		54, 68, 74, 75, 76
Amaranthaceae	Gomphrena haenkeana Mart.				1										46
Amaranthaceae	Gomphrena martiana Gillies ex Moq.	Yuyo blanco			1										85
Amaranthaceae	Gomphrena mendocina (Phil.) R.E.Fr.	Yerba del pollo			1								1		92, 93, 95
Amaranthaceae	Gomphrena perennis L.	Uña de gato			1								1		33, 105
Amaranthaceae	Gomphrena pulchella Mart.	Sandía paca			1								1		74, 76, 105
Amaranthaceae	Guilleminea densa (Humb. & Bonpl. ex Schult.) Moq.	Yerba del pollo											1		77, 81
Amaranthaceae	Heterostachys ritteriana (Moq.) Ung.-Sternb.	Jumecito, Verdolaga			1			1							96, 118
Amaranthaceae	Iresine diffusa Humb. & Bonpl. ex Willd.	Peludilla, Sacha arborito								1			1		33, 40, 75, 76
Amaranthaceae	Pfaffia tuberosa (Spreng.) Hicken												1		74, 75, 76
Amaranthaceae	Salicornia sp.	Salicornia, Vidriera	1	1				1					1		59, 76, 106, 107, 118
Amaranthaceae	Suaeda divaricata Moq.	Jume, Jume crespo, Vidriera			1			1					1		20, 92, 96, 118
Amaryllidaceae	Hieronymiella clidanthoides Pax	Charagua												1	66
Amaryllidaceae	Hippeastrum glaucescens (Mart.) Herb.													1	48, 51
Amaryllidaceae	Tristagma ameghinoi (Speg.) Speg.		1												115
Amaryllidaceae	Tristagma patagonicum (Baker) Traub	Chaleo	1										1		57, 58, 115
Amaryllidaceae	Zephyranthes candida (Herb. ex Lindl.) Herb.									1			1	1	68, 76
Amaryllidaceae	Zephyranthes elwesii (C.H.Wright) Nic.García✤	Ajo del diablo, Ajo silvestre, Cebolleta	1										1		56, 57, 58
Amaryllidaceae	Zephyranthes gilliesiana (Herb.) Nic.García	Cebolla de la zorra, Cebolla del zorro, Juanita			1								1		89, 92, 93, 118
Amaryllidaceae	Zephyranthes jamesonii (Baker) Nic.García & S.C.Arroyo	Cebolla de la zorra											1		93
Amaryllidaceae	Zephyranthes saltensis (Ravenna) S.C.Arroyo	Cebolla del monte											1		119
Anacardiaceae	Lithraea molleoides (Vell.) Engl.	Molle, Molle de beber, Molle blanco, Molle Córdoba, Molle cordobés	1	1	1			1	1				1	1	7, 8, 9, 11, 12, 15, 29, 32, 33, 34, 45, 46, 65, 79, 81, 87, 108, 122, 123, 124
Anacardiaceae	Myracrodruon balansae (Engl.) Santin												1		68, 74, 75
Anacardiaceae	Schinopsis balansae Engl.	Quebracho colorado, Quebracho colorado chaqueño			1			1		1			1		74, 76, 78, 103, 105
Anacardiaceae	Schinopsis lorentzii (Griseb.) Engl.	Horco quebracho, Orco quebracho, Orcoquebracho, Quebracho colorado, Quebrado colorado santiagueño			1			1	1	1			1	1	9, 34, 45, 64, 79, 80, 89, 103, 105, 110, 111, 112, 113, 114, 119, 120, 122, 124
Anacardiaceae	Schinus bumelioides I.M.Johnst.	Molle, Moradillo			1	1							1		85
Anacardiaceae	Schinus fasciculatus (Griseb.) I.M.Johnst.	Burro mikuna, Molle, Molle incienso, Molle negro, Molle pispito, Molle pispo, Molle tonte, Molle tonto, Molle sonso, Moradillo, Pipito	1		1			1	1				1	1	9, 20, 30, 45, 46, 68, 69, 74, 76, 79, 81, 83, 84, 85, 98, 105, 107, 109, 110, 123, 124
Anacardiaceae	Schinus group (Schinus areira L. + Schinus molle L.)	Aguaribay, Aguarubay hoja, Árbol de la pimienta, Gualeguay, Guareguay, Molle, Molle castillo, Pimienta rosa, Terebinto	1	1				1	1	1			1	1	1, 8, 9, 20, 27, 29, 32, 33, 35, 36, 42, 44, 59, 64, 65, 66, 67, 77, 79, 81, 83, 86, 87, 98, 108, 116, 122, 124
Anacardiaceae	Schinus johnstonii F.A.Barkley✤	Falso molle, Molle, Molle blanco, Molle colorado, Molle negro, Moradillo	1		1			1	1	1			1		12, 16, 17, 21, 27, 33, 58, 91, 92, 93, 95, 96, 104, 118
Anacardiaceae	Schinus lentiscifolia Marchand												1		75
Anacardiaceae	Schinus longifolia (Lindl.) Speg.	Molle, Moradillo	1		1				1				1		68, 69, 74, 76, 79, 102, 103
Anacardiaceae	Schinus marchandii F.A.Barkley	Molle blanco	1					1	1	1			1		16, 17, 27, 115
Anacardiaceae	Schinus meyeri F.A.Barkley	Chirimolle											1		42
Anacardiaceae	Schinus odonellii F.A.Barkley	Falso molle, Michí, Molle	1										1	1	21, 27, 57, 58
Anacardiaceae	Schinus patagonica (Phil.) I.M.Johnst. ex Cabrera	Laura							1				1	1	10, 21, 25, 26, 27, 88, 89, 91
Anacardiaceae	Schinus pilifera I.M.Johnst.	Molle de curtir, Molle sonso, Molle tonto curtidor						1							80
Anacardiaceae	Schinus roigii Ruiz Leal & Cabrera	Molle											1		89
Anacardiaceae	Schinus terebinthifolia Raddi								1				1	1	47, 48, 75
Anacardiaceae	Schinus weinmannifolia Engl.												1		74, 75
Anemiaceae	Anemia australis (Mickel) M.Kessler & A.R.Sm.	Doradilla											1		33, 64, 65, 81
Anemiaceae	Anemia phyllitidis (L.) Sw.												1		47, 75
Anemiaceae	Anemia tomentosa (Savigny) Sw.	Doradilla, Doradilla hembra		1	1					1			1		8, 9, 11, 12, 32, 34, 74, 75, 77, 84, 87, 110, 119, 122, 123, 124
Annonaceae	Annona emarginata (Schltdl.) H.Rainer		1										1		68, 69, 73, 74, 75, 76
Annonaceae	Annona neosalicifolia H.Rainer	Araticú, Areticú	1										1		53, 55, 75
Annonaceae	Annona rugulosa (Schltdl.) H.Rainer	Chirimoya	1						1				1		39, 47
Annonaceae	Xylopia brasiliensis Spreng.		1										1		73, 75
Apiaceae	Apium australe Thouars	Apio silvestre, Nolquín	1										1		56, 57, 58, 60, 72, 88, 115
Apiaceae	Apium panul (Bertero ex DC.) Reiche	Panul	1										1		56, 95
Apiaceae	Apium prostratum Vent.	Apio de/del campo, Apio silvestre											1		89, 97
Apiaceae	Apium sellowianum H.Wolff	Apio cimarrón, Panul											1		62, 67, 74
Apiaceae	Azorella compacta Phil.	Yareta, Yarita											1		1, 20, 42
Apiaceae	Azorella filamentosa Lam.		1												72
Apiaceae	Azorella lycopodioides Gaudich.		1												72
Apiaceae	Azorella monantha Clos	Lenia de piedra, Leña de piedra, Yareta	1						1				1		17, 56, 57, 58, 63, 72, 88, 89, 91
Apiaceae	Azorella prolifera (Cav.) G.M.Plunkett & A.N.Nicolas	Chila, Neneo, Nenewb, Yerba negra							1				1		16, 18, 24, 25, 58, 62, 63, 88, 89, 91, 93, 95, 97, 104, 115
Apiaceae	Azorella selago Hook.f.		1												72
Apiaceae	Azorella trifurcata (Gaertn.) Pers.	Llareta	1		1				1				1		62, 72, 115
Apiaceae	Azorella trisecta (H.Wolff) Mart.Fernández & C.I.Calviño	Espinillo							1						3
Apiaceae	Bolax bovei (Speg.) Dusén		1												72
Apiaceae	Bolax gummifera (Lam.) Spreng.		1						1				1		72, 115
Apiaceae	Centella asiatica (L.) Urb.	Centella asiática											1		65, 67
Apiaceae	Chaerophyllum andicola (Kunth) K.F.Chung		1												72
Apiaceae	Cyclospermum leptophyllum (Pers.) Britton & P.Wilson	Apio cimarrón, Apio silvestre, Culandrillo	1										1		30, 33, 67, 71, 73, 75, 101, 107
Apiaceae	Daucus pusillus Michx.												1		71
Apiaceae	Diposis patagonica Skottsb.✤	Yacón, Yocón-llocúm	1												56, 57, 58, 63
Apiaceae	Eryngium coronatum Hook. & Arn.												1		68, 69, 74
Apiaceae	Eryngium ebracteatum Lam.	Escorcera			1										46
Apiaceae	Eryngium eburneum Decne.												1		68, 69, 74, 76
Apiaceae	Eryngium echinatum Urb.												1		74
Apiaceae	Eryngium elegans Cham. & Schltdl.	Cardilla, Turutu tu'i											1		33, 74, 76, 100
Apiaceae	Eryngium horridum Malme												1		69, 74, 75, 76
Apiaceae	Eryngium nudicaule Lam.												1		74
Apiaceae	Eryngium paniculatum Cav. & Dombey ex F.Delaroche	Chupaya, Cupalla, Falso caraguatá	1										1		23, 24, 58, 63, 97
Apiaceae	Eryngium pristis Cham. & Schltdl.												1		75
Apiaceae	Eryngium sanguisorba Cham. & Schltdl.												1		76
Apiaceae	Osmorhiza berteroi DC.	Cacho de cabra		1									1		21, 58, 88
Apiaceae	Osmorhiza depauperata Phil.	Owwnim, Yahgan		1											21
Apiaceae	Sanicula graveolens Poepp. ex DC.	Cilantro, Cilantro de campo, Cilantro criollo, Cilantro silvestre		1									1		25, 56, 57, 58, 59, 60, 63, 89
Apocynaceae	Araujia angustifolia (Hook. & Arn.) Steud.		1										1		68, 69, 74, 76
Apocynaceae	Araujia brachystephana (Griseb.) Fontella & Goyder	Doca, Tasi, Tasis	1	1	1								1	1	29, 33, 64, 68, 69, 74, 81, 83, 108, 123, 124
Apocynaceae	Araujia odorata (Hook. & Arn.) Fontella & Goyder	Corona de novia, Doca, Doca lisa, Doquial, Tasi	1		1			1	1	1	1		1		4, 5, 8, 9, 11, 20, 30, 32, 33, 34, 67, 68, 69, 74, 76, 90, 102, 103, 105, 106, 107, 108, 110, 111, 114, 119, 122
Apocynaceae	Araujia plumosa Schltdl.		1												68, 69
Apocynaceae	Araujia sericifera Brot.	Tasi	1										1		23, 33, 71, 74
Apocynaceae	Araujia stormiana Morong		1												68, 69
Apocynaceae	Araujia stuckertiana (Kurtz ex Heger) Fontella & Goyder	Doca 'i víbora, Doca I'zorro			1								1		110, 111
Apocynaceae	Araujia variegata (Griseb.) Fontella & Goyder		1										1		68, 69, 119
Apocynaceae	Asclepias barjoniifolia E.Fourn.	Matatodo											1		110
Apocynaceae	Asclepias mellodora A.St.-Hil.	Yerba de la víbora, Yerba de la vida						1			1		1		33, 112, 113, 118
Apocynaceae	Asclepias pilgeriana Schltr.	Leche tres											1		42
Apocynaceae	Aspidosperma australe Müll.Arg.							1							52
Apocynaceae	Aspidosperma quebracho-blanco Schltdl.	Quebrachillo, Quebracho, Quebracho blanco	1	1	1			1	1	1	1	1	1	1	4, 9, 11, 30, 33, 34, 45, 68, 70, 74, 76, 77, 79, 81, 83, 102, 103, 105, 107, 109, 110, 113, 114, 119, 122, 123, 124
Apocynaceae	Aspidosperma triternatum Rojas Acosta	Quebrachillo						1					1		70, 76, 107, 119
Apocynaceae	Condylocarpon isthmicum (Vell.) A.DC.							1							49
Apocynaceae	Cristobalia australis (Malme) H.A.Keller & Liede		1												69
Apocynaceae	Cynanchum montevidense Spreng.	Doca 'el diablo	1		1			1					1		4, 107, 111, 112
Apocynaceae	Forsteronia glabrescens Müll.Arg.							1							49
Apocynaceae	Funastrum clausum (Jacq.) Schltr.	Doca 'el agua	1		1								1		4, 68, 69, 90, 111, 113
Apocynaceae	Funastrum gracile (Decne.) Schltr.	Cortachina, Tasi de víbora, Tramontana	1		1			1	1	1	1		1		4, 5, 85, 105, 109, 110, 111, 112, 114
Apocynaceae	Gonolobus rostratus (Vahl) Roem. & Schult.		1						1				1		68, 69, 76
Apocynaceae	Ibatia fiebrigii (Schltr.) Morillo									1					114
Apocynaceae	Macropharynx peltata (Vell.) J.F.Morales, M.E.Endress & Liede							1					1		47, 49
Apocynaceae	Macroscepis aurea E.Fourn.		1												90
Apocynaceae	Macroscepis grandiflora (Mart.) H.A.Keller & Liede	Doca espinuda	1		1										68, 69, 111
Apocynaceae	Macroscepis schreiteri (Descole & T.Mey.) H.A.Keller & Liede		1							1					4, 114
Apocynaceae	Mandevilla angustifolia (Malme) Woodson												1		119
Apocynaceae	Mandevilla petraea (A.St.-Hil.) Pichon												1		74
Apocynaceae	Oxypetalum brachystemma Malme												1		75
Apocynaceae	Oxypetalum solanoides Hook. & Arn.												1		71
Apocynaceae	Philibertia gilliesii Hook. & Arn.	Enredadera del avestruz			1										92
Apocynaceae	Philibertia parviflora (Malme) Goyder	Llamita, Lecherón	1												66
Apocynaceae	Rauvolfia sellowii Müll.Arg.	Quina											1		53, 54
Apocynaceae	Ruehssia castillonii (Lillo ex T.Mey.) H.A.Keller & Liede		1							1					4, 114
Apocynaceae	Tabernaemontana catharinensis A.DC.	Horquetero, Sapirangy							1	1			1		47, 53, 54, 74, 100
Apocynaceae	Tweedia brunonis Hook. & Arn.	Yerba del pujo											1		95
Apocynaceae	Vallesia glabra (Cav.) Link	Ancoche, Ancocho, Coquillo, Siempreverde	1		1			1	1	1		1	1		4, 9, 11, 45, 83, 85, 90, 98, 105, 109, 110, 111, 112, 113, 119, 120, 122, 124
Aquifoliaceae	Ilex dumosa Reissek		1												73, 75
Aquifoliaceae	Ilex paraguariensis A.St.-Hil.	Erva mate, Yerba, Yerba mate	1					1	1	1			1	1	1, 39, 41, 42, 47, 48, 53, 54, 61, 64, 67, 73, 74, 75, 80, 81, 84, 89, 92, 93, 94, 95, 98, 105, 107, 109, 110, 115, 116, 118
Araceae	Anthurium paraguayense Engl.									1			1		74
Araceae	Gorgonidium vermicidum (Speg.) Bogner & Nicolson	Papa de víbora											1		42
Araceae	Lemna gibba L.	Lenteja de agua, Rojilla			1										46, 105
Araceae	Pistia stratiotes L.	Lenteja peluda, Repollito de agua, Repollo de agua		1	1					1			1	1	23, 75, 82, 105, 111, 114
Araceae	Synandrospadix vermitoxicum (Griseb.) Engl.	Pelamano, Sacha col	1							1	1		1		4, 83, 105, 109, 113, 114, 119
Araceae	Thaumatophyllum bipinnatifidum (Schott ex Endl.) Sakur., Calazans & Mayo	Banana del monte, Guembé, Güembé	1					1		1			1		22, 47, 48, 49, 50, 52, 55, 68, 73, 74, 75
Araceae	Thaumatophyllum tweedieanum (Schott ex Endl.) Sakur., Calazans & Mayo												1		74
Araliaceae	Aralia warmingiana (Marchal) J.Wen	Sabuguero											1		53, 75
Araliaceae	Didymopanax morototoni (Aubl.) Decne. & Planch.												1		75
Araliaceae	Hydrocotyle bonariensis Lam.	Paraguita, Redondita del agua											1		12, 33, 71, 74, 75
Araliaceae	Hydrocotyle callicephala Cham.												1		47
Araliaceae	Hydrocotyle exigua (Urb.) Malme		1										1		73, 75
Araliaceae	Hydrocotyle leucocephala Cham. & Schltdl.												1		69, 75
Araliaceae	Hydrocotyle ranunculoides L.f.	Arandela del agua, Paraguita, Redondo del agua			1								1		33, 46
Araliaceae	Oreopanax kuntzei Harms	Higuerilla											1		42
Araliaceae	Raukaua laetevirens (Gay) Frodin	Sauco del diablo											1		21
Araucariaceae	Araucaria angustifolia (Bertol.) Kuntze	Araucaria, Pino araucaria, Pino paraná	1					1		1			1		49, 53, 55, 73, 75, 100
Araucariaceae	Araucaria araucana (Molina) K.Koch	Araucaria, Pehuen, Pehuén, Pino piñonero, Piñones	1										1	1	21, 26, 56, 57, 58, 59, 63
Arecaceae	Acrocomia aculeata (Jacq.) Lodd. ex Mart.	Coco, Coco del diablo, Mbocaja	1				1	1					1		22, 47, 48, 50, 52, 53, 55, 73, 74, 75, 100
Arecaceae	Allagoptera campestris (Mart.) Kuntze		1												73, 75
Arecaceae	Butia paraguayensis (Barb.Rodr.) L.H.Bailey												1		74
Arecaceae	Butia yatay (Mart.) Becc.							1					1		48, 74
Arecaceae	Copernicia alba Morong	Palma	1		1			1					1		4, 68, 69, 74, 76, 90, 106, 111
Arecaceae	Euterpe edulis Mart.	Palmito	1					1							49, 55
Arecaceae	Syagrus romanzoffiana (Cham.) Glassman	Coquero, Pindó	1				1	1					1		47, 48, 50, 52, 53, 55, 68, 69, 73, 74, 75
Arecaceae	Trithrinax campestris (Burmeist.) Drude & Griseb.	Palma, Palma caranday	1		1			1							76, 103, 108
Aristolochiaceae	Aristolochia angustifolia Cham.												1		74
Aristolochiaceae	Aristolochia argentina Griseb.	Charrúa, Charruga, Mil hombres	1		1								1		8, 9, 20, 65, 81, 84, 122, 123, 124
Aristolochiaceae	Aristolochia elegans Mast.	Mil hombre								1			1		74, 100
Aristolochiaceae	Aristolochia fimbriata Cham.	Contrayerba								1			1		74, 100
Aristolochiaceae	Aristolochia gibertii Hook.												1		68, 74
Aristolochiaceae	Aristolochia lingua Malme	Buche de pavo, Flor patito									1				105
Aristolochiaceae	Aristolochia prostrata Duch.	Baje								1			1		44
Aristolochiaceae	Aristolochia stuckertii Speg.	Charrúa											1		33
Aristolochiaceae	Aristolochia triangularis Cham.	Isipó milhombre, Mil hombres, Milhombres, Sipo mil hombres								1			1		47, 53, 54, 67
Aristolochiaceae	Aristolochia trilobata L.									1			1		68, 74
Aristolochiaceae	Prosopanche americana (R.Br.) Baill.	Batata 'e cuchi, Flor de piedra, Flor de tierra, Guaicurú, Guaycurú, Huaycurú, Papa de monte	1		1			1		1			1		9, 30, 98, 105, 111, 113, 114, 118, 122, 124
Aristolochiaceae	Prosopanche bonacinai Speg.	Papa del monte	1												118
Asparagaceae	Herreria bonplandii Lecomte												1		68, 69, 74
Asparagaceae	Herreria montevidensis Klotzsch ex Griseb.												1		68, 69, 74
Asteraceae	Acanthospermum australe (Loefl.) Kuntze	Tapecué, Torito								1			1		33, 47, 53, 54, 74, 75
Asteraceae	Acanthospermum hispidum DC.	Cuajilla, Guasdrilla, Huajclilla, Horquetilla, Torito			1					1	1		1		33, 46, 74, 105, 107, 110, 119
Asteraceae	Acanthostyles buniifolius (Hook. & Arn.) R.M.King & H.Rob.	Romerillo, Romerillo colorado										1	1		33, 93, 95
Asteraceae	Achyrocline alata (Kunth) DC.	Amaicha blanca, Güira güira, Uira, Villa villa											1		41, 42, 44
Asteraceae	Achyrocline flaccida (Weinm.) DC.	Amaicha, Marcela, Vila vila											1		42, 54
Asteraceae	Achyrocline hyperchlora Blake	Amaicha											1		42
Asteraceae	Achyrocline satureioides (Lam.) DC.	Marcela, Marcela amarilla, Marcela hembra, Marcela flor, Marcelita, Vira, Vira-vira, Salvia			1			1					1		2, 9, 12, 20, 32, 33, 34, 35, 37, 43, 46, 47, 53, 64, 65, 67, 68, 74, 75, 77, 81, 100, 107, 116, 122, 123, 124
Asteraceae	Achyrocline tomentosa Rusby	Marcela, Marcela amarilla, Marcela flor, Uira, Vira-vira											1		9, 33, 44, 65
Asteraceae	Acmella decumbens (Sm.) R.K.Jansen	Barba de indio, Margarita amarilla, Matadiente, Ñil-ñil, Zuma											1		32, 33, 71, 81, 118
Asteraceae	Acmella oppositifolia (Lam.) R.K.Jansen	Yuyo picante	1	1						1					4, 90, 112, 114
Asteraceae	Ageratum conyzoides L.	Borraja del campo, Borrajilla											1		41, 42
Asteraceae	Aldama anchusifolia (DC.) E.E.Schill. & Panero												1		76
Asteraceae	Aldama helianthoides (Rich.) E.E.Schill. & Panero	Suncho			1										13
Asteraceae	Ambrosia artemisiifolia L.	Altamisa, Artemisa								1			1		33, 54, 68, 69, 74, 75, 76
Asteraceae	Ambrosia tenuifolia Spreng.	Altamisa, Artemisa			1					1			1		9, 33, 38, 68, 69, 71, 74, 76, 81, 107, 109, 110, 122, 124
Asteraceae	Archidasyphyllum diacanthoides (Less.) P.L.Ferreira, Saavedra & Groppo	Palo santo											1		58
Asteraceae	Artemisia copa Phil.	Copa											1		86
Asteraceae	Artemisia mendozana DC.	Certal, Sertal											1		67
Asteraceae	Aspilia aff. pascalioides Griseb.												1		107
Asteraceae	Aspilia pascalioides Griseb.													1	48
Asteraceae	Austrobrickellia patens (D.Don ex Hook. & Arn.) R.M.King & H.Rob.	Bejuco, Mejuco, Oculto			1			1					1		92, 93, 111, 112
Asteraceae	Austroeupatorium inulifolium (Kunth) R.M.King & H.Rob.									1			1		74
Asteraceae	Baccharis albida Hook. & Arn.												1		107
Asteraceae	Baccharis aliena (Spreng.) Joch.Müll.	Pichana, Romerillo, Romerillo dulce						1	1				1		33, 64, 65, 79, 81, 124
Asteraceae	Baccharis artemisioides Hook. & Arn.												1		71
Asteraceae	Baccharis articulata (Lam.) Pers.	Carqueja, Carquejilla, Carquesha, Chirca meloza			1			1		1			1		8, 9, 12, 32, 33, 34, 43, 53, 54, 64, 65, 68, 71, 74, 76, 77, 81, 101, 105, 122, 123, 124
Asteraceae	Baccharis boliviensis (Wedd.) Cabrera	Chijua, Tola			1				1						13, 66
Asteraceae	Baccharis cf. vulneraria Baker												1		75
Asteraceae	Baccharis coridifolia DC.	Mío, Mio mio, Miyo, Nillo, Niño, Nio, Nío, Nio-nio, Niyo, Romerillo						1			1	1	1		12, 32, 33, 42, 68, 69, 71, 74, 76, 77, 83, 84, 99, 105
Asteraceae	Baccharis crispa Spreng.	Carqueja, Carquejilla, Carquejilla ancha, Carquejita		1									1		9, 11, 12, 32, 64, 65, 77, 81, 84, 87, 118, 123
Asteraceae	Baccharis darwinii Hook. & Arn.	Yerba de la oveja			1										118
Asteraceae	Baccharis dracunculifolia DC.	Chilca, Prementina, Romerillo grande, Tola			1			1		1				1	13, 44, 47, 48, 61, 105
Asteraceae	Baccharis flabellata Hook. & Arn.	Clavillo			1			1	1		1				45, 46, 80, 84
Asteraceae	Baccharis genistifolia DC.												1		71
Asteraceae	Baccharis gilliesii A.Gray	Yerba de oveja			1										92
Asteraceae	Baccharis glutinosa Pers.	Chilca, Sunchillo, Suncho									1		1		33, 75, 83, 88
Asteraceae	Baccharis grisebachii Hieron.	Quinchamal						1	1				1		42, 44, 66
Asteraceae	Baccharis juncea (Cass.) Desf.	Junco						1							118
Asteraceae	Baccharis linearifolia (Lam.) Pers.	Chilca troja, Jarillilla											1		41, 75, 93
Asteraceae	Baccharis microcephala (Less.) DC.												1		74
Asteraceae	Baccharis microdonta DC.	Tola						1							61
Asteraceae	Baccharis notosergila Griseb.							1		1			1		68, 76, 107
Asteraceae	Baccharis obovata Hook. & Arn.	Huautro, Wawtrub											1		58, 88, 89
Asteraceae	Baccharis oxyodonta DC.												1		47
Asteraceae	Baccharis patagonica Hook. & Arn.	Bautro											1		97
Asteraceae	Baccharis punctulata DC.												1		47
Asteraceae	Baccharis sagittalis (Less.) DC.	Carqueja											1		25, 26, 27, 28, 58, 88, 89, 97, 121
Asteraceae	Baccharis salicifolia (Ruiz & Pav.) Pers.	Chilca, Chilca amarga, Suncho, Suncho blanco			1			1	1	1			1		5, 9, 21, 24, 25, 27, 33, 44, 58, 63, 79, 85, 86, 91, 92, 93, 95, 98, 105, 109, 110, 111, 112, 114, 118, 119, 122, 124
Asteraceae	Baccharis sculpta Griseb.	Chilca, Chilca hoja larga			1								1		13, 41
Asteraceae	Baccharis spartioides (Hook. & Arn. ex DC.) J.Remy	Pichana		1				1					1		92, 94, 95, 118
Asteraceae	Baccharis spicata (Lam.) Baill.	Carqueja hoja											1		65, 107
Asteraceae	Baccharis tenella Hook. & Arn.	Yerba mora			1										96
Asteraceae	Baccharis tola Phil.	Lejía							1						3
Asteraceae	Baccharis trimera (Less.) DC.	Carqueja			1								1		23, 24, 36, 38, 41, 42, 54, 62, 63, 67, 74, 93, 95, 102, 103, 118
Asteraceae	Baccharis ulicina Hook. & Arn.	Yerba meona, Yerba oveja			1										46
Asteraceae	Bidens andicola Kunth	Pante amarillo, Saitilla	1		1					1			1		13, 40, 41, 66
Asteraceae	Bidens pilosa L.	Amor seco, Saipiya, Saitilla, Saitilla blanca	1	1	1			1		1			1		13, 29, 42, 44, 47, 61, 74, 76
Asteraceae	Bidens subalternans DC.	Amor seco, Manzanilla silvestre, Picão, Picón								1			1		9, 53, 54, 68, 74, 75, 76, 122
Asteraceae	Calea pinnatifida (R.Br.) Less.	Infalibina											1		53
Asteraceae	Campovassouria cruciata (Vell.) R.M.King & H.Rob.	Prementina											1		42
Asteraceae	Campuloclinium macrocephalum (Less.) DC.									1			1		30, 33, 71, 74, 76
Asteraceae	Centratherum punctatum Cass.												1		75
Asteraceae	Chaptalia nutans (L.) Pol.	Achicoria, Diente de león, Marancel, Pelodilla, Rejón	1										1		39, 42, 47, 54, 76, 100, 107
Asteraceae	Chaptalia sinuata (Less.) Baker	Yerba de San Juan											1		33
Asteraceae	Chevreulia sarmentosa (Pers.) S.F.Blake												1		75
Asteraceae	Chiliophyllum densifolium Phil.	Romero pichi											1		62
Asteraceae	Chiliotrichum diffusum (G.Forst.) Kuntze							1					1		72, 88
Asteraceae	Chromolaena arnottiana (Griseb.) R.M.King & H.Rob.	Clavel											1		44
Asteraceae	Chromolaena caaguazuensis (Hieron.) R.M.King & H.Rob.							1							49
Asteraceae	Chromolaena christieana (Baker) R.M.King & H.Rob.	Doctorcito			1								1		30, 74, 110, 111
Asteraceae	Chromolaena hirsuta (Hook. & Arn.) R.M.King & H.Rob.	Pilarcito											1		33, 74
Asteraceae	Chromolaena hookeriana (Griseb.) R.M.King & H.Rob.	Hediondilla, Hediondilla negra	1										1		39, 42
Asteraceae	Chromolaena ivifolia (L.) R.M.King & H.Rob.												1		68
Asteraceae	Chromolaena laevigata (Lam.) R.M.King & H.Rob.									1			1		74
Asteraceae	Chuquiraga acanthophylla Wedd.	Espina amarilla							1				1		66
Asteraceae	Chuquiraga avellanedae Lorentz	Pincha bola, Quilembay, Quilimbay, Trallao, Trayao, Trayawb							1				1		89, 91, 104
Asteraceae	Chuquiraga erinacea D.Don	Ardegras, Chilladora, Chirriadera, Montetachuela			1				1						16, 62, 92, 118
Asteraceae	Chuquiraga longiflora (Griseb.) Hieron.	Palo amarillo			1										13
Asteraceae	Chuquiraga oppositifolia D.Don	Palo amarillo			1										13
Asteraceae	Conyza blakei (Cabrera) Cabrera										1				73
Asteraceae	Conyza bonariensis (L.) Cronquist	Carnicera, Rama negra, Yerba carnicera						1			1		1		32, 33, 52, 65, 68, 71, 74, 75, 81, 84, 105, 123
Asteraceae	Conyza glandulitecta Cabrera												1		100
Asteraceae	Conyza sumatrensis (Retz.) E.Walker												1		47
Asteraceae	Cosmos peucedanifolius Wedd.	Panti-panti											1		44
Asteraceae	Cyclolepis genistoides Gillies ex D.Don	Matorro, Palo azul		1	1			1	1				1		8, 9, 11, 20, 30, 35, 62, 64, 65, 67, 74, 76, 81, 93, 95, 96, 103, 107, 110, 113, 116, 118, 119, 120, 122, 124
Asteraceae	Dendrophorbium bomanii (R.E.Fr.) C.Jeffrey	Cosillo, Cosillo blanco						1		1			1		40, 42, 61
Asteraceae	Dendrophorbium peregrinum (Griseb.) C.Jeffrey	Cuetillo								1					40
Asteraceae	Dimerostemma apense (Chodat) M.D.Moraes	Girasol del campo, Suncho								1					40
Asteraceae	Dolichlasium lagascae D.Don	Yerba del ciervo											1		95
Asteraceae	Egletes viscosa (L.) Less.	Engordaoveja			1										111
Asteraceae	Elephantopus mollis Kunth									1			1		68, 76
Asteraceae	Enydra anagallis Gardner	Yuyo 'el agua			1										111
Asteraceae	Facelis retusa (Lam.) Sch.Bip.												1		71
Asteraceae	Flaveria bidentis (L.) Kuntze	Balda, Balda amarilla, Fique			1			1			1		1		9, 30, 98, 102, 105, 110, 122, 124
Asteraceae	Flaveria haumanii Dimitri & Orfila	Chasca			1										85
Asteraceae	Flourensia thurifera (Molina) DC.	Chilca, Chilca del campo			1			1	1				1		9, 79, 122, 124
Asteraceae	Gaillardia megapotamica (Spreng.) Baker	Botón de oro, Gaillardia, Topasaire, Topazaire			1								1		9, 33, 46, 64, 65, 71, 81, 84, 85, 87, 93, 107, 118, 122, 123, 124
Asteraceae	Gamochaeta americana (Mill.) Wedd.	Vira											1		33, 74
Asteraceae	Gamochaeta calviceps (Fernald) Cabrera												1		74
Asteraceae	Gamochaeta filaginea (DC.) Cabrera												1		69, 74
Asteraceae	Gamochaeta pensylvanica (Willd.) Cabrera	Vira-vira											1		74, 100
Asteraceae	Gamochaeta simplicicaulis (Willd. ex Spreng.) Cabrera													1	71
Asteraceae	Gochnatia palosanto Cabrera	Palo santo											1		42
Asteraceae	Grindelia chiloensis (Cornel.) Cabrera	Botón de oro, Melosa, Virreina	1		1			1	1				1	1	17, 18, 19, 57, 58, 89, 92, 93, 95, 104
Asteraceae	Grindelia pulchella Dunal	Botoncito, Melosa			1			1					1		33, 124
Asteraceae	Gutierrezia mandonii (Sch.Bip.) Solbrig	Amaicha-chica											1		44
Asteraceae	Gyptis artemisifolia (Griseb.) R.M.King & H.Rob.	Artemisia											1		33
Asteraceae	Haplopappus glutinosus Cass.	Baylahuen											1		58
Asteraceae	Haplopappus rigidus Phil.	Bailabuena, Vaila buena, Waila vidita											1		20, 86
Asteraceae	Heterosperma ovatifolium Cav.	Amor seco											1		44
Asteraceae	Heterosperma tenuisectum (Griseb.) Cabrera	Roquecito											1		87
Asteraceae	Hyalis argentea D.Don ex Hook. & Arn.	Blanquilla, Olivillo, Olivo			1			1					1		92, 93, 95, 96, 118
Asteraceae	Hymenoxys anthemoides (Juss.) Cass.												1		107
Asteraceae	Hypochaeris chillensis (Kunth) Hieron.	Achicoria, Achicoria salvaje, Achicoria sivestre, Dzika achicoria	1										1		53, 54, 55, 69, 73, 74, 75
Asteraceae	Hypochaeris incana (Hook. & Arn.) Macloskie		1										1		72, 115
Asteraceae	Hypochaeris meyeniana (Walp.) Benth. & Hook.f. ex Griseb	Achicoria			1			1							66
Asteraceae	Hypochaeris microcephala (Sch.Bip.) Cabrera		1										1		73, 74, 75
Asteraceae	Hypochaeris pampasica Cabrera												1		71
Asteraceae	Hysterionica glaucifolia (Kuntze) Solbrig	Duraznillo											1		95
Asteraceae	Jungia polita Griseb.	Cola de cordero, Zarzaparrilla			1					1			1		9, 12, 32, 33, 40, 64, 65, 81, 122, 123, 124
Asteraceae	Lepidaploa balansae (Hieron.) H.Rob.												1		47
Asteraceae	Lepidophyllum cupressiforme (Lam.) Cass.								1						115
Asteraceae	Lessingianthus glabratus (Less.) H.Rob.									1					68
Asteraceae	Lessingianthus mollissimus (D.Don ex Hook. & Arn.) H.Rob.												1		33
Asteraceae	Mikania cordifolia (L.f.) Willd.				1								1		74, 111
Asteraceae	Mikania glomerata Spreng.												1		75
Asteraceae	Mikania lindleyana DC.							1							50
Asteraceae	Mikania micrantha Kunth												1		47
Asteraceae	Mikania periplocifolia Hook. & Arn.	Enredadera del campo, Loconte											1		20, 33, 81
Asteraceae	Moquiniastrum argentinum (Cabrera) G.Sancho	Chilca									1		1		105, 107
Asteraceae	Mutisia acuminata Ruiz & Pav.	Chinchircoma											1		44
Asteraceae	Mutisia decurrens Cav.	Mutisia											1		58
Asteraceae	Mutisia friesiana Cabrera	Chinchircoma											1		2
Asteraceae	Mutisia ledifolia Decne. ex Wedd.	Oque tola			1										13
Asteraceae	Mutisia oligodon Poepp. & Endl.	Mutisia											1		25
Asteraceae	Mutisia retrorsa Cav.	Redadera											1		89
Asteraceae	Nardophyllum bryoides (Lam.) Cabrera	Siete camisas, Sietecamisas											1	1	25, 89, 104
Asteraceae	Nassauvia axillaris (Lag. ex Lindl.) D.Don	Barba de viejo, Uña de gato							1				1		16, 17, 58, 91, 95
Asteraceae	Nassauvia glomerulosa (Lag. ex Lindl.) D.Don	Uña de gato, Cola (de) piche											1	1	19, 89
Asteraceae	Ophryosporus axilliflorus (Griseb.) Hieron.	Charrua											1		33
Asteraceae	Parastrephia lepidophylla (Wedd.) Cabrera	Tola tola											1		41
Asteraceae	Parastrephia lucida (Meyen) Cabrera	Tola							1						3
Asteraceae	Parastrephia quadrangularis (Meyen) Cabrera	Tola flor, Tola tola								1			1		3, 41, 65
Asteraceae	Parthenium hysterophorus L.	Altamisa, Altamisa amarga, Altamisa del bordo, Altamisa silvestre, Vira-vira			1					1		1	1		30, 33, 34, 44, 46, 62, 81, 87, 92, 93, 95, 96, 105, 110, 123
Asteraceae	Pascalia glauca Ortega	Sunchillo									1				85, 105
Asteraceae	Pectis odorata Griseb.	Limoncillo, Manzanilla del campo, Manzanilla dulce, Manzanilla del monte, Manzanilla 'el monte		1	1					1			1		11, 30, 46, 74, 109, 110, 111, 113, 119
Asteraceae	Pentaphorus glutinosus D.Don	Jarillilla			1								1		92, 93, 95, 96
Asteraceae	Perezia multiflora (Humb. & Bonpl.) Less.	Ezcorzonera											1		33
Asteraceae	Perezia pungens (Humb. & Bonpl.) Less.	Flor de marancel, Raíz de marancel											1		86
Asteraceae	Picrosia longifolia D.Don	Picrosia						1					1		33
Asteraceae	Piptocarpha sellowii (Sch.Bip.) Baker	Infalibina											1		53, 75
Asteraceae	Pluchea microcephala R.K.Godfrey	Cuatro cantos											1		109, 110, 119
Asteraceae	Pluchea sagittalis (Lam.) Cabrera	Cuatro cantos, Hierba lucero, Lucera, Yerba lucera		1	1					1		1	1		9, 23, 30, 33, 38, 42, 64, 68, 74, 76, 81, 82, 100, 105, 107, 109, 110, 113, 119, 122, 124
Asteraceae	Porophyllum lanceolatum DC.	Quilquina								1					44
Asteraceae	Porophyllum linifolium (Ard.) DC.	Yerba del venado											1		12
Asteraceae	Porophyllum obscurum (Spreng.) DC.	Quilquina, Yerba del venado			1					1			1		9, 33, 44, 122, 123, 124
Asteraceae	Porophyllum ruderale (Jacq.) Cass.	Yerba del ciervo											1		33, 47, 74, 75
Asteraceae	Proustia cuneifolia D.Don	Charcoma											1		33
Asteraceae	Pseudognaphalium cheiranthifolium (Lam.) Hilliard & B.L.Burtt	Marcela macho											1		33, 74
Asteraceae	Pseudognaphalium cymatoides (Kunze ex DC.) Anderb.	Santa maria											1		58
Asteraceae	Pseudognaphalium gaudichaudianum (DC.) Anderb.	Marcela macho, Vira-vira, Yateí caá											1		33, 53, 74, 77
Asteraceae	Pseudognaphalium tarapacanum (Phil.) Anderb.	Vira vira											1		86
Asteraceae	Pseudognaphalium viravira (Molina) Anderb.	Vira vira, Vira-vira											1		44, 58
Asteraceae	Pterocaulon alopecuroides (Lam.) DC.	Toto-caamoroti											1		33, 68, 69, 74, 76, 107
Asteraceae	Pterocaulon angustifolium DC.												1		74
Asteraceae	Pterocaulon balansae Chodat									1					47
Asteraceae	Pterocaulon cordobense Kuntze											1	1		33
Asteraceae	Pterocaulon lorentzii Malme												1		68, 74, 76
Asteraceae	Pterocaulon polystachyum DC.									1			1		74, 76
Asteraceae	Pterocaulon purpurascens Malme												1		30
Asteraceae	Pterocaulon rugosum (Vahl) Malme												1		74
Asteraceae	Pterocaulon virgatum (L.) DC.	Yaguarete caa										1	1		33, 74, 107
Asteraceae	Schkuhria pinnata (Lam.) Kuntze ex Thell.	Canchalagua, Escobilla, Hallapichana, Jaius pichana, Matapulgas, Pillaguay			1			1				1	1		9, 32, 33, 34, 42, 44, 46, 65, 81, 83, 85, 87, 122, 123, 124
Asteraceae	Senecio bonariensis Hook. & Arn.	Charcao, Lampazo											1		26, 68, 86
Asteraceae	Senecio clivicola Wedd.	Amaicha											1		41
Asteraceae	Senecio cremeiflorus Mattf.	Lampazo											1		42
Asteraceae	Senecio crepidifolius DC.	Arnica											1		42, 44
Asteraceae	Senecio deferens Griseb.	Balda			1										111
Asteraceae	Senecio eriophyton J.Remy	Chachacoma											1		65
Asteraceae	Senecio filaginoides DC.	Ajenjo blanco, Ajenjo de perro, Charcao, Charcao blanco, Mata mora, Romerillo blanco, Santa María, Té pampa crespo							1				1		16, 17, 18, 26, 27, 58, 91, 93, 95, 104
Asteraceae	Senecio gilliesii Hook. & Arn.	Tara, Triaca											1		95
Asteraceae	Senecio grisebachii Baker									1					76
Asteraceae	Senecio hieronymi Griseb.	Amaicha								1					40
Asteraceae	Senecio neaei DC.									1			1		115
Asteraceae	Senecio nutans Sch.Bip.	Chachacoma											1		1, 20, 65, 86
Asteraceae	Senecio pampeanus Cabrera	Pichanilla			1								1		124
Asteraceae	Senecio patagonicus Hook. & Arn.									1			1		88, 115
Asteraceae	Senecio santelicis Phil.	Chachacoma								1					3
Asteraceae	Senecio subulatus D.Don ex Hook. & Arn.	Romerillo, Romero						1	1				1		16, 17, 93, 118
Asteraceae	Senecio trifurcatus (G.Forst.) Less.									1			1		115
Asteraceae	Senecio vira-vira Hieron.	Vira vira											1		67
Asteraceae	Senecio viridis Phil.	Mocoraca							1						3
Asteraceae	Sigesbeckia serrata DC.	Yuta yuta								1					40
Asteraceae	Smallanthus macroscyphus (Baker) A.Grau ex A.A.Sáenz	Pucunillo, Yacón del campo								1			1		40, 42
Asteraceae	Solidago chilensis Meyen	Vara amarilla, Vara de oro						1			1		1		33, 36, 52, 58, 68, 70, 71, 74, 76, 88
Asteraceae	Solidago microglossa DC.												1		107
Asteraceae	Stenachaenium riedelii Baker												1		74, 75
Asteraceae	Symphyotrichum squamatum (Spreng.) G.L.Nesom	Mata negra											1		44
Asteraceae	Tagetes argentina Cabrera	Chilchil del campo											1		33
Asteraceae	Tagetes campanulata Griseb.	Rosa amarilla, Rosa pascua											1		42
Asteraceae	Tagetes filifolia Lag.	Anis del campo, Anisillo			1								1		13, 33, 41, 42, 44, 77
Asteraceae	Tagetes minuta L.	Chin chin, Chinchilla, Suico, Suico de vaca		1				1		1		1	1		9, 11, 12, 20, 30, 32, 33, 54, 64, 65, 68, 71, 74, 76, 77, 86, 98, 102, 103, 107, 110, 118, 122, 123
Asteraceae	Tagetes pauciloba DC.✤	Chilchil, Chilchil del cerro, Chinchil		1									1		93, 94, 95
Asteraceae	Tagetes terniflora Kunth	Suico		1				1					1		39, 41, 42, 61
Asteraceae	Taraxacum gilliesii Hook. & Arn.		1												72, 115
Asteraceae	Tessaria absinthioides (Hook. & Arn.) DC.	Pajaro bobo											1		62, 67, 93, 95
Asteraceae	Tessaria ambigua DC.	Chilca			1	1		1							85, 112
Asteraceae	Tessaria dodoneifolia (Hook. & Arn.) Cabrera	Chilca dulce, Chilca mulata, Suncho			1			1	1				1		5, 41, 76, 122, 124
Asteraceae	Tessaria integrifolia Ruiz & Pav.	Bobo, Palo bobo			1			1	1	1			1		5, 68, 76, 109, 110, 111, 114
Asteraceae	Thelesperma megapotamicum (Spreng.) Kuntze	Manzanilla del campo, Té pampa, Yerba del venado		1	1								1		33, 81, 92, 93, 94, 95, 96
Asteraceae	Thymophylla pentachaeta (DC.) Small	Gillermito, Perlilla			1								1		9, 93, 122, 124
Asteraceae	Trichocline auriculata (Wedd.) Hieron.	Negroampe											1		44
Asteraceae	Trichocline cineraria (D.Don) Hook. & Arn.	Contrayerba								1			1		95
Asteraceae	Trichocline dealbata (Hook. & Arn.) Benth. & Hook.f. ex Griseb.	Contrayerba											1		95
Asteraceae	Trichocline plicata D.Don ex Hook. & Arn.	Topasaire plateado											1		33
Asteraceae	Trichocline reptans (Wedd.) Hieron.	Arnica, Contrahierba		1									1		33, 93
Asteraceae	Trichocline sinuata (D.Don) Cabrera	Arnica		1									1		33
Asteraceae	Trixis divaricata (Kunth) Spreng.	Contrahierba, Contra yerba, Contrayerba			1			1		1			1		9, 12, 20, 32, 33, 34, 64, 65, 77, 84, 122, 124
Asteraceae	Trixis pallida Less.												1		74
Asteraceae	Urolepis hecatantha (DC.) R.M.King & H.Rob.												1		30
Asteraceae	Verbesina encelioides (Cav.) Benth. & Hook.f. ex A.Gray	Girasol, Girasolillo, Melosa, Mirasol, Mirasol de campo, Quelusilla, Queyu sisa, Santa María			1						1		1		9, 81, 84, 93, 95, 96, 105, 110, 119, 122, 123, 124
Asteraceae	Vernonanthura chamaedrys (Less.) H.Rob.							1					1		68, 74, 76
Asteraceae	Vernonanthura squamulosa (Hook. & Arn.) H.Rob.	Solterilla	1							1					39, 40
Asteraceae	Vernonanthura tweedieana (Baker) H.Rob.	Mata campo, Matacampo											1		53, 54
Asteraceae	Wedelia brachylepis Griseb.	Pante amarillo, Saitilla								1			1		40, 41
Asteraceae	Xanthium ambrosioides Hook. & Arn.	Abrojo vizcachera, Abrojo de vizcacheras						1					1		33, 118
Asteraceae	Xanthium spinosum L.	Abrojito, Abrojo, Abrojo chico, Amor seco, Cadillo, Cadillo de la sierra, Cepa caballo, Cepa de caballo, Clonqui, Espinillo			1			1		1			1		1, 9, 12, 20, 23, 30, 32, 34, 35, 36, 37, 40, 42, 46, 58, 64, 65, 67, 68, 71, 74, 75, 76, 81, 84, 86, 87, 93, 95, 97, 100, 101, 103, 107, 110, 118, 119, 122, 123, 124
Asteraceae	Xanthium strumarium L.	Abrojo			1								1		8, 38, 74, 75, 81, 101, 122, 124
Asteraceae	Xenophyllum poposa (Phil.) V.A.Funk	Poposa, Pupusa											1		1, 2, 20, 41, 86
Asteraceae	Zinnia peruviana (L.) L.	Chinita, Chinita del campo, Clavelillo, Maiquisa, Muchacho			1			1					1	1	13, 33, 44, 46, 48, 124
Balanophoraceae	Lophophytum leandri Eichler	Escamosa, Flor de Piedra, Rompepiedras											1		47, 53, 65, 74, 75
Basellaceae	Anredera cordifolia (Ten.) Steenis	Etas, Hierba Santa, Papa santa, Zarza parrilla											1		41, 42, 47, 100, 110
Basellaceae	Ullucus tuberosus Caldas	Papa lisa, Papa verde	1										1		39, 42
Begoniaceae	Begonia cucullata Willd.	Agrial, Agrión											1		47, 53, 54, 74, 75
Berberidaceae	Berberis darwinii Hook.	Calafate, Michai, Michay, Rullin	1										1		21, 25, 28, 59, 60, 115
Berberidaceae	Berberis empetrifolia Lam.	Calafate, Calafatillo, Montenegro, Zarcilla	1										1		21, 63, 72, 115
Berberidaceae	Berberis ilicifolia L.f.		1					1							72, 115
Berberidaceae	Berberis lilloana Job	Palo Amarillo						1							61
Berberidaceae	Berberis microphylla G.Forst.	Calafate, Michai, Michay, Quebrachillo	1					1	1				1	1	16, 17, 18, 19, 21, 56, 57, 58, 59, 60, 63, 67, 72, 91, 115
Berberidaceae	Berberis ruscifolia Lam.	Chilca, Quebrachillo						1	1				1		33, 45, 67, 80
Berberidaceae	Berberis trigona Kunze ex Poepp. & Endl.	Calafate, Michay, Michay chileno	1										1		21
Betulaceae	Alnus acuminata Kunth	Aliso			1			1							13, 61
Bignoniaceae	Adenocalymma marginatum (Cham.) DC.							1					1		47, 48
Bignoniaceae	Amphilophium carolinae (Lindl.) L.G.Lohmann	Cancana, Lengua 'e vaca, Peine del diablo, Vaquita	1		1			1					1	1	4, 68, 76, 90, 103, 107, 111, 119, 124
Bignoniaceae	Cybistax antisyphilitica (Mart.) Mart.									1			1		74, 75
Bignoniaceae	Dolichandra cynanchoides Cham.	Mil hombres, Milhombres, Palo huasca, Sacha huasca, Zarzaparrilla						1		1			1	1	6, 33, 34, 64, 65, 68, 76, 81, 103, 107
Bignoniaceae	Dolichandra quadrivalvis (Jacq.) L.G.Lohmann							1							68
Bignoniaceae	Dolichandra uncata (Andrews) L.G.Lohmann							1		1			1		47, 68, 107
Bignoniaceae	Dolichandra unguis-cati (L.) L.G.Lohmann	Bignonia, Garra de gato, Uña de gato						1					1		35, 41, 42, 53, 54, 61, 75
Bignoniaceae	Fridericia chica (Bonpl.) L.G.Lohmann							1							47, 49
Bignoniaceae	Fridericia mutabilis (Bureau & K.Schum.) Frazão & L.G.Lohmann												1		47, 75
Bignoniaceae	Handroanthus albus (Cham.) Mattos								1						47
Bignoniaceae	Handroanthus chrysotrichus (Mart. ex A.DC.) Mattos												1		107
Bignoniaceae	Handroanthus heptaphyllus (Vell.) Mattos	Lapacho, Lapacho morado, Lapacho negro						1	1	1			1		35, 47, 48, 53, 54, 74, 75
Bignoniaceae	Handroanthus impetiginosus (Mart. ex DC.) Mattos	Lapacho, Lapacho morado						1					1		42, 43, 76, 105, 120
Bignoniaceae	Handroanthus lapacho (K.Schum.) S.Grose	Lapacho amarillo											1		42
Bignoniaceae	Handroanthus pulcherrimus (Sandwith) S.Grose								1						47
Bignoniaceae	Jacaranda micrantha Cham.	Caroba							1				1		47, 53, 54, 75
Bignoniaceae	Jacaranda mimosifolia D.Don	Jacarandá, Tarco						1					1	1	42, 61, 102
Bignoniaceae	Jacaranda puberula Cham.												1		75
Bignoniaceae	Mansoa difficilis (Cham.) Bureau & K.Schum.							1							48
Bignoniaceae	Pyrostegia venusta (Ker Gawl.) Miers	Sipo San Juan						1					1		48, 53
Bignoniaceae	Tabebuia nodosa (Griseb.) Griseb.	Huiñaj, Lapacho, Palo cruz, Palo anto			1			1	1	1			1	1	5, 45, 64, 65, 68, 69, 76, 82, 103, 105, 110, 111, 112, 114
Bignoniaceae	Tanaecium dichotomum (Jacq.) Kaehler & L.G.Lohmann	Bejuco			1			1	1	1					5, 68, 76, 111, 112, 114
Bignoniaceae	Tecoma fulva (Cav.) D.Don	Guaranguay			1										13
Bignoniaceae	Tecoma stans (L.) Juss. ex Kunth	Guarán, Guaran guay, Guaranguay						1					1		1, 41, 42, 61
Bixaceae	Bixa orellana L.	Achiote		1				1							49, 90
Blechnaceae	Austroblechnum penna-marina (Poir.) Gasper & V.A.O.Dittrich	Punque											1		58, 88
Blechnaceae	Blechnum auriculatum Cav.									1			1		75
Blechnaceae	Parablechnum cordatum (Desv.) Gasper & Salino	Costilla de vaca											1		21
Boraginaceae	Amsinckia calycina (Moris) Chater												1		21
Boraginaceae	Cordia americana (L.) Gottschling & J.S.Mill.	Guayubira						1	1	1			1		22, 47, 48, 49, 50, 52, 68, 73, 75, 76
Boraginaceae	Cordia ecalyculata Vell.							1	1				1	1	47, 48
Boraginaceae	Cordia trichotoma (Vell.) Arráb. ex Steud.							1	1				1		47, 48, 75
Boraginaceae	Euploca procumbens (Mill.) Diane & Hilger	Cola de gama			1								1		105, 110
Boraginaceae	Heliotropium amplexicaule Vahl	Borraja, Heliotropo cimarrón, Yerba meona			1								1		8, 9, 33, 86, 122, 124
Boraginaceae	Heliotropium curassavicum L.	Cola de gama, Heliotropium			1					1			1		8, 30, 65, 74, 103, 105, 107, 118
Boraginaceae	Heliotropium elongatum Hoffm. ex Roem. & Schult.	Borraja del campo, Kururu ka'a											1		100, 110
Boraginaceae	Heliotropium lilloi (I.M.Johnst.) Luebert	Alcanfor											1		42
Boraginaceae	Heliotropium phylicoides Cham.												1		75
Boraginaceae	Heliotropium transalpinum Vell.	Jabón de soldado											1		53
Boraginaceae	Myriopus paniculatus (Cham.) Feuillet	Alcanfor											1		42
Boraginaceae	Myriopus salzmannii (DC.) Diane & Hilger									1					68, 76
Boraginaceae	Nama undulatum Kunth	Matagusano, Yerba del zorro			1							1	1		9, 33, 122, 124
Boraginaceae	Phacelia pinnatifida Griseb. ex Wedd.	Yerba meona											1		32, 64, 65, 81, 84, 123
Boraginaceae	Phacelia secunda J.F.Gmel.	Yerba de la vida											1		41, 88
Boraginaceae	Varronia curassavica Jacq.	María negra											1		74, 100
Brassicaceae	Descurainia antarctica (E.Fourn.) O.E.Schulz		1												72
Brassicaceae	Lepidium auriculatum Regel & Körn.	Mascuarcito, Mastuerzo											1		37, 74, 100
Brassicaceae	Lepidium bonariense L.	Bolsa de pastor, Mastuerzo								1			1		9, 33, 71, 74
Brassicaceae	Lepidium didymum L.	Mentruz, Mintruiz, Mintruz, Mistruiz, Quimpe, Quimpy, Yerba del zorrino	1							1			1		1, 9, 12, 20, 32, 41, 42, 53, 54, 55, 64, 65, 71, 74, 76, 84, 86, 101, 107, 110, 113, 116, 119
Brassicaceae	Lepidium meyenii Walp.	Maca, Macaia, Papa macaia											1		42, 64, 65, 67
Bromeliaceae	Aechmea calyculata (E.Morren) Baker													1	51
Bromeliaceae	Aechmea distichantha Lem.	Choclo, Fruto choclo, Taraca	1					1					1	1	39, 42, 51, 68, 69, 74, 76, 82, 106
Bromeliaceae	Billbergia nutans H.Wendl. ex Regel													1	51
Bromeliaceae	Billbergia zebrina (Herb.) Lindl.													1	51
Bromeliaceae	Bromelia balansae Mez	Caraguatá	1					1					1		48, 50, 53, 68, 69, 73, 74, 75
Bromeliaceae	Bromelia hieronymi Mez	Cardo, Chaguar, Cháguar	1		1			1		1			1	1	4, 90, 105, 106, 111, 112, 114, 119
Bromeliaceae	Bromelia serra Griseb.	Cardo, Chaguar, Chaguar de vaca	1		1			1					1	1	4, 30, 68, 69, 74, 76, 90, 105, 106, 111
Bromeliaceae	Deinacanthon urbanianum (Mez) Mez	Chaguar chiquito, Chaguarcillo, Chaguarillo	1					1					1	1	11, 105, 112, 119
Bromeliaceae	Dyckia floribunda Griseb.	Chaguar, Penca de las piedras			1										46, 124
Bromeliaceae	Dyckia longipetala Baker	Chaguar			1										46
Bromeliaceae	Pseudananas sagenarius (Arruda) Camargo		1					1							68, 73, 75
Bromeliaceae	Puya spathacea (Griseb.) Mez	Chaguar			1										46
Bromeliaceae	Puya yakespala A.Cast.	Yasquispala			1										13
Bromeliaceae	Tillandsia aëranthos (Loisel.) L.B.Sm.												1		68
Bromeliaceae	Tillandsia aizoides Mez	Suelda			1										124
Bromeliaceae	Tillandsia argentina C.H.Wright	Azahar			1										46
Bromeliaceae	Tillandsia australis Mez	Payo			1								1		13, 42
Bromeliaceae	Tillandsia capillaris Ruiz & Pav.	Clavel del aire, Suelda			1								1		44, 46, 124
Bromeliaceae	Tillandsia duratii Vis.	Azahar, Azahar morado, Chasca, Clavel del aire, Flor del aire, Sajasta, Suelda	1		1					1			1		9, 34, 46, 68, 105, 111, 113, 119, 122, 124
Bromeliaceae	Tillandsia funebris A.Cast.	Sajasta								1			1		119
Bromeliaceae	Tillandsia ixioides Griseb.	Azahar			1										46
Bromeliaceae	Tillandsia loliacea Mart. ex Schult.f.	Chasca			1								1		110, 111
Bromeliaceae	Tillandsia lorentziana Griseb.	Azahar			1										46
Bromeliaceae	Tillandsia meridionalis Baker	Chasca			1					1			1		30, 74, 110, 111
Bromeliaceae	Tillandsia minutiflora Donadío	Clavel del aire, Flor del aire			1										46
Bromeliaceae	Tillandsia pedicellata (Mez) A.Cast.	Clavel del aire											1		44
Bromeliaceae	Tillandsia recurvata (L.) L.	Clavel del aire											1	1	44, 51, 74
Bromeliaceae	Tillandsia recurvifolia Hook.	Sajasta								1			1		119
Bromeliaceae	Tillandsia streptocarpa Baker	Chasca, Sajasta			1					1			1		30, 110, 111, 119
Bromeliaceae	Tillandsia stricta Sol. ex Sims													1	51
Bromeliaceae	Tillandsia tenuifolia L.	Taraca			1									1	13, 51
Bromeliaceae	Tillandsia tricholepis Baker	Clavel del aire			1								1		93, 105
Bromeliaceae	Tillandsia usneoides (L.) L.	Sacha blanca						1					1		42, 61
Bromeliaceae	Tillandsia xiphioides Ker Gawl.	Azahar, Azahar blanco			1										46, 105
Bromeliaceae	Vriesea friburgensis Mez	Payo											1	1	42, 51
Bromeliaceae	Vriesea platynema Gaudich.													1	51
Cabombaceae	Cabomba caroliniana A.Gray													1	82
Cactaceae	Acanthocalycium spiniflorum (K.Schum.) Backeb.	Penca			1										124
Cactaceae	Airampoa ayrampo (Azara) Doweld	Airampo											1		1, 41, 42
Cactaceae	Austrocactus patagonicus (F.A.C.Weber) Hosseus	Tuna	1												58
Cactaceae	Brasiliopuntia brasiliensis (Willd.) A.Berger		1										1		73, 75
Cactaceae	Cereus aethiops Haw.	Cardoncito, Penca, Tuna de cerro	1										1		11, 93
Cactaceae	Cereus argentinensis Britton & Rose✤		1										1		68, 69, 74, 76
Cactaceae	Cereus forbesii Otto ex C.F.Först.	Cacto de San Juan, Cardón, Ucle, Ucli	1		1			1		1			1	1	4, 7, 11, 34, 46, 76, 85, 90, 103, 105, 106, 107, 108, 111, 114
Cactaceae	Cereus stenogonus K.Schum.	Tuna, Ucle	1					1					1	1	47, 48, 49, 53, 75, 76, 82
Cactaceae	Cereus uruguayanus R.Kiesling		1												68, 69, 73
Cactaceae	Cleistocactus baumannii (Lem.) Lem.	Bola de gato, Chuli, Cola de león, Huevo de gato, Ulvincha, Ushivincha	1		1					1			1	1	4, 46, 68, 69, 74, 76, 85, 90, 103, 105, 106, 108, 113, 114
Cactaceae	Cleistocactus smaragdiflorus (F.A.C.Weber) Britton & Rose	Alaba, Cola de zorro			1										46
Cactaceae	Echinopsis aurea Britton & Rose	Machocorota, Machocorote			1										46
Cactaceae	Echinopsis leucantha (Gillies ex Salm-Dyck) Walp.✤	Uclecito	1												11
Cactaceae	Echinopsis rhodotricha K.Schum.		1							1			1		4, 68, 69, 113, 114
Cactaceae	Gymnocalycium mihanovichii (Fric ex Gürke) Britton & Rose	Cardón santo											1		110
Cactaceae	Gymnocalycium ochoterenae Backeb.	Penca			1										124
Cactaceae	Gymnocalycium saglionis (Cels) Britton & Rose✤	Asiento de suegra, Uclecito redondo	1												11
Cactaceae	Harrisia bonplandii (Pfeiff.) Britton & Rose	Pascana, Ulúa	1		1					1			1		4, 68, 111, 114, 119
Cactaceae	Harrisia martinii (Labour.) Britton		1												68, 69, 76
Cactaceae	Harrisia pomanensis (F.A.C.Weber ex K.Schum.) Britton & Rose	Pasacana, Ulúa, Uluba, Ulva	1		1								1		7, 46, 90, 105, 108, 119
Cactaceae	Maihuenia patagonica (Phil.) Britton & Rose	Chupasangre, Tuna							1				1		28, 89, 91
Cactaceae	Maihueniopsis darwinii (Hensl.) F.Ritter	Chupasangre, Quisque del choique, Tuna	1	1									1		18, 56, 57, 58, 63, 115, 118
Cactaceae	Monvillea cavendischii (Monv.) Britton & Rose		1							1			1		74, 106, 107
Cactaceae	Monvillea spegazzinii (F.A.C.Weber) Britton & Rose		1						1	1			1		4, 5, 90, 113, 114, 119
Cactaceae	Opuntia aff. stenarthra K.Schum.		1										1		68, 69
Cactaceae	Opuntia anacantha Speg.	Penca, Quishcaloro, Tunilla 'e perro	1		1									1	4, 68, 69, 76, 90, 103, 105, 106, 111
Cactaceae	Opuntia arechavaletae Speg.	Tuna	1					1						1	48, 49, 55
Cactaceae	Opuntia bonaerensis Speg.✤		1										1		71
Cactaceae	Opuntia colubrina A.Cast.		1												106
Cactaceae	Opuntia discolor Britton & Rose		1												106
Cactaceae	Opuntia elata Salm-Dyck	Tuna de perro, Tunilla, Tunilla de perro	1	1						1			1		4, 30, 68, 76, 82, 90, 106, 110, 112, 114
Cactaceae	Opuntia megapotamica Arechav.	Penca, Penca belenista, Tuna	1		1									1	46, 118
Cactaceae	Opuntia quimilo K.Schum.	Quimil, Quimilo	1		1					1	1		1		4, 76, 83, 102, 103, 105, 107, 108, 109, 110, 111, 114, 119
Cactaceae	Opuntia salmiana J.Parm. ex Pfeiff.	Cola de león, Penca del perro			1					1				1	46, 103, 114
Cactaceae	Opuntia sulphurea Gillies ex Salm-Dyck	Penca, Penca del burro, Penca tunillita, Kiska-loro, Quiscaloro, Quiscaludo, Quishcaloro, Tuna, Tuna colorada, Tuna de monte, Tunilla	1		1					1			1	1	4, 7, 11, 29, 34, 46, 81, 90, 94, 108, 111, 114, 116, 118, 124
Cactaceae	Parodia sp.		1												68
Cactaceae	Pterocactus tuberosus (Pfeiff.) Britton & Rose	Cola de piche		1											118
Cactaceae	Pyrrhocactus strausianus (K.Schum.) A.Berger✤	Tuna	1												57
Cactaceae	Quiabentia verticillata (Vaupel) Borg	Sacha rosa			1								1		110, 111, 113, 119
Cactaceae	Rhipsalis aculeata F.A.C.Weber		1												68
Cactaceae	Rhipsalis floccosa Pfeiff.	Calaguala, Huasca huasca, Rienda rienda											1		41, 42
Cactaceae	Rhipsalis lorentziana Griseb.	Huasca huasca, Peinquillita											1		42
Cactaceae	Rhipsalis lumbricoides (Lem.) Lem. ex Salm-Dyck		1										1		68, 73, 74, 75, 107
Cactaceae	Selenicereus setaceus (Salm-Dyck ex DC.) Werderm.		1												68, 69
Cactaceae	Stetsonia coryne (Salm-Dyck) Britton & Rose	Cardón, Cardón moro	1	1	1			1	1	1			1		4, 5, 11, 76, 80, 85, 90, 106, 110, 111, 112, 113, 114
Cactaceae	Trichocereus arboricola Kimnach	Cardón, Cardón blanco											1		42
Cactaceae	Trichocereus atacamensis (Phil.) W.T.Marshall & T.M.Bock	Cardón											1		116
Cactaceae	Trichocereus terscheckii (J.Parm. ex Pfeiff.) Britton & Rose	Achuma, Cardón			1			1					1		15, 46, 83
Cactaceae	Trichocereus thelegonoides (Speg.) Britton & Rose	Penca												1	105
Calceolariaceae	Calceolaria filicaulis Clos	Cohete											1		58
Calceolariaceae	Calceolaria schickendantziana Kraenzl.	Zapatilla											1		44
Calceolariaceae	Calceolaria uniflora Lam.												1		89
Calyceraceae	Acicarpha tribuloides Juss.												1		74
Calyceraceae	Calycera herbacea Cav.	Bailabién											1		67
Calyceraceae	Gamocarpha australis (Decne.) S.S.Denham & Pozner		1												72, 115
Calyceraceae	Gamocarpha selliana Reiche	Pata de williñb											1		89
Campanulaceae	Lobelia hassleri Zahlbr.												1		47
Cannabaceae	Celtis chichape (Wedd.) Miq.	Churqui tala, Tala, Tala pispita	1		1			1	1				1		34, 76, 90, 106, 107, 109, 110, 111, 112, 119
Cannabaceae	Celtis group (Celtis tala Gillies ex Planch. + Celtis pallida Torr.)	Tala, Tala churqui, Tala colorada, Tala común, Tala pispa, Tala pispito, Tala rosada, Talilla	1		1			1	1				1	1	4, 7, 8, 9, 11, 15, 20, 23, 29, 32, 33, 34, 37, 46, 64, 74, 77, 79, 80, 81, 84, 85, 87, 100, 102, 103, 105, 108, 116, 117, 122, 123
Cannabaceae	Celtis iguanaea (Jacq.) Sarg.	Horco tala, Tala, Tala guiador, Tala guiadora, Tala macho	1		1			1	1	1			1	1	1, 4, 13, 39, 42, 45, 46, 47, 54, 55, 68, 69, 73, 74, 75, 76, 90, 100, 106, 111, 112, 114, 119, 124
Cannabaceae	Celtis spinosa Spreng.		1										1		68, 69, 74
Cannabaceae	Trema micrantha (L.) Blume								1				1		47, 75
Cannaceae	Canna glauca L.	Achira	1										1	1	26, 33, 76, 82
Cannaceae	Canna indica L.	Achera, Achera mana, Achira, Achira nativa	1		1			1		1			1		23, 36, 39, 42, 46, 48, 68, 69, 74, 75, 76
Cannaceae	Canna paniculata Ruiz & Pav.							1							48
Capparaceae	Anisocapparis speciosa (Griseb.) Cornejo & H.HIltis	Bola verde, Iltis, Palo amargo, Palo verde, Sacha limón, Sacha naranja	1		1			1	1	1	1		1		4, 5, 68, 76, 90, 105, 106, 109, 110, 111, 112, 113, 114, 119
Capparaceae	Atamisquea emarginata Miers ex Hook. & Arn.	Atamishky, Atamiski, Atamisque, Atamisqui, Matagusano, Matanegra			1	1					1		1		8, 9, 20, 33, 34, 65, 76, 81, 85, 87, 93, 102, 103, 105, 107, 110, 111, 116, 118, 122, 124
Capparaceae	Capparicordis tweediana (Eichler) H.H.Iltis & Cornejo	Hierba de la comadreja, Hoja redonda, Mata burro, Oreja redonda, Palo comadreja, Sacha membrillo	1		1				1	1	1		1		4, 5, 30, 68, 76, 78, 90, 105, 107, 109, 110, 111, 113, 114, 119
Capparaceae	Crateva tapia L.		1												68, 69
Capparaceae	Cynophalla flexuosa (L.) J.Presl		1												68, 69, 76
Capparaceae	Cynophalla retusa (Griseb.) Cornejo & H.H.Iltis	Cocol, Cocol de hoja redonda, Poroto del monte, Sacha poroto	1		1				1		1		1		4, 5, 68, 69, 76, 90, 105, 106, 107, 111
Capparaceae	Dactylaena pauciflora Griseb.												1		119
Capparaceae	Sarcotoxicum salicifolium (Griseb.) Cornejo & H.H.Iltis	Sacha mamita, Sacha sandía	1		1				1	1	1		1		4, 5, 30, 76, 90, 105, 110, 111, 113, 114
Caprifoliaceae	Valeriana carnosa Sm.	Ñamkulawenb, Ñanco lahuen, Ñanculahuén											1		24, 25, 27, 28, 58, 63, 88, 89, 97, 115, 121
Caprifoliaceae	Valeriana clarionifolia Phil.	Ñamkulawenb											1		89
Caprifoliaceae	Valeriana lapathifolia Vahl	Valeriana											1		21
Caprifoliaceae	Valeriana polybotrya (Griseb.) Höck	Valeriana											1		33
Cardiopteridaceae	Citronella gongonha (Mart.) R.A.Howard		1												73, 75
Cardiopteridaceae	Citronella paniculata (Mart.) R.A.Howard								1						47
Caricaceae	Jacaratia corumbensis Kuntze	Alpa sandía, Yacón	1												4, 82, 90
Caricaceae	Jacaratia spinosa (Aubl.) A.DC.	Mamón del monte, Yacarati'a	1												55, 73, 75
Caricaceae	Vasconcellea quercifolia A.St.-Hil.	Higo amarillo, Higuera del monte	1												39, 68, 69, 73, 75, 106
Caryophyllaceae	Arenaria lanuginosa (Michx.) Rohrb.	Arenaria											1		33
Caryophyllaceae	Augustea suffruticosa (Griseb.) Iamonico	Helecho del campo, Helecho chinito, Ruda del campo			1								1		46, 110
Caryophyllaceae	Cardionema ramosissima (Weinm.) A.Nelson & J.F.Macbr.												1		33, 74
Caryophyllaceae	Colobanthus cf. lycopodioides Griseb.												1		115
Caryophyllaceae	Drymaria glandulosa Bartl.												1		74
Caryophyllaceae	Paronychia chilensis DC.	Sangrenaria, Sanguinaria											1		41
Caryophyllaceae	Pycnophyllum bryoides (Phil.) Rohrb.	Yaretilla											1		44
Caryophyllaceae	Spergula ramosa (Cambess.) D.Dietr.												1		71
Celastraceae	Maytenus boaria Molina	Anacahuita, Maitén, Maytén	1										1	1	21, 25, 27, 33, 58, 60, 63, 64, 89, 97, 121
Celastraceae	Maytenus chubutensis (Speg.) Lourteig, O'Donell & Sleumer												1		88
Celastraceae	Maytenus magellanica (Lam.) Hook.f.							1							72
Celastraceae	Maytenus verticillata (Ruiz & Pav.) DC.	lloque											1		42
Celastraceae	Maytenus viscifolia Griseb.	Sombra de toro											1		20, 116
Celastraceae	Maytenus vitis-idaea Griseb.	Ckoscke yuyo, Coike yuyo, Coikeyuyo, Cosque yuyo, Palta, Sal de indio, Yuyo de la moneda	1	1	1				1				1		4, 85, 103, 105, 106, 110, 111, 119
Celastraceae	Monteverdia ilicifolia (Mart. ex Reissek) Biral	Cangorosa, Congorosa, Kangorosa		1					1	1			1		38, 47, 53, 54, 64, 65, 68, 74, 75, 76, 100
Celastraceae	Monteverdia spinosa (Griseb.) Biral	Abreboca, Abriboca, Molle abreboca, Molle chico			1			1	1				1		76, 103, 105, 107, 110, 113, 119, 120
Celastraceae	Pristimera celastroides (Kunth) A.C.Sm.												1		47
Ceratophyllaceae	Ceratophyllum demersum L.	Verdenoza			1										111
Cleomaceae	Tarenaya tucumanensis (H.H.Iltis) Arana & Oggero												1		119
Columelliaceae	Desfontainia spinosa Ruiz & Pav.	Taique											1		21
Combretaceae	Combretum fruticosum (Loefl.) Stuntz		1										1		73, 75
Combretaceae	Terminalia triflora (Griseb.) Lillo							1							75
Commelinaceae	Commelina diffusa Burm.f.	Lágrima de virgen											1		36
Commelinaceae	Commelina erecta L.	Flor de Santa Lucía, Santa Lucía	1		1					1			1		9, 23, 30, 33, 42, 54, 64, 67, 68, 71, 74, 75, 76, 81, 84, 100, 107, 110, 111, 119, 122, 123, 124
Commelinaceae	Commelina platyphylla Klotzsch ex Seub.												1		74
Commelinaceae	Commelina tuberosa L.	Santa Lucía											1		44
Commelinaceae	Dichorisandra hexandra (Aubl.) Standl.												1	1	47, 75
Commelinaceae	Tradescantia fluminensis Vell.												1		74, 75
Commelinaceae	Tripogandra glandulosa (Seub.) Rohweder												1		74
Convolvulaceae	Cuscuta grandiflora Kunth	Yerba sin raíz								1			1		41
Convolvulaceae	Cuscuta obtusiflora Kunth												1		74
Convolvulaceae	Cuscuta platyloba Progel												1		74
Convolvulaceae	Dichondra microcalyx (Hallier f.) Fabris	Oreja de ratón											1		33, 69, 74, 76, 107
Convolvulaceae	Dichondra sericea Sw.	Oreja de gato, Oreja de ratón											1		33, 95, 100, 103, 104
Convolvulaceae	Distimake dissectus (Jacq.) Simões & Staples		1							1					4, 114
Convolvulaceae	Evolvulus sericeus Sw.							1							73, 75
Convolvulaceae	Ipomoea bonariensis Hook.		1												76
Convolvulaceae	Ipomoea cairica (L.) Sweet	Campanita azul												1	34
Convolvulaceae	Ipomoea carnea Jacq.	Mandiyona								1			1	1	30, 68, 69, 74, 76, 109, 110, 119
Convolvulaceae	Ipomoea cheirophylla O'Donell												1		119
Convolvulaceae	Ipomoea hieronymi (Kuntze) O'Donell	Campanilla											1		33
Convolvulaceae	Ipomoea indica (Burm.) Merr.									1					68
Convolvulaceae	Ipomoea nil (L.) Roth									1					68
Convolvulaceae	Ipomoea plummerae A.Gray	Culima, Culina	1												66
Convolvulaceae	Ipomoea purpurea (L.) Roth	Campanilla, Porotillo, Suspiro			1								1		32, 46
Coriariaceae	Coriaria ruscifolia L.	Deu											1		58
Cucurbitaceae	Cayaponia bonariensis (Mill.) Mart.Crov.												1		47, 75
Cucurbitaceae	Cayaponia citrullifolia (Griseb.) Cogn. ex Griseb.	Sandía de la víbora			1								1		9, 74, 122, 124
Cucurbitaceae	Cayaponia podantha Cogn.												1		68, 76
Cucurbitaceae	Cucurbita maxima Duchesne	Guinea, Zapallito verde, Zapallo, Zapallo criollo	1		1								1		1, 39, 42, 46, 47, 53, 71, 74, 75, 76, 94, 105, 106, 110, 112, 118, 122
Cucurbitaceae	Cucurbitella asperata (Gillies ex Hook. & Arn.) Walp.												1		30
Cucurbitaceae	Cyclanthera hystrix (Gillies) Arn.		1												73, 75
Cucurbitaceae	Cyclanthera tenuisepala Cogn.	Pepinillo, Pepinito, Pepinito del monte	1												55
Cucurbitaceae	Melothria cucumis Vell.		1										1		47, 73, 75
Cucurbitaceae	Melothria warmingii Cogn.		1												73, 75
Cucurbitaceae	Wilbrandia ebracteata Cogn.												1		75
Cupressaceae	Austrocedrus chilensis (D.Don) Pic.Serm. & Bizzarri	Ciprés, Ciprés de la cordillera							1				1	1	10, 21, 26, 58, 121
Cyperaceae	Abildgaardia ovata (Burm.f.) Kral												1		68, 75
Cyperaceae	Androtrichum giganteum (Kunth) H.Pfeiff.												1		74
Cyperaceae	Bulbostylis capillaris (L.) C.B.Clarke	Bulbostylis								1			1		33, 76
Cyperaceae	Bulbostylis juncoides (Vahl) Kük. & Herter							1							48, 75
Cyperaceae	Cyperus corymbosus Rottb.	Pasto colorado			1										46
Cyperaceae	Cyperus entrerianus Boeck.	Pasto cebollita			1			1		1					30, 75, 111
Cyperaceae	Cyperus friburgensis Boeck.	Yunga yunga											1		41
Cyperaceae	Cyperus giganteus Vahl							1					1		68, 69, 74, 76
Cyperaceae	Cyperus haspan L.	Pasto “natural”			1										46
Cyperaceae	Cyperus luzulae (L.) Rottb. ex Retz.												1		68
Cyperaceae	Cyperus niger Ruiz & Pav.	Paja			1										46
Cyperaceae	Cyperus sesquiflorus (Torr.) Mattf. & Kük. ex Kük.	Capií-catí											1		33, 74, 75
Cyperaceae	Cyperus spectabilis Link	Cuatro cantos											1		41
Cyperaceae	Eleocharis bonariensis Nees												1		68
Cyperaceae	Eleocharis elegans (Kunth) Roem. & Schult.	Totora 'el agua			1										111
Cyperaceae	Rhynchospora cf. rugosa (Vahl) Gale	Pasto			1										46
Cyperaceae	Rhynchospora corymbosa (L.) Britton							1							76
Cyperaceae	Schoenoplectus americanus (Pers.) Volkart ex Schinz & R.Keller	Junco						1							118
Cyperaceae	Schoenoplectus californicus (C.A.Mey.) Soják	Junco, Junco de laguna	1					1							68, 71, 76, 115, 118
Dennstaedtiaceae	Hypolepis poeppigii (Kunze) R.Rodr.	Ala de cuervo, Helecho						1					1		41, 42, 61
Dennstaedtiaceae	Pteridium esculentum (G.Forst.) Cockayne	Ala de cuervo, Helecho macho, Samambáia									1		1		14, 53, 64
Dioscoreaceae	Dioscorea aff. multiflora Mart. ex Griseb.		1												73
Dioscoreaceae	Dioscorea microbotrya Griseb.	Iaco, Yaco	1										1		82, 105
Dioscoreaceae	Dioscorea sinuata Vell.		1												73
Dryopteridaceae	Elaphoglossum gayanum (Fée) T.Moore	Calaguala, Helecho macho								1			1		9, 32, 33, 64, 65, 67, 81, 122
Dryopteridaceae	Polystichum montevidense (Spreng.) Rosenst.	Helecho macho, Helecho pinito											1		44, 64, 65
Dryopteridaceae	Polystichum pycnolepis (Kunze ex Klotzsch) Hieron.	Ala de cuervo											1		41
Elaeocarpaceae	Aristotelia chilensis (Molina) Stuntz	Makeb, Maqui	1										1		21, 28, 58, 59, 60, 63, 88, 89, 121
Ephedraceae	Ephedra americana Humb. & Bonpl. ex Willd.	Pico de loro, Pinco, Pingo, Tramontana			1				1				1		3, 13, 33, 64, 65
Ephedraceae	Ephedra cf. americana Humb. & Bonpl. ex Willd.	Solupe	1		1										62
Ephedraceae	Ephedra chilensis C.Presl	Epegra, Solupe, Sulupe											1		21, 63, 97
Ephedraceae	Ephedra ochreata Miers	Cuparra, Efedra, Pico de loro, Silupe, Solupe, Solupe frutero, Sulupe rojo, Tramontana	1		1				1				1		21, 57, 58, 59, 62, 84, 91, 92, 93, 94, 95, 96, 104, 118
Ephedraceae	Ephedra triandra Tul. emend. J.H.Hunz.	Efedra, Pez de Castilla, Pico de gallo, Pico de loro, Solupe, Tramontana	1		1					1			1		9, 12, 20, 62, 64, 65, 67, 76, 81, 84, 87, 105, 107, 116, 118, 122, 123, 124
Ephedraceae	Ephedra tweediana Fisch. & C.A.Mey. emend. J.H.Hunz.	Pico de gallo, Pico de loro, Tramontana			1								1		46, 103
Equisetaceae	Equisetum bogotense Kunth	Cola de caballo, Cola de caballo chica, Limpia plata, Limpiaplata											1		21, 24, 25, 27, 41, 42, 44, 58, 63, 74, 88, 89, 97, 121
Equisetaceae	Equisetum giganteum L.	Cola de caballo, Cola de caballo grande, Yerba de la plata											1		1, 2, 8, 9, 12, 20, 23, 32, 33, 36, 37, 38, 41, 42, 44, 47, 53, 58, 63, 64, 65, 67, 68, 74, 76, 77, 81, 83, 84, 86, 87, 93, 95, 100, 110, 116, 122, 123, 124
Ericaceae	Empetrum rubrum Vahl ex Willd.	Mutilla	1												57, 58, 63, 72, 115
Ericaceae	Gaultheria mucronata (L.f.) Hook. & Arn.	Chaura	1							1					21, 72, 115
Ericaceae	Gaultheria myrsinoides Kunth	Juvilla, Uvilla									1				14
Ericaceae	Gaultheria poeppigii DC.	Manzanita del campo	1												60
Ericaceae	Gaultheria pumila (L.f.) D.J.Middleton		1												72, 115
Erythroxylaceae	Erythroxylum argentinum O.E.Schulz	Ají de paloma, Ají de zorro, Avilla, Cantospie, Rajadilla, Rajilla							1						45
Erythroxylaceae	Erythroxylum cuneifolium (Mart.) O.E.Schulz	Coca 'el monte			1										111
Erythroxylaceae	Erythroxylum deciduum A.St.-Hil.							1	1						47, 48
Escalloniaceae	Escallonia megapotamica Spreng.	Chachacoma											1		41, 42
Escalloniaceae	Escallonia virgata (Ruiz & Pav.) Pers.												1		88
Euphorbiaceae	Acalypha communis Müll.Arg.	Albahaquilla, Albahaquilla del campo, Albaquilla, Curabichera											1		9, 81, 84, 123
Euphorbiaceae	Actinostemon concolor (Spreng.) Müll.Arg.	Laranjeira						1					1		48, 53, 75
Euphorbiaceae	Cnidoscolus albomaculatus (Pax) I.M.Johnst.	Ortiguilla			1					1			1		75, 111, 113, 114
Euphorbiaceae	Cnidoscolus loasoides (Pax) I.M.Johnst.												1		74
Euphorbiaceae	Cnidoscolus urens (L.) Arthur	Ya te veo			1										46
Euphorbiaceae	Colliguaja integerrima Gillies & Hook.	Coliguay, Duraznillo							1				1	1	16, 17, 21, 27
Euphorbiaceae	Croton argenteus L.	Pulmonaria											1		12, 67, 68, 74, 76, 77
Euphorbiaceae	Croton argentinus Müll.Arg.	Cachamai, Cachamay, Cambalache, Cambalacho											1		12, 64, 65, 81
Euphorbiaceae	Croton bonplandianus Baill.	Escoba negra, Paloma micuna, Paloma yuyo			1					1			1		68, 69, 74, 105, 110, 114
Euphorbiaceae	Croton glandulosus L.	Canilla puntá											1		100
Euphorbiaceae	Croton hieronymi Griseb.	Poleo del monte											1		110, 119
Euphorbiaceae	Croton lachnostachyus Baill.	Bálsamo, Cambalacho, Cola de quirquincho, Tinajera			1			1					1		9, 46, 68, 76, 79, 105, 107, 122, 124
Euphorbiaceae	Croton lanatus Lam.	Cambalache											1		83
Euphorbiaceae	Croton parvifolius Müll.Arg.	Incayuyo, Sanalotodo, Yerba del venado											1		12, 33, 123
Euphorbiaceae	Croton serratifolius Baill.	Boldo serrano											1		65, 81
Euphorbiaceae	Croton subpannosus Müll.Arg. ex Griseb.	Asma, Pulmonaria, Pulmonaria blanca, Pulmonaria hoja chica											1		32, 33, 64, 65, 81, 84, 123
Euphorbiaceae	Croton urucurana Baill.												1		74, 75
Euphorbiaceae	Euphorbia collina Phil.	Lechuguilla, Pechuguilla, Pichoa, Pichoga, Pichona									1		1		21, 58, 89, 92, 93
Euphorbiaceae	Euphorbia lasiocarpa Klotzsch	Leche de golondrina, Yerba de la golondrina, Yerba meona rastreadora											1		81
Euphorbiaceae	Euphorbia papillosa A.St.-Hil.							1					1		74, 75
Euphorbiaceae	Euphorbia portulacoides L.	Mil hombres, Pichoga								1			1		30, 63, 115
Euphorbiaceae	Euphorbia prostrata Aiton	Flor de araña											1		44
Euphorbiaceae	Euphorbia schickendantzii Hieron.	Pechuguilla, Pichoa									1		1		95, 118
Euphorbiaceae	Euphorbia sciadophila Boiss.												1		47
Euphorbiaceae	Euphorbia selloi (Klotzsch & Garcke) Boiss.	Yerba de la vida											1		74, 100, 107
Euphorbiaceae	Euphorbia serpens Kunth	China meona, Hierba meona, Leche de golondrina, Santa María, Yerba de la golondrina, Yerba 'e la golondrina, Yerba meona, Yerba meona rastreadora			1			1					1		9, 12, 30, 35, 36, 43, 65, 68, 71, 74, 75, 76, 81, 100, 101, 103, 105, 107, 110, 111, 113, 119, 122
Euphorbiaceae	Jatropha grossidentata Pax & K.Hoffm.									1					78
Euphorbiaceae	Jatropha hieronymi Kuntze	Pelamano, Piñón											1		109, 110
Euphorbiaceae	Jatropha isabelliae Müll.Arg.	Jagua nambi											1		100
Euphorbiaceae	Jatropha macrocarpa Griseb.	Higuera del zorro, Piñón						1							80
Euphorbiaceae	Jatropha pedersenii Lourteig												1		74
Euphorbiaceae	Manihot grahamii Hook.	Café del campo							1		1		1		47, 75, 79
Euphorbiaceae	Manihot guaranitica Chodat & Hassl.	Mandioca 'el monte			1					1			1		111, 114, 119
Euphorbiaceae	Sapium glandulosum (L.) Morong	Lecherón						1					1		47, 61, 75
Euphorbiaceae	Sapium haematospermum Müll.Arg.	Curupí, Kurupí, Lecherón, Lechico, Palo leche, Punúa Kurupyka’y						1	1	1	1	1	1	1	5, 6, 22, 30, 33, 68, 74, 75, 76, 80, 82, 98, 100, 107, 109, 110, 112, 113, 114, 119, 120
Euphorbiaceae	Sebastiania brasiliensis Spreng.							1					1		47, 75
Euphorbiaceae	Sebastiania commersoniana (Baill.) L.B.Sm. & Downs							1	1						47, 48, 52
Euphorbiaceae	Spegazziniophytum patagonicum (Speg.) Esser	Bolo picante, Mata perro, Mata de perro, Trintri lawenb							1				1		16, 17, 18, 89, 91, 95
Euphorbiaceae	Tragia geraniifolia Klotzsch ex Baill.	Raspaculo											1		33
Euphorbiaceae	Tragia hieronymii Pax & K.Hoffm.									1			1		113, 114
Euphorbiaceae	Tragia polyandra Vell.												1		47
Euphorbiaceae	Tragia volubilis L.												1		47, 105
Fabaceae	Adesmia boronioides Hook.f.	Paramela											1		21, 24, 25, 26, 27, 28, 58, 63, 88, 89, 95, 97, 104, 115, 121
Fabaceae	Adesmia cf. miraflorensis J.Remy	Añagua			1				1						66
Fabaceae	Adesmia horrida Gillies ex Hook. & Arn.	Añahua							1						3
Fabaceae	Adesmia inflexa Griseb.	Añagua											1		41
Fabaceae	Adesmia lotoides Hook.f.		1												72
Fabaceae	Adesmia minor (Hook. & Arn.) Burkart	Cuerno							1						3
Fabaceae	Adesmia muricata (Jacq.) DC.	Boca de pato			1										46
Fabaceae	Adesmia pinifolia Gillies ex Hook. & Arn.	Leña amarilla							1				1		62, 95
Fabaceae	Adesmia trijuga Gillies ex Hook. & Arn.	Añagua			1										14
Fabaceae	Adesmia volckmannii Phil.	Mamuel choique							1						16, 17, 91
Fabaceae	Aeschynomene rudis Benth.									1					68
Fabaceae	Albizia inundata (Mart.) Barneby & J.W.Grimes	Palo flojo			1					1			1		75, 111, 114, 119
Fabaceae	Albizia niopoides (Spruce ex Benth.) Burkart								1						47
Fabaceae	Amburana cearensis (Allemão) A.C.Sm.	Roble											1		42
Fabaceae	Anadenanthera colubrina (Vell.) Brenan	Cebil, Cébil, Cebil colorado, Sebil			1			1	1	1			1		42, 45, 46, 61, 80, 83, 114, 119, 120
Fabaceae	Anarthrophyllum rigidum (Gillies ex Hook. & Arn.) Hieron.	Colimamil, Patahuilla	1					1	1				1		62, 95, 115
Fabaceae	Apuleia leiocarpa (Vogel) J.F.Macbr.							1							48
Fabaceae	Astragalus garbancillo Cav.	Garbancillo, Garbanzo									1				14, 66
Fabaceae	Astragalus pehuenches Nieder	Yerba loca									1				62
Fabaceae	Bauhinia argentinensis Burkart	Pata'e buey, Pata de toro											1		30, 110, 119
Fabaceae	Bauhinia forficata Link	Pata de buey, Pezuña de vaca							1				1	1	1, 8, 9, 12, 23, 32, 34, 36, 37, 38, 47, 53, 54, 64, 65, 67, 68, 74, 75, 76, 77, 81, 100, 101, 122, 123
Fabaceae	Calliandra foliolosa Benth.							1	1						47, 48, 52
Fabaceae	Canavalia brasiliensis Mart. ex Benth.													1	68
Fabaceae	Chamaecrista desvauxii (Collad.) Killip												1		75
Fabaceae	Chamaecrista repens (Vogel) H.S.Irwin & Barneby												1		75
Fabaceae	Chloroleucon tenuiflorum (Benth.) Barneby & J.W.Grimes								1				1		68, 75
Fabaceae	Collaea stenophylla (Hook. & Arn.) Benth.												1		75
Fabaceae	Copaifera langsdorffii Desf.							1							75
Fabaceae	Crotalaria incana L.	Trébol del campo			1								1		74, 107, 111
Fabaceae	Crotalaria micans Link												1		74
Fabaceae	Dahlstedtia muehlbergiana (Hassl.) M.J.Silva & A.M.G.Azevedo	Rabo de mico							1		1		1		47, 52, 53, 73, 75
Fabaceae	Dalbergia frutescens (Vell.) Britton								1				1		47, 75
Fabaceae	Denisophytum stuckertii (Hassl.) E.Gagnon & G.P.Lewis	Gaycurú											1		110, 119
Fabaceae	Desmanthus acuminatus Benth.				1										105
Fabaceae	Desmanthus paspalaceus (Lindm.) Burkart									1					107
Fabaceae	Desmanthus tatuhyensis Hoehne									1					76
Fabaceae	Desmanthus virgatus (L.) Willd.	Rompe piedras								1			1		107, 110
Fabaceae	Desmodium affine Schltdl.									1					47
Fabaceae	Desmodium incanum DC.												1		75
Fabaceae	Enterolobium contortisiliquum (Vell.) Morong	Oreja de mono, Pacará, Timbó, Timboi, Visco		1	1			1			1		1		47, 52, 61, 68, 69, 73, 74, 75, 80, 82, 110, 111, 120
Fabaceae	Erythrina crista-galli L.	Ceibo											1		23, 38, 64, 68, 74, 81, 101, 122
Fabaceae	Erythrina falcata Benth.	Ceiba, Ceibo, Seibo						1					1		42, 53, 61
Fabaceae	Erythrina mulungu Mart.	Ceiba, Ceibo											1		30, 110
Fabaceae	Erythrostemon gilliesii (Wall. ex Hook.) Klotzsch	Barba del chivo, Chosni, Lagaña de perro, Mal de ojo			1			1			1		1	1	9, 33, 34, 65, 84, 87, 92, 118, 122, 124
Fabaceae	Galactia latisiliqua Desv.				1										105
Fabaceae	Geoffroea decorticans (Gillies ex Hook. & Arn.) Burkart	Chañar, Corteza de chañar	1		1			1	1	1			1	1	4, 7, 8, 9, 11, 12, 15, 20, 29, 30, 32, 34, 35, 45, 46, 64, 65, 67, 68, 69, 74, 76, 77, 79, 80, 81, 85, 86, 87, 90, 92, 93, 94, 96, 98, 102, 103, 105, 106, 107, 108, 109, 110, 111, 112, 113, 114, 116, 118, 119, 122, 123, 124
Fabaceae	Geoffroea spinosa Jacq.	Mogote	1												4, 69, 90
Fabaceae	Gleditsia amorphoides (Griseb.) Taub.	Espina de corona						1	1				1		47, 53, 54, 68, 69, 74, 76, 107
Fabaceae	Hoffmannseggia erecta Phil.	Porotillo			1										96
Fabaceae	Hoffmannseggia glauca (Ortega) Eifert	Porotillo	1												118
Fabaceae	Holocalyx balansae Micheli	Alecrín						1	1	1		1	1		47, 48, 50, 52, 54, 73, 75
Fabaceae	Indigofera suffruticosa Mill.	Añil			1			1							68, 70, 111
Fabaceae	Inga affinis DC.	Inga	1						1						47, 55
Fabaceae	Inga marginata Willd.		1												73, 75
Fabaceae	Inga uraguensis Hook. & Arn.		1												68, 69, 73
Fabaceae	Lathyrus magellanicus Lam.	Arvejilla	1										1		21, 56
Fabaceae	Leptospron adenanthum (G.Mey.) A.Delgado							1							112
Fabaceae	Libidibia paraguariensis (D.Parodi) G.P.Lewis	Guayacán			1			1	1	1	1		1		30, 68, 70, 74, 76, 82, 100, 103, 105, 107, 110, 111, 112, 113, 114, 119, 120
Fabaceae	Lonchocarpus nitidus (Vogel) Benth.								1						47
Fabaceae	Lophocarpinia aculeatifolia (Burkart) Burkart												1		119
Fabaceae	Lupinus paraguariensis Chodat & Hassl.												1		74
Fabaceae	Machaerium paraguariense Hassl.								1				1		47
Fabaceae	Machaerium stipitatum (DC.) Vogel								1				1		47
Fabaceae	Macropsychanthus violaceus (Mart. ex Benth.) L.P.Queiroz & Snak							1					1		47
Fabaceae	Macroptilium bracteatum (Nees & C.Mart.) Maréchal & Baudet												1		30
Fabaceae	Macroptilium panduratum (C.Mart. ex Benth.) Maréchal & Baudet		1							1					4, 114
Fabaceae	Mimosa balansae Micheli												1		74
Fabaceae	Mimosa debilis Humb. & Bonpl. ex Willd.	Celosita grande											1		42
Fabaceae	Mimosa detinens Benth.	Breita, Garabato, Garabato negro			1			1	1				1		105, 113, 119
Fabaceae	Mimosa farinosa Griseb.	Shinki			1				1						15, 45, 46
Fabaceae	Mimosa polycarpa Kunth	Celosita chica											1		42
Fabaceae	Mimosa strigillosa Torr. & A.Gray												1		76
Fabaceae	Mimozyganthus carinatus (Griseb.) Burkart	Churqui, Iscayante, Lata						1	1				1		45, 105, 112, 122
Fabaceae	Muellera campestris (Mart. ex Benth.) M.J.Silva & A.M.G.Azevedo	Rabo de bujiú, Rabo itá						1	1				1		47, 49, 53, 54, 75
Fabaceae	Myrocarpus frondosus Allemão	Incienso		1				1	1	1		1	1		47, 48, 53, 75
Fabaceae	Myroxylon peruiferum L.f.	Quina, Quina del campo, Quina colorada											1		41, 42
Fabaceae	Neltuma × vinalillo (Stuck.) C.E.Hughes & G.P.Lewis	Vinal, Vinalillo			1								1		110, 111
Fabaceae	Neltuma aff. nigra (Griseb.) C.E.Hughes & G.P.Lewis							1							120
Fabaceae	Neltuma affinis (Spreng.) C.E.Hughes & G.P.Lewis							1		1			1		68, 74, 76, 107
Fabaceae	Neltuma alba (Griseb.) C.E.Hughes & G.P.Lewis	Algarrobo, Algarrobo blanco, Árbol, Árbol blanco, Camatala, Ktaaco	1		1			1	1	1			1	1	1, 4, 9, 20, 29, 33, 34, 45, 46, 64, 68, 69, 76, 77, 79, 85, 86, 90, 98, 102, 103, 105, 106, 108, 109, 110, 111, 112, 113, 114, 119, 120
Fabaceae	Neltuma alpataco (Phil.) C.E.Hughes & G.P.Lewis	Algarrobo, Alpataco	1						1				1		18, 59, 115
Fabaceae	Neltuma caldenia (Burkart) C.E.Hughes & G.P.Lewis✤	Caldén	1		1			1	1				1	1	92, 118
Fabaceae	Neltuma chilensis (Molina) C.E.Hughes & G.P.Lewis	Algarrobillo, El árbol, Espinillo, Guaschiyo, Huajchillo, Huajcho, Tackellu	1		1			1	1				1		9, 11, 15, 64, 65, 79, 85, 108, 122, 124
Fabaceae	Neltuma denudans (Benth.) C.E.Hughes & G.P.Lewis✤	Algarrobillo, Algarrobo, Alpataco	1						1				1	1	16, 17, 18, 19, 57, 59, 91, 115
Fabaceae	Neltuma elata (Burkart) C.E.Hughes & G.P.Lewis	Algarrobillo, Algarrobo negro	1		1			1	1				1		4, 90, 102, 103, 105, 107, 111
Fabaceae	Neltuma elata (Burkart) C.E.Hughes & G.P.Lewis × Neltuma nigra (Griseb.) C.E.Hughes & G.P.Lewis		1		1					1					90, 111, 114
Fabaceae	Neltuma flexuosa (DC.) C.E.Hughes & G.P.Lewis	Algarrobo, Algarrobo alpataco, Algarrobo dulce, Algarrobo negro, Alpataco, Árbol, Árbol negro, El árbol	1		1			1	1				1	1	11, 15, 92, 93, 94, 96, 108, 118, 124
Fabaceae	Neltuma kuntzei (Harms ex Kuntze) C.E.Hughes & G.P.Lewis	Carandá, Itín, Palo mataco			1			1	1					1	68, 69, 70, 76, 102, 103, 105, 112, 120
Fabaceae	Neltuma nigra (Griseb.) C.E.Hughes & G.P.Lewis	Algarroba, Algarrobo, Algarrobo negro, Árbol negro	1		1			1	1	1	1		1	1	4, 20, 33, 34, 42, 46, 68, 69, 70, 76, 85, 98, 99, 102, 103, 105, 106, 107, 108, 110, 111, 112, 113, 114, 119, 120
Fabaceae	Neltuma ruscifolia (Griseb.) C.E.Hughes & G.P.Lewis	Vinal, Vinalillo	1		1			1		1			1		30, 65, 68, 69, 74, 76, 98, 103, 109, 110, 111, 113, 114, 119
Fabaceae	Neltuma sericantha (Gillies ex Hook.) C.E.Hughes & G.P.Lewis	Albardón, Guaschín, Retama			1			1	1		1				46, 80, 105, 111, 112
Fabaceae	Neptunia pubescens Benth.				1										105
Fabaceae	Otholobium higuerilla (Gillies ex Hook.) J.W.Grimes	Higuerilla											1		33
Fabaceae	Pachyrhizus ahipa (Wedd.) Parodi	Ajipa	1												39
Fabaceae	Parapiptadenia excelsa (Griseb.) Burkart	Cebil, Cebil del monte, Cebil moro, Viscote colorado			1			1	1				1		13, 41, 45, 46, 61
Fabaceae	Parapiptadenia rigida (Benth.) Brenan	Anchico colorado, Anyico						1	1				1		47, 48, 52, 53, 73, 75
Fabaceae	Parasenegalia visco (Lorentz ex Griseb.) Seigler & Ebinger	Arca visco, Visco, Viscote, Viscote negro, Yapan			1			1	1				1		13, 15, 45, 46, 80, 116
Fabaceae	Parkinsonia aculeata L.	Brea 'el agua, Cina-Cina			1				1				1	1	64, 68, 71, 76, 111, 117
Fabaceae	Parkinsonia praecox (Ruiz & Pav. ex Hook.) Hawkins	Brea, Brea 'el bordo	1	1	1			1	1	1			1	1	20, 45, 80, 85, 96, 98, 102, 103, 105, 108, 110, 111, 113, 114, 119, 124
Fabaceae	Peltophorum dubium (Spreng.) Taub.	Cañafístola						1	1				1		47, 48, 49, 53, 75
Fabaceae	Poiretia tetraphylla (Poir.) Burkart	Té de campo, Té pampa		1									1		35, 75, 76, 107
Fabaceae	Poissonia heterantha (Griseb.) Lavin	Culima, Culina	1												66
Fabaceae	Prosopidastrum globosum (Gillies ex Hook. & Arn.) Burkart	Barba de chivo, Mancacaballo			1								1	1	19, 104, 118
Fabaceae	Prosopidastrum striatum (Benth.) R.A.Palacios & Hoc✤	Retamila			1										92
Fabaceae	Pterogyne nitens Tul.	Palo coca, Palo mortero, Tipa, Yvyra-ró						1			1		1		22, 75, 113, 119, 120
Fabaceae	Rhynchosia bicentrica B.L.Turner												1		107
Fabaceae	Rhynchosia diversifolia Micheli	Porotillo											1		33, 76
Fabaceae	Rhynchosia minima (L.) DC.												1		107
Fabaceae	Rhynchosia senna Gillies ex Hook.												1		71
Fabaceae	Schnella microstachya Raddi	Escalera de mono									1		1		47, 52, 53, 54, 73, 75
Fabaceae	Senegalia bonariensis (Gillies ex Hook. & Arn.) Seigler & Ebinger							1					1		68, 75, 107
Fabaceae	Senegalia gilliesii (Steud.) Seigler & Ebinger	Garabato, Garabato macho, Garabato rubio, Quietín, Teatín			1			1	1				1		34, 45, 85, 105, 112, 113, 119, 124
Fabaceae	Senegalia praecox (Griseb.) Seigler & Ebinger	Garabato, Garabato blanco, Garabato 'el bordo, Garabato hembra, Garabato negro, Uña de gato			1			1	1	1			1		34, 45, 76, 79, 85, 105, 107, 111, 114, 119, 122, 124
Fabaceae	Senegalia recurva (Benth.) Seigler & Ebinger												1		75
Fabaceae	Senna aphylla (Cav.) H.S.Irwin & Barneby	Cacho de cabra, Pichana, Pichanilla, Retama, Retamilla			1			1	1				1	1	15, 18, 45, 64, 65, 76, 92, 103, 105, 118, 124
Fabaceae	Senna arnottiana (Gillies ex Hook.) H.S.Irwin & Barneby	Tara						1					1		62, 95
Fabaceae	Senna birostris (Dombey ex Vogel) H.S.Irwin & Barneby	Tanque, Taquillo			1				1				1		13, 66
Fabaceae	Senna chloroclada (Harms) H.S.Irwin & Barneby	Pichana, Retama			1								1		111, 119
Fabaceae	Senna corymbosa (Lam.) H.S.Irwin & Barneby	Cafeto, Falso cafeto, Sen, Sen del campo, Sen Nacional			1								1		9, 33, 64, 65, 67, 68, 74, 81, 87, 122, 124
Fabaceae	Senna crassiramea (Benth.) H.S.Irwin & Barneby	Sumalagua											1		42
Fabaceae	Senna hirsuta (L.) H.S.Irwin & Barneby	Abu											1		64
Fabaceae	Senna morongii (Britton) H.S.Irwin & Barneby	Algarroba del diablo, Malotaco, Pita canuto, Pitacanuto, Pito canuto, Sen del campo			1								1		30, 33, 74, 105, 109, 110, 111, 113, 119
Fabaceae	Senna obtusifolia (L.) H.S.Irwin & Barneby	Garbancillo, Sacha garbanzo									1		1		105, 113
Fabaceae	Senna occidentalis (L.) Link	Café, Cafecillo, Café del monte, Café 'el monte, Cafetillo, Sacha café, Taperyga			1					1	1		1		74, 100, 105, 110, 111, 114, 119
Fabaceae	Senna pendula (Willd.) H.S.Irwin & Barneby	Pitacanuto, Pitacanuto del agua											1		75, 110, 113, 119
Fabaceae	Senna spectabilis (DC.) H.S.Irwin & Barneby	Carnaval											1		42
Fabaceae	Senna spiniflora (Burkart) H.S.Irwin & Barneby	Falso carandá, Pichana, Retama			1			1							105
Fabaceae	Sesbania punicea (Cav.) Benth.													1	48
Fabaceae	Sesbania virgata (Cav.) Pers.	Café						1			1		1		100, 105, 107, 112, 113
Fabaceae	Strombocarpa ferox (Griseb.) C.E.Hughes & G.P.Lewis	Churqui			1			1	1				1	1	13, 66
Fabaceae	Strombocarpa strombulifera (Lam.) A.Gray	Mastuerzo, Pata de loro, Retortuño			1			1					1		65, 96, 118
Fabaceae	Strombocarpa torquata (Cav. ex Lag.) Hutch.✤	Entetaco, Quenti, Quenti tacko, Tintitaco	1		1			1	1				1	1	9, 15, 34, 64, 79, 85, 105, 122, 124
Fabaceae	Tipuana tipu (Benth.) Kuntze	Tipa						1					1		1, 42, 61
Fabaceae	Trifolium polymorphum Poir.												1		74
Fabaceae	Vachellia albicorticata (Burkart) Seigler & Ebinger	Espinillo			1								1		109, 110, 111, 113
Fabaceae	Vachellia aroma (Gillies ex Hook. & Arn.) Seigler & Ebinger	Algarrobilla, Tusca, Tusquilla	1		1			1	1	1	1		1		1, 4, 8, 9, 13, 20, 30, 32, 34, 42, 45, 46, 61, 64, 65, 74, 76, 79, 81, 83, 84, 85, 87, 90, 102, 103, 105, 106, 107, 108, 109, 110, 111, 113, 114, 116, 119, 120, 122, 123, 124
Fabaceae	Vachellia caven (Molina) Seigler & Ebinger	Aromito, Churque, Churqui, Espinillo, Santa Fé, Tusca	1		1			1	1	1			1	1	8, 9, 11, 12, 15, 30, 32, 33, 34, 41, 44, 45, 46, 61, 64, 67, 74, 76, 77, 79, 81, 84, 86, 99, 100, 102, 103, 107, 108, 111, 114, 117, 119, 122, 123, 124
Fabaceae	Vachellia macracantha (Humb. & Bonpl. ex Willd.) Seigler & Ebinger	Churqui, Tusca											1		42
Fabaceae	Vigna luteola (Jacq.) Benth.	Vainilla			1										111
Fabaceae	Zuccagnia punctata Cav.✤	Pupo						1							15
Francoaceae	Balbisia gracilis (Meyen) Hunz. & Ariza	Té de burro, Té de campo, Té santo	1										1		57, 58, 63, 97
Gentianaceae	Centaurium cachanlahuen (Molina) B.L.Rob.	Cachanlagua, Cachanlahue, Cachanlahuen, Cachenlaguen, Canchalagua, Canchalahua, Canchalahue, Kachanlawenb											1		24, 25, 27, 58, 63, 88, 89, 97, 104
Gentianaceae	Gentianella multicaulis (Gillies ex Griseb.) Fabris	Amargón, Nencia											1		33, 64, 65, 122
Gentianaceae	Gentianella parviflora (Griseb.) T.N.Ho	Nencia											1		64
Geraniaceae	Geranium berteroanum Colla	Core-core											1		58, 63, 88
Geraniaceae	Geranium sessiliflorum Cav.	Pastos de cerro			1										13
Geraniaceae	Hypseocharis pimpinellifolia J.Remy	Soldaque			1										13
Gesneriaceae	Mitraria coccinea Cav.	Boqui, Botellita											1		21
Grossulariaceae	Ribes cucullatum Hook. & Arn.	Parrilla, Parrillita, Zarzaparrilla	1										1		21, 57, 58, 60, 63, 88, 89, 97
Grossulariaceae	Ribes magellanicum Poir.	Parrilla, Zarzaparrilla	1					1		1			1		21, 25, 27, 28, 58, 59, 60, 63, 72, 88, 97, 115, 121
Grossulariaceae	Ribes punctatum Ruiz & Pav.	Zarzaparrilla											1		62
Grossulariaceae	Ribes valdivianum Phil.	Parrilla											1		21
Gunneraceae	Gunnera apiculata Schindl.	Querusilla, Querusilla colorada, Quirusilla	1										1		39, 41, 42
Gunneraceae	Gunnera magellanica Lam.	Nalca	1										1		25
Gunneraceae	Gunnera schindleri L.E.Mora	Querusilla blanca											1		42
Gunneraceae	Gunnera tinctoria (Molina) Mirb.	Nalca, Pangue	1										1		21, 24, 28, 56, 57, 58, 59, 60, 63, 88, 89, 97, 121
Hydrocharitaceae	Limnobium laevigatum (Humb. & Bonpl. ex Willd.) Heine	Garganta 'e sapo, Lanteja			1								1		110, 111
Hydroleaceae	Hydrolea sp.									1					68
Hypericaceae	Hypericum brasiliense Choisy	Cabo toril								1			1		33, 47
Hypericaceae	Hypericum connatum Lam.	Cabo toril, Cabotoril, Cabo torilo, Cabo torina, Cucharera											1		9, 12, 32, 33, 43, 64, 65, 68, 74, 77, 81, 122, 123
Iridaceae	Libertia chilensis (Molina) Gunckel	Trique-trique											1		58
Iridaceae	Olsynium junceum (E.Mey. ex C.Presl) Goldblatt		1												115
Iridaceae	Sisyrinchium arenarium Poepp.	Chaleo rosado											1		58
Iridaceae	Sisyrinchium chilense Hook.	Marancel											1		33
Iridaceae	Sisyrinchium macrocarpum Hieron.	Tamascán											1		95
Iridaceae	Sisyrinchium pachyrhizum Baker												1		74
Iridaceae	Sisyrinchium patagonicum Phil. ex Baker												1		88
Iridaceae	Sisyrinchium vaginatum Spreng.												1		74
Juglandaceae	Juglans australis Griseb.	Nogal, Nogal cimarrón	1		1			1	1				1		39, 42, 45, 46, 61, 80
Juncaceae	Juncus acutus L.	Junco bravo, Junco negro						1							118
Juncaceae	Juncus aff. balticus Willd.							1							115
Juncaceae	Juncus balticus Willd.	Mallin, Junquillo											1	1	19, 58
Juncaceae	Juncus dichotomus Elliot												1		71
Juncaceae	Luzula brachyphylla Phil.	San Juanito											1		58
Juncaceae	Marsippospermum grandiflorum (L.f.) Hook.f.							1							72, 115
Krameriaceae	Krameria lappacea (Dombey) Burdet & B.B.Simpson	Chipi chape, Chipichape											1		41, 42, 66
Lamiaceae	Cantinoa althaeifolia (Pohl ex Benth.) Harley & J.F.B.Pastore							1							49, 75
Lamiaceae	Cantinoa mutabilis (Rich.) Harley & J.F.B.Pastore	Salvia, Salvia Lora, Salvia mora, Verbena negra								1			1		33, 42, 65, 67, 68, 74, 75, 87
Lamiaceae	Clinopodium bolivianum (Benth.) Kuntze	Muña											1		42, 44
Lamiaceae	Clinopodium darwinii (Benth.) Kuntze	Té andino, Té de campo, Té pampa, Tomillo							1				1		16, 25, 27, 89, 104
Lamiaceae	Clinopodium gilliesii (Benth.) Kuntze	Muña, Muña de burro, Muña muña, Muñamuña	1	1	1					1			1		1, 2, 13, 20, 39, 41, 42, 64, 65, 66, 86, 116
Lamiaceae	Clinopodium odorum (Griseb.) Harley	Muña de cabra, Salvilori			1								1		13, 33
Lamiaceae	Condea floribunda (Briq.) Harley & J.F.B.Pastore									1			1		74, 75
Lamiaceae	Cunila microcephala Benth.	Poleo											1		54
Lamiaceae	Hedeoma multiflora Benth.	Menta del campo, Peperina, Tomillo, Tomillo serrano, Tomillo de la sierra, Yerba del pajarito, Yerba del pájaro		1	1								1		9, 12, 32, 33, 34, 46, 64, 65, 67, 77, 81, 87, 95, 122, 124
Lamiaceae	Hyptis lappacea Benth.	Pitacanuto, Yerba de la chiva			1								1	1	30, 68, 82, 111
Lamiaceae	Lepechinia floribunda (Benth.) Epling	Salvia, Salvia blanca, Salvia olorosa											1		9, 41, 64
Lamiaceae	Lepechinia meyenii (Walp.) Epling	Salvia guiadora			1										13
Lamiaceae	Lepechinia vesiculosa (Benth.) Epling	Salvia, Salvia blanca, Salvia grande											1		42, 43, 44
Lamiaceae	Minthostachys verticillata (Griseb.) Epling✤	Peperina, Toronjil cerreño		1						1		1	1		9, 11, 12, 32, 33, 34, 35, 42, 64, 65, 67, 77, 81, 84, 122, 123, 124
Lamiaceae	Ocimum campechianum Mill.												1		107
Lamiaceae	Ocimum carnosum (Spreng.) Link & Otto ex Benth	Albahaca								1			1		8, 9, 47, 50, 74, 122
Lamiaceae	Ocimum nudicaule Benth.			1									1		75
Lamiaceae	Ocimum ovatum Benth.												1		74
Lamiaceae	Salvia atrocyanea Epling	Salvia, Salvia flor azul						1					1		41, 61
Lamiaceae	Salvia cardiophylla Benth.	Campanita, Sacha salvia, Sanalotodo									1		1		74, 76, 105
Lamiaceae	Salvia cuspidata Ruiz & Pav.	Salvia, Salvia del cerro, Salvia chica, Salvia gateadora, Salvia morada	1		1			1					1		13, 33, 41, 42, 44, 66, 86, 93, 95
Lamiaceae	Salvia guaranitica A.St.-Hil. ex Benth.									1					47
Lamiaceae	Salvia stachydifolia Benth.	Matico, Salvia grande			1								1		13, 67
Lamiaceae	Scutellaria racemosa Pers.				1										111
Lamiaceae	Stachys gilliesii Benth.												1		74
Lamiaceae	Teucrium cubense Jacq.	Ajenjo											1		33
Lamiaceae	Vitex cymosa Bertero ex Spreng.							1							73
Lamiaceae	Vitex megapotamica (Spreng.) Moldenke	Tarumá	1					1	1						47, 48, 49, 52, 55
Lardizabalaceae	Boquila trifoliolata (DC.) Decne.	Pil-pil, Voqui											1		21
Lauraceae	Nectandra angustifolia (Schrad.) Nees & Mart.							1	1	1			1		47, 49, 68, 69, 75
Lauraceae	Ocotea diospyrifolia (Meisn.) Mez								1				1		47, 68, 74
Lauraceae	Ocotea porphyria (Griseb.) van der Werff	Laurel, Laurel del campo											1		41, 42
Lauraceae	Ocotea puberula (Rich.) Nees	Guaicá, Laurel						1	1				1		42, 47, 48, 50, 52, 53, 75
Linaceae	Cliococca selaginoides (Lam.) C.M.Rogers & Mildner	Meru-Laguen											1		33, 71
Loasaceae	Blumenbachia dissecta (Hook. & Arn.) Weigend & J.Grau	Ortiga, Ortiguilla	1										1		56, 58
Loasaceae	Blumenbachia sylvestris Poepp.												1		88
Loasaceae	Caiophora chuquitensis (Meyen) Urb. & Gilg	Itapaya, Itapaia, Ortiguilla									1		1		14, 44
Loasaceae	Caiophora lateritia Klotzsch	Itapalla, Ortiguilla								1			1		41, 42
Loganiaceae	Strychnos brasiliensis (Spreng.) Mart.	Ñuatí kurusú							1				1		47, 54, 75
Loranthaceae	Ligaria cuneifolia (Ruiz & Pav.) Tiegh.	Flor de liga, Injerto, Liga, Liga colorada, Ligui'a, Liguilla de flor roja, Liguilla roja, Llavecita, Muérdago			1			1		1			1		8, 9, 12, 20, 33, 46, 61, 64, 65, 81, 83, 84, 85, 86, 93, 95, 103, 116, 122, 123, 124
Loranthaceae	Struthanthus uraguensis (Hook. & Arn.) G.Don	Liga, Liga de árbol, Liga del mistol			1					1			1		30, 46, 85, 105, 109, 110, 111, 113, 114, 119
Loranthaceae	Tripodanthus acutifolius (Ruiz & Pav.) Tiegh.	Corpito, Corpo, Corpus, Liga, Liga del palo santo, Liga 'el palo santo			1			1		1			1		20, 42, 46, 68, 80, 109, 110, 111, 119
Loranthaceae	Tripodanthus flagellaris (Cham. & Schltdl.) Tiegh.	Corpo, Liga blanca, Liga de flor amarilla, Liguilla											1		32, 33, 68, 81, 84
Loranthaceae	Tristerix corymbosus (L.) Kuijt	Quintral, Quintral de maqui											1		21, 58
Lycopodiaceae	Lycopodium clavatum L.	Pillijan											1		33
Lycopodiaceae	Phlegmariurus mandiocanus (Raddi) B. Øllg.	Pino del aire												1	51
Lycopodiaceae	Phlegmariurus saururus (Lam.) B. Øllg.	Cola de quirquincho								1	1		1		9, 12, 32, 33, 34, 64, 65, 67, 74, 81, 84, 122, 123, 124
Lythraceae	Cuphea glutinosa Cham. & Schltdl.	Sanguinaria, Siete sangrías								1			1		32, 33, 53, 64, 65, 68, 74, 75, 81, 123
Lythraceae	Cuphea lysimachioides Cham. & Schltdl.												1		74
Lythraceae	Cuphea racemosa (L.f.) Spreng.									1			1		68, 69, 74
Lythraceae	Heimia salicifolia Link	Arupaco, Arupaqui, Enchullador, Guaycurú, Pichana, Quiebra arado, Quiebrarado, Quiebra'arao		1	1			1			1	1	1		8, 9, 12, 30, 33, 46, 64, 65, 68, 74, 76, 80, 81, 82, 83, 84, 103, 105, 107, 109, 110, 111, 119, 122, 123, 124
Malpighiaceae	Aspicarpa sericea Griseb.												1		119
Malpighiaceae	Dicella nucifera Chodat	Maní del mono, Maní del monte	1										1		47, 55, 73, 75
Malpighiaceae	Heteropterys dumetorum (Griseb.) Nied.	Loconte amarillo			1										46
Malpighiaceae	Heteropterys glabra Hook. & Arn.	Tilo, Tilo de campo											1		53, 54, 74, 100
Malpighiaceae	Heteropterys intermedia (A.Juss.) Griseb.												1		47
Malpighiaceae	Janusia guaranitica (A.St.-Hil.) A.Juss.	Yerba de la vida											1		33, 107, 119
Malpighiaceae	Mascagnia brevifolia Griseb.	Loconte			1			1					1		111, 112, 119
Malvaceae	Abutilon grandifolium (Wild.) Sweet	Malva			1					1				1	34, 107, 111
Malvaceae	Abutilon terminale (Cav.) A.St.-Hil.												1		74
Malvaceae	Acaulimalva nubigena (Walp.) Krapov.	Altea											1		41, 42
Malvaceae	Anoda cristata (L.) Schltdl.	Malvisco											1		44
Malvaceae	Bastardiopsis densiflora (Hook. & Arn.) Hassl.							1							48
Malvaceae	Byttneria filipes Mart. ex K.Schum.	Garabato'el agua								1			1		110, 114
Malvaceae	Callianthe pauciflora (A.St.-Hil.) Dorr	Farolito						1					1		33, 79
Malvaceae	Ceiba chodatii (Hassl.) Ravenna	Palo borracho, Yuchán	1		1			1	1	1			1		4, 45, 46, 82, 112, 113, 119
Malvaceae	Ceiba speciosa (A.St.-Hil.) Ravenna						1	1	1	1			1		47, 48, 68, 69, 74, 75, 76
Malvaceae	Cienfuegosia drummondii (A.Gray) Lewton												1		107
Malvaceae	Cienfuegosia sulphurea (A.St.-Hil.) Garcke												1		74
Malvaceae	Corchorus hirtus L.												1		119
Malvaceae	Corynabutilon bicolor (Phil. ex K.Schum.) Kearney	Monte moro							1				1		16, 17, 89, 91
Malvaceae	Hochreutinera hasslerana (Hochr.) Krapov.												1		74, 76
Malvaceae	Lecanophora ameghinoi (Speg.) Speg.	Huella											1		58
Malvaceae	Luehea divaricata Mart.	Soita							1				1		47, 53, 75
Malvaceae	Malvastrum coromandelianum (L.) Garcke	Afato, Escoba dura macho, Potro huatana, Yuyo colorado, Yerba del potro			1			1					1		9, 33, 47, 68, 74, 76, 81, 84, 85, 105
Malvaceae	Melochia pilosa (Mill.) Fawc. & Rendle												1		75
Malvaceae	Modiola caroliniana (L.) G.Don	Sanalotodo											1		33, 71, 101
Malvaceae	Modiolastrum malvifolium (Griseb.) K.Schum.												1		68, 69
Malvaceae	Pavonia argentina Gürke	Malvisco del cerro											1		44
Malvaceae	Pavonia communis A.St.-Hil.							1							49
Malvaceae	Pavonia sepium A.St.-Hil.	Abrojo						1					1		42, 49, 68
Malvaceae	Pavonia subrotunda A.St.-Hil. & Naudin							1					1		49, 75
Malvaceae	Pseudabutilon virgatum (Cav.) Fryxell												1		113
Malvaceae	Sida argentina K. Schum.	Guatana, Potro								1					44
Malvaceae	Sida cordifolia L.	Malva, Malva blanca, Malvón			1						1		1		20, 53, 54, 74, 105, 110, 111, 116
Malvaceae	Sida glabra Mill.	Yerba del potro			1										124
Malvaceae	Sida poeppigiana (K.Schum.) Fryxell	Afata											1		42
Malvaceae	Sida rhombifolia L.	Afata, Escoba dura, Escobadura, Typycha ratá, Yerba del potro			1			1		1			1		1, 36, 42, 44, 47, 53, 54, 68, 69, 71, 74, 75, 81, 84, 100, 105, 107
Malvaceae	Sida santaremensis Monteiro												1		69
Malvaceae	Sida spinosa L.												1		74, 107
Malvaceae	Sida urens L.												1		75
Malvaceae	Sphaeralcea bonariensis (Cav.) Griseb.	Malva, Malva blanca, Malvarisco, Malvilla			1			1			1		1		9, 20, 30, 37, 46, 67, 76, 80, 81, 83, 86, 103, 105, 107, 110, 113
Malvaceae	Sphaeralcea cordobensis Krapov.	Malva, Malva dulce		1	1								1		8, 9, 32, 64, 87, 122, 124
Malvaceae	Sphaeralcea mendocina Phil.	Malvisco											1		93
Malvaceae	Tarasa antofagastana (Phil.) Krapov.	Malva						1			1		1		14, 66
Malvaceae	Tarasa tenella (Cav.) Krapov.	Malva											1		66
Malvaceae	Wissadula densiflora R.E.Fr.	Afata			1										105, 111
Marantaceae	Goeppertia eichleri (Petersen) Borchs. & S.Suárez							1							47
Marantaceae	Maranta sobolifera L.Andersson	Anyiyiba						1		1			1		47, 53, 75
Marantaceae	Thalia geniculata L.	Thalia	1		1										23, 111
Marsileaceae	Marsilea sp.	Lanteja			1										111
Martyniaceae	Craniolaria integrifolia Cham.												1		75
Martyniaceae	Ibicella parodii Abbiatti												1		119
Meliaceae	Cabralea canjerana (Vell.) Mart.							1					1		47, 48, 49, 75
Meliaceae	Cedrela angustifolia DC.	Cedro			1			1					1		13, 42, 61
Meliaceae	Cedrela fissilis Vell.		1					1	1				1	1	47, 48, 50, 52, 73, 75
Meliaceae	Guarea guidonia (L.) Sleumer												1		75
Meliaceae	Guarea macrophylla Vahl	Cedrillo											1		47, 53, 54
Meliaceae	Trichilia catigua A.Juss.	Catiguá, Kaatiguá						1	1				1		22, 47, 48, 49, 68, 69, 70, 75
Meliaceae	Trichilia claussenii C.DC.							1		1					48, 49, 75
Meliaceae	Trichilia elegans A.Juss.							1					1		47, 75
Menispermaceae	Cissampelos pareira L.	Mil hombres, Níspero								1			1		42, 68, 74, 75, 110
Menispermaceae	Odontocarya asarifolia Barneby		1												4
Menyanthaceae	Nymphoides indica (L.) Kuntze	Lampazo											1		110
Misodendraceae	Misodendrum punctulatum DC.												1		72
Monimiaceae	Hennecartia omphalandra J.Poiss.									1			1		47, 75
Moraceae	Dorstenia brasiliensis Lam.									1			1		68, 74
Moraceae	Ficus luschnathiana (Miq.) Miq.	Higuerón	1										1		47, 53, 68, 69, 74, 75, 100
Moraceae	Maclura tinctoria (L.) Steud.	Mora, Mora amarilla, Tajauba	1		1			1	1				1		4, 47, 53, 68, 69, 70, 73, 74, 75, 76, 111, 113, 119, 120
Moraceae	Sorocea bonplandii (Baill.) W.C.Burger, Lanj. & Wess.Boer	Ñandy'pa	1					1		1			1		47, 48, 50, 54, 73, 75
Myrtaceae	Acca sellowiana (O.Berg) Burret	Falso guayabo	1												23
Myrtaceae	Amomyrtella güili (Speg.) Kausel	Guayaba, Guayabo blanco	1										1		39, 41
Myrtaceae	Amomyrtus luma (Molina) D.Legrand & Kausel	Luma	1										1		21, 61
Myrtaceae	Blepharocalyx salicifolius (Kunth) O.Berg	Anacahuita, Arrayán	1										1		23, 37, 43, 64, 65, 74
Myrtaceae	Campomanesia aurea O.Berg		1												73, 75
Myrtaceae	Campomanesia guaviroba (DC.) Kiaersk.		1						1						47, 73
Myrtaceae	Campomanesia guazumifolia (Cambess.) O.Berg	Sietecapote, Siete capotes, Sietecapotes	1						1				1		47, 53, 54, 55, 73, 75
Myrtaceae	Campomanesia xanthocarpa O.Berg	Guabiroba, Guavirá, Guavyrá	1						1				1	1	22, 47, 48, 53, 54, 55, 73, 75
Myrtaceae	Eugenia burkartiana (D.Legrand) D.Legrand								1						47
Myrtaceae	Eugenia involucrata DC.	Cerella, Cereza, Dzika czeresnia, Wisnia	1					1	1						47, 55, 73, 75
Myrtaceae	Eugenia lilloana D.Legrand✤		1												73, 75
Myrtaceae	Eugenia myrcianthes Nied.	Uvajay	1					1					1		68, 69, 73, 74, 75, 100, 107
Myrtaceae	Eugenia pitanga (O.Berg) Kiaersk.		1										1		73, 74
Myrtaceae	Eugenia pyriformis Cambess.	Aguajai, Ubalha, Uva jay, Uvajay	1					1	1				1		47, 48, 53, 54, 55, 73, 75
Myrtaceae	Eugenia uniflora L.	Arrayán, Arrayán colorado, Ñangapirí, Ñangapiry, Pitanga	1					1	1				1		36, 39, 41, 42, 47, 48, 49, 53, 54, 55, 67, 68, 69, 73, 74, 75, 76, 100, 106
Myrtaceae	Luma apiculata (DC.) Burret	Arrayán, Palo rojo, Quetri, Quineo	1										1	1	21, 25, 56, 60
Myrtaceae	Myrceugenia euosma (O.Berg) D.Legrand		1												73, 75
Myrtaceae	Myrcia anomala Cambess.		1												73, 75
Myrtaceae	Myrcia cruciflora A.R.Lourenço & E.Lucas								1						47
Myrtaceae	Myrcia oblongata DC.		1												73, 75
Myrtaceae	Myrcia palustris DC.		1										1		73, 75
Myrtaceae	Myrcia selloi (Spreng.) N.Silveira		1												68
Myrtaceae	Myrcianthes cisplatensis (Cambess.) O.Berg	Huil, Mato, Mato huil			1			1	1						45, 46, 80, 99
Myrtaceae	Myrcianthes mato (Griseb.) McVaugh	Guayabo morado	1												39
Myrtaceae	Myrcianthes pungens (O.Berg) D.Legrand	Guaviyú, Mato	1							1			1		22, 39, 68, 69, 73, 74, 75, 90, 107, 114
Myrtaceae	Myrciaria delicatula (DC.) O.Berg		1										1		73, 75
Myrtaceae	Plinia peruviana (Poir.) Govaerts	Yaboticaba	1					1					1		47, 49, 53, 54, 55, 68, 69, 73, 74, 75
Myrtaceae	Plinia rivularis (Cambess.) Rotman	Guaporait'í, Vaporait'í, Vaporit'í, Yvaporoití	1					1	1				1		22, 47, 49, 55, 73, 75
Myrtaceae	Psidium australe Cambess.		1										1		73, 75
Myrtaceae	Psidium grandifolium DC.		1												73, 75
Myrtaceae	Psidium guajava L.	Arasa, Arazay, Goayaba, Guayaba, Guayabo, Guayava	1		1								1	1	23, 39, 48, 53, 54, 68, 73, 74, 75, 90, 100, 105
Myrtaceae	Psidium guineense Sw.	Arazay	1										1		42, 73, 74, 75
Myrtaceae	Psidium missionum D.Legrand		1												73, 75
Myrtaceae	Psidium salutare (Humb., Bonpl. & Kunth) O.Berg	Alpamato		1									1		12, 33, 74
Myrtaceae	Ugni molinae Turcz.	Murtilla	1												59
Nothofagaceae	Nothofagus antarctica (G.Forst.) Oerst.	Ñire						1	1				1		10, 21, 72, 91
Nothofagaceae	Nothofagus betuloides (Mirb.) Oerst.							1							72
Nothofagaceae	Nothofagus dombeyi (Mirb.) Oerst.	Cohiue											1	1	21, 25, 58
Nothofagaceae	Nothofagus obliqua (Mirb.) Oerst.	Roble pellín											1		21, 58
Nothofagaceae	Nothofagus pumilio (Poepp. & Endl.) Krasser	Lenga	1					1	1				1		10, 21, 72
Nyctaginaceae	Bougainvillea campanulata Heimerl			1											90
Nyctaginaceae	Bougainvillea praecox Griseb.	Afata, Palo blanco, Yuyo blanco			1			1	1		1				105, 111
Nyctaginaceae	Bougainvillea spinosa (Cav.) Heimerl	Monte negro			1										92
Nyctaginaceae	Bougainvillea stipitata Griseb.	Espinillo, Huancar, Tala falso	1	1	1			1	1				1		34, 41, 42, 46, 90, 124
Nyctaginaceae	Colignonia glomerata Griseb.	Santa Lucía								1					40
Nyctaginaceae	Pisonia zapallo Griseb.	Francisco Alvarez, Kaspi zapallo						1		1			1	1	68, 76, 82, 107
Nymphaeaceae	Nymphaea jamesoniana Planch.		1		1										4, 111
Nymphaeaceae	Victoria cruziana Orb.		1										1		68, 74
Olacaceae	Ximenia americana L.	Albaricoque, Albarillo, Albarillo del campo, Bricoque, Pata, Pata pata, Patial	1		1			1	1				1	1	7, 11, 29, 33, 80, 92, 94, 103, 105, 108, 109, 110, 111, 119, 120, 124
Oleaceae	Menodora integrifolia (Cham. & Schltdl.) Steud.										1				105
Onagraceae	Fuchsia magellanica Lam.	Aljaba, Chilca, Chilco, Fucsia											1	1	21, 24, 25, 58
Onagraceae	Ludwigia bonariensis (Micheli) H.Hara	Carnavalito			1										111
Onagraceae	Ludwigia elegans (Cambess.) H.Hara												1		75
Onagraceae	Ludwigia octovalvis (Jacq.) P.H.Raven												1		119
Onagraceae	Ludwigia peploides (Kunth) P.H.Raven	Duraznillo del agua			1								1		33, 68, 76, 111
Onagraceae	Oenothera affinis Cambess.	Flor de la noche, Suspiros											1		20, 33
Onagraceae	Oenothera indecora Cambess.												1		71
Onagraceae	Oenothera mollissima L.	Cococho amarillo											1		44
Onagraceae	Oenothera odorata Jacq.	Don diego de la noche											1		21
Onagraceae	Oenothera parodiana Munz												1		71
Orchidaceae	Acianthera aphthosa (Lindl.) Pridgeon & M.W.Chase													1	51
Orchidaceae	Acianthera hygrophila (Barb.Rodr.) Pridgeon & M.W.Chase													1	51
Orchidaceae	Acianthera pubescens (Lindl.) Pridgeon & M.W.Chase													1	51
Orchidaceae	Acianthera recurva (Lindl.) Pridgeon & M.W.Chase													1	51
Orchidaceae	Acianthera rhabdosepala (Schltr.) Chiron & C.Berg													1	51
Orchidaceae	Acianthera sonderana (Rchb.f.) Pridgeon & M.W.Chase													1	51
Orchidaceae	Anathallis linearifolia (Cogn.) Pridgeon & M.W.Chase													1	51
Orchidaceae	Aspidogyne kuczynskii (Porsch) Garay												1		47
Orchidaceae	Barbosella cogniauxiana (Speg. & Kraenzl.) Schltr.													1	51
Orchidaceae	Brachystele camporum (Lindl.) Schltr.												1		74
Orchidaceae	Brasiliorchis picta (Hook.) R.B.Singer, S.Koehler & Carnevali							1						1	50, 51
Orchidaceae	Bulbophyllum napelli Lindl.													1	51
Orchidaceae	Campylocentrum grisebachii Cogn.													1	51
Orchidaceae	Campylocentrum neglectum (Rchb.f. & Warm.) Cogn.													1	51
Orchidaceae	Capanemia micromera Barb.Rodr.													1	51
Orchidaceae	Capanemia superflua (Rchb.f.) Garay													1	51
Orchidaceae	Catasetum fimbriatum (C.Morren) Lindl. & Paxton							1		1			1	1	49, 50, 51, 74, 75
Orchidaceae	Cattleya cernua (Lindl.) C.Berg													1	51
Orchidaceae	Cyclopogon congestus (Vell.) Hoehne													1	51
Orchidaceae	Cyclopogon elatus (Sw.) Schltr.									1			1		47, 68, 74
Orchidaceae	Cyrtopodium palmifrons Rchb.f. & Warm.							1					1	1	49, 50, 51, 74
Orchidaceae	Cyrtopodium pflanzii Schltr.	Calaguala, Chacra del monte, Chacra'el monte, Palma de aire								1			1		78, 105, 110, 113, 119
Orchidaceae	Epidendrum rigidum Jacq.													1	51
Orchidaceae	Eurystyles actinosophila (Barb.Rodr.) Schltr.													1	51
Orchidaceae	Gomesa bifolia (Sims) M.W.Chase & N.H.Williams	Banderilla, Margarita, Pajarilla, Periconita			1			1					1		42, 46, 50, 68, 74, 76, 100
Orchidaceae	Gomesa cornigera (Lindl.) M.W.Chase & N.H.Williams													1	51
Orchidaceae	Gomesa longicornu (Mutel) M.W.Chase & N.H.Williams													1	51
Orchidaceae	Gomesa longipes (Lindl. & Paxton) M.W.Chase & N.H.Williams							1						1	51, 75
Orchidaceae	Gomesa paranaensoides M.W.Chase & N.H.Williams													1	51
Orchidaceae	Gomesa recurva R.Br.													1	51
Orchidaceae	Gomesa riograndensis (Cogn.) M.W.Chase & N.H.Williams							1						1	50, 51
Orchidaceae	Grandiphyllum divaricatum (Lindl.) Docha Neto													1	51
Orchidaceae	Grandiphyllum edwallii (Cogn.) Docha Neto													1	51
Orchidaceae	Grandiphyllum pulvinatum (Lindl.) Docha Neto												1		74
Orchidaceae	Isabelia virginalis Barb.Rodr.													1	51
Orchidaceae	Isochilus linearis (Jacq.) R.Br.													1	51
Orchidaceae	Malaxis parthoni C.Morren													1	51
Orchidaceae	Maxillaria spegazziniana Kraenzl.													1	51
Orchidaceae	Maxillaria vitelliniflora Barb.Rodr.													1	51
Orchidaceae	Miltonia flavescens Lindl.												1	1	47, 51
Orchidaceae	Pabstiella aveniformis (Hoehne) Luer													1	51
Orchidaceae	Pabstiella matinhensis (Hoehne) Luer													1	51
Orchidaceae	Phymatidium delicatulum Lindl.													1	51
Orchidaceae	Sarcoglottis cf. grandiflora (Hook.) Klotzsch									1					76
Orchidaceae	Specklinia grobyi (Bateman ex Lindl.) F.Barros													1	51
Orchidaceae	Trichocentrum pumilum (Lindl.) M.W.Chase & N.H.Williams												1	1	51, 74
Orchidaceae	Warrea warreana (Lodd. ex Lindl.) C.Schweinf.													1	51
Orchidaceae	Zygopetalum maxillare Lodd.													1	51
Orobanchaceae	Agalinis communis (Cham. & Schltdl.) D'Arcy												1		74
Orobanchaceae	Agalinis fiebrigii (Diels) D'Arcy	Culli culli											1		41
Orobanchaceae	Agalinis genistifolia (Cham. & Schltdl.) D'Arcy	Conejitos silvestres											1		33
Orobanchaceae	Buchnera longifolia Kunth												1		75
Orobanchaceae	Escobedia grandiflora (L.f.) Kuntze							1							49
Osmundaceae	Osmunda spectabilis Willd.												1		75
Oxalidaceae	Oxalis adenophylla Gillies ex Hook. & Arn.	Culle colorado, Cuye bueno, Cuye colorado	1										1		56, 57, 58, 63, 88, 89, 97
Oxalidaceae	Oxalis brasiliensis Lodd., G.Lodd. & W.Lodd. ex Hildebr.		1												68
Oxalidaceae	Oxalis conorrhiza Jacq.	Saladillo, Vinagrillo			1					1			1		46, 68, 75, 76
Oxalidaceae	Oxalis debilis Kunth	Batatita, Szczaw, Tipo trébol	1							1					55, 68
Oxalidaceae	Oxalis erythrorhiza Gillies ex Hook. & Arn.	Yerba del guanaco											1		62
Oxalidaceae	Oxalis linarantha Lourteig		1												47
Oxalidaceae	Oxalis nahuelhuapiensis Speg.	Cuye											1		97
Oxalidaceae	Oxalis triangularis A.St.-Hil.	Trébol rojo											1	1	25, 74
Oxalidaceae	Oxalis tuberosa Molina	Oca	1							1					39, 40
Oxalidaceae	Oxalis valdiviensis Barnéoud	Culle, Culle amarillo, Cuye, Cuyi-cuyi, Vinagrillo	1										1		21, 58, 63
Papaveraceae	Argemone subfusiformis G.B.Ownbey	Cardo amarillo, Cardo Santo, Cardosanto			1					1			1		9, 12, 32, 41, 42, 44, 64, 65, 74, 100, 105, 107, 122, 124
Papaveraceae	Bocconia integrifolia Bonpl.	Gavilán, Mil hombres, Palo amarillo						1					1		42, 61
Passifloraceae	Passiflora alata Curtis	Maracuyá, Murucuya, Pasionaria	1										1		54, 55
Passifloraceae	Passiflora caerulea L.	Granadilla, Mburucujá, Muburucuyá, Pasionaria	1										1	1	7, 8, 9, 12, 20, 23, 29, 32, 33, 34, 35, 36, 38, 64, 65, 67, 68, 69, 73, 74, 76, 77, 81, 100, 101, 106, 107, 108, 122, 123, 124
Passifloraceae	Passiflora cincinnata Mast.		1												90
Passifloraceae	Passiflora edulis Sims	Maracuyá, Marakuja, Mburucuya, Pasiflora	1										1		53, 67, 68, 73
Passifloraceae	Passiflora foetida L.	Pasionaria	1		1								1		33, 73, 111
Passifloraceae	Passiflora misera Kunth	Granadilla	1		1								1		73, 74, 111
Passifloraceae	Passiflora mooreana Hook.f.	Bicuya, Granada del monte, Granadilla, Mburucuya, Pasionaria, Pata de suri, Sacha granada	1		1								1	1	4, 29, 65, 76, 87, 90, 103, 105, 110, 113, 119
Passifloraceae	Passiflora palmatisecta Mast.	Granadilla pedernida											1		110
Passifloraceae	Passiflora suberosa L.												1		74
Passifloraceae	Passiflora tenuifila Killip	Granadilla											1		42
Passifloraceae	Passiflora umbilicata (Griseb.) Harms	Granada						1					1		41, 61
Passifloraceae	Turnera sidoides L.	Damiana			1								1		1, 64, 65, 105, 107
Petiveriaceae	Petiveria alliacea L.	Anamú, Calajchín, Calaj'chín, Calanchín, Calaschi, Calauchín, Guiné, Pipi, Pipí, Yerba pipi, Yuyo								1		1	1		30, 31, 41, 42, 47, 48, 53, 54, 64, 65, 67, 74, 75, 76, 100, 107, 109, 110, 119
Petiveriaceae	Rivina humilis L.	Hierba del cáncer, Sangre de toro	1					1		1			1		23, 33, 49, 68, 70, 75, 114
Petiveriaceae	Seguieria americana L.												1		47
Phrymaceae	Erythranthe glabrata (Kunth) G.L.Nesom	Berro, Berro amarillo, Berro hembra, Lechuga acuática, Placa	1										1		33, 56, 57, 58, 63, 66
Phyllanthaceae	Phyllanthus niruri L.	Quebra pedra, Quebrapiedras, Rompepiedras, Rompe piedras											1		23, 37, 53, 54, 74, 107, 110, 119
Phyllanthaceae	Phyllanthus sellowianus (Klotzsch) Müll.Arg.	Sarandí, Sarandí blanco											1		23, 36, 37, 38, 64, 65, 67, 74, 100
Phytolaccaceae	Phytolacca bogotensis Kunth							1							47, 49
Phytolaccaceae	Phytolacca dioica L.	Ombú								1			1		9, 35, 43, 47, 68, 71, 74, 75, 76, 107
Phytolaccaceae	Phytolacca thyrsiflora Fenzl ex J.A.Schmidt							1							49
Piperaceae	Peperomia aceroana C.DC.												1		74
Piperaceae	Peperomia alata Ruiz & Pav.	Anís del monte											1		42
Piperaceae	Peperomia arifolia Miq.	Anís del monte											1		42
Piperaceae	Peperomia circinnata Link												1		47
Piperaceae	Peperomia comarapana C.DC.												1		76
Piperaceae	Peperomia tetraphylla Hook. & Arn.	Siemprevida chica											1	1	42, 51
Piperaceae	Peperomia theodori Trel.	Siempreviva											1		42
Piperaceae	Peperomia tominana C.DC.	Siempre ida, Siemprevida											1		41, 42
Piperaceae	Piper aduncum L.	Matico						1					1		41, 42, 61
Piperaceae	Piper amalago L.									1			1		47, 74
Piperaceae	Piper mikanianum (Kunth) Steud.	Pari paroba								1			1		47, 53, 54
Plantaginaceae	Callitriche lechleri (Hegelm.) Fassett	Fen fen											1		58
Plantaginaceae	Monttea aphylla (Miers) Benth. & Hook.	Ala, Ala de loro, Matasebo, Yaque			1				1				1		16, 17, 92, 93, 96, 118
Plantaginaceae	Plantago australis Lam.	Lantín, Llantén, Llantén hoja ancha, Llantén venoso, Llantín blanco, Oreja de conejo, Yantin	1		1								1		13, 41, 42, 44, 53, 54, 55, 64, 65, 88
Plantaginaceae	Plantago myosuros Lam.	Llantén, Llantén macho, Llantén peludo			1								1		42, 44, 64, 65, 105, 110, 111, 123
Plantaginaceae	Plantago orbignyana Steinh. ex Decne.	Llantín blanco											1		41
Plantaginaceae	Plantago patagonica Jacq.	Cola de piche			1								1		92, 93
Plantaginaceae	Plantago tomentosa Lam.	Lantín, Llantén, Llantén blanco, Llantén peludito, Llantén peludo			1								1		8, 9, 30, 41, 64, 65, 68, 69, 71, 74, 100, 107, 122, 124
Plantaginaceae	Scoparia dulcis L.	Yerba de víbora											1		42, 74
Plantaginaceae	Scoparia hassleriana Chodat									1					75
Plantaginaceae	Scoparia montevidensis (Spreng.) R.E.Fr.	Canchalagua								1			1		12, 33, 64, 65, 74, 77, 81, 87, 123
Plantaginaceae	Scoparia nudicaulis Chodat	Flor de casamiento			1								1		110, 111
Plantaginaceae	Scoparia plebeja Cham. & Schltdl.	Yerba de víbora											1		42
Plantaginaceae	Stemodia ericifolia (Kuntze) K.Schum.	Barba 'e sapo			1										111
Plantaginaceae	Stemodia lanceolata Benth.	Albahaca 'el campo			1										111
Plumbaginaceae	Armeria maritima (Mill.) Willd.	Piuke lawenb											1		88, 89
Plumbaginaceae	Limonium brasiliense (Boiss.) Kuntze	Guaycurú						1					1		65, 89, 115, 118
Poaceae	Amelichloa ambigua (Speg.) Arriaga & Barkworth	Paja vizcachera						1							118
Poaceae	Amelichloa brachychaeta (Godr.) Arriaga & Barkworth	Pasto puna						1							71, 118
Poaceae	Andropogon bicornis L.							1					1		48, 74
Poaceae	Andropogon lateralis Nees												1		75
Poaceae	Aristida adscensionis L.	Pasto, Pasto flecha			1										46
Poaceae	Aristida mendocina Phil.	Flechilla, Flechilla crespa, Pasto crespo			1					1			1		30, 92, 96, 118
Poaceae	Aristida oligospira (Hack.) Henrard												1		75
Poaceae	Aristida pallens Cav.							1							75
Poaceae	Axonopus compressus (Sw.) P.Beauv.				1								1	1	47, 48, 74
Poaceae	Bothriochloa springfieldii (Gould) Parodi	Pasto, Pasto de hoja			1										46, 92
Poaceae	Bouteloua aristidoides (Kunth) Griseb.	Pastito			1										111
Poaceae	Bouteloua curtipendula (Michx.) Torr.	Pastos de cerro			1										13
Poaceae	Bouteloua megapotamica (Spreng.) Kuntze	Pasto, Paja fina			1										46
Poaceae	Bromus catharticus Vahl	Cebadilla, Loica loi, Trigo	1		1										56, 92, 118
Poaceae	Cenchrus chilensis (E.Desv.) Morrone	Esporal, Espuro			1			1							13, 66
Poaceae	Cenchrus echinatus L.												1		68, 74, 75, 76
Poaceae	Cenchrus longispinus (Hack.) Fernald												1		76
Poaceae	Cenchrus myosuroides Kunth	Cadillo			1						1		1		75, 76, 105, 110, 111
Poaceae	Cenchrus pilcomayensis (Mez) Morrone	Pasto natural, Pasto simbol, Simbol			1			1							46, 76, 105, 111
Poaceae	Cenchrus spinifex Cav.	Roseta			1								1		46, 74
Poaceae	Chloris barbata Sw.	Pasto crespo			1										111
Poaceae	Chloris castilloniana Lillo & Parodi	Gramarrode, Pasto crespo, Pasto plumerillo			1										105, 111
Poaceae	Chloris halophila Parodi	Pastos de cerro			1										13
Poaceae	Chusquea culeou E.Desv.	Brote de caña colihue, Caña, Caña colihue, Colihue, Quila	1							1			1		21, 56, 57, 58, 60, 63
Poaceae	Chusquea ramosissima Lindm.	Crisiuma, Tacuarembó						1		1			1		22, 47, 49, 50, 52, 53, 54, 75
Poaceae	Cinnagrostis curvula (Wedd.) P.M.Peterson, Soreng, Romasch. & Barberá	Pastos de cerro			1										13
Poaceae	Cinnagrostis rigescens (J.Presl) P.M.Peterson, Soreng, Romasch. & Barberá	Pastos de cerro			1										13
Poaceae	Coleataenia prionitis (Nees) Soreng							1							48, 68, 69, 75, 76
Poaceae	Cortaderia araucana Stapf	Cola de zorro						1						1	27, 115
Poaceae	Cortaderia hieronymi (Kuntze) N.P.Barker & H.P.Linder	Sevenguilla, Sivinguilla			1										13
Poaceae	Cortaderia selloana (Schult. & Schult.f.) Asch. & Graebn.	Cola de zorro, Cortadera	1		1			1					1	1	33, 36, 37, 38, 41, 42, 46, 68, 71, 76, 115, 118
Poaceae	Cortaderia speciosa (Nees & Meyen) Stapf	Cortadera			1			1					1		66
Poaceae	Deschampsia eminens (J.Presl) Saarela	Pastos de cerro			1										13
Poaceae	Digitaria californica (Benth.) Henrard	Pasto plateado			1										118
Poaceae	Digitaria insularis (L.) Fedde	Camalote, Pasto amargo, Pasto bandera			1										105, 111
Poaceae	Diplachne fusca (L.) P.Beauv. ex Roem. & Schult.	Pasto			1										111
Poaceae	Disakisperma dubium (Kunth) P.M.Peterson & N.W.Snow	Pasto, Pastos de cerro			1										13, 46
Poaceae	Distichlis spicata (L.) Greene	Pasto salado			1										118
Poaceae	Elionurus muticus (Spreng.) Kuntze	Aibe, Aibel, Espartillo, Pasto aibe, Pasto amargo			1			1			1		1		30, 68, 69, 74, 76, 103, 105, 111, 118
Poaceae	Elionurus tripsacoides Humb. & Bonpl. ex Willd.	Jaigua			1			1					1		13, 68, 69, 76
Poaceae	Elymus magellanicus (E.Desv.) A.Löve							1							72
Poaceae	Eragrostis andicola R.E.Fr.	Pastos de cerro			1										13
Poaceae	Eragrostis mexicana (Hornem.) Link	Gramilla			1										92
Poaceae	Eragrostis orthoclada Hack.	Pasto, Pastura			1										46
Poaceae	Eriochloa punctata (L.) Desv. ex Ham.	Pasto amargo			1										111
Poaceae	Erioneuron avenaceum (Kunth) Tateoka	Pastos de cerro			1										13
Poaceae	Eustachys retusa (Lag.) Kunth	Pasto ¨tipo¨ gramilla			1										46
Poaceae	Festuca chrysophylla Phil.	Iro						1							66
Poaceae	Festuca gracillima Hook.f.							1							72
Poaceae	Festuca hieronymi Hack.	Temble									1				14
Poaceae	Festuca pallescens (St.-Yves) Parodi	Coirón												1	19
Poaceae	Gouinia latifolia (Griseb.) Vasey	Pasto natural, Sorguillo			1										105
Poaceae	Gouinia paraguayensis (Kuntze) Parodi	Pasto natural, Sorguillo			1										105, 111
Poaceae	Guadua chacoensis (Rojas) Londoño & P.M.Peterson						1	1					1		47, 48, 50, 52, 68, 73, 74, 75, 76, 107
Poaceae	Guadua paraguayana Döll	Picanilla						1							6, 68
Poaceae	Guadua trinii (Nees) Nees ex Rupr.	Tacuara						1					1		22, 47, 48, 50, 52, 75
Poaceae	Gymnopogon spicatus (Spreng.) Kuntze	Tacuarilla								1			1		68, 74, 100
Poaceae	Gynerium sagittatum (Aubl.) P.Beauv.							1							69, 75
Poaceae	Hordeum comosum J.Presl	Cola de zorro												1	19
Poaceae	Hordeum pubiflorum Hook.f.								1						115
Poaceae	Imperata brasiliensis Trin.							1							68
Poaceae	Imperata contracta (Kunth) Hitchc.	Pasto cola 'i caballo			1										111
Poaceae	Jarava ichu Ruiz & Pav.	Coirón fino, Paja, Paja blanca, Paja brava, Paja dura, Paja gruesa			1			1							13, 46, 92, 118
Poaceae	Jarava leptostachya (Griseb.) F.Rojas	Paja, Paja cumbrera			1										46
Poaceae	Jarava neaei (Nees ex Steud.) Peñailillo	Flechilla			1										92
Poaceae	Leptochloa crinita (Lag.) P.M.Peterson & N.W.Snow	Cola de caballo, Pasto crespo, Pasto de hoja, Pasto natural, Pasto plumerillo			1										96, 105, 111, 118
Poaceae	Leptochloa fusca (L.) Kunth	Pasto natural			1										46
Poaceae	Leptochloa pluriflora (E.Fourn.) P.M. eterson & N.W.Snow	Pasto crespo, Pasto natural			1										105, 111
Poaceae	Leptochloa virgata (L.) P.Beauv.				1										105
Poaceae	Louisiella elephantipes (Nees ex Trin.) Zuloaga	Pasto del agua			1										111
Poaceae	Melica macra Nees				1										71
Poaceae	Merostachys claussenii Munro	Tacuara, Takuapí					1	1	1	1			1		22, 47, 48, 49, 50, 52, 53, 75
Poaceae	Muhlenbergia alopecuroides (Griseb.) P.M.Peterson & Columbus	Pastos de cerro			1										13
Poaceae	Muhlenbergia ciliata (Kunth) Trin.	Pastos de cerro			1										13
Poaceae	Nassella catamarcensis Torres	Cebadilla			1										46
Poaceae	Nassella hyalina (Nees) Barkworth	Cola 'e zorro			1										111
Poaceae	Nassella tenuis (Phil.) Barkworth	Flechilla fina, Flechilla negra, Pasto fino			1									1	19, 92, 96
Poaceae	Panicum bergii Arechav.	Paja voladora			1										118
Poaceae	Panicum trichanthum Nees	Pasto liendre			1										111
Poaceae	Panicum tricholaenoides Steud.	Cola de caballo del seco											1		53, 54
Poaceae	Panicum urvilleanum Kunth	Ajo macho, Tupe			1			1							92, 93, 96, 118
Poaceae	Pappophorum caespitosum R.E.Fr.	Pasto de hoja			1										96
Poaceae	Pappophorum pappiferum (Lam.) Kuntze	Cola de zorro, Pluma de indio			1			1							76, 105, 118
Poaceae	Pappophorum phillippianum Parodi	Pasto de hoja			1										92
Poaceae	Pappostipa humilis (Cav.) Romasch.	Coirón duro												1	19
Poaceae	Pappostipa ibarii (Phil.) Romasch.												1		115
Poaceae	Pappostipa speciosa (Trin. & Rupr.) Romasch.	Coirón, Coirón duro			1									1	19, 96
Poaceae	Pappostipa vaginata (Phil.) Romasch.	Coirón			1										92
Poaceae	Paspalum almum Chase	Bramilla			1					1					76, 111
Poaceae	Paspalum conjugatum P.J.Bergius	Pasto amargo			1										111
Poaceae	Paspalum distichum L.									1			1		74
Poaceae	Paspalum humboldtianum Flüggé	Pastos de cerro			1										13
Poaceae	Paspalum malacophyllum Trin.	Pasto			1										46
Poaceae	Paspalum notatum Flüggé	Grama colorada, Gramilla, Pasto, Pasto horqueta			1								1	1	33, 46, 75, 76
Poaceae	Paspalum quadrifarium Lam.							1							71
Poaceae	Paspalum quarinii Morrone & Zuloaga							1							48
Poaceae	Paspalum simplex Morong				1										111
Poaceae	Paspalum unispicatum (Scribn. & Merr.) Nash	Pasto miel			1										105
Poaceae	Pharus lappulaceus Aubl.												1		47, 75
Poaceae	Poa calchaquiensis Hack.	Pasto			1										46
Poaceae	Poa lanuginosa Poir.	Pasto hebra, Pasto hilo, Unquillo			1									1	19, 92, 96
Poaceae	Poa ligularis Nees ex Steud.	Pasto fino												1	19
Poaceae	Saccharum trinii (Hack.) Renvoize							1							48, 75, 76
Poaceae	Schizachyrium condensatum (Kunth) Nees												1		74
Poaceae	Schizachyrium microstachyum (Desv. ex Ham.) Roseng., B.R.Arrill. & Izag.	Paja colorada						1					1		33, 47, 48, 68, 74
Poaceae	Schizachyrium spicatum (Spreng.) Herter	Pasto colorado			1										118
Poaceae	Setaria cordobensis R.A.W.Herrm.	Pasto			1										46
Poaceae	Setaria fiebrigii R.A.W.Herrm.				1										111
Poaceae	Setaria lachnea (Nees) Kunth	Cola de zorro, Pasto de hoja, Pasto natural			1										96, 105
Poaceae	Setaria macrostachya Kunth	Cadillo			1										46
Poaceae	Setaria mendocina Phil.	Pasto de hoja			1										92, 96
Poaceae	Setaria pampeana Parodi ex Nicora	Cola de zorro, Pasto natural			1			1							105
Poaceae	Setaria parviflora (Poir.) Kerguélen	Cola de zorro grande, Pasto morao, Pasto natural			1										46, 105, 111
Poaceae	Setaria sulcata Raddi												1		75
Poaceae	Sorghastrum pellitum (Hack.) Parodi	Pasto vaca											1		33
Poaceae	Sorghastrum setosum (Griseb.) Hitchc.							1							68
Poaceae	Sporobolus cf. spartinus (Trin.) P.M.Peterson & Saarela			1									1		106, 107
Poaceae	Sporobolus indicus (L.) R.Br.	Esporobolo						1		1					33, 69
Poaceae	Sporobolus monandrus Roseng., B.R.Arrill. & Izag.	Pasto			1										111
Poaceae	Sporobolus phleoides Hack.	Pastos de cerro			1										13
Poaceae	Sporobolus rigens (Trin.) E.Desv.	Junquillo, Unco						1							92, 118
Poaceae	Stapfochloa elata (Desv.) P.M.Peterson							1							48, 75
Poaceae	Stapfochloa parvispicula (Caro & E.A.Sánchez) P.M.Peterson	Pasto			1										111
Poaceae	Steinchisma hians (Elliott) Nash				1										111
Poaceae	Tripogonella spicata (Nees) P.M.Peterson & Romasch.	Pastito			1										111
Podocarpaceae	Podocarpus parlatorei Pilg.	Pino del cerro, Pino criollo	1					1							39, 61
Polygalaceae	Monnina dictyocarpa Griseb.	Monina, Quelén											1		33, 93, 95, 118
Polygonaceae	Coccoloba spinescens Morong	Duraznillo del agua, Duraznillo del ciénego	1		1			1							90, 111, 112
Polygonaceae	Coccoloba tiliacea Lindau	Álamo de campo			1										13
Polygonaceae	Muehlenbeckia hastulata (Sm.) I.M.Johnst.	Quilo, Quineo, Zarparrilla	1										1		56, 57, 58, 95
Polygonaceae	Muehlenbeckia sagittifolia (Ortega) Meisn.	Zarzamora, Zarzaparrilla, Zarza parrilla colorada, Jazmín	1										1		23, 36, 68, 69, 71, 74, 100
Polygonaceae	Muehlenbeckia tamnifolia (Kunth) Meisn.	Jazmín		1											39
Polygonaceae	Polygonum acuminatum Kunth	Duraznillo, Durazno de agua, Sanguinaria			1								1		33, 46, 67, 76
Polygonaceae	Polygonum brasiliense K.Koch												1		71
Polygonaceae	Polygonum hispidum Kunth	Pata 'i chajá			1								1	1	76, 82, 111
Polygonaceae	Polygonum hydropiperoides Michx.	Cataí, Duraznillo del agua											1		74, 81, 100
Polygonaceae	Polygonum punctatum Elliott	Ajicillo, Catay, Erva de bicho, Pimienta acuática, Sanguinaria, Vinagrillo			1						1		1		33, 44, 47, 53, 54, 68, 69, 74, 75, 76, 109, 110, 111
Polygonaceae	Rumex cuneifolius Campd.	Lengua de vaca						1					1		33, 71
Polygonaceae	Rumex obovatus Danser												1		71
Polygonaceae	Rumex paraguayensis D.Parodi	Lengua de vaca, Szczaw	1										1		55, 74
Polygonaceae	Ruprechtia apetala Wedd.	Chicharra, Chuluca, Churrusca, Juda, Judas, Manzano del campo			1			1	1				1		9, 32, 33, 34, 45, 46, 79, 81, 85, 122, 124
Polygonaceae	Ruprechtia laxiflora Meisn.								1						47
Polygonaceae	Salta triflora (Griseb.) Adr.Sánchez	Duraznillo, Duraznillo del bordo, Duraznillo del campo			1			1	1	1			1		5, 105, 109, 110, 111, 112, 113, 114, 119, 120
Polypodiaceae	Campyloneurum aglaolepis (Alston) de la Sota	Canchalagua, Poli poli, Pori pori											1		42
Polypodiaceae	Campyloneurum nitidum (Kaulf.) C.Presl												1		47
Polypodiaceae	Microgramma squamulosa (Kaulf.) de la Sota	Calaguala, Canchalagua, Kaleguala, Poli poli, Pori pori			1								1		13, 41, 42, 47
Polypodiaceae	Microgramma vacciniifolia (Langsd. & Fisch.) Copel.												1		30, 68, 74, 75, 76, 107
Polypodiaceae	Pleopeltis macrocarpa (Bory ex Willd.) Kaulf.	Calaguala, Canchalagua, Kaleguala, Poli poli, Pori pori			1								1		13, 42
Polypodiaceae	Pleopeltis minima (Bory) J.Prado & R.Y.Hirai												1		47
Polypodiaceae	Pleopeltis pinnatifida Gillies ex Hook. & Grev.	Colita de alacrán								1					44
Polypodiaceae	Pleopeltis pleopeltifolia (Raddi) Alston									1			1		47
Polypodiaceae	Serpocaulon lasiopus (Klotzsch) A.R.Sm.	Colita de alacrán								1					44
Pontederiaceae	Pontederia azurea Sw.	Camalote	1												23
Pontederiaceae	Pontederia crassipes Mart.	Aguape, Camalote, Camalote del agua	1		1			1					1		23, 68, 74, 75, 82, 100, 111
Portulacaceae	Portulaca cryptopetala Speg.												1		68
Portulacaceae	Portulaca grandiflora Hook.		1					1							68, 76
Portulacaceae	Portulaca papulosa Schltdl.												1		71
Portulacaceae	Portulaca umbraticola Kunth	Verdolaga			1			1							105
Primulaceae	Myrsine balansae (Mez) Otegui							1							48, 50
Primulaceae	Myrsine coriacea (Sw.) R.Br.	Yuruma						1							50, 61
Primulaceae	Myrsine laetevirens (Mez) Arechav.										1				52
Primulaceae	Samolus valerandi L.	Arambola blanca											1		33
Proteaceae	Embothrium coccineum J.R.Forst. & G.Forst.	Ciruelo, Notro											1	1	21, 25, 58, 63, 97
Proteaceae	Gevuina avellana Molina	Avellano	1												58
Proteaceae	Lomatia hirsuta (Lam.) Diels	Radal											1	1	21, 25, 58, 63, 88, 89
Proteaceae	Roupala montana Aubl.												1		75
Pteridaceae	Adiantopsis chlorophylla (Sw.) Fée	Ala de cuervo, Cilantro del campo, Culandrillo								1			1		41, 42, 68
Pteridaceae	Adiantopsis dichotoma (Sw.) T.Moore												1		75
Pteridaceae	Adiantum chilense Kaulf.	Culandrillo											1		58
Pteridaceae	Adiantum lorentzii Hieron.	Culandrillo								1			1		42, 44
Pteridaceae	Adiantum orbignyanum Mett. ex Kuhn	Culandrillo, Culantrillo								1			1		33, 44
Pteridaceae	Adiantum poiretii Wikstr.	Cilantro del campo, Culandrillo, Culantrillo								1			1		33, 41, 44
Pteridaceae	Adiantum pseudotinctum Hieron.	Culantrillo											1		47, 53, 100
Pteridaceae	Adiantum raddianum C.Presl	Culandrillo, Culantrillo								1			1		12, 33, 54, 64, 68, 71, 74, 76
Pteridaceae	Argyrochosma flava (Hook.) M.Kessler & A.R.Sm.												1		68
Pteridaceae	Argyrochosma nivea (Poir.) Windham	Culandrillo			1					1			1		9, 122, 124
Pteridaceae	Cheilanthes glauca (Cav.) Mett.	Doradilla											1		24, 97
Pteridaceae	Cheilanthes micropteris Sw.												1		75
Pteridaceae	Cheilanthes obducta Mett. ex Kuhn	Doradilla								1			1		110, 119
Pteridaceae	Cheilanthes pruinata Kaulf.	Chucho, Chujcho									1				14
Pteridaceae	Doryopteris concolor (Langsd. & Fisch.) Kuhn									1			1		74, 75, 107
Pteridaceae	Doryopteris nobilis (T.Moore) C.Chr.												1		47
Pteridaceae	Doryopteris triphylla (Lam.) H.Christ	Helecho negrillo, Negrillo			1										46
Pteridaceae	Gastoniella chaerophylla (Desv.) Li Bing Zhang & Liang Zhang									1					107
Pteridaceae	Hemionitis tomentosa (Lam.) Raddi	Doradilla								1			1	1	47, 51, 53, 54, 74
Pteridaceae	Myriopteris myriophylla (Desv.) J.Sm.	Doradilla, Doradilla fina, Doradilla gruesa											1		65, 93, 95
Pteridaceae	Myriopteris notholaenoides (Desv.) Grusz & Windham	Doradilla								1			1		119
Pteridaceae	Pellaea ternifolia (Cav.) Link	Chucho, Chujcho									1				14
Pteridaceae	Vittaria lineata (L.) Sm.													1	51
Ranunculaceae	Anemone decapetala Ard.	Cebolla del zorro, Centella			1					1			1		33, 46, 83
Ranunculaceae	Anemone multifida Poir.	Anémona											1		58, 88
Ranunculaceae	Clematis bonariensis Juss. ex DC.												1		75
Ranunculaceae	Clematis campestris A.St.-Hil.	Barba de viejo			1								1		119, 124
Ranunculaceae	Clematis haenkeana C.Presl	Barba de chivo											1		41
Ranunculaceae	Clematis montevidensis Spreng.	Aloconte, Barba de chivo, Barba 'e chivato, Barba 'e chivo, Barba 'i chivo, Barba de indio, Barba de viejo, Cabello de ángel, Loconte, Loconti			1					1	1		1		20, 74, 75, 76, 83, 84, 85, 86, 105, 107, 109, 110, 111, 113
Ranunculaceae	Ranunculus bonariensis Poir.												1		74
Ranunculaceae	Thalictrum decipiens Boivin	Albaquilla de campo											1		33
Rhamnaceae	Colletia hystrix Clos												1		88
Rhamnaceae	Colletia spinosissima J.F.Gmel.	Barba de indio, Tola, Tola tola			1				1				1		33, 46, 64, 65, 81, 84, 117, 123
Rhamnaceae	Condalia buxifolia Reissek	Piquillín, Piquillín de la sierra	1		1			1	1						7, 45, 46, 79, 99, 108
Rhamnaceae	Condalia microphylla Cav.✤	Piquillín	1		1			1	1				1		11, 15, 29, 33, 34, 45, 46, 59, 77, 79, 92, 93, 94, 96, 102, 103, 105, 108, 118, 124
Rhamnaceae	Condalia montana A.Cast.	Piquillín			1				1				1		45, 46, 122
Rhamnaceae	Discaria americana Gillies & Hook.	Brusquilla						1					1		33, 71, 118
Rhamnaceae	Discaria chacaye (G.Don) Tortosa	Chacay							1				1		10, 88
Rhamnaceae	Ochetophila trinervis (Gillies ex Hook. & Arn.) Poepp. ex Miers	Chacai, Chacay							1				1		10, 16, 17, 27, 91, 97
Rhamnaceae	Retanilla patagonica (Speg.) Tortosa	Barba chivo, Malaspina, Palmalahuén							1				1		91, 104
Rhamnaceae	Sarcomphalus mistol (Griseb.) Hauenschild	Mistol, Mistol café, Mistol de la sierra	1		1			1	1	1			1	1	4, 7, 8, 9, 11, 29, 30, 32, 34, 45, 46, 65, 68, 69, 76, 85, 90, 98, 102, 103, 105, 106, 108, 110, 111, 112, 113, 114, 119, 120, 122, 124
Rhamnaceae	Scutia buxifolia Reissek	Coronillo	1						1				1		106, 107, 117
Rosaceae	Acaena caespitosa Gillies ex Hook. & Arn.	Cadillo de la sierra, Calaguala membrillero											1		95
Rosaceae	Acaena confertissima Bitter							1							115
Rosaceae	Acaena integerrima Gillies ex Hook. & Arn.							1							115
Rosaceae	Acaena magellanica (Lam.) Vahl	Abrojo						1					1		58, 115
Rosaceae	Acaena myriophylla Lindl.	Cadillo											1		67, 71
Rosaceae	Acaena ovalifolia Ruiz & Pav.	Abrojo, Cadillo						1					1		21, 58, 72, 115
Rosaceae	Acaena pinnatifida Ruiz & Pav.	Abrojo, Cardillo de la sierra, Pimpinela											1		21, 58, 115
Rosaceae	Acaena platyacantha Speg.												1		115
Rosaceae	Acaena sericea J.Jacq.							1					1		115
Rosaceae	Acaena splendens Hook. & Arn.	Cepa caballo, Cepa de caballo, Césped caballo											1		21, 24, 26, 27, 58, 88, 89, 97
Rosaceae	Fragaria chiloensis (L.) Mill.	Frutilla, Frutilla silvestre, Quellén	1							1			1		21, 56, 57, 58, 60, 63, 72
Rosaceae	Kageneckia lanceolata Ruiz & Pav.	Durazno del campo, Sacha durazno							1				1		33, 79
Rosaceae	Margyricarpus pinnatus (Lam.) Kuntze	Huevito de la perdíz, Manzanita, Monte de la perdíz, Perlilla, Perlita, Rompe piedra, Yerba de la perdíz	1		1								1		12, 25, 26, 32, 33, 35, 46, 58, 64, 65, 71, 81, 92, 97, 118, 123
Rosaceae	Polylepis australis Bitter	Queñua, Tabaquillo							1				1		33, 42, 79
Rosaceae	Potentilla chiloensis (L.) Mabb.	Frutilla	1										1		59, 88, 89, 115
Rosaceae	Prunus chamissoana Koehne							1							49
Rosaceae	Prunus subcoriacea (Chodat & Hassl.) Koehne							1					1		49, 75
Rosaceae	Rubus geoides Sm.		1												72
Rosaceae	Rubus imperialis Cham. & Schltdl.	Mora, Mora silvestre	1					1							39, 61
Rosaceae	Rubus schottii Pohl ex Focke									1					49, 52
Rosaceae	Rubus sellowii Cham. & Schltdl.	Drapaczyna, Frutilla de monte, Jezynki, Mora, Mora del monte, Morita	1							1			1		47, 49, 52, 53, 55
Rosaceae	Tetraglochin alata (Gillies ex Hook. & Arn.) Kuntze	Coronilla, Puelneneo, Yerba de la perdiz											1		89, 104
Rosaceae	Tetraglochin cristata (Britton) Rothm.	Canguia, Choco canglia, Choque canglia, Choquecanguia			1								1		13, 66
Rubiaceae	Borreria poaya (A.St.-Hil.) DC.												1		75
Rubiaceae	Calycophyllum multiflorum Griseb.									1					114
Rubiaceae	Cephalanthus glabratus (Spreng.) K.Schum.												1		74
Rubiaceae	Chomelia obtusa Cham. & Schltdl.												1		75
Rubiaceae	Deppea blumenaviensis (K.Schum.) Lorence							1							49
Rubiaceae	Galianthe brasiliensis (Spreng.) E.L.Cabral & Bacigalupo									1			1		47, 52
Rubiaceae	Galianthe centranthoides (Cham. & Schltdl.) E.L.Cabral	Charrúa											1		68, 74, 100
Rubiaceae	Galianthe eupatorioides (Cham. & Schltdl.) E.L.Cabral									1			1		74
Rubiaceae	Galium eriocarpum Bartl. ex DC.	Yerba del pollo											1		58
Rubiaceae	Galium hypocarpium (L.) Endl. ex Griseb.							1							49
Rubiaceae	Galium megapotamicum Spreng.							1							49
Rubiaceae	Galium nigroramosum (Ehrend.) Dempster							1							49
Rubiaceae	Galium richardianum (Gillies ex Hook. & Arn.) Endl. ex Walp.	Relvún						1							49, 118
Rubiaceae	Genipa americana L.	Ñandytá						1							22
Rubiaceae	Geophila repens (L.) I.M.Johnst.												1		47
Rubiaceae	Manettia luteo-rubra (Vell.) Benth.												1		47
Rubiaceae	Mitracarpus megapotamicus (Spreng.) Kuntze	Peladilla											1		33, 119
Rubiaceae	Oreopolus glacialis (Poepp.) Ricardi	Calaguala											1		95
Rubiaceae	Psychotria leiocarpa Cham. & Schltdl.							1					1		47, 49
Rubiaceae	Randia ferox (Cham. & Schltdl.) DC.								1						47
Rubiaceae	Richardia brasiliensis Gomes	Pastos de cerro			1										13
Rubiaceae	Staelia virgata (Link ex Roem. & Schult.) K.Schum.												1		119
Rutaceae	Balfourodendron riedelianum (Engl.) Engl.							1	1				1		47, 48, 50, 75
Rutaceae	Helietta apiculata Benth.							1	1				1		47, 48, 75
Rutaceae	Pilocarpus pennatifolius Lem.	Cutiera						1	1	1			1		47, 48, 53, 74, 75
Rutaceae	Zanthoxylum caribaeum Lam.												1		75
Rutaceae	Zanthoxylum coco Gillies ex Hook.f. & Arn.	Coco, Cochucho, Sauco						1	1			1	1		12, 32, 33, 42, 45, 61, 64, 79, 80, 81, 83, 99, 124
Rutaceae	Zanthoxylum fagara (L.) Sarg.							1					1		68, 69, 74, 75
Rutaceae	Zanthoxylum petiolare A.St.-Hil. & Tul.	Naranjillo						1	1				1		42, 47, 49, 74, 75
Rutaceae	Zanthoxylum rhoifolium Lam.	Sauco, Sauco hediondo, Sauquillo						1	1				1		41, 42, 47, 74
Salicaceae	Azara lanceolata Hook.f.	Aromo, Corcolán, Corcolén								1					21
Salicaceae	Azara microphylla Hook.f.	Chin-chin											1		58
Salicaceae	Banara tomentosa Clos								1						47
Salicaceae	Casearia decandra Jacq.								1						47
Salicaceae	Casearia sylvestris Sw.												1		68, 75
Salicaceae	Salix humboldtiana Willd.	Sauce, Sauce amargo, Sauce común, Sauce criollo, Sauce llorón			1			1	1	1			1		2, 6, 8, 12, 23, 32, 36, 42, 45, 46, 68, 69, 71, 74, 76, 79, 80, 91, 101, 107, 109, 110, 111, 112, 114, 124
Salicaceae	Xylosma longipetiolata Legname	Supa supa						1							61
Salicaceae	Xylosma pubescens Griseb.	Alfiler, Coronillo							1						45
Salicaceae	Xylosma tweediana (Clos) Eichler	Azucará											1		53
Salicaceae	Xylosma venosa N.E.Br.												1		74
Salviniaceae	Azolla filiculoides Lam.	Cresta de gallo, Lanteja, Luchecito			1					1			1		30, 46, 58, 105, 111, 114
Salviniaceae	Salvinia minima Baker	Lanteja			1										111
Santalaceae	Acanthosyris falcata Griseb.	Sacha pera, Sauce, Sombra de toro	1		1			1		1			1		4, 30, 68, 69, 76, 90, 105, 106, 111, 113, 114, 119, 120
Santalaceae	Acanthosyris spinescens (Mart. & Eichler) Griseb.		1												73
Santalaceae	Jodina rhombifolia (Hook. & Arn.) Reissek	Quebracho flojo, Quinchirín, Peje, Rombo, Sombra de lomo, Sombra de toro			1			1	1	1	1		1	1	8, 9, 23, 32, 33, 35, 45, 64, 65, 74, 76, 79, 80, 81, 83, 84, 87, 102, 103, 105, 107, 122, 123, 124
Santalaceae	Myoschilos oblongum Ruiz & Pav.	Orocoipo											1		121
Santalaceae	Phoradendron argentinum Urb.												1		74
Santalaceae	Phoradendron bathyoryctum Eichler	Corpo, Liga, Liga del mistol, Liguilla, Yerba de pajarito			1								1		47, 53, 68, 74, 85, 109, 110, 111
Santalaceae	Phoradendron quadrangulare (Kunth) Griseb.	Corpo, Liga, Liga del árbol			1					1			1		68, 74, 105, 109, 110, 111, 114, 119
Santalaceae	Phoradendron tucumanensis Urb.	Suelda con suelda											1		42
Sapindaceae	Allophylus edulis (A.St.-Hil., A.Juss. & Cambess.) Hieron. ex Niederl.	Cocu, Cocú, Cocum, Chal chal, Chalchal, Chanchal, Doradilla	1		1				1				1		2, 8, 39, 45, 46, 47, 53, 54, 55, 68, 69, 73, 74, 75, 100, 107
Sapindaceae	Allophylus guaraniticus (A.St.-Hil.) Radlk.		1										1		47, 68, 69, 73, 74, 75
Sapindaceae	Cardiospermum corindum L.	Globito											1		9, 119
Sapindaceae	Cardiospermum halicacabum L.	Globito, Pedorra			1			1		1			1		33, 47, 50, 105, 112, 114, 122, 124
Sapindaceae	Cupania vernalis Cambess.	Camboatá						1					1		48, 49, 53
Sapindaceae	Diatenopteryx sorbifolia Radlk.	María preta, Suiquillo						1	1		1		1		42, 47, 48, 52, 53, 75
Sapindaceae	Diplokeleba floribunda N.E.Br.							1					1		68, 107
Sapindaceae	Dodonaea viscosa Jacq.	Chacatea											1		42
Sapindaceae	Matayba elaeagnoides Radlk.							1							48, 49
Sapindaceae	Melicoccus lepidopetalus Radlk.		1										1		74, 75
Sapindaceae	Paullinia elegans Cambess.							1							68
Sapindaceae	Paullinia pinnata L.										1				73
Sapindaceae	Sapindus saponaria L.	Palo bolilla			1								1		74, 111
Sapindaceae	Serjania meridionalis Cambess.										1				47, 52
Sapindaceae	Thinouia mucronata Radlk.										1		1		47, 52
Sapindaceae	Urvillea chacoensis Hunz.									1			1		107, 114, 119
Sapindaceae	Urvillea pterocarpa (Radlk.) Acev.-Rodr. & Ferrucci												1		74
Sapindaceae	Urvillea ulmacea Kunth										1				52
Sapindaceae	Urvillea uniloba Radlk.							1							68
Sapotaceae	Chrysophyllum gonocarpum (Mart. & Eichler) Engl.	Aguaí	1					1	1				1		39, 42, 47, 48, 50, 68, 69, 73, 75, 100
Sapotaceae	Chrysophyllum marginatum (Hook. & Arn.) Radlk.		1										1		73, 74, 75
Sapotaceae	Pouteria gardneriana (A.DC.) Radlk.		1												68, 69, 73, 75
Sapotaceae	Sideroxylon obtusifolium (Roem. & Schult.) T.D.Penn.	Molle	1		1			1	1				1		4, 30, 47, 68, 69, 76, 90, 106, 109, 110, 111, 112, 113, 119
Schoepfiaceae	Arjona patagonica Hombr. & Jacq. ex Decne.		1												72, 115
Schoepfiaceae	Arjona tuberosa Cav.	Chaquil, Macachín, Macachín del trigo, Mata trigo, Papa de los arenales, Papita de los arenales	1	1											21, 26, 57, 58, 59, 63, 94, 115, 118
Schoepfiaceae	Quinchamalium chilense Molina	Quinchamalí, Quinchamarí											1		21, 58, 62, 63, 88, 121
Scrophulariaceae	Buddleja araucana Phil.	Pañil											1		25, 26, 27, 58, 63, 93, 95
Scrophulariaceae	Buddleja cordobensis Griseb.	Pulmonaria, Salvia blanca, Salvialora, Sanalotodo			1								1		9, 12, 33, 34, 64, 65, 87, 122, 124
Scrophulariaceae	Buddleja globosa Hope	Matico, Pañil											1		21, 28, 58, 62, 89, 97, 104, 121
Scrophulariaceae	Buddleja mendozensis Benth.	Salvia blanca			1								1		33, 46, 81, 86, 95
Scrophulariaceae	Buddleja stachyoides Cham. & Schltdl.	San Juan c'ora											1		42, 74, 75, 76, 107
Scrophulariaceae	Buddleja tucumanensis Griseb.	San Juan Cora, San Juan c'ora			1								1		13, 41, 42
Selaginellaceae	Selaginella sellowii Hieron.	Aishpa'pela, Musguito, Pelo de tierra			1						1				105, 111
Simaroubaceae	Castela coccinea Griseb.	Meloncillo, Mistol de cabra, Mistolillo, Mistol del zorro, Pata, Sacha melón			1			1	1	1			1	1	34, 46, 76, 85, 98, 103, 105, 107, 110, 111, 114, 119, 120, 124
Simaroubaceae	Castela tweedii Planch.												1		74
Simaroubaceae	Picrasma crenata (Vell.) Engl.	Palo amargo, Pau amargo							1	1			1		47, 53, 54, 75
Smilacaceae	Smilax campestris Griseb.	Uña de gato, Zalsaparrilla, Zarzamora, Zarzaparrilla	1					1					1		1, 7, 20, 42, 47, 53, 65, 68, 74, 75, 100, 101, 107
Solanaceae	Brunfelsia australis Benth.			1											73, 75
Solanaceae	Brunfelsia pilosa Plowman													1	48
Solanaceae	Capsicum baccatum L.	Ají puta parió		1									1		68, 69, 73, 74, 76, 90
Solanaceae	Capsicum chacoense Hunz.			1	1					1			1		4, 11, 29, 30, 33, 64, 65, 68, 69, 76, 81, 83, 90, 103, 105, 106, 108, 109, 110, 112, 113, 114, 118, 119, 124
Solanaceae	Capsicum eximium Hunz.	Ají urpica, Ulupica		1											39
Solanaceae	Capsicum flexuosum Sendtn.			1											73
Solanaceae	Cestrum laevigatum Schltdl.								1						47
Solanaceae	Cestrum lorentzianum Griseb.	Hediondilla											1		20, 116
Solanaceae	Cestrum parqui L'Hér.	Duraznillo, Duraznillo negro, Hediondilla, Palque huerta, Palqui			1			1		1	1		1		1, 32, 33, 34, 35, 58, 64, 68, 76, 79, 81, 83, 84, 85, 93, 99, 103, 105, 107, 110, 122, 123, 124
Solanaceae	Cestrum strigilatum Ruiz & Pav.												1		76
Solanaceae	Fabiana densa J.Remy	Tolilla							1						66
Solanaceae	Fabiana imbricata Ruiz & Pav.	Palo piche, Palo de piche, Palo pichi, Pichi	1						1				1	1	24, 25, 26, 27, 28, 35, 58, 59, 62, 63, 64, 65, 67, 88, 89, 91, 97, 104, 121
Solanaceae	Fabiana patagonica Speg.	Pichanilla											1		93
Solanaceae	Fabiana peckii Niederl.	Pichanilla, Siete camisas			1				1						17, 92
Solanaceae	Fabiana punensis S.C.Arroyo	Tolilla							1						3
Solanaceae	Iochroma australe Griseb.	Sermonilla			1										13
Solanaceae	Jaborosa integrifolia Lam.												1		71, 74
Solanaceae	Lycianthes asarifolia (Kunth & Bouché) Bitter		1												4, 90
Solanaceae	Lycianthes lycioides (L.) Hassl.	Chirimoye			1										13
Solanaceae	Lycium ameghinoi Speg.✤	Monte negro, Yao yín	1						1					1	16, 19, 115
Solanaceae	Lycium americanum Jacq.	Chivil de burro	1		1				1						4, 5, 106, 111
Solanaceae	Lycium boerhaviaefolium L.f.	Burro micuna, Fruto de paloma		1	1								1		68, 69, 76, 111, 124
Solanaceae	Lycium cestroides Schltdl.	Chil, Hediondilla, Ischivil, Picoyuyo, Piscoyuyo, Tala rundún	1		1			1	1				1		41, 45, 46, 87, 103, 105
Solanaceae	Lycium chanar Phil.	Acerillo							1						3
Solanaceae	Lycium chilense Miers ex Bertero	Llaulín, Laullin de víbora, Monte negro, Yaoyín, Yauyín	1		1			1	1				1		16, 59, 89, 92, 95, 96, 118
Solanaceae	Lycium ciliatum Schltdl.	Ichil, Piquillín víbora, Piquillín de la víbora			1								1		9, 105, 122, 124
Solanaceae	Lycium cuneatum Dammer								1						5
Solanaceae	Lycium elongatum Miers	Gualeguay			1								1		122, 124
Solanaceae	Lycium gilliesianum Miers	Llaulín crespo, Monte negro, Piquillín de víbora, Yaoyín negro			1			1	1						16, 92, 96, 118
Solanaceae	Lycium nodosum Miers	Chivil	1		1								1		90, 111, 119
Solanaceae	Lycium tenuispinosum Miers	Yauyín bravo, Yauyín espinoso			1										118
Solanaceae	Nicandra physalodes (L.) Gaertn.	Tocor								1					40
Solanaceae	Nicotiana glauca Graham	Cacala, Kjarallanta, Palán, Palancho, Palán palán, Palán-palán			1			1	1	1	1		1		1, 9, 12, 20, 23, 30, 36, 38, 43, 44, 45, 64, 67, 68, 69, 71, 74, 76, 77, 81, 84, 85, 101, 102, 103, 105, 107, 110, 112, 113, 114, 116, 119, 122, 123, 124
Solanaceae	Nicotiana longiflora Cav.	Flor de sapo, Tabaco 'el monte, Tabaco yuyo, Yerba de sapo	1		1								1		20, 46, 69, 71, 76, 107, 111, 119, 124
Solanaceae	Nicotiana noctiflora Hook.✤	Tabaco, Tabaco cimarrón									1				92, 118
Solanaceae	Nicotiana paa Mart.Crov.	Tabaco, Tabaco cimarrón								1	1		1		76, 107, 118
Solanaceae	Nierembergia linariaefolia Graham	Chucho, Chuscho			1					1	1		1		74, 83, 84, 85, 118, 122, 124
Solanaceae	Nierembergia pulchella Gillies ex Miers	Mío-mío, Romerillo, Romerillo chico, Romerillo grande									1				14
Solanaceae	Pantacantha ameghinoi Speg.	Palo de piche											1		95
Solanaceae	Petunia axillaris (Lam.) Britton, Stern & Poggenb.	Asna asna, Bocinita, Campanilla, Campanita, Pepinia del campo, Tabaco de indio			1					1	1		1		1, 14, 33, 46
Solanaceae	Physalis pubescens L.		1												4
Solanaceae	Physalis viscosa L.	Globito, Meloncillo, Pocote 'e perro	1										1		4, 11, 65, 68, 69, 71, 73, 74, 75, 76, 109
Solanaceae	Salpichroa origanifolia (Lam.) Baill.	Frutilla del campo, Huevito de gallo, Pisingallo, Uvilla, Uvita del campo	1		1					1			1		7, 20, 23, 29, 68, 69, 71, 74, 76, 81, 101, 106, 107, 108, 123, 124
Solanaceae	Solanum americanum Mill.												1		47, 54
Solanaceae	Solanum argentinum Bitter & Lillo	Afata, Cabra yuyo, Cabrayuyo, Duraznillo, Duraznillo blanco, Duraznillo del burro, Malfato, Naranjito del campo, Yuyo negro			1			1		1	1		1	1	9, 30, 34, 46, 85, 98, 105, 110, 111, 112, 113, 114, 119, 124
Solanaceae	Solanum aridum Morong	Pocote de perro, Pocote 'e perro, Pocoto i perro, Sacha pocoto			1								1		30, 105, 109, 110, 111, 113
Solanaceae	Solanum atropurpureum Schrank	Espina colorada											1		54
Solanaceae	Solanum betaceum Cav.	Chato, Chilto, Tomate de árbol, Tomate del monte, Tomatito	1					1					1		23, 39, 41, 61
Solanaceae	Solanum bonariense L.												1		76
Solanaceae	Solanum chacoense Bitter	Papilla			1								1		46, 76
Solanaceae	Solanum chenopodioides Lam.		1					1			1		1		69, 71, 74, 75
Solanaceae	Solanum commersonii Dunal ex Poir.												1		76
Solanaceae	Solanum crispum Ruiz & Pav.	Natre, Natri											1		24, 27, 35, 58, 63, 89, 121
Solanaceae	Solanum elaeagnifolium Cav.	Quillo, Revienta caballo			1			1					1		30, 85, 92, 118, 124
Solanaceae	Solanum glaucophyllum Desf.	Corcho'el agua							1	1			1	1	5, 30, 68, 82, 110, 113
Solanaceae	Solanum granulosum-leprosum Dunal	Fumo bravo											1		47, 53
Solanaceae	Solanum hieronymi Kuntze	Pocote	1		1					1			1		4, 30, 90, 110, 111, 113, 114
Solanaceae	Solanum mauritianum Scop.												1		68, 75
Solanaceae	Solanum nitidibaccatum Bitter												1		88
Solanaceae	Solanum palinacanthum Dunal	Pocote, Pocoto, Sandía del zorro			1						1		1		105, 110, 111
Solanaceae	Solanum palitans C.V.Morton	Ñusco, Ñusco blanco			1								1		1, 13, 20, 42
Solanaceae	Solanum paniculatum L.	Jurubeba											1		53
Solanaceae	Solanum pilcomayense Morong												1		74
Solanaceae	Solanum pseudocapsicum L.												1		71, 75
Solanaceae	Solanum sisymbriifolium Lam.	Espina colorada, Jua, Kjana, Revienta caballo, Tomate del campo, Tomatillo, Tutía, Tutiá, Vila vila, Vira-vira	1	1	1			1		1			1		1, 2, 4, 9, 30, 32, 33, 34, 35, 39, 42, 43, 53, 54, 55, 61, 64, 65, 67, 68, 69, 71, 73, 74, 75, 76, 81, 82, 90, 100, 101, 105, 106, 107, 110, 111, 113, 114, 119, 123
Solanaceae	Solanum trichoneuron Lillo	Hediondilla											1		42
Solanaceae	Solanum tripartitum Dunal	Ñusco						1					1	1	44, 66
Solanaceae	Solanum tucumanense Griseb.	Hediondilla											1		42
Solanaceae	Solanum valdiviense Dunal												1		21
Solanaceae	Solanum viarum Dunal	Jua											1		47, 53, 54
Solanaceae	Vassobia breviflora (Sendtn.) Hunz.	Piscoyuyo, Piscoyuyo blanco, Pucanche, Pucancho, Uchucho	1		1			1			1		1		39, 42, 46, 61, 68, 69, 74, 75, 76
Styracaceae	Styrax leprosus Hook. & Arn.	Carne de vaca						1					1		48, 53, 54
Thelypteridaceae	Amauropelta recumbens (Rosenst.) Salino & T.E.Almeida									1					47
Thelypteridaceae	Goniopteris riograndensis (Lindm.) Ching												1		47
Thymelaeaceae	Daphnopsis racemosa Griseb.							1							52
Thymelaeaceae	Ovidia andina (Poepp. & Endl.) Meisn.	Palo hediondo, Pillo-pillo											1		21, 58
Tropaeolaceae	Tropaeolum incisum (Speg.) Sparre												1		89
Tropaeolaceae	Tropaeolum patagonicum Speg.✤		1												115
Tropaeolaceae	Tropaeolum porifolium (Cav.) L.Andersson & S.Andersson	Curuhuilla	1												57
Typhaceae	Typha domingensis Pers.	Totora	1		1			1					1		68, 69, 71, 74, 76, 106, 110, 111, 118
Typhaceae	Typha latifolia L.	Totora						1							71, 118
Typhaceae	Typha subulata Crespo & R.L.Pérez-Mor.	Totora						1					1		74, 118
Ulmaceae	Phyllostylon rhamnoides (J.Poiss.) Taub.	Palo amarillo		1	1			1							68, 69, 90, 111
Urticaceae	Boehmeria caudata Sw.	Rupa grande, Suncho redondo								1			1		41
Urticaceae	Cecropia pachystachya Trécul	Ambay, Amba'y, Palo de lija							1				1		8, 9, 32, 35, 43, 47, 53, 54, 64, 65, 74, 75, 100, 122
Urticaceae	Urera aurantiaca Wedd.												1		74
Urticaceae	Urera baccifera (L.) Gaudich.	Ortiga colorada, Ortiga grande, Ortiga manguera	1					1		1			1		47, 48, 50, 53, 54, 69, 73, 74, 75, 114
Urticaceae	Urera caracasana (Jacq.) Gaudich. ex Griseb.	Itapalla, Orteguilla											1		42
Urticaceae	Urtica circularis (Hicken) Sorarú	Ortiga, Ortiga chica, Rupachico			1								1		46, 47, 53, 54, 74
Urticaceae	Urtica gracilis Aiton	Ortiga crespa											1		33
Urticaceae	Urtica magellanica Poir.	Ortiga											1		21, 88
Urticaceae	Urtica spatulata Sm.	Ortiga, Ortiguita											1		33, 100
Verbenaceae	Acantholippia seriphioides (A.Gray) Moldenke✤	Hierba del lagarto, Tomillo, Tomillo del campo, Tomillo hembra, Tomillo de olor, Tomillo patagónico, Tomillo silvestre		1	1								1		26, 57, 58, 59, 89, 92, 93, 94, 95, 96, 104, 115, 118
Verbenaceae	Aloysia citrodora Palau	Cedrón, Cedrón árbol, Cedrón en rama, Reina luisa, Yerba Luisa		1									1	1	1, 2, 8, 9, 11, 20, 23, 27, 32, 35, 36, 37, 38, 41, 42, 43, 53, 54, 64, 65, 67, 74, 77, 81, 87, 93, 94, 95, 100, 101, 116, 122, 123
Verbenaceae	Aloysia decipiens Ravenna												1		107
Verbenaceae	Aloysia deserticola (Phil.) Lu-Irving & O'Leary	Rica-rica							1						3
Verbenaceae	Aloysia gratissima (Gillies & Hook. ex Hook.) Tronc.	Cedrón del cerro, Erva pontada, Ka'a ovecha, Palo amarillo, Palo amarillo hembra, Palo amarillo macho, Palo ángel, Poleo del campo, Pronto alivio, Usillo, Yerba de la oveja		1	1			1	1				1	1	9, 11, 12, 32, 33, 34, 44, 46, 53, 64, 65, 67, 68, 74, 75, 76, 77, 79, 81, 84, 85, 87, 100, 105, 107, 110, 119, 122, 123, 124
Verbenaceae	Aloysia polystachya (Griseb.) Moldenke	Burrito, Burro, Burro ka'a, Burro macho, Cedrón poleo, Poleo, Poleo blanco, Poleo del burro, Poleo de la casa, Poleo salteño, Té de burro	1	1						1		1	1	1	1, 2, 8, 9, 11, 12, 20, 23, 30, 32, 34, 35, 36, 37, 38, 42, 53, 54, 64, 65, 67, 74, 76, 77, 81, 83, 87, 93, 94, 95, 100, 103, 105, 107, 109, 110, 116, 122, 123
Verbenaceae	Aloysia salsoloides (Griseb.) Lu-Irving & O'Leary	Rica rica											1		1, 2, 41, 42
Verbenaceae	Aloysia scorodonioides (Kunth) Cham.	Palo ángel, Poleo del campo			1										105
Verbenaceae	Aloysia virgata (Ruiz & Pav.) Pers.							1					1		48, 74
Verbenaceae	Diostea juncea (Gillies & Hook. ex Hook.) Miers	Retamo												1	27, 28
Verbenaceae	Duranta serratifolia (Griseb.) Kuntze	Cocán, Espinillo, Supar	1										1		39, 42
Verbenaceae	Glandularia aristigera (S.Moore) Tronc.												1		30
Verbenaceae	Glandularia dissecta (Willd. ex Spreng.) Schnack & Covas	Verbena											1		9
Verbenaceae	Glandularia flava (Gillies & Hook. ex Hook.) Schnack & Covas	Yerba de la vaca			1										92, 96
Verbenaceae	Glandularia peruviana (L.) Small	Margarita, Margarita punzó, Sangre de Cristo, Santa Margarita punzó	1		1					1			1		33, 46, 68, 74, 76, 102, 103, 106, 107, 118
Verbenaceae	Glandularia platensis (Spreng.) Schnack & Covas	Verbena blanca								1			1		33
Verbenaceae	Glandularia tenera (Spreng.) Cabrera	Fumaria											1		65
Verbenaceae	Glandularia tweedieana (Niven ex Hook.) P.Peralta	Margarita			1								1		30, 110, 111
Verbenaceae	Junellia hookeriana (Covas & Schnack) N.O'Leary & P.Peralta	Verbena, Violeta			1								1		44, 124
Verbenaceae	Junellia seriphioides (Gillies & Hook. ex Hook.) Moldenke	Tomillo macho, Tomillón			1			1							92, 93
Verbenaceae	Lantana achyranthifolia Desf.							1							107
Verbenaceae	Lantana aff. camara L.	Melisa											1		1
Verbenaceae	Lantana balansae Briq.									1			1		33, 69, 74, 76
Verbenaceae	Lantana camara L.	Bandera española, Camará, Fosforito, Lantana, Salvia											1	1	26, 36, 38, 47, 69
Verbenaceae	Lantana fucata Lindl.	Lantana de la sierra											1		33
Verbenaceae	Lantana grisebachii Stuck. ex Seckt	Lantana de la sierra											1		33
Verbenaceae	Lantana megapotamica (Spreng.) Tronc.	Lantana de la sierra											1		33
Verbenaceae	Lantana montevidensis (Spreng.) Briq.									1			1		68, 69, 107
Verbenaceae	Lippia alba (Mill.) N.E.Br. ex Britton & P.Wilson	Cedrón árbol, Grecia, Salvia, Salvia de Castilla											1		38, 42, 53, 67, 69, 74, 76, 100, 107, 110, 113
Verbenaceae	Lippia brasiliensis (Link) T.Silva	Yateí caá											1		54
Verbenaceae	Lippia integrifolia (Griseb.) Hieron.	Inca-yuyo, Incayuyo, Sacha poleo	1		1			1					1		9, 11, 20, 34, 44, 64, 65, 67, 81, 108, 116, 122, 124
Verbenaceae	Lippia junelliana (Moldenke) Tronc.	Salvia, Salvia de campo, Salvia lora			1								1		46, 81, 85
Verbenaceae	Lippia lippioides (Cham.) Rusby		1												73, 75
Verbenaceae	Lippia lupulina Cham.												1		75
Verbenaceae	Lippia turbinata Griseb.	Poleo, Poleo hembra, Poleo macho, Poleo santiagueño		1	1			1					1		8, 11, 12, 15, 20, 32, 33, 35, 43, 64, 65, 67, 74, 77, 81, 83, 84, 85, 87, 93, 95, 101, 102, 103, 105, 116, 118, 119, 122, 123, 124
Verbenaceae	Lippia turnerifolia Cham.	Pastos de cerro			1										13
Verbenaceae	Mulguraea aspera (Gillies & Hook. ex Hook.) N.O'Leary & P.Peralta	Monte blanco, Monte negro, Yaoyín de vaca			1								1		62, 92, 96
Verbenaceae	Mulguraea tridens (Lag.) N.O'Leary & P.Peralta							1	1						115
Verbenaceae	Neosparton aphyllum (Gillies & Hook. ex Hook.) Kuntze	Matasebo, Retamilla, Solupe			1			1	1						16, 92, 93, 118
Verbenaceae	Neosparton ephedroides Griseb.	Badre							1						3
Verbenaceae	Phyla nodiflora (L.) Greene	Mosko yuyo			1			1					1		74, 109, 110, 111, 112
Verbenaceae	Stachytarpheta cayennensis (Rich.) Vahl	Colita de tatu, Verbena											1		42, 47, 74, 75, 100
Verbenaceae	Verbena bonariensis L.	Verbena											1		33, 37, 64, 74, 81
Verbenaceae	Verbena gracilescens (Cham.) Herter												1		71
Verbenaceae	Verbena hispida Ruiz & Pav.	Verbena, Yerbina macho			1								1		1, 13, 41
Verbenaceae	Verbena intermedia Gillies & Hook. ex Hook.	Verbena											1		33, 37, 71, 74
Verbenaceae	Verbena litoralis Kunth	Jervao, Verbena, Verbena morada, Vervena											1		30, 41, 42, 44, 47, 53, 54, 64, 74, 81
Verbenaceae	Verbena montevidensis Spreng.	Verbena, Vervena											1		54, 75
Verbenaceae	Verbena rigida Spreng.	Verbena											1		37, 44
Viburnaceae	Sambucus australis Cham. & Schltdl.	Sauco	1										1		33, 53, 54, 64, 65, 71, 73, 74, 75, 84, 107
Viburnaceae	Sambucus peruviana Kunth	Molulo						1					1		41, 42, 61
Violaceae	Pombalia bigibbosa (A.St.-Hil.) Paula-Souza													1	52
Violaceae	Pombalia parviflora (Mutis ex L.f.) Paula-Souza	Mautecillo, Pastos de cerro			1								1		13, 33
Violaceae	Pombalia serrata (Phil.) Paula-Souza✤	Mautecillo											1		33
Violaceae	Viola atropurpurea Leyb.	Escarapela											1		95
Violaceae	Viola maculata Cav.	Oreja de ratón, Violeta amarilla											1		21, 58, 88, 89
Vitaceae	Cissus palmata Poir.	Zarzaparrilla								1			1		110, 114, 119
Vitaceae	Cissus striata Ruiz & Pav.	Zarzamora											1		53
Vitaceae	Cissus sulcicaulis (Baker) Planch.												1		47
Vitaceae	Cissus tweediana (Baker) Griseb.	Viña del zorro											1		83
Vitaceae	Cissus verticillata (L.) Nicolson & C.E.Jarvis	Sipo insulina											1		47, 53
Winteraceae	Drimys winteri J.R.Forst. & G.Forst.	Canelillo, Canelo						1		1	1		1		21, 58, 72
Zygophyllaceae	Bulnesia foliosa Griseb.	Afata, Palo santo			1			1			1				105, 111, 120
Zygophyllaceae	Bulnesia retama (Gillies ex Hook. & Arn.) Griseb.	Retama, Retamo						1	1				1		15, 65
Zygophyllaceae	Gonopterodendron bonariensis (Griseb.) A.C.Godoy-Bürki												1		30
Zygophyllaceae	Gonopterodendron sarmientoi (Lorentz ex Griseb.) A.C.Godoy-Bürki	Palo santo		1	1			1		1			1		30, 64, 65, 68, 69, 74, 78, 82, 107, 109, 110, 111, 112, 113, 114, 119, 120
Zygophyllaceae	Kallstroemia tucumanensis Descole, O'Donell & Lourteig				1										105
Zygophyllaceae	Larrea ameghinoi Speg.	Jarilla arrastrada											1		104
Zygophyllaceae	Larrea cuneifolia Cav.	Jarilla, Jarilla crespa, Jarilla macho			1			1	1				1		15, 20, 85, 92, 95, 116, 118, 124
Zygophyllaceae	Larrea divaricata Cav.	Jarilla, Jarilla lisa			1			1	1	1			1		8, 12, 18, 20, 32, 33, 34, 64, 65, 67, 81, 83, 84, 85, 87, 92, 93, 95, 98, 103, 116, 118, 122, 124
Zygophyllaceae	Larrea nitida Cav.	Jarilla, Jarilla crespa						1	1	1			1	1	16, 18, 27, 93, 95, 104, 118
Zygophyllaceae	Porlieria microphylla (Baill.) Descole, O'Donell & Lourteig	Árbol de la cruz, Caspicuchara, Chucupi, Cucharero, Frutilla negra, Guayacán, Monte crespo, Pan de cata, Yapan del monte			1			1	1	1			1	1	12, 13, 15, 33, 34, 46, 64, 76, 77, 79, 81, 84, 87, 107, 122, 123, 124

## Sheet: Table S3
Supplementary Table S3
Weighted Relative Importance Index (RI) of useful species in Argentina
Endemic species are marked with (✤)
Useful native species	RI_ARG
Dysphania ambrosioides (L.) Mosyakin & Clemants	0.589865
Schinus group (Schinus areira L. + Schinus molle L.)	0.384425
Aloysia citrodora Palau	0.382409
Solanum sisymbriifolium Lam.	0.364593
Aloysia polystachya (Griseb.) Moldenke	0.360344
Ilex paraguariensis A.St.-Hil.	0.359342
Geoffroea decorticans (Gillies ex Hook. & Arn.) Burkart	0.3475
Fabiana imbricata Ruiz & Pav.	0.340469
Xanthium spinosum L.	0.335292
Equisetum giganteum L.	0.332565
Clinopodium gilliesii (Benth.) Kuntze	0.312553
Vachellia caven (Molina) Seigler & Ebinger	0.288025
Vachellia aroma (Gillies ex Hook. & Arn.) Seigler & Ebinger	0.279097
Celtis group (Celtis tala Gillies ex Planch. + Celtis pallida Torr.)	0.278933
Nicotiana glauca Graham	0.277134
Chenopodium quinoa Willd.	0.276441
Berberis microphylla G.Forst.	0.275833
Cyclolepis genistoides Gillies ex D.Don	0.268382
Ephedra ochreata Miers	0.268333
Passiflora caerulea L.	0.262502
Baccharis salicifolia (Ruiz & Pav.) Pers.	0.258574
Celtis iguanaea (Jacq.) Sarg.	0.255553
Ribes magellanicum Poir.	0.251389
Gunnera tinctoria (Molina) Mirb.	0.249722
Lippia turbinata Griseb.	0.248961
Bauhinia forficata Link	0.243254
Baccharis trimera (Less.) DC.	0.241216
Achyrocline satureioides (Lam.) DC.	0.239024
Salvia cuspidata Ruiz & Pav.	0.235469
Salix humboldtiana Willd.	0.233423
Lepidium didymum L.	0.233242
Azorella prolifera (Cav.) G.M.Plunkett & A.N.Nicolas	0.231111
Maytenus boaria Molina	0.22937
Alternanthera pungens Kunth	0.227694
Ephedra triandra Tul. emend. J.H.Hunz.	0.220378
Larrea divaricata Cav.	0.21976
Adesmia boronioides Hook.f.	0.219167
Dysphania mandonii (S.Watson) Mosyakin & Clemants	0.21875
Equisetum bogotense Kunth	0.2175
Eugenia uniflora L.	0.217478
Neltuma alba (Griseb.) C.E.Hughes & G.P.Lewis	0.212661
Schinus johnstonii F.A.Barkley✤	0.201036
Aristotelia chilensis (Molina) Stuntz	0.198611
Tagetes minuta L.	0.198562
Cucurbita maxima Duchesne	0.197843
Cestrum parqui L'Hér.	0.195917
Smilax campestris Griseb.	0.194422
Valeriana carnosa Sm.	0.188333
Plantago australis Lam.	0.188247
Margyricarpus pinnatus (Lam.) Kuntze	0.185152
Atriplex lampa (Moq.) D.Dietr.✤	0.183333
Baccharis sagittalis (Less.) DC.	0.177222
Ligaria cuneifolia (Ruiz & Pav.) Tiegh.	0.17664
Condalia microphylla Cav.✤	0.17465
Neltuma nigra (Griseb.) C.E.Hughes & G.P.Lewis	0.1746
Solanum crispum Ruiz & Pav.	0.173889
Aspidosperma quebracho-blanco Schltdl.	0.173165
Commelina erecta L.	0.172872
Sida rhombifolia L.	0.172489
Araujia odorata (Hook. & Arn.) Fontella & Goyder	0.172325
Bidens andicola Kunth	0.170833
Minthostachys verticillata (Griseb.) Epling✤	0.170431
Fragaria chiloensis (L.) Mill.	0.168889
Baccharis articulata (Lam.) Pers.	0.167334
Cortaderia selloana (Schult. & Schult.f.) Asch. & Graebn.	0.166963
Buddleja globosa Hope	0.166111
Araucaria araucana (Molina) K.Koch	0.163056
Salpichroa origanifolia (Lam.) Baill.	0.163035
Petiveria alliacea L.	0.162131
Canna indica L.	0.161772
Baccharis coridifolia DC.	0.16094
Schinus patagonica (Phil.) I.M.Johnst. ex Cabrera	0.160556
Allophylus edulis (A.St.-Hil., A.Juss. & Cambess.) Hieron. ex Niederl.	0.159614
Sphaeralcea bonariensis (Cav.) Griseb.	0.155859
Senecio filaginoides DC.	0.155556
Quinchamalium chilense Molina	0.155
Solidago chilensis Meyen	0.154272
Porlieria microphylla (Baill.) Descole, O'Donell & Lourteig	0.153817
Apium australe Thouars	0.152222
Sanicula graveolens Poepp. ex DC.	0.151944
Euphorbia serpens Kunth	0.150523
Chusquea culeou E.Desv.	0.149444
Parasenegalia visco (Lorentz ex Griseb.) Seigler & Ebinger	0.148074
Atamisquea emarginata Miers ex Hook. & Arn.	0.147561
Ribes cucullatum Hook. & Arn.	0.146667
Ephedra americana Humb. & Bonpl. ex Willd.	0.146592
Azorella monantha Clos	0.146111
Aloysia gratissima (Gillies & Hook. ex Hook.) Tronc.	0.143922
Acantholippia seriphioides (A.Gray) Moldenke✤	0.141667
Grindelia chiloensis (Cornel.) Cabrera	0.140278
Pluchea sagittalis (Lam.) Cabrera	0.140113
Lippia integrifolia (Griseb.) Hieron.	0.139146
Schinus marchandii F.A.Barkley	0.138889
Strombocarpa ferox (Griseb.) C.E.Hughes & G.P.Lewis	0.138889
Austrocedrus chilensis (D.Don) Pic.Serm. & Bizzarri	0.138333
Solanum palitans C.V.Morton	0.138194
Ochetophila trinervis (Gillies ex Hook. & Arn.) Poepp. ex Miers	0.137778
Oxalis adenophylla Gillies ex Hook. & Arn.	0.136667
Bidens pilosa L.	0.135007
Trixis divaricata (Kunth) Spreng.	0.132213
Neltuma denudans (Benth.) C.E.Hughes & G.P.Lewis✤	0.131944
Erythranthe glabrata (Kunth) G.L.Nesom	0.131303
Larrea nitida Cav.	0.130556
Tagetes filifolia Lag.	0.129914
Verbena hispida Ruiz & Pav.	0.129861
Monteverdia ilicifolia (Mart. ex Reissek) Biral	0.128548
Jodina rhombifolia (Hook. & Arn.) Reissek	0.127568
Schinus odonellii F.A.Barkley	0.126667
Arjona tuberosa Cav.	0.126667
Larrea cuneifolia Cav.	0.126576
Parthenium hysterophorus L.	0.12591
Physalis viscosa L.	0.124295
Parkinsonia praecox (Ruiz & Pav. ex Hook.) Hawkins	0.124101
Sarcomphalus mistol (Griseb.) Hauenschild	0.123796
Plantago tomentosa Lam.	0.123358
Chrysophyllum gonocarpum (Mart. & Eichler) Engl.	0.123247
Centaurium cachanlahuen (Molina) B.L.Rob.	0.122778
Vassobia breviflora (Sendtn.) Hunz.	0.12209
Psidium guajava L.	0.119688
Schinus fasciculatus (Griseb.) I.M.Johnst.	0.118754
Anarthrophyllum rigidum (Gillies ex Hook. & Arn.) Hieron.	0.118056
Cecropia pachystachya Trécul	0.118016
Parapiptadenia excelsa (Griseb.) Burkart	0.116772
Senna aphylla (Cav.) H.S.Irwin & Barneby	0.116246
Lippia alba (Mill.) N.E.Br. ex Britton & P.Wilson	0.115655
Tripodanthus acutifolius (Ruiz & Pav.) Tiegh.	0.11565
Alstroemeria patagonica Phil.	0.115556
Nicotiana longiflora Cav.	0.11422
Baccharis boliviensis (Wedd.) Cabrera	0.113889
Senna birostris (Dombey ex Vogel) H.S.Irwin & Barneby	0.113889
Berberis darwinii Hook.	0.113611
Baccharis dracunculifolia DC.	0.11283
Colliguaja integerrima Gillies & Hook.	0.112778
Hedeoma multiflora Benth.	0.112056
Acaena splendens Hook. & Arn.	0.111667
Tessaria absinthioides (Hook. & Arn.) DC.	0.111111
Schkuhria pinnata (Lam.) Kuntze ex Thell.	0.11072
Phyllanthus sellowianus (Klotzsch) Müll.Arg.	0.110481
Dolichandra unguis-cati (L.) L.G.Lohmann	0.110139
Tecoma stans (L.) Juss. ex Kunth	0.109028
Conyza bonariensis (L.) Cronquist	0.108184
Parastrephia quadrangularis (Meyen) Cabrera	0.107639
Hypericum connatum Lam.	0.107218
Sambucus australis Cham. & Schltdl.	0.106881
Luma apiculata (DC.) Burret	0.106111
Enterolobium contortisiliquum (Vell.) Morong	0.105916
Lycium chilense Miers ex Bertero	0.105556
Cenchrus chilensis (E.Desv.) Morrone	0.105556
Tetraglochin cristata (Britton) Rothm.	0.105556
Opuntia sulphurea Gillies ex Salm-Dyck	0.105194
Neltuma flexuosa (DC.) C.E.Hughes & G.P.Lewis	0.1051
Tabebuia nodosa (Griseb.) Griseb.	0.104818
Spegazziniophytum patagonicum (Speg.) Esser	0.104167
Chuquiraga erinacea D.Don	0.104167
Cedrela angustifolia DC.	0.104167
Heimia salicifolia Link	0.10409
Microgramma squamulosa (Kaulf.) de la Sota	0.103611
Blepharocalyx salicifolius (Kunth) O.Berg	0.103525
Azorella trifurcata (Gaertn.) Pers.	0.102778
Chenopodium hircinum Schrad.	0.102778
Aechmea distichantha Lem.	0.102617
Neltuma ruscifolia (Griseb.) C.E.Hughes & G.P.Lewis	0.101947
Sapium haematospermum Müll.Arg.	0.101723
Diposis patagonica Skottsb.✤	0.101667
Solanum betaceum Cav.	0.100694
Lithraea molleoides (Vell.) Engl.	0.100432
Cantinoa mutabilis (Rich.) Harley & J.F.B.Pastore	0.100342
Gaillardia megapotamica (Spreng.) Baker	0.100198
Maihueniopsis darwinii (Hensl.) F.Ritter	0.1
Senecio nutans Sch.Bip.	0.1
Xenophyllum poposa (Phil.) V.A.Funk	0.0993056
Capsicum chacoense Hunz.	0.0992857
Clematis montevidensis Spreng.	0.0989776
Aristolochia argentina Griseb.	0.0987395
Muehlenbeckia hastulata (Sm.) I.M.Johnst.	0.0986111
Nassauvia axillaris (Lag. ex Lindl.) D.Don	0.0986111
Tipuana tipu (Benth.) Kuntze	0.0986111
Turnera sidoides L.	0.0973389
Clinopodium darwinii (Benth.) Kuntze	0.0972222
Cyclospermum leptophyllum (Pers.) Britton & P.Wilson	0.0968814
Lomatia hirsuta (Lam.) Diels	0.0966667
Maclura tinctoria (L.) Steud.	0.0963445
Sida cordifolia L.	0.0955742
Gonopterodendron sarmientoi (Lorentz ex Griseb.) A.C.Godoy-Bürki	0.0943838
Elionurus tripsacoides Humb. & Bonpl. ex Willd.	0.0934267
Aloysia salsoloides (Griseb.) Lu-Irving & O'Leary	0.0930556
Neltuma chilensis (Molina) C.E.Hughes & G.P.Lewis	0.0926587
Oxalis valdiviensis Barnéoud	0.0922222
Euphorbia collina Phil.	0.0922222
Juglans australis Griseb.	0.0918242
Buddleja araucana Phil.	0.0916667
Baccharis grisebachii Hieron.	0.0909722
Eryngium paniculatum Cav. & Dombey ex F.Delaroche	0.0905556
Argemone subfusiformis G.B.Ownbey	0.0904645
Monttea aphylla (Miers) Benth. & Hook.	0.0902778
Buddleja tucumanensis Griseb.	0.0902778
Cordia americana (L.) Gottschling & J.S.Mill.	0.0895378
Apium sellowianum H.Wolff	0.0888889
Salvia stachydifolia Benth.	0.0888889
Muehlenbeckia sagittifolia (Ortega) Meisn.	0.0885247
Typha domingensis Pers.	0.0879879
Zinnia peruviana (L.) L.	0.0877965
Parkinsonia aculeata L.	0.0877965
Embothrium coccineum J.R.Forst. & G.Forst.	0.0866667
Handroanthus heptaphyllus (Vell.) Mattos	0.0861111
Empetrum rubrum Vahl ex Willd.	0.085
Airampoa ayrampo (Azara) Doweld	0.0847222
Krameria lappacea (Dombey) Burdet & B.B.Simpson	0.0847222
Acrocomia aculeata (Jacq.) Lodd. ex Mart.	0.0846359
Zanthoxylum coco Gillies ex Hook.f. & Arn.	0.0836251
Syagrus romanzoffiana (Cham.) Glassman	0.0833333
Thaumatophyllum bipinnatifidum (Schott ex Endl.) Sakur., Calazans & Mayo	0.0833333
Corynabutilon bicolor (Phil. ex K.Schum.) Kearney	0.0833333
Ephedra cf. americana Humb. & Bonpl. ex Willd.	0.0833333
Tagetes terniflora Kunth	0.0833333
Senna corymbosa (Lam.) H.S.Irwin & Barneby	0.0829412
Anadenanthera colubrina (Vell.) Brenan	0.0829248
Osmorhiza berteroi DC.	0.0827778
Senecio bonariensis Hook. & Arn.	0.0827778
Diatenopteryx sorbifolia Radlk.	0.0826389
Azorella compacta Phil.	0.0826389
Phytolacca dioica L.	0.0817834
Anemia tomentosa (Savigny) Sw.	0.0816807
Merostachys claussenii Munro	0.0816667
Erythrostemon gilliesii (Wall. ex Hook.) Klotzsch	0.0815243
Fuchsia magellanica Lam.	0.0811111
Dolichandra cynanchoides Cham.	0.0810784
Potentilla chiloensis (L.) Mabb.	0.0808333
Schoenoplectus californicus (C.A.Mey.) Soják	0.080747
Lepidium meyenii Walp.	0.0806081
Alnus acuminata Kunth	0.0798611
Baccharis sculpta Griseb.	0.0798611
Pleopeltis macrocarpa (Bory ex Willd.) Kaulf.	0.0798611
Tillandsia australis Mez	0.0798611
Ximenia americana L.	0.0795752
Ocotea puberula (Rich.) Nees	0.0793056
Buddleja mendozensis Benth.	0.0792834
Jungia polita Griseb.	0.0786473
Myrcianthes pungens (O.Berg) D.Legrand	0.0785773
Amaranthus muricatus (Moq.) Hieron.	0.0780392
Mulguraea aspera (Gillies & Hook. ex Hook.) N.O'Leary & P.Peralta	0.0777778
Jarava ichu Ruiz & Pav.	0.0771359
Ambrosia tenuifolia Spreng.	0.0768534
Holocalyx balansae Micheli	0.0766667
Colletia spinosissima J.F.Gmel.	0.0765173
Chaptalia nutans (L.) Pol.	0.0760481
Libidibia paraguariensis (D.Parodi) G.P.Lewis	0.0756863
Lantana camara L.	0.0738889
Sideroxylon obtusifolium (Roem. & Schult.) T.D.Penn.	0.0736134
Senecio subulatus D.Don ex Hook. & Arn.	0.0736111
Campomanesia xanthocarpa O.Berg	0.0733333
Plantago myosuros Lam.	0.0730451
Dendrophorbium bomanii (R.E.Fr.) C.Jeffrey	0.0729167
Alstroemeria aurea Graham	0.0727778
Nothofagus antarctica (G.Forst.) Oerst.	0.0727778
Schinopsis lorentzii (Griseb.) Engl.	0.0726657
Phlegmariurus saururus (Lam.) B. Øllg.	0.072409
Tristagma patagonicum (Baker) Traub	0.0722222
Suaeda divaricata Moq.	0.0722222
Cedrela fissilis Vell.	0.0716667
Urera baccifera (L.) Gaudich.	0.0713025
Croton argenteus L.	0.0710364
Baccharis crispa Spreng.	0.0710084
Adesmia pinifolia Gillies ex Hook. & Arn.	0.0708333
Senna arnottiana (Gillies ex Hook.) H.S.Irwin & Barneby	0.0708333
Drimys winteri J.R.Forst. & G.Forst.	0.07
Myrocarpus frondosus Allemão	0.07
Plinia peruviana (Poir.) Govaerts	0.07
Acaena ovalifolia Ruiz & Pav.	0.07
Zephyranthes elwesii (C.H.Wright) Nic.García✤	0.0694444
Capparicordis tweediana (Eichler) H.H.Iltis & Cornejo	0.0692857
Tillandsia tenuifolia L.	0.0688889
Rivina humilis L.	0.0687162
Cuphea glutinosa Cham. & Schltdl.	0.0685714
Eugenia pyriformis Cambess.	0.0683333
Berberis empetrifolia Lam.	0.0683333
Elaphoglossum gayanum (Fée) T.Moore	0.0682073
Petunia axillaris (Lam.) Britton, Stern & Poggenb.	0.067507
Thelesperma megapotamicum (Spreng.) Kuntze	0.0674253
Verbena litoralis Kunth	0.0671592
Erythrina crista-galli L.	0.0668814
Blumenbachia dissecta (Hook. & Arn.) Weigend & J.Grau	0.0666667
Cortaderia speciosa (Nees & Meyen) Stapf	0.0666667
Solanum tripartitum Dunal	0.0666667
Viola maculata Cav.	0.0661111
Handroanthus impetiginosus (Mart. ex DC.) Mattos	0.0660889
Cereus stenogonus K.Schum.	0.0660364
Passiflora mooreana Hook.f.	0.0655462
Heliotropium amplexicaule Vahl	0.0654062
Pontederia crassipes Mart.	0.0650187
Aristolochia triangularis Cham.	0.065
Chusquea ramosissima Lindm.	0.065
Passiflora edulis Sims	0.065
Trichilia catigua A.Juss.	0.065
Gomesa bifolia (Sims) M.W.Chase & N.H.Williams	0.0649778
Zanthoxylum rhoifolium Lam.	0.0647222
Araucaria angustifolia (Bertol.) Kuntze	0.0646359
Anisocapparis speciosa (Griseb.) Cornejo & H.HIltis	0.0644538
Zanthoxylum petiolare A.St.-Hil. & Tul.	0.0643056
Guadua chacoensis (Rojas) Londoño & P.M.Peterson	0.0642717
Balbisia gracilis (Meyen) Hunz. & Ariza	0.0638889
Neosparton aphyllum (Gillies & Hook. ex Hook.) Kuntze	0.0638889
Phyllanthus niruri L.	0.0635481
Polygonum punctatum Elliott	0.0634734
Xanthium strumarium L.	0.06345
Plinia rivularis (Cambess.) Rotman	0.0633333
Sorocea bonplandii (Baill.) W.C.Burger, Lanj. & Wess.Boer	0.0633333
Solanum chenopodioides Lam.	0.0627778
Verbesina encelioides (Cav.) Benth. & Hook.f. ex A.Gray	0.0620098
Erythrina falcata Benth.	0.0619444
Scoparia montevidensis (Spreng.) R.E.Fr.	0.0619048
Clinopodium odorum (Griseb.) Harley	0.0618581
Disakisperma dubium (Kunth) P.M.Peterson & N.W.Snow	0.0618581
Pombalia parviflora (Mutis ex L.f.) Paula-Souza	0.0618581
Araujia sericifera Brot.	0.0618581
Acaena pinnatifida Ruiz & Pav.	0.0616667
Pistia stratiotes L.	0.0614192
Ceiba speciosa (A.St.-Hil.) Ravenna	0.0612045
Acaena myriophylla Lindl.	0.0611111
Bromelia balansae Mez	0.06
Diostea juncea (Gillies & Hook. ex Hook.) Miers	0.06
Lathyrus magellanicus Lam.	0.06
Senecio patagonicus Hook. & Arn.	0.06
Bromelia serra Griseb.	0.0595798
Gunnera apiculata Schindl.	0.0590278
Hypolepis poeppigii (Kunze) R.Rodr.	0.0590278
Piper aduncum L.	0.0590278
Sambucus peruviana Kunth	0.0590278
Vasconcellea quercifolia A.St.-Hil.	0.0589414
Bougainvillea stipitata Griseb.	0.0585317
Nectandra angustifolia (Schrad.) Nees & Mart.	0.0583333
Adesmia volckmannii Phil.	0.0583333
Limonium brasiliense (Boiss.) Kuntze	0.0583333
Adesmia cf. miraflorensis J.Remy	0.0583333
Cestrum lorentzianum Griseb.	0.0583333
Chuquiraga acanthophylla Wedd.	0.0583333
Haplopappus rigidus Phil.	0.0583333
Hypochaeris meyeniana (Walp.) Benth. & Hook.f. ex Griseb	0.0583333
Maytenus viscifolia Griseb.	0.0583333
Tarasa antofagastana (Phil.) Krapov.	0.0583333
Vallesia glabra (Cav.) Link	0.0581232
Gleditsia amorphoides (Griseb.) Taub.	0.0577031
Mikania periplocifolia Hook. & Arn.	0.0577031
Achatocarpus praecox Griseb.	0.057381
Poiretia tetraphylla (Poir.) Burkart	0.0571475
Bulnesia retama (Gillies ex Hook. & Arn.) Griseb.	0.0569444
Acanthosyris falcata Griseb.	0.0568487
Cleistocactus baumannii (Lem.) Lem.	0.0568487
Lophophytum leandri Eichler	0.0566667
Adiantum raddianum C.Presl	0.0566153
Justicia tweediana (Nees) Griseb.	0.0563025
Oenothera affinis Cambess.	0.0563025
Baccharis obovata Hook. & Arn.	0.0561111
Geranium berteroanum Colla	0.0561111
Nothofagus dombeyi (Mirb.) Oerst.	0.0561111
Strombocarpa torquata (Cav. ex Lag.) Hutch.✤	0.055894
Lycium cestroides Schltdl.	0.0558182
Anredera cordifolia (Ten.) Steenis	0.0557586
Lycium gilliesianum Miers	0.0555556
Myriopteris myriophylla (Desv.) J.Sm.	0.0555556
Adesmia trijuga Gillies ex Hook. & Arn.	0.0555556
Aldama helianthoides (Rich.) E.E.Schill. & Panero	0.0555556
Astragalus pehuenches Nieder	0.0555556
Bouteloua curtipendula (Michx.) Torr.	0.0555556
Chiliophyllum densifolium Phil.	0.0555556
Chloris halophila Parodi	0.0555556
Chuquiraga longiflora (Griseb.) Hieron.	0.0555556
Chuquiraga oppositifolia D.Don	0.0555556
Cinnagrostis curvula (Wedd.) P.M.Peterson, Soreng, Romasch. & Barberá	0.0555556
Cinnagrostis rigescens (J.Presl) P.M.Peterson, Soreng, Romasch. & Barberá	0.0555556
Coccoloba tiliacea Lindau	0.0555556
Cortaderia hieronymi (Kuntze) N.P.Barker & H.P.Linder	0.0555556
Deschampsia eminens (J.Presl) Saarela	0.0555556
Eragrostis andicola R.E.Fr.	0.0555556
Erioneuron avenaceum (Kunth) Tateoka	0.0555556
Geranium sessiliflorum Cav.	0.0555556
Hypseocharis pimpinellifolia J.Remy	0.0555556
Iochroma australe Griseb.	0.0555556
Lepechinia meyenii (Walp.) Epling	0.0555556
Lippia turnerifolia Cham.	0.0555556
Lycianthes lycioides (L.) Hassl.	0.0555556
Muhlenbergia alopecuroides (Griseb.) P.M.Peterson & Columbus	0.0555556
Muhlenbergia ciliata (Kunth) Trin.	0.0555556
Mutisia ledifolia Decne. ex Wedd.	0.0555556
Myoschilos oblongum Ruiz & Pav.	0.0555556
Oxalis erythrorhiza Gillies ex Hook. & Arn.	0.0555556
Paspalum humboldtianum Flüggé	0.0555556
Puya yakespala A.Cast.	0.0555556
Ribes punctatum Ruiz & Pav.	0.0555556
Richardia brasiliensis Gomes	0.0555556
Sporobolus phleoides Hack.	0.0555556
Tecoma fulva (Cav.) D.Don	0.0555556
Baccharis aliena (Spreng.) Joch.Müll.	0.055042
Campomanesia guazumifolia (Cambess.) O.Berg	0.055
Parapiptadenia rigida (Benth.) Brenan	0.055
Jacaranda mimosifolia D.Don	0.0549136
Buddleja cordobensis Griseb.	0.0543417
Annona rugulosa (Schltdl.) H.Rainer	0.0543056
Neltuma alpataco (Phil.) C.E.Hughes & G.P.Lewis	0.0541667
Cissampelos pareira L.	0.0538434
Heliotropium curassavicum L.	0.0536415
Amomyrtus luma (Molina) D.Legrand & Kausel	0.0533333
Discaria chacaye (G.Don) Tortosa	0.0533333
Nothofagus pumilio (Poepp. & Endl.) Krasser	0.0533333
Pilocarpus pennatifolius Lem.	0.0533333
Elionurus muticus (Spreng.) Kuntze	0.0532773
Pseudognaphalium gaudichaudianum (DC.) Anderb.	0.0529692
Baccharis linearifolia (Lam.) Pers.	0.0529167
Cortaderia araucana Stapf	0.0527778
Lycium ameghinoi Speg.✤	0.0527778
Hyalis argentea D.Don ex Hook. & Arn.	0.0527778
Eugenia myrcianthes Nied.	0.0527031
Cynophalla retusa (Griseb.) Cornejo & H.H.Iltis	0.0526471
Baccharis glutinosa Pers.	0.052605
Opuntia elata Salm-Dyck	0.052479
Berberis ruscifolia Lam.	0.0522409
Lepechinia vesiculosa (Benth.) Epling	0.0520833
Ephedra chilensis C.Presl	0.0516667
Neltuma kuntzei (Harms ex Kuntze) C.E.Hughes & G.P.Lewis	0.0513445
Stetsonia coryne (Salm-Dyck) Britton & Rose	0.0511204
Phacelia secunda J.F.Gmel.	0.0509722
Sapium glandulosum (L.) Morong	0.0509722
Amaranthus viridis L.	0.0504062
Centella asiatica (L.) Urb.	0.05
Dahlstedtia muehlbergiana (Hassl.) M.J.Silva & A.M.G.Azevedo	0.05
Muellera campestris (Mart. ex Benth.) M.J.Silva & A.M.G.Azevedo	0.05
Peltophorum dubium (Spreng.) Taub.	0.05
Rubus sellowii Cham. & Schltdl.	0.05
Vitex megapotamica (Spreng.) Moldenke	0.05
Adesmia horrida Gillies ex Hook. & Arn.	0.05
Adesmia minor (Hook. & Arn.) Burkart	0.05
Aloysia deserticola (Phil.) Lu-Irving & O'Leary	0.05
Artemisia copa Phil.	0.05
Astragalus garbancillo Cav.	0.05
Azorella trisecta (H.Wolff) Mart.Fernández & C.I.Calviño	0.05
Baccharis tola Phil.	0.05
Fabiana densa J.Remy	0.05
Fabiana punensis S.C.Arroyo	0.05
Festuca chrysophylla Phil.	0.05
Hieronymiella clidanthoides Pax	0.05
Ipomoea plummerae A.Gray	0.05
Justicia xylosteoides Griseb.	0.05
Lantana aff. camara L.	0.05
Lycium chanar Phil.	0.05
Mutisia friesiana Cabrera	0.05
Neosparton ephedroides Griseb.	0.05
Parastrephia lucida (Meyen) Cabrera	0.05
Perezia pungens (Humb. & Bonpl.) Less.	0.05
Philibertia parviflora (Malme) Goyder	0.05
Poissonia heterantha (Griseb.) Lavin	0.05
Pseudognaphalium tarapacanum (Phil.) Anderb.	0.05
Senecio santelicis Phil.	0.05
Senecio viridis Phil.	0.05
Tarasa tenella (Cav.) Krapov.	0.05
Trichocereus atacamensis (Phil.) W.T.Marshall & T.M.Bock	0.05
Zephyranthes gilliesiana (Herb.) Nic.García	0.05
Malvastrum coromandelianum (L.) Garcke	0.0497759
Tessaria dodoneifolia (Hook. & Arn.) Cabrera	0.0495156
Castela coccinea Griseb.	0.0490196
Cereus forbesii Otto ex C.F.Först.	0.0490196
Solanum argentinum Bitter & Lillo	0.0490196
Stachytarpheta cayennensis (Rich.) Vahl	0.0489414
Hydrocotyle bonariensis Lam.	0.0488142
Apium panul (Bertero ex DC.) Reiche	0.0486111
Bromus catharticus Vahl	0.0486111
Strombocarpa strombulifera (Lam.) A.Gray	0.0486111
Amomyrtella güili (Speg.) Kausel	0.0486111
Bocconia integrifolia Bonpl.	0.0486111
Caiophora lateritia Klotzsch	0.0486111
Chromolaena hookeriana (Griseb.) R.M.King & H.Rob.	0.0486111
Duranta serratifolia (Griseb.) Kuntze	0.0486111
Oxalis tuberosa Molina	0.0486111
Passiflora umbilicata (Griseb.) Harms	0.0486111
Podocarpus parlatorei Pilg.	0.0486111
Rubus imperialis Cham. & Schltdl.	0.0486111
Salvia atrocyanea Epling	0.0486111
Smallanthus macroscyphus (Baker) A.Grau ex A.A.Sáenz	0.0486111
Tillandsia usneoides (L.) L.	0.0486111
Ullucus tuberosus Caldas	0.0486111
Vernonanthura squamulosa (Hook. & Arn.) H.Rob.	0.0486111
Wedelia brachylepis Griseb.	0.0486111
Adiantopsis chlorophylla (Sw.) Fée	0.0480556
Ficus luschnathiana (Miq.) Miq.	0.0479692
Araujia brachystephana (Griseb.) Fontella & Goyder	0.0477451
Amphilophium carolinae (Lindl.) L.G.Lohmann	0.0476471
Polygonum acuminatum Kunth	0.0473389
Bolax gummifera (Lam.) Spreng.	0.0472222
Opuntia bonaerensis Speg.✤	0.0472222
Copernicia alba Morong	0.0469748
Funastrum gracile (Decne.) Schltr.	0.0469188
Guadua trinii (Nees) Nees ex Rupr.	0.0466667
Hypochaeris chillensis (Kunth) Hieron.	0.0466667
Schnella microstachya Raddi	0.0466667
Cardiospermum halicacabum L.	0.0463445
Tabernaemontana catharinensis A.DC.	0.0463025
Tessaria integrifolia Ruiz & Pav.	0.0462465
Acaena magellanica (Lam.) Vahl	0.0461111
Armeria maritima (Mill.) Willd.	0.0461111
Gaultheria mucronata (L.f.) Hook. & Arn.	0.0461111
Baccharis spartioides (Hook. & Arn. ex DC.) J.Remy	0.0458333
Tillandsia duratii Vis.	0.0455462
Buddleja stachyoides Cham. & Schltdl.	0.045342
Iresine diffusa Humb. & Bonpl. ex Willd.	0.045342
Croton subpannosus Müll.Arg. ex Griseb.	0.0452381
Balfourodendron riedelianum (Engl.) Engl.	0.045
Eugenia involucrata DC.	0.045
Picrasma crenata (Vell.) Engl.	0.045
Chuquiraga avellanedae Lorentz	0.0444444
Nardophyllum bryoides (Lam.) Cabrera	0.0444444
Pentaphorus glutinosus D.Don	0.0444444
Dichondra sericea Sw.	0.0438259
Schinus longifolia (Lindl.) Speg.	0.0435434
Ipomoea carnea Jacq.	0.0434734
Solanum glaucophyllum Desf.	0.0433754
Berberis trigona Kunze ex Poepp. & Endl.	0.0433333
Cordia ecalyculata Vell.	0.0433333
Austrobrickellia patens (D.Don ex Hook. & Arn.) R.M.King & H.Rob.	0.0431606
Annona emarginata (Schltdl.) H.Rainer	0.0429692
Glandularia peruviana (L.) Small	0.0427451
Opuntia quimilo K.Schum.	0.0427171
Pavonia sepium A.St.-Hil.	0.0426389
Psidium guineense Sw.	0.0426389
Anemia australis (Mickel) M.Kessler & A.R.Sm.	0.042437
Croton argentinus Müll.Arg.	0.042437
Gentianella multicaulis (Gillies ex Griseb.) Fabris	0.042437
Phacelia pinnatifida Griseb. ex Wedd.	0.042437
Modiola caroliniana (L.) G.Don	0.0424136
Verbena intermedia Gillies & Hook. ex Hook.	0.0424136
Sarcotoxicum salicifolium (Griseb.) Cornejo & H.H.Iltis	0.0420168
Allophylus guaraniticus (A.St.-Hil.) Radlk.	0.0416667
Opuntia anacantha Speg.	0.0414426
Senegalia praecox (Griseb.) Seigler & Ebinger	0.0413165
Azolla filiculoides Lam.	0.0411531
Solanum pseudocapsicum L.	0.0411111
Achyrocline tomentosa Rusby	0.0410364
Ambrosia artemisiifolia L.	0.0409384
Lycium boerhaviaefolium L.f.	0.0406723
Pterogyne nitens Tul.	0.0406723
Scutia buxifolia Reissek	0.0403828
Cordia trichotoma (Vell.) Arráb. ex Steud.	0.04
Helietta apiculata Benth.	0.04
Maranta sobolifera L.Andersson	0.04
Opuntia arechavaletae Speg.	0.04
Schinus terebinthifolia Raddi	0.04
Tanaecium dichotomum (Jacq.) Kaehler & L.G.Lohmann	0.039944
Baccharis spicata (Lam.) Baill.	0.0396359
Croton serratifolius Baill.	0.0396359
Guilleminea densa (Humb. & Bonpl. ex Schult.) Moq.	0.0396359
Polystichum montevidense (Spreng.) Rosenst.	0.0396359
Oxalis conorrhiza Jacq.	0.0392717
Croton lachnostachyus Baill.	0.0392437
Bromelia hieronymi Mez	0.0392157
Ceiba chodatii (Hassl.) Ravenna	0.0392157
Maihuenia patagonica (Phil.) Britton & Rose	0.0388889
Retanilla patagonica (Speg.) Tortosa	0.0388889
Phoradendron bathyoryctum Eichler	0.0387395
Harrisia bonplandii (Pfeiff.) Britton & Rose	0.0385434
Salta triflora (Griseb.) Adr.Sánchez	0.0385154
Canna glauca L.	0.038352
Boehmeria caudata Sw.	0.0381944
Cuscuta grandiflora Kunth	0.0381944
Rhipsalis lumbricoides (Lem.) Lem. ex Salm-Dyck	0.0379692
Schizachyrium microstachyum (Desv. ex Ham.) Roseng., B.R.Arrill. & Izag.	0.0379692
Dolichandra uncata (Andrews) L.G.Lohmann	0.0378711
Atriplex undulata (Moq.) D.Dietr.	0.0376867
Achyrocline flaccida (Weinm.) DC.	0.0376389
Myrsine coriacea (Sw.) R.Br.	0.0376389
Peperomia tetraphylla Hook. & Arn.	0.0376389
Vriesea friburgensis Mez	0.0376389
Gomphrena mendocina (Phil.) R.E.Fr.	0.0375
Panicum urvilleanum Kunth	0.0375
Tagetes pauciloba DC.✤	0.0375
Bidens subalternans DC.	0.037437
Croton bonplandianus Baill.	0.0372409
Echinopsis rhodotricha K.Schum.	0.0372409
Funastrum clausum (Jacq.) Schltr.	0.0372409
Celtis chichape (Wedd.) Miq.	0.0371148
Polylepis australis Bitter	0.0369106
Acmella decumbens (Sm.) R.K.Jansen	0.0368814
Campuloclinium macrocephalum (Less.) DC.	0.0368814
Verbena bonariensis L.	0.0368814
Acanthostyles buniifolius (Hook. & Arn.) R.M.King & H.Rob.	0.0368581
Anemone multifida Poir.	0.0366667
Austroblechnum penna-marina (Poir.) Gasper & V.A.O.Dittrich	0.0366667
Cabralea canjerana (Vell.) Mart.	0.0366667
Catasetum fimbriatum (C.Morren) Lindl. & Paxton	0.0366667
Dicella nucifera Chodat	0.0366667
Hemionitis tomentosa (Lam.) Raddi	0.0366667
Jacaranda micrantha Cham.	0.0366667
Nothofagus obliqua (Mirb.) Oerst.	0.0366667
Ovidia andina (Poepp. & Endl.) Meisn.	0.0366667
Tristerix corymbosus (L.) Kuijt	0.0366667
Urtica magellanica Poir.	0.0366667
Phoradendron quadrangulare (Kunth) Griseb.	0.0364426
Euphorbia portulacoides L.	0.0362045
Maytenus vitis-idaea Griseb.	0.0357143
Lepidium bonariense L.	0.0354809
Ruprechtia apetala Wedd.	0.035014
Acaulimalva nubigena (Walp.) Krapov.	0.0347222
Achyrocline alata (Kunth) DC.	0.0347222
Ageratum conyzoides L.	0.0347222
Escallonia megapotamica Spreng.	0.0347222
Fabiana peckii Niederl.	0.0347222
Myroxylon peruiferum L.f.	0.0347222
Ocotea porphyria (Griseb.) van der Werff	0.0347222
Peperomia tominana C.DC.	0.0347222
Rhipsalis floccosa Pfeiff.	0.0347222
Acanthospermum australe (Loefl.) Kuntze	0.0346359
Coleataenia prionitis (Nees) Soreng	0.0346359
Gonolobus rostratus (Vahl) Roem. & Schult.	0.0344398
Ocimum carnosum (Spreng.) Link & Otto ex Benth	0.0343697
Neltuma affinis (Spreng.) C.E.Hughes & G.P.Lewis	0.0342717
Solanum elaeagnifolium Cav.	0.0341853
Cliococca selaginoides (Lam.) C.M.Rogers & Mildner	0.0340803
Discaria americana Gillies & Hook.	0.0340803
Lepidium auriculatum Regel & Körn.	0.0340803
Rumex cuneifolius Campd.	0.0340803
Thalia geniculata L.	0.0340803
Cenchrus myosuroides Kunth	0.0336415
Aristida mendocina Phil.	0.0334267
Artemisia mendozana DC.	0.0333333
Atriplex montevidensis Spreng.	0.0333333
Calycera herbacea Cav.	0.0333333
Dysphania oblanceolata (Speg.) Mosyakin & Clemants✤	0.0333333
Glandularia tenera (Spreng.) Cabrera	0.0333333
Pyrrhocactus strausianus (K.Schum.) A.Berger✤	0.0333333
Senecio eriophyton J.Remy	0.0333333
Senecio vira-vira Hieron.	0.0333333
Tropaeolum porifolium (Cav.) L.Andersson & S.Andersson	0.0333333
Acaena sericea J.Jacq.	0.0333333
Gunnera magellanica Lam.	0.0333333
Mulguraea tridens (Lag.) N.O'Leary & P.Peralta	0.0333333
Senecio neaei DC.	0.0333333
Senecio trifurcatus (G.Forst.) Less.	0.0333333
Lantana montevidensis (Spreng.) Briq.	0.0329692
Manihot grahamii Hook.	0.0329692
Senegalia bonariensis (Gillies ex Hook. & Arn.) Seigler & Ebinger	0.0329692
Neltuma elata (Burkart) C.E.Hughes & G.P.Lewis	0.0329132
Albizia inundata (Mart.) Barneby & J.W.Grimes	0.0322409
Cnidoscolus albomaculatus (Pax) I.M.Johnst.	0.0322409
Hyptis lappacea Benth.	0.0322409
Paspalum notatum Flüggé	0.0322409
Pisonia zapallo Griseb.	0.0322409
Prosopanche americana (R.Br.) Baill.	0.0322129
Lepechinia floribunda (Benth.) Epling	0.0320086
Actinostemon concolor (Spreng.) Müll.Arg.	0.0316667
Annona neosalicifolia H.Rainer	0.0316667
Calliandra foliolosa Benth.	0.0316667
Cupania vernalis Cambess.	0.0316667
Cyrtopodium palmifrons Rchb.f. & Warm.	0.0316667
Luehea divaricata Mart.	0.0316667
Melothria cucumis Vell.	0.0316667
Piper mikanianum (Kunth) Steud.	0.0316667
Pseudananas sagenarius (Arruda) Camargo	0.0316667
Sebastiania commersoniana (Baill.) L.B.Sm. & Downs	0.0316667
Strychnos brasiliensis (Spreng.) Mart.	0.0316667
Styrax leprosus Hook. & Arn.	0.0316667
Trichilia claussenii C.DC.	0.0316667
Zanthoxylum fagara (L.) Sarg.	0.0316667
Baccharis notosergila Griseb.	0.0308403
Flaveria bidentis (L.) Kuntze	0.0308123
Monteverdia spinosa (Griseb.) Biral	0.0308123
Pectis odorata Griseb.	0.0308123
Senegalia gilliesii (Steud.) Seigler & Ebinger	0.0308123
Adiantum poiretii Wikstr.	0.0306081
Junellia seriphioides (Gillies & Hook. ex Hook.) Moldenke	0.0305556
Plantago patagonica Jacq.	0.0305556
Capsicum baccatum L.	0.0296359
Gomphrena celosioides Mart.	0.0296359
Urtica circularis (Hicken) Sorarú	0.0296359
Synandrospadix vermitoxicum (Griseb.) Engl.	0.0294118
Salicornia sp.	0.0292834
Thymophylla pentachaeta (DC.) Small	0.0292834
Struthanthus uraguensis (Hook. & Arn.) G.Don	0.0287115
Monnina dictyocarpa Griseb.	0.0285247
Begonia cucullata Willd.	0.0283333
Pouteria gardneriana (A.DC.) Radlk.	0.0283333
Condalia buxifolia Reissek	0.0280112
Senna occidentalis (L.) Link	0.0280112
Solanum hieronymi Kuntze	0.0280112
Hypericum brasiliense Choisy	0.0279692
Mimosa farinosa Griseb.	0.0278828
Trichocereus terscheckii (J.Parm. ex Pfeiff.) Britton & Rose	0.0278828
Acca sellowiana (O.Berg) Burret	0.0277778
Amelichloa brachychaeta (Godr.) Arriaga & Barkworth	0.0277778
Baccharis artemisioides Hook. & Arn.	0.0277778
Baccharis genistifolia DC.	0.0277778
Commelina diffusa Burm.f.	0.0277778
Daucus pusillus Michx.	0.0277778
Dysphania retusa (Juss. ex Moq.) Mosyakin & Clemants	0.0277778
Facelis retusa (Lam.) Sch.Bip.	0.0277778
Gamochaeta simplicicaulis (Willd. ex Spreng.) Cabrera	0.0277778
Hypochaeris pampasica Cabrera	0.0277778
Jaborosa integrifolia Lam.	0.0277778
Juncus dichotomus Elliot	0.0277778
Melica macra Nees	0.0277778
Oenothera indecora Cambess.	0.0277778
Oenothera parodiana Munz	0.0277778
Oxypetalum solanoides Hook. & Arn.	0.0277778
Paspalum quadrifarium Lam.	0.0277778
Polygonum brasiliense K.Koch	0.0277778
Pontederia azurea Sw.	0.0277778
Portulaca papulosa Schltdl.	0.0277778
Rhynchosia senna Gillies ex Hook.	0.0277778
Rumex obovatus Danser	0.0277778
Spergula ramosa (Cambess.) D.Dietr.	0.0277778
Typha latifolia L.	0.0277778
Verbena gracilescens (Cham.) Herter	0.0277778
Verbena rigida Spreng.	0.0277778
Microgramma vacciniifolia (Langsd. & Fisch.) Copel.	0.027437
Pterocaulon alopecuroides (Lam.) DC.	0.027437
Aspidosperma triternatum Rojas Acosta	0.0273389
Ludwigia peploides (Kunth) P.H.Raven	0.0273389
Adenocalymma marginatum (Cham.) DC.	0.0266667
Amsinckia calycina (Moris) Chater	0.0266667
Archidasyphyllum diacanthoides (Less.) P.L.Ferreira, Saavedra & Groppo	0.0266667
Axonopus compressus (Sw.) P.Beauv.	0.0266667
Azara lanceolata Hook.f.	0.0266667
Azara microphylla Hook.f.	0.0266667
Blumenbachia sylvestris Poepp.	0.0266667
Boquila trifoliolata (DC.) Decne.	0.0266667
Brasiliopuntia brasiliensis (Willd.) A.Berger	0.0266667
Brasiliorchis picta (Hook.) R.B.Singer, S.Koehler & Carnevali	0.0266667
Campomanesia guaviroba (DC.) Kiaersk.	0.0266667
Chiliotrichum diffusum (G.Forst.) Kuntze	0.0266667
Chloroleucon tenuiflorum (Benth.) Barneby & J.W.Grimes	0.0266667
Colletia hystrix Clos	0.0266667
Combretum fruticosum (Loefl.) Stuntz	0.0266667
Coriaria ruscifolia L.	0.0266667
Cyclopogon elatus (Sw.) Schltr.	0.0266667
Dalbergia frutescens (Vell.) Britton	0.0266667
Desfontainia spinosa Ruiz & Pav.	0.0266667
Dichorisandra hexandra (Aubl.) Standl.	0.0266667
Erythroxylum deciduum A.St.-Hil.	0.0266667
Escallonia virgata (Ruiz & Pav.) Pers.	0.0266667
Euterpe edulis Mart.	0.0266667
Galianthe brasiliensis (Spreng.) E.L.Cabral & Bacigalupo	0.0266667
Gaultheria poeppigii DC.	0.0266667
Gevuina avellana Molina	0.0266667
Gomesa longipes (Lindl. & Paxton) M.W.Chase & N.H.Williams	0.0266667
Gomesa riograndensis (Cogn.) M.W.Chase & N.H.Williams	0.0266667
Hennecartia omphalandra J.Poiss.	0.0266667
Hydrocotyle exigua (Urb.) Malme	0.0266667
Inga affinis DC.	0.0266667
Libertia chilensis (Molina) Gunckel	0.0266667
Macropharynx peltata (Vell.) J.F.Morales, M.E.Endress & Liede	0.0266667
Maytenus chubutensis (Speg.) Lourteig, O'Donell & Sleumer	0.0266667
Miltonia flavescens Lindl.	0.0266667
Mitraria coccinea Cav.	0.0266667
Mutisia decurrens Cav.	0.0266667
Myrcia palustris DC.	0.0266667
Myrciaria delicatula (DC.) O.Berg	0.0266667
Ocotea diospyrifolia (Meisn.) Mez	0.0266667
Oenothera odorata Jacq.	0.0266667
Opuntia aff. stenarthra K.Schum.	0.0266667
Osmorhiza depauperata Phil.	0.0266667
Oxalis debilis Kunth	0.0266667
Parablechnum cordatum (Desv.) Gasper & Salino	0.0266667
Passiflora alata Curtis	0.0266667
Pavonia subrotunda A.St.-Hil. & Naudin	0.0266667
Prunus subcoriacea (Chodat & Hassl.) Koehne	0.0266667
Psidium australe Cambess.	0.0266667
Psychotria leiocarpa Cham. & Schltdl.	0.0266667
Pyrostegia venusta (Ker Gawl.) Miers	0.0266667
Raukaua laetevirens (Gay) Frodin	0.0266667
Ribes valdivianum Phil.	0.0266667
Sebastiania brasiliensis Spreng.	0.0266667
Sisyrinchium patagonicum Phil. ex Baker	0.0266667
Solanum nitidibaccatum Bitter	0.0266667
Solanum valdiviense Dunal	0.0266667
Thinouia mucronata Radlk.	0.0266667
Trema micrantha (L.) Blume	0.0266667
Trichilia elegans A.Juss.	0.0266667
Valeriana lapathifolia Vahl	0.0266667
Xylopia brasiliensis Spreng.	0.0266667
Monvillea spegazzinii (F.A.C.Weber) Britton & Rose	0.0266106
Neltuma sericantha (Gillies ex Hook.) C.E.Hughes & G.P.Lewis	0.0266106
Trichocline reptans (Wedd.) Hieron.	0.0264823
Cyperus entrerianus Boeck.	0.0259384
Passiflora foetida L.	0.0259384
Amaranthus standleyanus Parodi ex Covas	0.0252101
Cynanchum montevidense Spreng.	0.0252101
Deinacanthon urbanianum (Mez) Mez	0.0252101
Flourensia thurifera (Molina) DC.	0.0252101
Apium prostratum Vent.	0.025
Cheilanthes glauca (Cav.) Mett.	0.025
Tetraglochin alata (Gillies ex Hook. & Arn.) Kuntze	0.025
Adiantum pseudotinctum Hieron.	0.0246359
Araujia angustifolia (Hook. & Arn.) Steud.	0.0246359
Araujia variegata (Griseb.) Fontella & Goyder	0.0246359
Cenchrus echinatus L.	0.0246359
Cereus argentinensis Britton & Rose✤	0.0246359
Cynophalla flexuosa (L.) J.Presl	0.0246359
Cyperus giganteus Vahl	0.0246359
Eryngium eburneum Decne.	0.0246359
Eryngium horridum Malme	0.0246359
Harrisia martinii (Labour.) Britton	0.0246359
Heteropterys glabra Hook. & Arn.	0.0246359
Indigofera suffruticosa Mill.	0.0246359
Macroscepis grandiflora (Mart.) H.A.Keller & Liede	0.0246359
Phyllostylon rhamnoides (J.Poiss.) Taub.	0.0246359
Porophyllum ruderale (Jacq.) Cass.	0.0246359
Saccharum trinii (Hack.) Renvoize	0.0246359
Zephyranthes candida (Herb. ex Lindl.) Herb.	0.0245378
Sphaeralcea cordobensis Krapov.	0.0245098
Achyrocline hyperchlora Blake	0.0243056
Adesmia inflexa Griseb.	0.0243056
Adiantum lorentzii Hieron.	0.0243056
Agalinis fiebrigii (Diels) D'Arcy	0.0243056
Alternanthera philoxeroides (Mart.) Griseb.	0.0243056
Amburana cearensis (Allemão) A.C.Sm.	0.0243056
Asclepias pilgeriana Schltr.	0.0243056
Baccharis microdonta DC.	0.0243056
Berberis lilloana Job	0.0243056
Campovassouria cruciata (Vell.) R.M.King & H.Rob.	0.0243056
Campyloneurum aglaolepis (Alston) de la Sota	0.0243056
Capsicum eximium Hunz.	0.0243056
Chamissoa altissima (Jacq.) Kunth	0.0243056
Clematis haenkeana C.Presl	0.0243056
Clinopodium bolivianum (Benth.) Kuntze	0.0243056
Colignonia glomerata Griseb.	0.0243056
Cyperus friburgensis Boeck.	0.0243056
Cyperus spectabilis Link	0.0243056
Dendrophorbium peregrinum (Griseb.) C.Jeffrey	0.0243056
Dimerostemma apense (Chodat) M.D.Moraes	0.0243056
Dodonaea viscosa Jacq.	0.0243056
Gochnatia palosanto Cabrera	0.0243056
Gorgonidium vermicidum (Speg.) Bogner & Nicolson	0.0243056
Gunnera schindleri L.E.Mora	0.0243056
Handroanthus lapacho (K.Schum.) S.Grose	0.0243056
Heliotropium lilloi (I.M.Johnst.) Luebert	0.0243056
Maytenus verticillata (Ruiz & Pav.) DC.	0.0243056
Mimosa debilis Humb. & Bonpl. ex Willd.	0.0243056
Mimosa polycarpa Kunth	0.0243056
Muehlenbeckia tamnifolia (Kunth) Meisn.	0.0243056
Myrcianthes mato (Griseb.) McVaugh	0.0243056
Myriopus paniculatus (Cham.) Feuillet	0.0243056
Nicandra physalodes (L.) Gaertn.	0.0243056
Oreopanax kuntzei Harms	0.0243056
Pachyrhizus ahipa (Wedd.) Parodi	0.0243056
Parastrephia lepidophylla (Wedd.) Cabrera	0.0243056
Paronychia chilensis DC.	0.0243056
Passiflora tenuifila Killip	0.0243056
Peperomia alata Ruiz & Pav.	0.0243056
Peperomia arifolia Miq.	0.0243056
Peperomia theodori Trel.	0.0243056
Phoradendron tucumanensis Urb.	0.0243056
Plantago orbignyana Steinh. ex Decne.	0.0243056
Polystichum pycnolepis (Kunze ex Klotzsch) Hieron.	0.0243056
Rhipsalis lorentziana Griseb.	0.0243056
Schinus meyeri F.A.Barkley	0.0243056
Scoparia dulcis L.	0.0243056
Scoparia plebeja Cham. & Schltdl.	0.0243056
Senecio clivicola Wedd.	0.0243056
Senecio cremeiflorus Mattf.	0.0243056
Senecio crepidifolius DC.	0.0243056
Senecio hieronymi Griseb.	0.0243056
Senna crassiramea (Benth.) H.S.Irwin & Barneby	0.0243056
Senna spectabilis (DC.) H.S.Irwin & Barneby	0.0243056
Sida poeppigiana (K.Schum.) Fryxell	0.0243056
Sigesbeckia serrata DC.	0.0243056
Solanum trichoneuron Lillo	0.0243056
Solanum tucumanense Griseb.	0.0243056
Tagetes campanulata Griseb.	0.0243056
Trichocereus arboricola Kimnach	0.0243056
Urera caracasana (Jacq.) Gaudich. ex Griseb.	0.0243056
Vachellia macracantha (Humb. & Bonpl. ex Willd.) Seigler & Ebinger	0.0243056
Xylosma longipetiolata Legname	0.0243056
Allenrolfea vaginata (Griseb.) Kuntze	0.0238095
Mimosa detinens Benth.	0.0238095
Trichocline cineraria (D.Don) Hook. & Arn.	0.0236111
Cereus uruguayanus R.Kiesling	0.0233333
Guarea macrophylla Vahl	0.0233333
Inga uraguensis Hook. & Arn.	0.0233333
Jacaratia spinosa (Aubl.) A.DC.	0.0233333
Solanum viarum Dunal	0.0233333
Acanthospermum hispidum DC.	0.0231092
Leptochloa crinita (Lag.) P.M.Peterson & N.W.Snow	0.0229809
Dichondra microcalyx (Hallier f.) Fabris	0.022437
Senna pendula (Willd.) H.S.Irwin & Barneby	0.022437
Tripodanthus flagellaris (Cham. & Schltdl.) Tiegh.	0.022437
Bougainvillea praecox Griseb.	0.022409
Glandularia flava (Gillies & Hook. ex Hook.) Schnack & Covas	0.0222222
Nassella tenuis (Phil.) Barkworth	0.0222222
Poa lanuginosa Poir.	0.0222222
Setaria mendocina Phil.	0.0222222
Harrisia pomanensis (F.A.C.Weber ex K.Schum.) Britton & Rose	0.0217087
Sesbania virgata (Cav.) Pers.	0.0217087
Blechnum auriculatum Cav.	0.0216667
Machaerium paraguariense Hassl.	0.0216667
Machaerium stipitatum (DC.) Vogel	0.0216667
Macropsychanthus violaceus (Mart. ex Benth.) L.P.Queiroz & Snak	0.0216667
Ocimum nudicaule Benth.	0.0216667
Pleopeltis pleopeltifolia (Raddi) Alston	0.0216667
Bothriochloa springfieldii (Gould) Parodi	0.0215803
Cereus aethiops Haw.	0.0215803
Setaria lachnea (Nees) Kunth	0.0215803
Tillandsia tricholepis Baker	0.0215803
Galianthe centranthoides (Cham. & Schltdl.) E.L.Cabral	0.0210364
Lantana balansae Briq.	0.0210364
Senna morongii (Britton) H.S.Irwin & Barneby	0.0210084
Lycium americanum Jacq.	0.0203081
Mimozyganthus carinatus (Griseb.) Burkart	0.0203081
Myrcianthes cisplatensis (Cambess.) O.Berg	0.0203081
Nama undulatum Kunth	0.0203081
Nierembergia linariaefolia Graham	0.0203081
Phyla nodiflora (L.) Greene	0.0203081
Schinopsis balansae Engl.	0.0203081
Tillandsia streptocarpa Baker	0.0203081
Cayaponia podantha Cogn.	0.0196359
Cyperus sesquiflorus (Torr.) Mattf. & Kük. ex Kük.	0.0196359
Diplokeleba floribunda N.E.Br.	0.0196359
Doryopteris concolor (Langsd. & Fisch.) Kuhn	0.0196359
Elephantopus mollis Kunth	0.0196359
Geoffroea spinosa Jacq.	0.0196359
Gymnopogon spicatus (Spreng.) Kuntze	0.0196359
Justicia comata (L.) Lam.	0.0196359
Myriopus salzmannii (DC.) Diane & Hilger	0.0196359
Passiflora misera Kunth	0.0196359
Pfaffia tuberosa (Spreng.) Hicken	0.0196359
Portulaca grandiflora Hook.	0.0196359
Pteridium esculentum (G.Forst.) Cockayne	0.0196359
Pterocaulon lorentzii Malme	0.0196359
Sporobolus indicus (L.) R.Br.	0.0196359
Tragia volubilis L.	0.0196359
Vernonanthura chamaedrys (Less.) H.Rob.	0.0196359
Acaena confertissima Bitter	0.0194444
Acaena integerrima Gillies ex Hook. & Arn.	0.0194444
Acaena platyacantha Speg.	0.0194444
Adiantum chilense Kaulf.	0.0194444
Arjona patagonica Hombr. & Jacq. ex Decne.	0.0194444
Austrocactus patagonicus (F.A.C.Weber) Hosseus	0.0194444
Baccharis patagonica Hook. & Arn.	0.0194444
Berberis ilicifolia L.f.	0.0194444
Calceolaria filicaulis Clos	0.0194444
Calceolaria uniflora Lam.	0.0194444
Callitriche lechleri (Hegelm.) Fassett	0.0194444
Colobanthus cf. lycopodioides Griseb.	0.0194444
Galium eriocarpum Bartl. ex DC.	0.0194444
Gamocarpha australis (Decne.) S.S.Denham & Pozner	0.0194444
Gamocarpha selliana Reiche	0.0194444
Gaultheria pumila (L.f.) D.J.Middleton	0.0194444
Haplopappus glutinosus Cass.	0.0194444
Hordeum pubiflorum Hook.f.	0.0194444
Hypochaeris incana (Hook. & Arn.) Macloskie	0.0194444
Juncus aff. balticus Willd.	0.0194444
Juncus balticus Willd.	0.0194444
Larrea ameghinoi Speg.	0.0194444
Lecanophora ameghinoi (Speg.) Speg.	0.0194444
Lepidophyllum cupressiforme (Lam.) Cass.	0.0194444
Luzula brachyphylla Phil.	0.0194444
Marsippospermum grandiflorum (L.f.) Hook.f.	0.0194444
Mutisia oligodon Poepp. & Endl.	0.0194444
Mutisia retrorsa Cav.	0.0194444
Nassauvia glomerulosa (Lag. ex Lindl.) D.Don	0.0194444
Olsynium junceum (E.Mey. ex C.Presl) Goldblatt	0.0194444
Oxalis nahuelhuapiensis Speg.	0.0194444
Oxalis triangularis A.St.-Hil.	0.0194444
Pappostipa ibarii (Phil.) Romasch.	0.0194444
Prosopidastrum globosum (Gillies ex Hook. & Arn.) Burkart	0.0194444
Pseudognaphalium cymatoides (Kunze ex DC.) Anderb.	0.0194444
Pseudognaphalium viravira (Molina) Anderb.	0.0194444
Schinus roigii Ruiz Leal & Cabrera	0.0194444
Sisyrinchium arenarium Poepp.	0.0194444
Taraxacum gilliesii Hook. & Arn.	0.0194444
Tristagma ameghinoi (Speg.) Speg.	0.0194444
Tropaeolum incisum (Speg.) Sparre	0.0194444
Tropaeolum patagonicum Speg.✤	0.0194444
Valeriana clarionifolia Phil.	0.0194444
Abutilon grandifolium (Wild.) Sweet	0.0189076
Acmella oppositifolia (Lam.) R.K.Jansen	0.0189076
Anemone decapetala Ard.	0.0189076
Argyrochosma nivea (Poir.) Windham	0.0189076
Baccharis flabellata Hook. & Arn.	0.0189076
Bulnesia foliosa Griseb.	0.0189076
Condalia montana A.Cast.	0.0189076
Manihot guaranitica Chodat & Hassl.	0.0189076
Mascagnia brevifolia Griseb.	0.0189076
Opuntia salmiana J.Parm. ex Pfeiff.	0.0189076
Polygonum hispidum Kunth	0.0189076
Solanum palinacanthum Dunal	0.0189076
Tillandsia meridionalis Baker	0.0189076
Trithrinax campestris (Burmeist.) Drude & Griseb.	0.0189076
Abildgaardia ovata (Burm.f.) Kral	0.0183333
Allagoptera campestris (Mart.) Kuntze	0.0183333
Alternanthera brasiliana (L.) Kuntze	0.0183333
Anemia phyllitidis (L.) Sw.	0.0183333
Aralia warmingiana (Marchal) J.Wen	0.0183333
Araujia plumosa Schltdl.	0.0183333
Araujia stormiana Morong	0.0183333
Brunfelsia australis Benth.	0.0183333
Bulbostylis juncoides (Vahl) Kük. & Herter	0.0183333
Campomanesia aurea O.Berg	0.0183333
Cantinoa althaeifolia (Pohl ex Benth.) Harley & J.F.B.Pastore	0.0183333
Casearia sylvestris Sw.	0.0183333
Cayaponia bonariensis (Mill.) Mart.Crov.	0.0183333
Celtis spinosa Spreng.	0.0183333
Chrysophyllum marginatum (Hook. & Arn.) Radlk.	0.0183333
Cissus verticillata (L.) Nicolson & C.E.Jarvis	0.0183333
Citronella gongonha (Mart.) R.A.Howard	0.0183333
Crateva tapia L.	0.0183333
Cuphea racemosa (L.f.) Spreng.	0.0183333
Cyclanthera hystrix (Gillies) Arn.	0.0183333
Eryngium coronatum Hook. & Arn.	0.0183333
Eugenia lilloana D.Legrand✤	0.0183333
Evolvulus sericeus Sw.	0.0183333
Fridericia chica (Bonpl.) L.G.Lohmann	0.0183333
Fridericia mutabilis (Bureau & K.Schum.) Frazão & L.G.Lohmann	0.0183333
Guadua paraguayana Döll	0.0183333
Gynerium sagittatum (Aubl.) P.Beauv.	0.0183333
Herreria bonplandii Lecomte	0.0183333
Herreria montevidensis Klotzsch ex Griseb.	0.0183333
Hippeastrum glaucescens (Mart.) Herb.	0.0183333
Hydrocotyle leucocephala Cham. & Schltdl.	0.0183333
Hypochaeris microcephala (Sch.Bip.) Cabrera	0.0183333
Ilex dumosa Reissek	0.0183333
Inga marginata Willd.	0.0183333
Lippia lippioides (Cham.) Rusby	0.0183333
Matayba elaeagnoides Radlk.	0.0183333
Melothria warmingii Cogn.	0.0183333
Modiolastrum malvifolium (Griseb.) K.Schum.	0.0183333
Myracrodruon balansae (Engl.) Santin	0.0183333
Myrceugenia euosma (O.Berg) D.Legrand	0.0183333
Myrcia anomala Cambess.	0.0183333
Myrcia oblongata DC.	0.0183333
Myrsine balansae (Mez) Otegui	0.0183333
Panicum tricholaenoides Steud.	0.0183333
Pharus lappulaceus Aubl.	0.0183333
Phytolacca bogotensis Kunth	0.0183333
Piptocarpha sellowii (Sch.Bip.) Baker	0.0183333
Psidium grandifolium DC.	0.0183333
Psidium missionum D.Legrand	0.0183333
Rauvolfia sellowii Müll.Arg.	0.0183333
Rubus schottii Pohl ex Focke	0.0183333
Selenicereus setaceus (Salm-Dyck ex DC.) Werderm.	0.0183333
Serjania meridionalis Cambess.	0.0183333
Solanum americanum Mill.	0.0183333
Solanum granulosum-leprosum Dunal	0.0183333
Solanum mauritianum Scop.	0.0183333
Stapfochloa elata (Desv.) P.M.Peterson	0.0183333
Verbena montevidensis Spreng.	0.0183333
Vernonanthura tweedieana (Baker) H.Rob.	0.0183333
Ruellia hygrophila Mart.	0.0182073
Solanum aridum Morong	0.0182073
Grindelia pulchella Dunal	0.017507
Tessaria ambigua DC.	0.017507
Cyrtopodium pflanzii Schltr.	0.0168067
Schinus bumelioides I.M.Johnst.	0.0161064
Cenchrus pilcomayensis (Mez) Morrone	0.0154062
Lycium ciliatum Schltdl.	0.0154062
Porophyllum obscurum (Spreng.) DC.	0.0154062
Quiabentia verticillata (Vaupel) Borg	0.0154062
Vachellia albicorticata (Burkart) Seigler & Ebinger	0.0154062
Acaena caespitosa Gillies ex Hook. & Arn.	0.0152778
Baccharis gilliesii A.Gray	0.0152778
Baccharis tenella Hook. & Arn.	0.0152778
Bougainvillea spinosa (Cav.) Heimerl	0.0152778
Dolichlasium lagascae D.Don	0.0152778
Eragrostis mexicana (Hornem.) Link	0.0152778
Euphorbia schickendantzii Hieron.	0.0152778
Fabiana patagonica Speg.	0.0152778
Heterostachys ritteriana (Moq.) Ung.-Sternb.	0.0152778
Hoffmannseggia erecta Phil.	0.0152778
Hysterionica glaucifolia (Kuntze) Solbrig	0.0152778
Jarava neaei (Nees ex Steud.) Peñailillo	0.0152778
Neltuma caldenia (Burkart) C.E.Hughes & G.P.Lewis✤	0.0152778
Nicotiana noctiflora Hook.✤	0.0152778
Oreopolus glacialis (Poepp.) Ricardi	0.0152778
Pantacantha ameghinoi Speg.	0.0152778
Pappophorum caespitosum R.E.Fr.	0.0152778
Pappophorum phillippianum Parodi	0.0152778
Pappostipa speciosa (Trin. & Rupr.) Romasch.	0.0152778
Pappostipa vaginata (Phil.) Romasch.	0.0152778
Philibertia gilliesii Hook. & Arn.	0.0152778
Prosopidastrum striatum (Benth.) R.A.Palacios & Hoc✤	0.0152778
Senecio gilliesii Hook. & Arn.	0.0152778
Sisyrinchium macrocarpum Hieron.	0.0152778
Sphaeralcea mendocina Phil.	0.0152778
Sporobolus rigens (Trin.) E.Desv.	0.0152778
Trichocline dealbata (Hook. & Arn.) Benth. & Hook.f. ex Griseb.	0.0152778
Tweedia brunonis Hook. & Arn.	0.0152778
Ugni molinae Turcz.	0.0152778
Viola atropurpurea Leyb.	0.0152778
Zephyranthes jamesonii (Baker) Nic.García & S.C.Arroyo	0.0152778
Zuccagnia punctata Cav.✤	0.0152778
Asclepias mellodora A.St.-Hil.	0.0140056
Cayaponia citrullifolia (Griseb.) Cogn. ex Griseb.	0.0140056
Chromolaena christieana (Baker) R.M.King & H.Rob.	0.0140056
Cissus palmata Poir.	0.0140056
Glandularia tweedieana (Niven ex Hook.) P.Peralta	0.0140056
Lippia junelliana (Moldenke) Tronc.	0.0140056
Urvillea chacoensis Hunz.	0.0140056
Acanthosyris spinescens (Mart. & Eichler) Griseb.	0.0133333
Acianthera aphthosa (Lindl.) Pridgeon & M.W.Chase	0.0133333
Acianthera hygrophila (Barb.Rodr.) Pridgeon & M.W.Chase	0.0133333
Acianthera pubescens (Lindl.) Pridgeon & M.W.Chase	0.0133333
Acianthera recurva (Lindl.) Pridgeon & M.W.Chase	0.0133333
Acianthera rhabdosepala (Schltr.) Chiron & C.Berg	0.0133333
Acianthera sonderana (Rchb.f.) Pridgeon & M.W.Chase	0.0133333
Adiantopsis dichotoma (Sw.) T.Moore	0.0133333
Aechmea calyculata (E.Morren) Baker	0.0133333
Aeschynomene rudis Benth.	0.0133333
Albizia niopoides (Spruce ex Benth.) Burkart	0.0133333
Aloysia virgata (Ruiz & Pav.) Pers.	0.0133333
Amauropelta recumbens (Rosenst.) Salino & T.E.Almeida	0.0133333
Anathallis linearifolia (Cogn.) Pridgeon & M.W.Chase	0.0133333
Andropogon bicornis L.	0.0133333
Andropogon lateralis Nees	0.0133333
Apuleia leiocarpa (Vogel) J.F.Macbr.	0.0133333
Argyrochosma flava (Hook.) M.Kessler & A.R.Sm.	0.0133333
Aristida oligospira (Hack.) Henrard	0.0133333
Aristida pallens Cav.	0.0133333
Aristolochia gibertii Hook.	0.0133333
Aristolochia trilobata L.	0.0133333
Aspidogyne kuczynskii (Porsch) Garay	0.0133333
Aspidosperma australe Müll.Arg.	0.0133333
Aspilia pascalioides Griseb.	0.0133333
Baccharis cf. vulneraria Baker	0.0133333
Baccharis oxyodonta DC.	0.0133333
Baccharis punctulata DC.	0.0133333
Banara tomentosa Clos	0.0133333
Barbosella cogniauxiana (Speg. & Kraenzl.) Schltr.	0.0133333
Bastardiopsis densiflora (Hook. & Arn.) Hassl.	0.0133333
Billbergia nutans H.Wendl. ex Regel	0.0133333
Billbergia zebrina (Herb.) Lindl.	0.0133333
Bixa orellana L.	0.0133333
Borreria poaya (A.St.-Hil.) DC.	0.0133333
Brunfelsia pilosa Plowman	0.0133333
Buchnera longifolia Kunth	0.0133333
Bulbophyllum napelli Lindl.	0.0133333
Butia yatay (Mart.) Becc.	0.0133333
Calea pinnatifida (R.Br.) Less.	0.0133333
Campylocentrum grisebachii Cogn.	0.0133333
Campylocentrum neglectum (Rchb.f. & Warm.) Cogn.	0.0133333
Campyloneurum nitidum (Kaulf.) C.Presl	0.0133333
Canavalia brasiliensis Mart. ex Benth.	0.0133333
Canna paniculata Ruiz & Pav.	0.0133333
Capanemia micromera Barb.Rodr.	0.0133333
Capanemia superflua (Rchb.f.) Garay	0.0133333
Capsicum flexuosum Sendtn.	0.0133333
Casearia decandra Jacq.	0.0133333
Cattleya cernua (Lindl.) C.Berg	0.0133333
Centratherum punctatum Cass.	0.0133333
Cestrum laevigatum Schltdl.	0.0133333
Chamaecrista desvauxii (Collad.) Killip	0.0133333
Chamaecrista repens (Vogel) H.S.Irwin & Barneby	0.0133333
Cheilanthes micropteris Sw.	0.0133333
Chevreulia sarmentosa (Pers.) S.F.Blake	0.0133333
Chomelia obtusa Cham. & Schltdl.	0.0133333
Chromolaena caaguazuensis (Hieron.) R.M.King & H.Rob.	0.0133333
Chromolaena ivifolia (L.) R.M.King & H.Rob.	0.0133333
Cissus striata Ruiz & Pav.	0.0133333
Cissus sulcicaulis (Baker) Planch.	0.0133333
Citronella paniculata (Mart.) R.A.Howard	0.0133333
Clematis bonariensis Juss. ex DC.	0.0133333
Collaea stenophylla (Hook. & Arn.) Benth.	0.0133333
Condea floribunda (Briq.) Harley & J.F.B.Pastore	0.0133333
Condylocarpon isthmicum (Vell.) A.DC.	0.0133333
Conyza blakei (Cabrera) Cabrera	0.0133333
Conyza sumatrensis (Retz.) E.Walker	0.0133333
Copaifera langsdorffii Desf.	0.0133333
Craniolaria integrifolia Cham.	0.0133333
Cristobalia australis (Malme) H.A.Keller & Liede	0.0133333
Croton urucurana Baill.	0.0133333
Cunila microcephala Benth.	0.0133333
Cybistax antisyphilitica (Mart.) Mart.	0.0133333
Cyclanthera tenuisepala Cogn.	0.0133333
Cyclopogon congestus (Vell.) Hoehne	0.0133333
Cyperus luzulae (L.) Rottb. ex Retz.	0.0133333
Daphnopsis racemosa Griseb.	0.0133333
Deppea blumenaviensis (K.Schum.) Lorence	0.0133333
Desmodium affine Schltdl.	0.0133333
Desmodium incanum DC.	0.0133333
Didymopanax morototoni (Aubl.) Decne. & Planch.	0.0133333
Dioscorea aff. multiflora Mart. ex Griseb.	0.0133333
Dioscorea sinuata Vell.	0.0133333
Dolichandra quadrivalvis (Jacq.) L.G.Lohmann	0.0133333
Dorstenia brasiliensis Lam.	0.0133333
Doryopteris nobilis (T.Moore) C.Chr.	0.0133333
Eleocharis bonariensis Nees	0.0133333
Epidendrum rigidum Jacq.	0.0133333
Eryngium pristis Cham. & Schltdl.	0.0133333
Escobedia grandiflora (L.f.) Kuntze	0.0133333
Eugenia burkartiana (D.Legrand) D.Legrand	0.0133333
Eugenia pitanga (O.Berg) Kiaersk.	0.0133333
Euphorbia papillosa A.St.-Hil.	0.0133333
Euphorbia sciadophila Boiss.	0.0133333
Eurystyles actinosophila (Barb.Rodr.) Schltr.	0.0133333
Forsteronia glabrescens Müll.Arg.	0.0133333
Galium hypocarpium (L.) Endl. ex Griseb.	0.0133333
Galium megapotamicum Spreng.	0.0133333
Galium nigroramosum (Ehrend.) Dempster	0.0133333
Galium richardianum (Gillies ex Hook. & Arn.) Endl. ex Walp.	0.0133333
Gamochaeta filaginea (DC.) Cabrera	0.0133333
Genipa americana L.	0.0133333
Geophila repens (L.) I.M.Johnst.	0.0133333
Goeppertia eichleri (Petersen) Borchs. & S.Suárez	0.0133333
Gomesa cornigera (Lindl.) M.W.Chase & N.H.Williams	0.0133333
Gomesa longicornu (Mutel) M.W.Chase & N.H.Williams	0.0133333
Gomesa paranaensoides M.W.Chase & N.H.Williams	0.0133333
Gomesa recurva R.Br.	0.0133333
Goniopteris riograndensis (Lindm.) Ching	0.0133333
Grandiphyllum divaricatum (Lindl.) Docha Neto	0.0133333
Grandiphyllum edwallii (Cogn.) Docha Neto	0.0133333
Guarea guidonia (L.) Sleumer	0.0133333
Handroanthus albus (Cham.) Mattos	0.0133333
Handroanthus pulcherrimus (Sandwith) S.Grose	0.0133333
Heliotropium phylicoides Cham.	0.0133333
Heliotropium transalpinum Vell.	0.0133333
Heteropterys intermedia (A.Juss.) Griseb.	0.0133333
Hydrocotyle callicephala Cham.	0.0133333
Hydrolea sp.	0.0133333
Imperata brasiliensis Trin.	0.0133333
Ipomoea indica (Burm.) Merr.	0.0133333
Ipomoea nil (L.) Roth	0.0133333
Isabelia virginalis Barb.Rodr.	0.0133333
Isochilus linearis (Jacq.) R.Br.	0.0133333
Jacaranda puberula Cham.	0.0133333
Justicia brasiliana Roth	0.0133333
Lepidaploa balansae (Hieron.) H.Rob.	0.0133333
Lessingianthus glabratus (Less.) H.Rob.	0.0133333
Lippia brasiliensis (Link) T.Silva	0.0133333
Lippia lupulina Cham.	0.0133333
Lobelia hassleri Zahlbr.	0.0133333
Lonchocarpus nitidus (Vogel) Benth.	0.0133333
Ludwigia elegans (Cambess.) H.Hara	0.0133333
Malaxis parthoni C.Morren	0.0133333
Manettia luteo-rubra (Vell.) Benth.	0.0133333
Mansoa difficilis (Cham.) Bureau & K.Schum.	0.0133333
Maxillaria spegazziniana Kraenzl.	0.0133333
Maxillaria vitelliniflora Barb.Rodr.	0.0133333
Melicoccus lepidopetalus Radlk.	0.0133333
Melochia pilosa (Mill.) Fawc. & Rendle	0.0133333
Mikania glomerata Spreng.	0.0133333
Mikania lindleyana DC.	0.0133333
Mikania micrantha Kunth	0.0133333
Myrcia cruciflora A.R.Lourenço & E.Lucas	0.0133333
Myrcia selloi (Spreng.) N.Silveira	0.0133333
Myrsine laetevirens (Mez) Arechav.	0.0133333
Osmunda spectabilis Willd.	0.0133333
Oxalis brasiliensis Lodd., G.Lodd. & W.Lodd. ex Hildebr.	0.0133333
Oxalis linarantha Lourteig	0.0133333
Oxypetalum brachystemma Malme	0.0133333
Pabstiella aveniformis (Hoehne) Luer	0.0133333
Pabstiella matinhensis (Hoehne) Luer	0.0133333
Parodia sp.	0.0133333
Paspalum quarinii Morrone & Zuloaga	0.0133333
Paullinia elegans Cambess.	0.0133333
Paullinia pinnata L.	0.0133333
Pavonia communis A.St.-Hil.	0.0133333
Peperomia circinnata Link	0.0133333
Phlegmariurus mandiocanus (Raddi) B. Øllg.	0.0133333
Phymatidium delicatulum Lindl.	0.0133333
Phytolacca thyrsiflora Fenzl ex J.A.Schmidt	0.0133333
Piper amalago L.	0.0133333
Pleopeltis minima (Bory) J.Prado & R.Y.Hirai	0.0133333
Poikilacanthus glandulosus (Nees) Ariza	0.0133333
Pombalia bigibbosa (A.St.-Hil.) Paula-Souza	0.0133333
Portulaca cryptopetala Speg.	0.0133333
Pristimera celastroides (Kunth) A.C.Sm.	0.0133333
Prunus chamissoana Koehne	0.0133333
Pterocaulon balansae Chodat	0.0133333
Randia ferox (Cham. & Schltdl.) DC.	0.0133333
Rhipsalis aculeata F.A.C.Weber	0.0133333
Roupala montana Aubl.	0.0133333
Ruellia angustiflora (Nees) Lindau ex Rambo	0.0133333
Rumex paraguayensis D.Parodi	0.0133333
Ruprechtia laxiflora Meisn.	0.0133333
Salvia guaranitica A.St.-Hil. ex Benth.	0.0133333
Schinus lentiscifolia Marchand	0.0133333
Schinus weinmannifolia Engl.	0.0133333
Scoparia hassleriana Chodat	0.0133333
Seguieria americana L.	0.0133333
Senegalia recurva (Benth.) Seigler & Ebinger	0.0133333
Sesbania punicea (Cav.) Benth.	0.0133333
Setaria sulcata Raddi	0.0133333
Sida santaremensis Monteiro	0.0133333
Sida urens L.	0.0133333
Solanum atropurpureum Schrank	0.0133333
Solanum paniculatum L.	0.0133333
Sorghastrum setosum (Griseb.) Hitchc.	0.0133333
Specklinia grobyi (Bateman ex Lindl.) F.Barros	0.0133333
Stenachaenium riedelii Baker	0.0133333
Terminalia triflora (Griseb.) Lillo	0.0133333
Tillandsia aëranthos (Loisel.) L.B.Sm.	0.0133333
Tillandsia recurvata (L.) L.	0.0133333
Tillandsia stricta Sol. ex Sims	0.0133333
Tradescantia fluminensis Vell.	0.0133333
Tragia polyandra Vell.	0.0133333
Trichocentrum pumilum (Lindl.) M.W.Chase & N.H.Williams	0.0133333
Urvillea ulmacea Kunth	0.0133333
Urvillea uniloba Radlk.	0.0133333
Victoria cruziana Orb.	0.0133333
Vitex cymosa Bertero ex Spreng.	0.0133333
Vittaria lineata (L.) Sm.	0.0133333
Vriesea platynema Gaudich.	0.0133333
Warrea warreana (Lodd. ex Lindl.) C.Schweinf.	0.0133333
Wilbrandia ebracteata Cogn.	0.0133333
Xylosma tweediana (Clos) Eichler	0.0133333
Zanthoxylum caribaeum Lam.	0.0133333
Zygopetalum maxillare Lodd.	0.0133333
Araujia stuckertiana (Kurtz ex Heger) Fontella & Goyder	0.012605
Augustea suffruticosa (Griseb.) Iamonico	0.012605
Bulbostylis capillaris (L.) C.B.Clarke	0.012605
Byttneria filipes Mart. ex K.Schum.	0.012605
Callianthe pauciflora (A.St.-Hil.) Dorr	0.012605
Cheilanthes obducta Mett. ex Kuhn	0.012605
Clematis campestris A.St.-Hil.	0.012605
Coccoloba spinescens Morong	0.012605
Crotalaria incana L.	0.012605
Desmanthus virgatus (L.) Willd.	0.012605
Dioscorea microbotrya Griseb.	0.012605
Distimake dissectus (Jacq.) Simões & Staples	0.012605
Ephedra tweediana Fisch. & C.A.Mey. emend. J.H.Hunz.	0.012605
Euploca procumbens (Mill.) Diane & Hilger	0.012605
Gomphrena perennis L.	0.012605
Gomphrena pulchella Mart.	0.012605
Hydrocotyle ranunculoides L.f.	0.012605
Ipomoea purpurea (L.) Roth	0.012605
Kageneckia lanceolata Ruiz & Pav.	0.012605
Limnobium laevigatum (Humb. & Bonpl. ex Willd.) Heine	0.012605
Lycium elongatum Miers	0.012605
Lycium nodosum Miers	0.012605
Macroptilium panduratum (C.Mart. ex Benth.) Maréchal & Baudet	0.012605
Macroscepis schreiteri (Descole & T.Mey.) H.A.Keller & Liede	0.012605
Monvillea cavendischii (Monv.) Britton & Rose	0.012605
Moquiniastrum argentinum (Cabrera) G.Sancho	0.012605
Neltuma × vinalillo (Stuck.) C.E.Hughes & G.P.Lewis	0.012605
Neltuma elata (Burkart) C.E.Hughes & G.P.Lewis × Neltuma nigra (Griseb.) C.E.Hughes & G.P.Lewis	0.012605
Nicotiana paa Mart.Crov.	0.012605
Nymphaea jamesoniana Planch.	0.012605
Pappophorum pappiferum (Lam.) Kuntze	0.012605
Paspalum almum Chase	0.012605
Psidium salutare (Humb., Bonpl. & Kunth) O.Berg	0.012605
Pterocaulon virgatum (L.) DC.	0.012605
Ruehssia castillonii (Lillo ex T.Mey.) H.A.Keller & Liede	0.012605
Salvia cardiophylla Benth.	0.012605
Scoparia nudicaulis Chodat	0.012605
Selaginella sellowii Hieron.	0.012605
Senna chloroclada (Harms) H.S.Irwin & Barneby	0.012605
Senna obtusifolia (L.) H.S.Irwin & Barneby	0.012605
Solanum chacoense Bitter	0.012605
Sporobolus cf. spartinus (Trin.) P.M.Peterson & Saarela	0.012605
Tillandsia loliacea Mart. ex Schult.f.	0.012605
Tragia hieronymii Pax & K.Hoffm.	0.012605
Glandularia platensis (Spreng.) Schnack & Covas	0.0112045
Myriopteris notholaenoides (Desv.) Grusz & Windham	0.0112045
Picrosia longifolia D.Don	0.0112045
Portulaca umbraticola Kunth	0.0112045
Pterocaulon cordobense Kuntze	0.0112045
Senecio pampeanus Cabrera	0.0112045
Senna spiniflora (Burkart) H.S.Irwin & Barneby	0.0112045
Setaria pampeana Parodi ex Nicora	0.0112045
Tillandsia funebris A.Cast.	0.0112045
Tillandsia recurvifolia Hook.	0.0112045
Trichocline sinuata (D.Don) Cabrera	0.0112045
Bauhinia argentinensis Burkart	0.00910364
Eryngium elegans Cham. & Schltdl.	0.00910364
Janusia guaranitica (A.St.-Hil.) A.Juss.	0.00910364
Pluchea microcephala R.K.Godfrey	0.00910364
Setaria parviflora (Poir.) Kerguélen	0.00910364
Acalypha communis Müll.Arg.	0.00770308
Cardiospermum corindum L.	0.00770308
Chloris castilloniana Lillo & Parodi	0.00770308
Croton hieronymi Griseb.	0.00770308
Croton parvifolius Müll.Arg.	0.00770308
Denisophytum stuckertii (Hassl.) E.Gagnon & G.P.Lewis	0.00770308
Digitaria insularis (L.) Fedde	0.00770308
Dyckia floribunda Griseb.	0.00770308
Erythrina mulungu Mart.	0.00770308
Euphorbia selloi (Klotzsch & Garcke) Boiss.	0.00770308
Gouinia paraguayensis (Kuntze) Parodi	0.00770308
Heliotropium elongatum Hoffm. ex Roem. & Schult.	0.00770308
Jacaratia corumbensis Kuntze	0.00770308
Jatropha hieronymi Kuntze	0.00770308
Lemna gibba L.	0.00770308
Leptochloa pluriflora (E.Fourn.) P.M. eterson & N.W.Snow	0.00770308
Mitracarpus megapotamicus (Spreng.) Kuntze	0.00770308
Pascalia glauca Ortega	0.00770308
Polygonum hydropiperoides Michx.	0.00770308
Rhynchosia diversifolia Micheli	0.00770308
Ruellia ciliatiflora Hook.	0.00770308
Ruellia simplex C.Wright	0.00770308
Tillandsia capillaris Ruiz & Pav.	0.00770308
Tillandsia xiphioides Ker Gawl.	0.00770308
Urtica spatulata Sm.	0.00770308
Wissadula densiflora R.E.Fr.	0.00770308
Acanthocalycium spiniflorum (K.Schum.) Backeb.	0.00630252
Adesmia muricata (Jacq.) DC.	0.00630252
Adiantum orbignyanum Mett. ex Kuhn	0.00630252
Agalinis genistifolia (Cham. & Schltdl.) D'Arcy	0.00630252
Aldama anchusifolia (DC.) E.E.Schill. & Panero	0.00630252
Aloysia decipiens Ravenna	0.00630252
Aloysia scorodonioides (Kunth) Cham.	0.00630252
Alternanthera paronychioides A.St.-Hil.	0.00630252
Amaranthus cf. spinosus L.	0.00630252
Arenaria lanuginosa (Michx.) Rohrb.	0.00630252
Aristida adscensionis L.	0.00630252
Aristolochia elegans Mast.	0.00630252
Aristolochia fimbriata Cham.	0.00630252
Aristolochia lingua Malme	0.00630252
Aristolochia stuckertii Speg.	0.00630252
Asclepias barjoniifolia E.Fourn.	0.00630252
Aspicarpa sericea Griseb.	0.00630252
Aspilia aff. pascalioides Griseb.	0.00630252
Baccharis albida Hook. & Arn.	0.00630252
Baccharis ulicina Hook. & Arn.	0.00630252
Bouteloua aristidoides (Kunth) Griseb.	0.00630252
Bouteloua megapotamica (Spreng.) Kuntze	0.00630252
Cabomba caroliniana A.Gray	0.00630252
Calycophyllum multiflorum Griseb.	0.00630252
Cardionema ramosissima (Weinm.) A.Nelson & J.F.Macbr.	0.00630252
Cenchrus longispinus (Hack.) Fernald	0.00630252
Cenchrus spinifex Cav.	0.00630252
Ceratophyllum demersum L.	0.00630252
Cestrum strigilatum Ruiz & Pav.	0.00630252
Chaptalia sinuata (Less.) Baker	0.00630252
Chloris barbata Sw.	0.00630252
Chromolaena hirsuta (Hook. & Arn.) R.M.King & H.Rob.	0.00630252
Cienfuegosia drummondii (A.Gray) Lewton	0.00630252
Cissus tweediana (Baker) Griseb.	0.00630252
Cleistocactus smaragdiflorus (F.A.C.Weber) Britton & Rose	0.00630252
Cnidoscolus urens (L.) Arthur	0.00630252
Conyza glandulitecta Cabrera	0.00630252
Corchorus hirtus L.	0.00630252
Croton glandulosus L.	0.00630252
Croton lanatus Lam.	0.00630252
Cucurbitella asperata (Gillies ex Hook. & Arn.) Walp.	0.00630252
Cyperus corymbosus Rottb.	0.00630252
Cyperus haspan L.	0.00630252
Cyperus niger Ruiz & Pav.	0.00630252
Dactylaena pauciflora Griseb.	0.00630252
Desmanthus acuminatus Benth.	0.00630252
Desmanthus paspalaceus (Lindm.) Burkart	0.00630252
Desmanthus tatuhyensis Hoehne	0.00630252
Dicliptera squarrosa Nees	0.00630252
Diplachne fusca (L.) P.Beauv. ex Roem. & Schult.	0.00630252
Doryopteris triphylla (Lam.) H.Christ	0.00630252
Dyckia longipetala Baker	0.00630252
Echinodorus paniculatus Micheli emend. Rataj	0.00630252
Echinopsis aurea Britton & Rose	0.00630252
Echinopsis leucantha (Gillies ex Salm-Dyck) Walp.✤	0.00630252
Egletes viscosa (L.) Less.	0.00630252
Eleocharis elegans (Kunth) Roem. & Schult.	0.00630252
Enydra anagallis Gardner	0.00630252
Eragrostis orthoclada Hack.	0.00630252
Eriochloa punctata (L.) Desv. ex Ham.	0.00630252
Eryngium ebracteatum Lam.	0.00630252
Eryngium sanguisorba Cham. & Schltdl.	0.00630252
Erythroxylum argentinum O.E.Schulz	0.00630252
Erythroxylum cuneifolium (Mart.) O.E.Schulz	0.00630252
Euphorbia lasiocarpa Klotzsch	0.00630252
Eustachys retusa (Lag.) Kunth	0.00630252
Flaveria haumanii Dimitri & Orfila	0.00630252
Galactia latisiliqua Desv.	0.00630252
Gamochaeta americana (Mill.) Wedd.	0.00630252
Gamochaeta pensylvanica (Willd.) Cabrera	0.00630252
Gastoniella chaerophylla (Desv.) Li Bing Zhang & Liang Zhang	0.00630252
Gentianella parviflora (Griseb.) T.N.Ho	0.00630252
Glandularia aristigera (S.Moore) Tronc.	0.00630252
Glandularia dissecta (Willd. ex Spreng.) Schnack & Covas	0.00630252
Gomphrena haenkeana Mart.	0.00630252
Gomphrena martiana Gillies ex Moq.	0.00630252
Gonopterodendron bonariensis (Griseb.) A.C.Godoy-Bürki	0.00630252
Gouinia latifolia (Griseb.) Vasey	0.00630252
Gymnocalycium mihanovichii (Fric ex Gürke) Britton & Rose	0.00630252
Gymnocalycium ochoterenae Backeb.	0.00630252
Gymnocalycium saglionis (Cels) Britton & Rose✤	0.00630252
Gyptis artemisifolia (Griseb.) R.M.King & H.Rob.	0.00630252
Handroanthus chrysotrichus (Mart. ex A.DC.) Mattos	0.00630252
Heteropterys dumetorum (Griseb.) Nied.	0.00630252
Heterosperma tenuisectum (Griseb.) Cabrera	0.00630252
Hochreutinera hasslerana (Hochr.) Krapov.	0.00630252
Hydrocleys nymphoides (Willd.) Buchenau	0.00630252
Hymenoxys anthemoides (Juss.) Cass.	0.00630252
Ibatia fiebrigii (Schltr.) Morillo	0.00630252
Ibicella parodii Abbiatti	0.00630252
Imperata contracta (Kunth) Hitchc.	0.00630252
Ipomoea bonariensis Hook.	0.00630252
Ipomoea cairica (L.) Sweet	0.00630252
Ipomoea cheirophylla O'Donell	0.00630252
Ipomoea hieronymi (Kuntze) O'Donell	0.00630252
Jarava leptostachya (Griseb.) F.Rojas	0.00630252
Jatropha grossidentata Pax & K.Hoffm.	0.00630252
Jatropha isabelliae Müll.Arg.	0.00630252
Jatropha macrocarpa Griseb.	0.00630252
Junellia hookeriana (Covas & Schnack) N.O'Leary & P.Peralta	0.00630252
Justicia squarrosa Griseb.	0.00630252
Kallstroemia tucumanensis Descole, O'Donell & Lourteig	0.00630252
Lantana achyranthifolia Desf.	0.00630252
Lantana fucata Lindl.	0.00630252
Lantana grisebachii Stuck. ex Seckt	0.00630252
Lantana megapotamica (Spreng.) Tronc.	0.00630252
Leptochloa fusca (L.) Kunth	0.00630252
Leptochloa virgata (L.) P.Beauv.	0.00630252
Leptospron adenanthum (G.Mey.) A.Delgado	0.00630252
Lessingianthus mollissimus (D.Don ex Hook. & Arn.) H.Rob.	0.00630252
Lophocarpinia aculeatifolia (Burkart) Burkart	0.00630252
Louisiella elephantipes (Nees ex Trin.) Zuloaga	0.00630252
Ludwigia bonariensis (Micheli) H.Hara	0.00630252
Ludwigia octovalvis (Jacq.) P.H.Raven	0.00630252
Lycianthes asarifolia (Kunth & Bouché) Bitter	0.00630252
Lycium cuneatum Dammer	0.00630252
Lycopodium clavatum L.	0.00630252
Macroptilium bracteatum (Nees & C.Mart.) Maréchal & Baudet	0.00630252
Mandevilla angustifolia (Malme) Woodson	0.00630252
Marsilea sp.	0.00630252
Menodora integrifolia (Cham. & Schltdl.) Steud.	0.00630252
Mikania cordifolia (L.f.) Willd.	0.00630252
Mimosa strigillosa Torr. & A.Gray	0.00630252
Nassella catamarcensis Torres	0.00630252
Nassella hyalina (Nees) Barkworth	0.00630252
Neltuma aff. nigra (Griseb.) C.E.Hughes & G.P.Lewis	0.00630252
Neptunia pubescens Benth.	0.00630252
Nymphoides indica (L.) Kuntze	0.00630252
Ocimum campechianum Mill.	0.00630252
Odontocarya asarifolia Barneby	0.00630252
Ophryosporus axilliflorus (Griseb.) Hieron.	0.00630252
Opuntia colubrina A.Cast.	0.00630252
Opuntia discolor Britton & Rose	0.00630252
Opuntia megapotamica Arechav.	0.00630252
Otholobium higuerilla (Gillies ex Hook.) J.W.Grimes	0.00630252
Panicum trichanthum Nees	0.00630252
Paspalum conjugatum P.J.Bergius	0.00630252
Paspalum malacophyllum Trin.	0.00630252
Paspalum simplex Morong	0.00630252
Paspalum unispicatum (Scribn. & Merr.) Nash	0.00630252
Passiflora palmatisecta Mast.	0.00630252
Peperomia comarapana C.DC.	0.00630252
Perezia multiflora (Humb. & Bonpl.) Less.	0.00630252
Physalis pubescens L.	0.00630252
Poa calchaquiensis Hack.	0.00630252
Pombalia serrata (Phil.) Paula-Souza✤	0.00630252
Porophyllum linifolium (Ard.) DC.	0.00630252
Proustia cuneifolia D.Don	0.00630252
Pseudabutilon virgatum (Cav.) Fryxell	0.00630252
Pseudognaphalium cheiranthifolium (Lam.) Hilliard & B.L.Burtt	0.00630252
Pterocaulon polystachyum DC.	0.00630252
Pterocaulon purpurascens Malme	0.00630252
Puya spathacea (Griseb.) Mez	0.00630252
Rhynchosia bicentrica B.L.Turner	0.00630252
Rhynchosia minima (L.) DC.	0.00630252
Rhynchospora cf. rugosa (Vahl) Gale	0.00630252
Rhynchospora corymbosa (L.) Britton	0.00630252
Ruellia filicalyx Lindau	0.00630252
Ruellia macrosolen Lillo ex C.Ezcurra	0.00630252
Salvinia minima Baker	0.00630252
Samolus valerandi L.	0.00630252
Sapindus saponaria L.	0.00630252
Sarcoglottis cf. grandiflora (Hook.) Klotzsch	0.00630252
Schinus pilifera I.M.Johnst.	0.00630252
Scutellaria racemosa Pers.	0.00630252
Senecio deferens Griseb.	0.00630252
Senecio grisebachii Baker	0.00630252
Senna hirsuta (L.) H.S.Irwin & Barneby	0.00630252
Setaria cordobensis R.A.W.Herrm.	0.00630252
Setaria fiebrigii R.A.W.Herrm.	0.00630252
Setaria macrostachya Kunth	0.00630252
Sida glabra Mill.	0.00630252
Sida spinosa L.	0.00630252
Sisyrinchium chilense Hook.	0.00630252
Solanum bonariense L.	0.00630252
Solanum commersonii Dunal ex Poir.	0.00630252
Solidago microglossa DC.	0.00630252
Sorghastrum pellitum (Hack.) Parodi	0.00630252
Sporobolus monandrus Roseng., B.R.Arrill. & Izag.	0.00630252
Staelia virgata (Link ex Roem. & Schult.) K.Schum.	0.00630252
Stapfochloa parvispicula (Caro & E.A.Sánchez) P.M.Peterson	0.00630252
Steinchisma hians (Elliott) Nash	0.00630252
Stemodia ericifolia (Kuntze) K.Schum.	0.00630252
Stemodia lanceolata Benth.	0.00630252
Tagetes argentina Cabrera	0.00630252
Tarenaya tucumanensis (H.H.Iltis) Arana & Oggero	0.00630252
Teucrium cubense Jacq.	0.00630252
Thalictrum decipiens Boivin	0.00630252
Tillandsia aizoides Mez	0.00630252
Tillandsia argentina C.H.Wright	0.00630252
Tillandsia ixioides Griseb.	0.00630252
Tillandsia lorentziana Griseb.	0.00630252
Tillandsia minutiflora Donadío	0.00630252
Tragia geraniifolia Klotzsch ex Baill.	0.00630252
Trichocereus thelegonoides (Speg.) Britton & Rose	0.00630252
Trichocline plicata D.Don ex Hook. & Arn.	0.00630252
Tripogonella spicata (Nees) P.M.Peterson & Romasch.	0.00630252
Urolepis hecatantha (DC.) R.M.King & H.Rob.	0.00630252
Urtica gracilis Aiton	0.00630252
Valeriana polybotrya (Griseb.) Höck	0.00630252
Varronia curassavica Jacq.	0.00630252
Vigna luteola (Jacq.) Benth.	0.00630252
Xanthium ambrosioides Hook. & Arn.	0.00630252
Xylosma pubescens Griseb.	0.00630252
Zephyranthes saltensis (Ravenna) S.C.Arroyo	0.00630252
Abutilon terminale (Cav.) A.St.-Hil.	*
Acicarpha tribuloides Juss.	*
Adesmia lotoides Hook.f.	*
Agalinis communis (Cham. & Schltdl.) D'Arcy	*
Amelichloa ambigua (Speg.) Arriaga & Barkworth	*
Androtrichum giganteum (Kunth) H.Pfeiff.	*
Anoda cristata (L.) Schltdl.	*
Anthurium paraguayense Engl.	*
Aristolochia angustifolia Cham.	*
Aristolochia prostrata Duch.	*
Atriplex argentina Speg.	*
Atriplex patagonica (Moq.) D.Dietr.	*
Austroeupatorium inulifolium (Kunth) R.M.King & H.Rob.	*
Azorella filamentosa Lam.	*
Azorella lycopodioides Gaudich.	*
Azorella selago Hook.f.	*
Baccharis darwinii Hook. & Arn.	*
Baccharis juncea (Cass.) Desf.	*
Baccharis microcephala (Less.) DC.	*
Bolax bovei (Speg.) Dusén	*
Bougainvillea campanulata Heimerl	*
Brachystele camporum (Lindl.) Schltr.	*
Butia paraguayensis (Barb.Rodr.) L.H.Bailey	*
Caiophora chuquitensis (Meyen) Urb. & Gilg	*
Calceolaria schickendantziana Kraenzl.	*
Castela tweedii Planch.	*
Cephalanthus glabratus (Spreng.) K.Schum.	*
Chaerophyllum andicola (Kunth) K.F.Chung	*
Cheilanthes pruinata Kaulf.	*
Chromolaena arnottiana (Griseb.) R.M.King & H.Rob.	*
Chromolaena laevigata (Lam.) R.M.King & H.Rob.	*
Cienfuegosia sulphurea (A.St.-Hil.) Garcke	*
Cnidoscolus loasoides (Pax) I.M.Johnst.	*
Commelina platyphylla Klotzsch ex Seub.	*
Commelina tuberosa L.	*
Cosmos peucedanifolius Wedd.	*
Crotalaria micans Link	*
Cuphea lysimachioides Cham. & Schltdl.	*
Cuscuta obtusiflora Kunth	*
Cuscuta platyloba Progel	*
Descurainia antarctica (E.Fourn.) O.E.Schulz	*
Digitaria californica (Benth.) Henrard	*
Distichlis spicata (L.) Greene	*
Drymaria glandulosa Bartl.	*
Dysphania chilensis (Schrad.) Mosyakin & Clemants	*
Elymus magellanicus (E.Desv.) A.Löve	*
Eryngium echinatum Urb.	*
Eryngium nudicaule Lam.	*
Euphorbia prostrata Aiton	*
Festuca gracillima Hook.f.	*
Festuca hieronymi Hack.	*
Festuca pallescens (St.-Yves) Parodi	*
Galianthe eupatorioides (Cham. & Schltdl.) E.L.Cabral	*
Gamochaeta calviceps (Fernald) Cabrera	*
Gaultheria myrsinoides Kunth	*
Gomphrena boliviana Moq.	*
Grandiphyllum pulvinatum (Lindl.) Docha Neto	*
Gutierrezia mandonii (Sch.Bip.) Solbrig	*
Heterosperma ovatifolium Cav.	*
Hoffmannseggia glauca (Ortega) Eifert	*
Hordeum comosum J.Presl	*
Jatropha pedersenii Lourteig	*
Juncus acutus L.	*
Lupinus paraguariensis Chodat & Hassl.	*
Lycium tenuispinosum Miers	*
Macroscepis aurea E.Fourn.	*
Mandevilla petraea (A.St.-Hil.) Pichon	*
Maytenus magellanica (Lam.) Hook.f.	*
Mimosa balansae Micheli	*
Misodendrum punctulatum DC.	*
Mutisia acuminata Ruiz & Pav.	*
Nierembergia pulchella Gillies ex Miers	*
Nothofagus betuloides (Mirb.) Oerst.	*
Ocimum ovatum Benth.	*
Oenothera mollissima L.	*
Panicum bergii Arechav.	*
Pappostipa humilis (Cav.) Romasch.	*
Paspalum distichum L.	*
Passiflora cincinnata Mast.	*
Passiflora suberosa L.	*
Pavonia argentina Gürke	*
Pellaea ternifolia (Cav.) Link	*
Peperomia aceroana C.DC.	*
Phoradendron argentinum Urb.	*
Pleopeltis pinnatifida Gillies ex Hook. & Grev.	*
Poa ligularis Nees ex Steud.	*
Porophyllum lanceolatum DC.	*
Prosopanche bonacinai Speg.	*
Pterocactus tuberosus (Pfeiff.) Britton & Rose	*
Pterocaulon angustifolium DC.	*
Pterocaulon rugosum (Vahl) Malme	*
Pycnophyllum bryoides (Phil.) Rohrb.	*
Ranunculus bonariensis Poir.	*
Rubus geoides Sm.	*
Schizachyrium condensatum (Kunth) Nees	*
Schizachyrium spicatum (Spreng.) Herter	*
Schoenoplectus americanus (Pers.) Volkart ex Schinz & R.Keller	*
Serpocaulon lasiopus (Klotzsch) A.R.Sm.	*
Sida argentina K. Schum.	*
Sisyrinchium pachyrhizum Baker	*
Sisyrinchium vaginatum Spreng.	*
Solanum pilcomayense Morong	*
Stachys gilliesii Benth.	*
Symphyotrichum squamatum (Spreng.) G.L.Nesom	*
Thaumatophyllum tweedieanum (Schott ex Endl.) Sakur., Calazans & Mayo	*
Tillandsia pedicellata (Mez) A.Cast.	*
Trichocline auriculata (Wedd.) Hieron.	*
Trifolium polymorphum Poir.	*
Tripogandra glandulosa (Seub.) Rohweder	*
Trixis pallida Less.	*
Typha subulata Crespo & R.L.Pérez-Mor.	*
Urera aurantiaca Wedd.	*
Urvillea pterocarpa (Radlk.) Acev.-Rodr. & Ferrucci	*
Xylosma venosa N.E.Br.	*
* For calculate weighted RI we excluded articles where the use of plants was reported for more than one province without distinction between them. However, we included all useful species at the end of the table.

## Sheet: Table S4
Supplementary Table S4
Number of species used by family and use category
Family	Food	Food Additives	Animal Food	Bee Plants	Invertebrate Food	Materials	Fuels	Social Uses	Vertebrate Poisons	Non-Vertebrate Poisons	Medicines	Environmental Uses
Acanthaceae	0	0	8	0	0	1	0	0	0	0	6	1
Achatocarpaceae	0	0	1	0	0	1	1	0	1	0	1	0
Alismataceae	0	0	2	0	0	0	0	0	0	0	0	0
Alstroemeriaceae	2	0	0	0	0	0	0	0	0	0	2	2
Amaranthaceae	5	5	16	0	0	8	3	9	0	1	25	0
Amaryllidaceae	3	0	1	0	0	0	0	1	0	0	6	3
Anacardiaceae	7	2	7	1	0	8	9	5	0	0	17	7
Anemiaceae	0	1	1	0	0	0	0	1	0	0	3	0
Annonaceae	4	0	0	0	0	0	1	0	0	0	4	0
Apiaceae	13	3	2	0	0	0	5	0	0	0	23	0
Apocynaceae	19	2	10	0	0	11	6	8	4	2	24	2
Aquifoliaceae	2	0	0	0	0	1	1	1	0	0	1	1
Araceae	2	1	2	0	0	1	0	4	1	0	6	1
Araliaceae	1	0	1	0	0	0	0	0	0	0	9	0
Araucariaceae	2	0	0	0	0	1	0	1	0	0	2	1
Arecaceae	6	0	2	0	2	6	0	0	0	0	5	0
Aristolochiaceae	3	0	2	0	0	1	0	6	1	0	10	0
Asparagaceae	0	0	0	0	0	0	0	0	0	0	2	0
Asteraceae	11	13	55	1	0	40	20	44	11	8	188	7
Balanophoraceae	0	0	0	0	0	0	0	0	0	0	1	0
Basellaceae	1	0	0	0	0	0	0	0	0	0	2	0
Begoniaceae	0	0	0	0	0	0	0	0	0	0	1	0
Berberidaceae	5	0	0	0	0	4	2	0	0	0	5	1
Betulaceae	0	0	1	0	0	1	0	0	0	0	0	0
Bignoniaceae	1	0	4	0	0	15	6	6	0	0	17	4
Bixaceae	0	1	0	0	0	1	0	0	0	0	0	0
Blechnaceae	0	0	0	0	0	0	0	1	0	0	3	0
Boraginaceae	0	0	4	0	0	3	3	3	0	1	16	1
Brassicaceae	2	0	0	0	0	0	0	2	0	0	4	0
Bromeliaceae	7	0	20	0	0	7	0	6	0	0	19	12
Cabombaceae	0	0	0	0	0	0	0	0	0	0	0	1
Cactaceae	33	4	16	0	0	5	3	11	1	0	28	9
Calceolariaceae	0	0	0	0	0	0	0	0	0	0	3	0
Calyceraceae	1	0	0	0	0	0	0	0	0	0	3	0
Campanulaceae	0	0	0	0	0	0	0	0	0	0	1	0
Cannabaceae	4	0	3	0	0	3	4	1	0	0	5	2
Cannaceae	2	0	1	0	0	2	0	1	0	0	2	1
Capparaceae	6	0	5	1	0	1	4	3	5	0	6	0
Caprifoliaceae	0	0	0	0	0	0	0	0	0	0	4	0
Cardiopteridaceae	1	0	0	0	0	0	1	0	0	0	0	0
Caricaceae	3	0	0	0	0	0	0	0	0	0	0	0
Caryophyllaceae	0	0	1	0	0	0	0	0	0	0	8	0
Celastraceae	2	2	2	0	0	2	3	1	0	0	8	1
Ceratophyllaceae	0	0	1	0	0	0	0	0	0	0	0	0
Cleomaceae	0	0	0	0	0	0	0	0	0	0	1	0
Columelliaceae	0	0	0	0	0	0	0	0	0	0	1	0
Combretaceae	1	0	0	0	0	1	0	0	0	0	1	0
Commelinaceae	1	0	1	0	0	0	0	1	0	0	7	1
Convolvulaceae	3	0	1	0	0	1	0	5	0	0	9	2
Coriariaceae	0	0	0	0	0	0	0	0	0	0	1	0
Cucurbitaceae	5	0	2	0	0	0	0	0	0	0	7	0
Cupressaceae	0	0	0	0	0	0	1	0	0	0	1	1
Cyperaceae	1	0	6	0	0	6	0	2	0	0	9	0
Dennstaedtiaceae	0	0	0	0	0	1	0	0	1	0	2	0
Dioscoreaceae	3	0	0	0	0	0	0	0	0	0	1	0
Dryopteridaceae	0	0	0	0	0	0	0	1	0	0	3	0
Elaeocarpaceae	1	0	0	0	0	0	0	0	0	0	1	0
Ephedraceae	3	0	5	0	0	0	2	1	0	0	5	0
Equisetaceae	0	0	0	0	0	0	0	0	0	0	2	0
Ericaceae	4	0	0	0	0	0	0	1	1	0	0	0
Erythroxylaceae	0	0	1	0	0	1	2	0	0	0	0	0
Escalloniaceae	0	0	0	0	0	0	0	0	0	0	2	0
Euphorbiaceae	0	0	6	0	0	9	5	7	4	1	38	2
Fabaceae	26	4	50	0	0	50	50	22	14	2	97	18
Francoaceae	1	0	0	0	0	0	0	0	0	0	1	0
Gentianaceae	0	0	0	0	0	0	0	0	0	0	3	0
Geraniaceae	0	0	2	0	0	0	0	0	0	0	1	0
Gesneriaceae	0	0	0	0	0	0	0	0	0	0	1	0
Grossulariaceae	2	0	0	0	0	1	0	1	0	0	4	0
Gunneraceae	3	0	0	0	0	0	0	0	0	0	4	0
Hydrocharitaceae	0	0	1	0	0	0	0	0	0	0	1	0
Hydroleaceae	0	0	0	0	0	0	0	1	0	0	0	0
Hypericaceae	0	0	0	0	0	0	0	1	0	0	2	0
Iridaceae	1	0	0	0	0	0	0	0	0	0	7	0
Juglandaceae	1	0	1	0	0	1	1	0	0	0	1	0
Juncaceae	0	0	0	0	0	3	0	0	0	0	3	1
Krameriaceae	0	0	0	0	0	0	0	0	0	0	1	0
Lamiaceae	3	4	8	0	0	5	2	6	1	1	22	1
Lardizabalaceae	0	0	0	0	0	0	0	0	0	0	1	0
Lauraceae	0	0	0	0	0	2	3	1	0	0	4	0
Linaceae	0	0	0	0	0	0	0	0	0	0	1	0
Loasaceae	1	0	0	0	0	0	0	1	1	0	4	0
Loganiaceae	0	0	0	0	0	0	1	0	0	0	1	0
Loranthaceae	0	0	3	0	0	2	0	3	0	0	5	0
Lycopodiaceae	0	0	0	0	0	0	0	1	1	0	2	1
Lythraceae	0	1	1	0	0	1	0	2	1	1	4	0
Malpighiaceae	1	0	2	0	0	1	0	0	0	0	6	0
Malvaceae	1	1	9	0	1	11	4	6	3	0	33	1
Marantaceae	1	0	1	0	0	2	0	1	0	0	1	0
Marsileaceae	0	0	1	0	0	0	0	0	0	0	0	0
Martyniaceae	0	0	0	0	0	0	0	0	0	0	2	0
Meliaceae	1	0	1	0	0	6	2	1	0	0	7	1
Menispermaceae	1	0	0	0	0	0	0	1	0	0	1	0
Menyanthaceae	0	0	0	0	0	0	0	0	0	0	1	0
Misodendraceae	0	0	0	0	0	0	0	0	0	0	1	0
Monimiaceae	0	0	0	0	0	0	0	1	0	0	1	0
Moraceae	3	0	1	0	0	2	1	2	0	0	4	0
Myrtaceae	31	1	2	0	0	7	10	1	0	0	19	3
Nothofagaceae	1	0	0	0	0	3	2	0	0	0	4	1
Nyctaginaceae	1	2	3	0	0	3	2	2	1	0	2	1
Nymphaeaceae	2	0	1	0	0	0	0	0	0	0	1	0
Olacaceae	1	0	1	0	0	1	1	0	0	0	1	1
Oleaceae	0	0	0	0	0	0	0	0	1	0	0	0
Onagraceae	0	0	2	0	0	0	0	0	0	0	9	1
Orchidaceae	0	0	1	0	0	6	0	4	0	0	10	41
Orobanchaceae	0	0	0	0	0	1	0	0	0	0	4	0
Osmundaceae	0	0	0	0	0	0	0	0	0	0	1	0
Oxalidaceae	6	0	1	0	0	0	0	3	0	0	6	1
Papaveraceae	0	0	1	0	0	1	0	1	0	0	2	0
Passifloraceae	7	0	4	0	0	1	0	0	0	0	11	2
Petiveriaceae	1	0	0	0	0	1	0	2	0	1	3	0
Phrymaceae	1	0	0	0	0	0	0	0	0	0	1	0
Phyllanthaceae	0	0	0	0	0	0	0	0	0	0	2	0
Phytolaccaceae	0	0	0	0	0	2	0	1	0	0	1	0
Piperaceae	0	0	0	0	0	1	0	2	0	0	11	1
Plantaginaceae	1	0	8	0	0	0	1	2	0	0	11	0
Plumbaginaceae	0	0	0	0	0	1	0	0	0	0	2	0
Poaceae	3	1	81	0	2	34	2	8	3	0	29	11
Podocarpaceae	1	0	0	0	0	1	0	0	0	0	0	0
Polygalaceae	0	0	0	0	0	0	0	0	0	0	1	0
Polygonaceae	4	1	7	0	0	4	3	1	1	0	12	1
Polypodiaceae	0	0	2	0	0	0	0	3	0	0	7	0
Pontederiaceae	2	0	1	0	0	1	0	0	0	0	1	0
Portulacaceae	1	0	1	0	0	2	0	0	0	0	2	0
Primulaceae	0	0	0	0	0	2	0	0	1	0	1	0
Proteaceae	1	0	0	0	0	0	0	0	0	0	3	2
Pteridaceae	0	0	2	0	0	0	0	11	2	0	18	2
Ranunculaceae	0	0	3	0	0	0	0	2	1	0	8	0
Rhamnaceae	4	0	5	0	0	4	9	1	0	0	10	1
Rosaceae	6	0	2	0	0	8	2	3	0	0	17	0
Rubiaceae	0	0	1	0	0	7	1	3	0	0	13	0
Rutaceae	0	0	0	0	0	7	6	1	0	1	8	0
Salicaceae	0	0	1	0	0	2	4	2	0	0	5	0
Salviniaceae	0	0	2	0	0	0	0	1	0	0	1	0
Santalaceae	2	0	4	0	0	2	1	3	1	0	7	1
Sapindaceae	3	0	3	0	0	7	2	2	5	0	13	0
Sapotaceae	4	0	1	0	0	2	2	0	0	0	3	0
Schoepfiaceae	2	1	0	0	0	0	0	0	0	0	1	0
Scrophulariaceae	0	0	3	0	0	0	0	0	0	0	6	0
Selaginellaceae	0	0	1	0	0	0	0	0	1	0	0	0
Simaroubaceae	0	0	1	0	0	1	2	2	0	0	3	1
Smilacaceae	1	0	0	0	0	1	0	0	0	0	1	0
Solanaceae	16	7	28	0	0	12	14	12	11	0	50	6
Styracaceae	0	0	0	0	0	1	0	0	0	0	1	0
Thelypteridaceae	0	0	0	0	0	0	0	1	0	0	1	0
Thymelaeaceae	0	0	0	0	0	1	0	0	0	0	1	0
Tropaeolaceae	2	0	0	0	0	0	0	0	0	0	1	0
Typhaceae	1	0	1	0	0	3	0	0	0	0	2	0
Ulmaceae	0	1	1	0	0	1	0	0	0	0	0	0
Urticaceae	1	0	1	0	0	1	1	2	0	0	9	0
Verbenaceae	5	5	16	0	0	9	5	5	0	1	38	5
Viburnaceae	1	0	0	0	0	1	0	0	0	0	2	0
Violaceae	0	0	1	0	0	0	0	0	0	0	4	1
Vitaceae	0	0	0	0	0	0	0	1	0	0	5	0
Winteraceae	0	0	0	0	0	1	0	1	1	0	1	0
Zygophyllaceae	0	1	6	0	0	7	5	4	1	0	8	2
TOTAL	328	64	470	3	5	379	221	271	81	20	1182	171

## Sheet: Table S5
Supplementary Table S5
Weighted Relative Frequency of Citation (RFC) of medicinal species in Argentina
Medicinal species	RFC_ARG
Dysphania ambrosioides (L.) Mosyakin & Clemants	0.830688
Aloysia citrodora Palau	0.487302
Equisetum giganteum L.	0.468915
Aloysia polystachya (Griseb.) Moldenke	0.405952
Xanthium spinosum L.	0.387963
Equisetum bogotense Kunth	0.326389
Schinus group (Schinus areira L. + Schinus molle L.)	0.322619
Adesmia boronioides Hook.f.	0.310185
Fabiana imbricata Ruiz & Pav.	0.291336
Solanum sisymbriifolium Lam.	0.289286
Ilex paraguariensis A.St.-Hil.	0.288624
Baccharis trimera (Less.) DC.	0.284392
Clinopodium gilliesii (Benth.) Kuntze	0.281746
Achyrocline satureioides (Lam.) DC.	0.272222
Geoffroea decorticans (Gillies ex Hook. & Arn.) Burkart	0.270238
Nicotiana glauca Graham	0.268254
Lippia turbinata Griseb.	0.26746
Baccharis salicifolia (Ruiz & Pav.) Pers.	0.266005
Bauhinia forficata Link	0.264683
Lepidium didymum L.	0.261111
Valeriana carnosa Sm.	0.252315
Cyclolepis genistoides Gillies ex D.Don	0.245635
Alternanthera pungens Kunth	0.243651
Salvia cuspidata Ruiz & Pav.	0.242857
Passiflora caerulea L.	0.238889
Baccharis sagittalis (Less.) DC.	0.233796
Dysphania mandonii (S.Watson) Mosyakin & Clemants	0.231349
Larrea divaricata Cav.	0.229101
Ribes magellanicum Poir.	0.226852
Azorella prolifera (Cav.) G.M.Plunkett & A.N.Nicolas	0.222222
Petiveria alliacea L.	0.218254
Vachellia aroma (Gillies ex Hook. & Arn.) Seigler & Ebinger	0.19881
Aloysia gratissima (Gillies & Hook. ex Hook.) Tronc.	0.19246
Centaurium cachanlahuen (Molina) B.L.Rob.	0.189815
Schinus johnstonii F.A.Barkley✤	0.186177
Solanum crispum Ruiz & Pav.	0.185516
Buddleja globosa Hope	0.18287
Commelina erecta L.	0.18254
Eugenia uniflora L.	0.18254
Smilax campestris Griseb.	0.178175
Sida rhombifolia L.	0.177381
Baccharis articulata (Lam.) Pers.	0.176587
Minthostachys verticillata (Griseb.) Epling✤	0.176587
Tagetes minuta L.	0.17619
Buddleja araucana Phil.	0.175926
Senecio filaginoides DC.	0.175926
Ligaria cuneifolia (Ruiz & Pav.) Tiegh.	0.173016
Acaena splendens Hook. & Arn.	0.171296
Krameria lappacea (Dombey) Burdet & B.B.Simpson	0.166667
Quinchamalium chilense Molina	0.164352
Plantago australis Lam.	0.16369
Euphorbia serpens Kunth	0.162698
Larrea nitida Cav.	0.157407
Hedeoma multiflora Benth.	0.150794
Gunnera tinctoria (Molina) Mirb.	0.150463
Argemone subfusiformis G.B.Ownbey	0.146825
Vachellia caven (Molina) Seigler & Ebinger	0.145635
Atamisquea emarginata Miers ex Hook. & Arn.	0.144444
Pluchea sagittalis (Lam.) Cabrera	0.138889
Dolichandra unguis-cati (L.) L.G.Lohmann	0.136905
Plantago tomentosa Lam.	0.136905
Verbena litoralis Kunth	0.136905
Cantinoa mutabilis (Rich.) Harley & J.F.B.Pastore	0.132937
Celtis group (Celtis tala Gillies ex Planch. + Celtis pallida Torr.)	0.13254
Aristotelia chilensis (Molina) Stuntz	0.131944
Chenopodium quinoa Willd.	0.129762
Acantholippia seriphioides (A.Gray) Moldenke✤	0.12963
Margyricarpus pinnatus (Lam.) Kuntze	0.129299
Lippia alba (Mill.) N.E.Br. ex Britton & P.Wilson	0.128968
Cecropia pachystachya Trécul	0.126984
Baccharis grisebachii Hieron.	0.125
Bidens andicola Kunth	0.125
Tessaria absinthioides (Hook. & Arn.) DC.	0.125
Ephedra triandra Tul. emend. J.H.Hunz.	0.124603
Cestrum parqui L'Hér.	0.12414
Cucurbita maxima Duchesne	0.12381
Cortaderia selloana (Schult. & Schult.f.) Asch. & Graebn.	0.123016
Parthenium hysterophorus L.	0.121032
Maytenus boaria Molina	0.119048
Aloysia salsoloides (Griseb.) Lu-Irving & O'Leary	0.116667
Celtis iguanaea (Jacq.) Sarg.	0.115873
Tagetes filifolia Lag.	0.115079
Salix humboldtiana Willd.	0.113889
Hypericum connatum Lam.	0.113095
Lippia integrifolia (Griseb.) Hieron.	0.112698
Sphaeralcea bonariensis (Cav.) Griseb.	0.112698
Clinopodium darwinii (Benth.) Kuntze	0.111111
Phyllanthus sellowianus (Klotzsch) Müll.Arg.	0.111111
Xenophyllum poposa (Phil.) V.A.Funk	0.108333
Araujia odorata (Hook. & Arn.) Fontella & Goyder	0.107937
Trixis divaricata (Kunth) Spreng.	0.107937
Jodina rhombifolia (Hook. & Arn.) Reissek	0.107143
Monteverdia ilicifolia (Mart. ex Reissek) Biral	0.107143
Anredera cordifolia (Ten.) Steenis	0.105159
Gaillardia megapotamica (Spreng.) Baker	0.103175
Heimia salicifolia Link	0.10119
Lepidium meyenii Walp.	0.10119
Schkuhria pinnata (Lam.) Kuntze ex Thell.	0.10119
Airampoa ayrampo (Azara) Doweld	0.1
Tecoma stans (L.) Juss. ex Kunth	0.1
Polygonum punctatum Elliott	0.0992063
Amaranthus muricatus (Moq.) Hieron.	0.0972222
Aspidosperma quebracho-blanco Schltdl.	0.0972222
Microgramma squamulosa (Kaulf.) de la Sota	0.0972222
Senna corymbosa (Lam.) H.S.Irwin & Barneby	0.0972222
Zanthoxylum rhoifolium Lam.	0.0972222
Ephedra ochreata Miers	0.0949074
Allophylus edulis (A.St.-Hil., A.Juss. & Cambess.) Hieron. ex Niederl.	0.0940476
Neltuma nigra (Griseb.) C.E.Hughes & G.P.Lewis	0.0940476
Sambucus australis Cham. & Schltdl.	0.093254
Grindelia chiloensis (Cornel.) Cabrera	0.0925926
Ochetophila trinervis (Gillies ex Hook. & Arn.) Poepp. ex Miers	0.0925926
Phlegmariurus saururus (Lam.) B. Øllg.	0.0912698
Lomatia hirsuta (Lam.) Diels	0.0902778
Cuphea glutinosa Cham. & Schltdl.	0.0892857
Euphorbia collina Phil.	0.087963
Ambrosia tenuifolia Spreng.	0.0873016
Neltuma alba (Griseb.) C.E.Hughes & G.P.Lewis	0.0857143
Phytolacca dioica L.	0.0853175
Schinus fasciculatus (Griseb.) I.M.Johnst.	0.084127
Tripodanthus acutifolius (Ruiz & Pav.) Tiegh.	0.084127
Acaulimalva nubigena (Walp.) Krapov.	0.0833333
Achyrocline alata (Kunth) DC.	0.0833333
Adiantopsis chlorophylla (Sw.) Fée	0.0833333
Ageratum conyzoides L.	0.0833333
Austrocedrus chilensis (D.Don) Pic.Serm. & Bizzarri	0.0833333
Baccharis crispa Spreng.	0.0833333
Baccharis linearifolia (Lam.) Pers.	0.0833333
Bougainvillea stipitata Griseb.	0.0833333
Buddleja tucumanensis Griseb.	0.0833333
Caiophora lateritia Klotzsch	0.0833333
Chuquiraga acanthophylla Wedd.	0.0833333
Cortaderia speciosa (Nees & Meyen) Stapf	0.0833333
Diatenopteryx sorbifolia Radlk.	0.0833333
Escallonia megapotamica Spreng.	0.0833333
Gonopterodendron sarmientoi (Lorentz ex Griseb.) A.C.Godoy-Bürki	0.0833333
Gunnera apiculata Schindl.	0.0833333
Hypolepis poeppigii (Kunze) R.Rodr.	0.0833333
Myriopteris myriophylla (Desv.) J.Sm.	0.0833333
Myroxylon peruiferum L.f.	0.0833333
Neltuma ruscifolia (Griseb.) C.E.Hughes & G.P.Lewis	0.0833333
Ocotea porphyria (Griseb.) van der Werff	0.0833333
Pentaphorus glutinosus D.Don	0.0833333
Peperomia tominana C.DC.	0.0833333
Piper aduncum L.	0.0833333
Rhipsalis floccosa Pfeiff.	0.0833333
Sambucus peruviana Kunth	0.0833333
Schinus marchandii F.A.Barkley	0.0833333
Senna birostris (Dombey ex Vogel) H.S.Irwin & Barneby	0.0833333
Solanum tripartitum Dunal	0.0833333
Strombocarpa ferox (Griseb.) C.E.Hughes & G.P.Lewis	0.0833333
Tagetes terniflora Kunth	0.0833333
Tarasa antofagastana (Phil.) Krapov.	0.0833333
Tarasa tenella (Cav.) Krapov.	0.0833333
Tetraglochin cristata (Britton) Rothm.	0.0833333
Anemia tomentosa (Savigny) Sw.	0.0813492
Chaptalia nutans (L.) Pol.	0.0813492
Plantago myosuros Lam.	0.0813492
Verbesina encelioides (Cav.) Benth. & Hook.f. ex A.Gray	0.0793651
Clematis montevidensis Spreng.	0.0789683
Berberis microphylla G.Forst.	0.0787037
Oxalis adenophylla Gillies ex Hook. & Arn.	0.0787037
Ribes cucullatum Hook. & Arn.	0.0787037
Senecio nutans Sch.Bip.	0.0777778
Croton argenteus L.	0.077381
Solidago chilensis Meyen	0.0757275
Elaphoglossum gayanum (Fée) T.Moore	0.0753968
Scoparia montevidensis (Spreng.) R.E.Fr.	0.0753968
Azorella compacta Phil.	0.075
Solanum palitans C.V.Morton	0.075
Chrysophyllum gonocarpum (Mart. & Eichler) Engl.	0.0734127
Cissampelos pareira L.	0.0734127
Stachytarpheta cayennensis (Rich.) Vahl	0.0734127
Viola maculata Cav.	0.0717593
Sarcomphalus mistol (Griseb.) Hauenschild	0.0714286
Baccharis coridifolia DC.	0.0714286
Apium sellowianum H.Wolff	0.0694444
Aristolochia triangularis Cham.	0.0694444
Embothrium coccineum J.R.Forst. & G.Forst.	0.0694444
Lophophytum leandri Eichler	0.0694444
Ocotea puberula (Rich.) Nees	0.0694444
Parastrephia quadrangularis (Meyen) Cabrera	0.0694444
Zanthoxylum petiolare A.St.-Hil. & Tul.	0.0694444
Larrea cuneifolia Cav.	0.0690476
Sida cordifolia L.	0.0690476
Bidens subalternans DC.	0.0674603
Blepharocalyx salicifolius (Kunth) O.Berg	0.0674603
Capsicum chacoense Hunz.	0.0674603
Conyza bonariensis (L.) Cronquist	0.0674603
Handroanthus heptaphyllus (Vell.) Mattos	0.0674603
Zanthoxylum coco Gillies ex Hook.f. & Arn.	0.0654762
Ambrosia artemisiifolia L.	0.0634921
Buddleja stachyoides Cham. & Schltdl.	0.0634921
Cyclospermum leptophyllum (Pers.) Britton & P.Wilson	0.0634921
Gomesa bifolia (Sims) M.W.Chase & N.H.Williams	0.0634921
Phyllanthus niruri L.	0.0634921
Porlieria microphylla (Baill.) Descole, O'Donell & Lourteig	0.0634921
Sapium haematospermum Müll.Arg.	0.0634921
Thelesperma megapotamicum (Spreng.) Kuntze	0.0634921
Phacelia secunda J.F.Gmel.	0.0625
Erythrina crista-galli L.	0.0615079
Aristolochia argentina Griseb.	0.0603175
Acaena pinnatifida Ruiz & Pav.	0.0601852
Fuchsia magellanica Lam.	0.0601852
Bidens pilosa L.	0.0595238
Acanthospermum australe (Loefl.) Kuntze	0.0595238
Acanthostyles buniifolius (Hook. & Arn.) R.M.King & H.Rob.	0.0595238
Buddleja cordobensis Griseb.	0.0595238
Ficus luschnathiana (Miq.) Miq.	0.0595238
Jungia polita Griseb.	0.0595238
Lithraea molleoides (Vell.) Engl.	0.0595238
Monnina dictyocarpa Griseb.	0.0595238
Tipuana tipu (Benth.) Kuntze	0.0583333
Verbena hispida Ruiz & Pav.	0.0583333
Eryngium paniculatum Cav. & Dombey ex F.Delaroche	0.0578704
Handroanthus impetiginosus (Mart. ex DC.) Mattos	0.0575397
Achyrocline flaccida (Weinm.) DC.	0.0555556
Adiantum raddianum C.Presl	0.0555556
Austrobrickellia patens (D.Don ex Hook. & Arn.) R.M.King & H.Rob.	0.0555556
Baccharis spartioides (Hook. & Arn. ex DC.) J.Remy	0.0555556
Begonia cucullata Willd.	0.0555556
Campomanesia guazumifolia (Cambess.) O.Berg	0.0555556
Campomanesia xanthocarpa O.Berg	0.0555556
Centella asiatica (L.) Urb.	0.0555556
Chusquea ramosissima Lindm.	0.0555556
Erythrina falcata Benth.	0.0555556
Gomphrena mendocina (Phil.) R.E.Fr.	0.0555556
Hyalis argentea D.Don ex Hook. & Arn.	0.0555556
Jacaranda micrantha Cham.	0.0555556
Muellera campestris (Mart. ex Benth.) M.J.Silva & A.M.G.Azevedo	0.0555556
Passiflora edulis Sims	0.0555556
Picrasma crenata (Vell.) Engl.	0.0555556
Schnella microstachya Raddi	0.0555556
Tagetes pauciloba DC.✤	0.0555556
Urera baccifera (L.) Gaudich.	0.0555556
Nicotiana longiflora Cav.	0.0543651
Canna indica L.	0.0535714
Chenopodium hircinum Schrad.	0.0535714
Lepechinia vesiculosa (Benth.) Epling	0.0535714
Tabebuia nodosa (Griseb.) Griseb.	0.0535714
Buddleja mendozensis Benth.	0.052381
Turnera sidoides L.	0.052381
Lantana camara L.	0.0515873
Passiflora mooreana Hook.f.	0.0515873
Acaena ovalifolia Ruiz & Pav.	0.0509259
Apium australe Thouars	0.0509259
Baccharis obovata Hook. & Arn.	0.0509259
Geranium berteroanum Colla	0.0509259
Osmorhiza berteroi DC.	0.0509259
Schinus patagonica (Phil.) I.M.Johnst. ex Cabrera	0.0509259
Anadenanthera colubrina (Vell.) Brenan	0.0496032
Gleditsia amorphoides (Griseb.) Taub.	0.0496032
Lepechinia floribunda (Benth.) Epling	0.0496032
Lycium cestroides Schltdl.	0.0496032
Phoradendron bathyoryctum Eichler	0.0496032
Tessaria dodoneifolia (Hook. & Arn.) Cabrera	0.0496032
Xanthium strumarium L.	0.0496032
Dichondra sericea Sw.	0.0489418
Azorella monantha Clos	0.0486111
Croton subpannosus Müll.Arg. ex Griseb.	0.047619
Dolichandra cynanchoides Cham.	0.047619
Limonium brasiliense (Boiss.) Kuntze	0.0462963
Spegazziniophytum patagonicum (Speg.) Esser	0.0462963
Acrocomia aculeata (Jacq.) Lodd. ex Mart.	0.0456349
Adiantum poiretii Wikstr.	0.0456349
Gomphrena celosioides Mart.	0.0456349
Polylepis australis Bitter	0.0456349
Psidium guajava L.	0.0456349
Tabernaemontana catharinensis A.DC.	0.0456349
Vassobia breviflora (Sendtn.) Hunz.	0.0456349
Libidibia paraguariensis (D.Parodi) G.P.Lewis	0.0456349
Pseudognaphalium gaudichaudianum (DC.) Anderb.	0.0456349
Senna aphylla (Cav.) H.S.Irwin & Barneby	0.0449735
Erythrostemon gilliesii (Wall. ex Hook.) Klotzsch	0.0436508
Physalis viscosa L.	0.0436508
Achyrocline hyperchlora Blake	0.0416667
Adesmia inflexa Griseb.	0.0416667
Adiantum lorentzii Hieron.	0.0416667
Aechmea distichantha Lem.	0.0416667
Agalinis fiebrigii (Diels) D'Arcy	0.0416667
Allophylus guaraniticus (A.St.-Hil.) Radlk.	0.0416667
Amburana cearensis (Allemão) A.C.Sm.	0.0416667
Amomyrtella güili (Speg.) Kausel	0.0416667
Anemone multifida Poir.	0.0416667
Asclepias pilgeriana Schltr.	0.0416667
Austroblechnum penna-marina (Poir.) Gasper & V.A.O.Dittrich	0.0416667
Baccharis sculpta Griseb.	0.0416667
Bocconia integrifolia Bonpl.	0.0416667
Boehmeria caudata Sw.	0.0416667
Campovassouria cruciata (Vell.) R.M.King & H.Rob.	0.0416667
Campyloneurum aglaolepis (Alston) de la Sota	0.0416667
Capparicordis tweediana (Eichler) H.H.Iltis & Cornejo	0.0416667
Cedrela angustifolia DC.	0.0416667
Cereus stenogonus K.Schum.	0.0416667
Chiliophyllum densifolium Phil.	0.0416667
Chromolaena hookeriana (Griseb.) R.M.King & H.Rob.	0.0416667
Clematis haenkeana C.Presl	0.0416667
Clinopodium bolivianum (Benth.) Kuntze	0.0416667
Cuscuta grandiflora Kunth	0.0416667
Cyperus friburgensis Boeck.	0.0416667
Cyperus spectabilis Link	0.0416667
Dahlstedtia muehlbergiana (Hassl.) M.J.Silva & A.M.G.Azevedo	0.0416667
Dendrophorbium bomanii (R.E.Fr.) C.Jeffrey	0.0416667
Dodonaea viscosa Jacq.	0.0416667
Drimys winteri J.R.Forst. & G.Forst.	0.0416667
Duranta serratifolia (Griseb.) Kuntze	0.0416667
Eugenia pyriformis Cambess.	0.0416667
Gochnatia palosanto Cabrera	0.0416667
Gorgonidium vermicidum (Speg.) Bogner & Nicolson	0.0416667
Guarea macrophylla Vahl	0.0416667
Gunnera schindleri L.E.Mora	0.0416667
Handroanthus lapacho (K.Schum.) S.Grose	0.0416667
Heliotropium lilloi (I.M.Johnst.) Luebert	0.0416667
Hemionitis tomentosa (Lam.) Raddi	0.0416667
Jacaranda mimosifolia D.Don	0.0416667
Juglans australis Griseb.	0.0416667
Luehea divaricata Mart.	0.0416667
Maranta sobolifera L.Andersson	0.0416667
Maytenus verticillata (Ruiz & Pav.) DC.	0.0416667
Mimosa debilis Humb. & Bonpl. ex Willd.	0.0416667
Mimosa polycarpa Kunth	0.0416667
Mulguraea aspera (Gillies & Hook. ex Hook.) N.O'Leary & P.Peralta	0.0416667
Myoschilos oblongum Ruiz & Pav.	0.0416667
Myriopus paniculatus (Cham.) Feuillet	0.0416667
Myrocarpus frondosus Allemão	0.0416667
Nothofagus dombeyi (Mirb.) Oerst.	0.0416667
Nothofagus obliqua (Mirb.) Oerst.	0.0416667
Oreopanax kuntzei Harms	0.0416667
Ovidia andina (Poepp. & Endl.) Meisn.	0.0416667
Oxalis erythrorhiza Gillies ex Hook. & Arn.	0.0416667
Parapiptadenia excelsa (Griseb.) Burkart	0.0416667
Parapiptadenia rigida (Benth.) Brenan	0.0416667
Parastrephia lepidophylla (Wedd.) Cabrera	0.0416667
Paronychia chilensis DC.	0.0416667
Passiflora tenuifila Killip	0.0416667
Passiflora umbilicata (Griseb.) Harms	0.0416667
Pavonia sepium A.St.-Hil.	0.0416667
Peltophorum dubium (Spreng.) Taub.	0.0416667
Peperomia alata Ruiz & Pav.	0.0416667
Peperomia arifolia Miq.	0.0416667
Peperomia tetraphylla Hook. & Arn.	0.0416667
Peperomia theodori Trel.	0.0416667
Phoradendron tucumanensis Urb.	0.0416667
Pilocarpus pennatifolius Lem.	0.0416667
Piper mikanianum (Kunth) Steud.	0.0416667
Plantago orbignyana Steinh. ex Decne.	0.0416667
Pleopeltis macrocarpa (Bory ex Willd.) Kaulf.	0.0416667
Polystichum pycnolepis (Kunze ex Klotzsch) Hieron.	0.0416667
Psidium guineense Sw.	0.0416667
Rhipsalis lorentziana Griseb.	0.0416667
Ribes punctatum Ruiz & Pav.	0.0416667
Salvia atrocyanea Epling	0.0416667
Schinus meyeri F.A.Barkley	0.0416667
Scoparia dulcis L.	0.0416667
Scoparia plebeja Cham. & Schltdl.	0.0416667
Senecio clivicola Wedd.	0.0416667
Senecio cremeiflorus Mattf.	0.0416667
Senecio crepidifolius DC.	0.0416667
Senna crassiramea (Benth.) H.S.Irwin & Barneby	0.0416667
Senna spectabilis (DC.) H.S.Irwin & Barneby	0.0416667
Sida poeppigiana (K.Schum.) Fryxell	0.0416667
Smallanthus macroscyphus (Baker) A.Grau ex A.A.Sáenz	0.0416667
Solanum betaceum Cav.	0.0416667
Solanum trichoneuron Lillo	0.0416667
Solanum tucumanense Griseb.	0.0416667
Solanum viarum Dunal	0.0416667
Sorocea bonplandii (Baill.) W.C.Burger, Lanj. & Wess.Boer	0.0416667
Strychnos brasiliensis (Spreng.) Mart.	0.0416667
Tagetes campanulata Griseb.	0.0416667
Tillandsia australis Mez	0.0416667
Tillandsia usneoides (L.) L.	0.0416667
Trichocereus arboricola Kimnach	0.0416667
Tristerix corymbosus (L.) Kuijt	0.0416667
Ullucus tuberosus Caldas	0.0416667
Urera caracasana (Jacq.) Gaudich. ex Griseb.	0.0416667
Urtica circularis (Hicken) Sorarú	0.0416667
Urtica magellanica Poir.	0.0416667
Vachellia macracantha (Humb. & Bonpl. ex Willd.) Seigler & Ebinger	0.0416667
Vriesea friburgensis Mez	0.0416667
Wedelia brachylepis Griseb.	0.0416667
Schinopsis lorentzii (Griseb.) Engl.	0.0410053
Parkinsonia praecox (Ruiz & Pav. ex Hook.) Hawkins	0.0404762
Senecio bonariensis Hook. & Arn.	0.0398148
Acaena myriophylla Lindl.	0.0396825
Anemia australis (Mickel) M.Kessler & A.R.Sm.	0.0396825
Baccharis aliena (Spreng.) Joch.Müll.	0.0396825
Colletia spinosissima J.F.Gmel.	0.0396825
Croton argentinus Müll.Arg.	0.0396825
Gentianella multicaulis (Gillies ex Griseb.) Fabris	0.0396825
Heliotropium curassavicum L.	0.0396825
Microgramma vacciniifolia (Langsd. & Fisch.) Copel.	0.0396825
Neltuma chilensis (Molina) C.E.Hughes & G.P.Lewis	0.0396825
Phacelia pinnatifida Griseb. ex Wedd.	0.0396825
Pterocaulon alopecuroides (Lam.) DC.	0.0396825
Thymophylla pentachaeta (DC.) Small	0.0396825
Ephedra chilensis C.Presl	0.0393519
Fragaria chiloensis (L.) Mill.	0.0393519
Baccharis glutinosa Pers.	0.0386905
Anarthrophyllum rigidum (Gillies ex Hook. & Arn.) Hieron.	0.037037
Lycium chilense Miers ex Bertero	0.037037
Muehlenbeckia hastulata (Sm.) I.M.Johnst.	0.037037
Nassauvia axillaris (Lag. ex Lindl.) D.Don	0.037037
Zephyranthes gilliesiana (Herb.) Nic.García	0.037037
Salpichroa origanifolia (Lam.) Baill.	0.0365079
Achyrocline tomentosa Rusby	0.0357143
Amaranthus viridis L.	0.0357143
Condalia microphylla Cav.✤	0.0357143
Ephedra americana Humb. & Bonpl. ex Willd.	0.0357143
Maclura tinctoria (L.) Steud.	0.0357143
Polygonum acuminatum Kunth	0.0357143
Schinus longifolia (Lindl.) Speg.	0.0357143
Vallesia glabra (Cav.) Link	0.0357143
Atriplex lampa (Moq.) D.Dietr.✤	0.0351852
Croton lachnostachyus Baill.	0.0337302
Hydrocotyle bonariensis Lam.	0.0337302
Poiretia tetraphylla (Poir.) Burkart	0.0337302
Sideroxylon obtusifolium (Roem. & Schult.) T.D.Penn.	0.0337302
Cestrum lorentzianum Griseb.	0.0333333
Haplopappus rigidus Phil.	0.0333333
Maytenus viscifolia Griseb.	0.0333333
Heliotropium amplexicaule Vahl	0.0325397
Adiantum pseudotinctum Hieron.	0.031746
Baccharis spicata (Lam.) Baill.	0.031746
Berberis ruscifolia Lam.	0.031746
Cenchrus echinatus L.	0.031746
Cordia americana (L.) Gottschling & J.S.Mill.	0.031746
Croton bonplandianus Baill.	0.031746
Croton serratifolius Baill.	0.031746
Enterolobium contortisiliquum (Vell.) Morong	0.031746
Eryngium eburneum Decne.	0.031746
Eryngium horridum Malme	0.031746
Guilleminea densa (Humb. & Bonpl. ex Schult.) Moq.	0.031746
Heteropterys glabra Hook. & Arn.	0.031746
Lantana montevidensis (Spreng.) Briq.	0.031746
Neltuma flexuosa (DC.) C.E.Hughes & G.P.Lewis	0.031746
Polystichum montevidense (Spreng.) Rosenst.	0.031746
Pontederia crassipes Mart.	0.031746
Porophyllum ruderale (Jacq.) Cass.	0.031746
Trichocline reptans (Wedd.) Hieron.	0.031746
Armeria maritima (Mill.) Willd.	0.0300926
Chusquea culeou E.Desv.	0.0300926
Oxalis valdiviensis Barnéoud	0.0300926
Potentilla chiloensis (L.) Mabb.	0.0300926
Schinus odonellii F.A.Barkley	0.0300926
Senecio patagonicus Hook. & Arn.	0.0300926
Achatocarpus praecox Griseb.	0.0297619
Ipomoea carnea Jacq.	0.0297619
Parkinsonia aculeata L.	0.0297619
Phoradendron quadrangulare (Kunth) Griseb.	0.0297619
Abildgaardia ovata (Burm.f.) Kral	0.0277778
Acaena caespitosa Gillies ex Hook. & Arn.	0.0277778
Adesmia pinifolia Gillies ex Hook. & Arn.	0.0277778
Alternanthera brasiliana (L.) Kuntze	0.0277778
Anemia phyllitidis (L.) Sw.	0.0277778
Annona emarginata (Schltdl.) H.Rainer	0.0277778
Annona neosalicifolia H.Rainer	0.0277778
Apium panul (Bertero ex DC.) Reiche	0.0277778
Aralia warmingiana (Marchal) J.Wen	0.0277778
Artemisia mendozana DC.	0.0277778
Atriplex montevidensis Spreng.	0.0277778
Balbisia gracilis (Meyen) Hunz. & Ariza	0.0277778
Balfourodendron riedelianum (Engl.) Engl.	0.0277778
Bromelia balansae Mez	0.0277778
Bulnesia retama (Gillies ex Hook. & Arn.) Griseb.	0.0277778
Cabralea canjerana (Vell.) Mart.	0.0277778
Calycera herbacea Cav.	0.0277778
Casearia sylvestris Sw.	0.0277778
Cayaponia bonariensis (Mill.) Mart.Crov.	0.0277778
Cedrela fissilis Vell.	0.0277778
Cereus aethiops Haw.	0.0277778
Cissus verticillata (L.) Nicolson & C.E.Jarvis	0.0277778
Cuphea racemosa (L.f.) Spreng.	0.0277778
Dichorisandra hexandra (Aubl.) Standl.	0.0277778
Dolichlasium lagascae D.Don	0.0277778
Eryngium coronatum Hook. & Arn.	0.0277778
Euphorbia schickendantzii Hieron.	0.0277778
Fabiana patagonica Speg.	0.0277778
Fridericia mutabilis (Bureau & K.Schum.) Frazão & L.G.Lohmann	0.0277778
Glandularia tenera (Spreng.) Cabrera	0.0277778
Helietta apiculata Benth.	0.0277778
Hennecartia omphalandra J.Poiss.	0.0277778
Herreria bonplandii Lecomte	0.0277778
Herreria montevidensis Klotzsch ex Griseb.	0.0277778
Holocalyx balansae Micheli	0.0277778
Hydrocotyle leucocephala Cham. & Schltdl.	0.0277778
Hypochaeris chillensis (Kunth) Hieron.	0.0277778
Hysterionica glaucifolia (Kuntze) Solbrig	0.0277778
Manihot grahamii Hook.	0.0277778
Merostachys claussenii Munro	0.0277778
Modiola caroliniana (L.) G.Don	0.0277778
Modiolastrum malvifolium (Griseb.) K.Schum.	0.0277778
Monteverdia spinosa (Griseb.) Biral	0.0277778
Monttea aphylla (Miers) Benth. & Hook.	0.0277778
Muehlenbeckia sagittifolia (Ortega) Meisn.	0.0277778
Myracrodruon balansae (Engl.) Santin	0.0277778
Nectandra angustifolia (Schrad.) Nees & Mart.	0.0277778
Oreopolus glacialis (Poepp.) Ricardi	0.0277778
Panicum tricholaenoides Steud.	0.0277778
Pantacantha ameghinoi Speg.	0.0277778
Pharus lappulaceus Aubl.	0.0277778
Piptocarpha sellowii (Sch.Bip.) Baker	0.0277778
Plantago patagonica Jacq.	0.0277778
Plinia peruviana (Poir.) Govaerts	0.0277778
Plinia rivularis (Cambess.) Rotman	0.0277778
Rauvolfia sellowii Müll.Arg.	0.0277778
Ruprechtia apetala Wedd.	0.0277778
Salvia stachydifolia Benth.	0.0277778
Sapium glandulosum (L.) Morong	0.0277778
Schinus terebinthifolia Raddi	0.0277778
Sebastiania brasiliensis Spreng.	0.0277778
Senecio eriophyton J.Remy	0.0277778
Senecio gilliesii Hook. & Arn.	0.0277778
Senecio subulatus D.Don ex Hook. & Arn.	0.0277778
Senecio vira-vira Hieron.	0.0277778
Senna arnottiana (Gillies ex Hook.) H.S.Irwin & Barneby	0.0277778
Senna morongii (Britton) H.S.Irwin & Barneby	0.0277778
Sisyrinchium macrocarpum Hieron.	0.0277778
Solanum americanum Mill.	0.0277778
Solanum granulosum-leprosum Dunal	0.0277778
Solanum mauritianum Scop.	0.0277778
Sphaeralcea cordobensis Krapov.	0.0277778
Sphaeralcea mendocina Phil.	0.0277778
Strombocarpa strombulifera (Lam.) A.Gray	0.0277778
Struthanthus uraguensis (Hook. & Arn.) G.Don	0.0277778
Styrax leprosus Hook. & Arn.	0.0277778
Syagrus romanzoffiana (Cham.) Glassman	0.0277778
Tillandsia tricholepis Baker	0.0277778
Trichilia elegans A.Juss.	0.0277778
Trichocline cineraria (D.Don) Hook. & Arn.	0.0277778
Trichocline dealbata (Hook. & Arn.) Benth. & Hook.f. ex Griseb.	0.0277778
Tweedia brunonis Hook. & Arn.	0.0277778
Verbena intermedia Gillies & Hook. ex Hook.	0.0277778
Verbena montevidensis Spreng.	0.0277778
Vernonanthura tweedieana (Baker) H.Rob.	0.0277778
Viola atropurpurea Leyb.	0.0277778
Zanthoxylum fagara (L.) Sarg.	0.0277778
Zephyranthes jamesonii (Baker) Nic.García & S.C.Arroyo	0.0277778
Dichondra microcalyx (Hallier f.) Fabris	0.0257937
Glandularia peruviana (L.) Small	0.0257937
Malvastrum coromandelianum (L.) Garcke	0.0257937
Senna pendula (Willd.) H.S.Irwin & Barneby	0.0257937
Solanum glaucophyllum Desf.	0.0257937
Solanum pseudocapsicum L.	0.0257937
Tripodanthus flagellaris (Cham. & Schltdl.) Tiegh.	0.0257937
Mikania periplocifolia Hook. & Arn.	0.0246032
Acmella decumbens (Sm.) R.K.Jansen	0.0238095
Campuloclinium macrocephalum (Less.) DC.	0.0238095
Opuntia quimilo K.Schum.	0.0238095
Solanum argentinum Bitter & Lillo	0.0238095
Verbena bonariensis L.	0.0238095
Euphorbia portulacoides L.	0.0224868
Cenchrus myosuroides Kunth	0.0218254
Elionurus muticus (Spreng.) Kuntze	0.0218254
Eugenia myrcianthes Nied.	0.0218254
Galianthe centranthoides (Cham. & Schltdl.) E.L.Cabral	0.0218254
Iresine diffusa Humb. & Bonpl. ex Willd.	0.0218254
Lantana balansae Briq.	0.0218254
Ludwigia peploides (Kunth) P.H.Raven	0.0218254
Ocimum carnosum (Spreng.) Link & Otto ex Benth	0.0218254
Opuntia elata Salm-Dyck	0.0218254
Pterogyne nitens Tul.	0.0218254
Acaena magellanica (Lam.) Vahl	0.0208333
Alstroemeria aurea Graham	0.0208333
Amomyrtus luma (Molina) D.Legrand & Kausel	0.0208333
Amsinckia calycina (Moris) Chater	0.0208333
Araucaria araucana (Molina) K.Koch	0.0208333
Archidasyphyllum diacanthoides (Less.) P.L.Ferreira, Saavedra & Groppo	0.0208333
Azara microphylla Hook.f.	0.0208333
Berberis darwinii Hook.	0.0208333
Berberis empetrifolia Lam.	0.0208333
Berberis trigona Kunze ex Poepp. & Endl.	0.0208333
Blumenbachia sylvestris Poepp.	0.0208333
Boquila trifoliolata (DC.) Decne.	0.0208333
Chiliotrichum diffusum (G.Forst.) Kuntze	0.0208333
Colletia hystrix Clos	0.0208333
Colliguaja integerrima Gillies & Hook.	0.0208333
Coriaria ruscifolia L.	0.0208333
Desfontainia spinosa Ruiz & Pav.	0.0208333
Discaria chacaye (G.Don) Tortosa	0.0208333
Escallonia virgata (Ruiz & Pav.) Pers.	0.0208333
Lathyrus magellanicus Lam.	0.0208333
Libertia chilensis (Molina) Gunckel	0.0208333
Luma apiculata (DC.) Burret	0.0208333
Maytenus chubutensis (Speg.) Lourteig, O'Donell & Sleumer	0.0208333
Mitraria coccinea Cav.	0.0208333
Mutisia decurrens Cav.	0.0208333
Nothofagus antarctica (G.Forst.) Oerst.	0.0208333
Nothofagus pumilio (Poepp. & Endl.) Krasser	0.0208333
Oenothera odorata Jacq.	0.0208333
Parablechnum cordatum (Desv.) Gasper & Salino	0.0208333
Raukaua laetevirens (Gay) Frodin	0.0208333
Ribes valdivianum Phil.	0.0208333
Sisyrinchium patagonicum Phil. ex Baker	0.0208333
Solanum nitidibaccatum Bitter	0.0208333
Solanum valdiviense Dunal	0.0208333
Valeriana lapathifolia Vahl	0.0208333
Oenothera affinis Cambess.	0.0206349
Opuntia sulphurea Gillies ex Salm-Dyck	0.0206349
Anisocapparis speciosa (Griseb.) Cornejo & H.HIltis	0.0198413
Araujia brachystephana (Griseb.) Fontella & Goyder	0.0198413
Castela coccinea Griseb.	0.0198413
Celtis chichape (Wedd.) Miq.	0.0198413
Flaveria bidentis (L.) Kuntze	0.0198413
Maytenus vitis-idaea Griseb.	0.0198413
Pectis odorata Griseb.	0.0198413
Prosopanche americana (R.Br.) Baill.	0.0198413
Salta triflora (Griseb.) Adr.Sánchez	0.0198413
Synandrospadix vermitoxicum (Griseb.) Engl.	0.0198413
Tillandsia duratii Vis.	0.0198413
Ximenia americana L.	0.0198413
Apium prostratum Vent.	0.0185185
Cheilanthes glauca (Cav.) Mett.	0.0185185
Chuquiraga avellanedae Lorentz	0.0185185
Maihueniopsis darwinii (Hensl.) F.Ritter	0.0185185
Nardophyllum bryoides (Lam.) Cabrera	0.0185185
Tetraglochin alata (Gillies ex Hook. & Arn.) Kuntze	0.0185185
Albizia inundata (Mart.) Barneby & J.W.Grimes	0.0178571
Araucaria angustifolia (Bertol.) Kuntze	0.0178571
Cayaponia podantha Cogn.	0.0178571
Cnidoscolus albomaculatus (Pax) I.M.Johnst.	0.0178571
Cyperus sesquiflorus (Torr.) Mattf. & Kük. ex Kük.	0.0178571
Dolichandra uncata (Andrews) L.G.Lohmann	0.0178571
Elionurus tripsacoides Humb. & Bonpl. ex Willd.	0.0178571
Gymnopogon spicatus (Spreng.) Kuntze	0.0178571
Hypericum brasiliense Choisy	0.0178571
Hyptis lappacea Benth.	0.0178571
Myrcianthes pungens (O.Berg) D.Legrand	0.0178571
Paspalum notatum Flüggé	0.0178571
Pfaffia tuberosa (Spreng.) Hicken	0.0178571
Pteridium esculentum (G.Forst.) Cockayne	0.0178571
Pterocaulon lorentzii Malme	0.0178571
Rhipsalis lumbricoides (Lem.) Lem. ex Salm-Dyck	0.0178571
Schizachyrium microstachyum (Desv. ex Ham.) Roseng., B.R.Arrill. & Izag.	0.0178571
Senegalia bonariensis (Gillies ex Hook. & Arn.) Seigler & Ebinger	0.0178571
Tragia volubilis L.	0.0178571
Typha domingensis Pers.	0.0178571
Artemisia copa Phil.	0.0166667
Justicia tweediana (Nees) Griseb.	0.0166667
Justicia xylosteoides Griseb.	0.0166667
Lantana aff. camara L.	0.0166667
Mutisia friesiana Cabrera	0.0166667
Parasenegalia visco (Lorentz ex Griseb.) Seigler & Ebinger	0.0166667
Perezia pungens (Humb. & Bonpl.) Less.	0.0166667
Petunia axillaris (Lam.) Britton, Stern & Poggenb.	0.0166667
Pseudognaphalium tarapacanum (Phil.) Anderb.	0.0166667
Suaeda divaricata Moq.	0.0166667
Trichocereus atacamensis (Phil.) W.T.Marshall & T.M.Bock	0.0166667
Acanthospermum hispidum DC.	0.015873
Araujia sericifera Brot.	0.015873
Cliococca selaginoides (Lam.) C.M.Rogers & Mildner	0.015873
Cyrtopodium pflanzii Schltr.	0.015873
Discaria americana Gillies & Hook.	0.015873
Lepidium auriculatum Regel & Körn.	0.015873
Porophyllum obscurum (Spreng.) DC.	0.015873
Ruellia hygrophila Mart.	0.015873
Senegalia praecox (Griseb.) Seigler & Ebinger	0.015873
Senna occidentalis (L.) Link	0.015873
Solanum aridum Morong	0.015873
Strombocarpa torquata (Cav. ex Lag.) Hutch.✤	0.015873
Actinostemon concolor (Spreng.) Müll.Arg.	0.0138889
Adenocalymma marginatum (Cham.) DC.	0.0138889
Adiantopsis dichotoma (Sw.) T.Moore	0.0138889
Andropogon lateralis Nees	0.0138889
Annona rugulosa (Schltdl.) H.Rainer	0.0138889
Argyrochosma flava (Hook.) M.Kessler & A.R.Sm.	0.0138889
Aristida oligospira (Hack.) Henrard	0.0138889
Aristolochia gibertii Hook.	0.0138889
Aristolochia trilobata L.	0.0138889
Aspidogyne kuczynskii (Porsch) Garay	0.0138889
Baccharis cf. vulneraria Baker	0.0138889
Baccharis oxyodonta DC.	0.0138889
Baccharis punctulata DC.	0.0138889
Blechnum auriculatum Cav.	0.0138889
Borreria poaya (A.St.-Hil.) DC.	0.0138889
Brasiliopuntia brasiliensis (Willd.) A.Berger	0.0138889
Buchnera longifolia Kunth	0.0138889
Calea pinnatifida (R.Br.) Less.	0.0138889
Campyloneurum nitidum (Kaulf.) C.Presl	0.0138889
Ceiba speciosa (A.St.-Hil.) Ravenna	0.0138889
Centratherum punctatum Cass.	0.0138889
Chamaecrista desvauxii (Collad.) Killip	0.0138889
Chamaecrista repens (Vogel) H.S.Irwin & Barneby	0.0138889
Cheilanthes micropteris Sw.	0.0138889
Chevreulia sarmentosa (Pers.) S.F.Blake	0.0138889
Chloroleucon tenuiflorum (Benth.) Barneby & J.W.Grimes	0.0138889
Chomelia obtusa Cham. & Schltdl.	0.0138889
Chromolaena ivifolia (L.) R.M.King & H.Rob.	0.0138889
Cissus striata Ruiz & Pav.	0.0138889
Cissus sulcicaulis (Baker) Planch.	0.0138889
Clematis bonariensis Juss. ex DC.	0.0138889
Collaea stenophylla (Hook. & Arn.) Benth.	0.0138889
Combretum fruticosum (Loefl.) Stuntz	0.0138889
Condea floribunda (Briq.) Harley & J.F.B.Pastore	0.0138889
Conyza sumatrensis (Retz.) E.Walker	0.0138889
Cordia ecalyculata Vell.	0.0138889
Cordia trichotoma (Vell.) Arráb. ex Steud.	0.0138889
Craniolaria integrifolia Cham.	0.0138889
Croton urucurana Baill.	0.0138889
Cunila microcephala Benth.	0.0138889
Cupania vernalis Cambess.	0.0138889
Cyclopogon elatus (Sw.) Schltr.	0.0138889
Cyperus luzulae (L.) Rottb. ex Retz.	0.0138889
Dalbergia frutescens (Vell.) Britton	0.0138889
Desmodium incanum DC.	0.0138889
Dicella nucifera Chodat	0.0138889
Didymopanax morototoni (Aubl.) Decne. & Planch.	0.0138889
Doryopteris concolor (Langsd. & Fisch.) Kuhn	0.0138889
Doryopteris nobilis (T.Moore) C.Chr.	0.0138889
Eleocharis bonariensis Nees	0.0138889
Eryngium pristis Cham. & Schltdl.	0.0138889
Euphorbia sciadophila Boiss.	0.0138889
Galianthe brasiliensis (Spreng.) E.L.Cabral & Bacigalupo	0.0138889
Gamochaeta filaginea (DC.) Cabrera	0.0138889
Geophila repens (L.) I.M.Johnst.	0.0138889
Goniopteris riograndensis (Lindm.) Ching	0.0138889
Guadua trinii (Nees) Nees ex Rupr.	0.0138889
Guarea guidonia (L.) Sleumer	0.0138889
Heliotropium phylicoides Cham.	0.0138889
Heliotropium transalpinum Vell.	0.0138889
Heteropterys intermedia (A.Juss.) Griseb.	0.0138889
Hydrocotyle callicephala Cham.	0.0138889
Hydrocotyle exigua (Urb.) Malme	0.0138889
Jacaranda puberula Cham.	0.0138889
Justicia brasiliana Roth	0.0138889
Justicia comata (L.) Lam.	0.0138889
Lepidaploa balansae (Hieron.) H.Rob.	0.0138889
Lippia brasiliensis (Link) T.Silva	0.0138889
Lippia lupulina Cham.	0.0138889
Lobelia hassleri Zahlbr.	0.0138889
Ludwigia elegans (Cambess.) H.Hara	0.0138889
Lycium boerhaviaefolium L.f.	0.0138889
Machaerium paraguariense Hassl.	0.0138889
Machaerium stipitatum (DC.) Vogel	0.0138889
Macropharynx peltata (Vell.) J.F.Morales, M.E.Endress & Liede	0.0138889
Macropsychanthus violaceus (Mart. ex Benth.) L.P.Queiroz & Snak	0.0138889
Manettia luteo-rubra (Vell.) Benth.	0.0138889
Melochia pilosa (Mill.) Fawc. & Rendle	0.0138889
Melothria cucumis Vell.	0.0138889
Mikania glomerata Spreng.	0.0138889
Mikania micrantha Kunth	0.0138889
Miltonia flavescens Lindl.	0.0138889
Myrcia palustris DC.	0.0138889
Myrciaria delicatula (DC.) O.Berg	0.0138889
Ocimum nudicaule Benth.	0.0138889
Ocotea diospyrifolia (Meisn.) Mez	0.0138889
Opuntia aff. stenarthra K.Schum.	0.0138889
Osmunda spectabilis Willd.	0.0138889
Oxalis conorrhiza Jacq.	0.0138889
Oxypetalum brachystemma Malme	0.0138889
Passiflora alata Curtis	0.0138889
Pavonia subrotunda A.St.-Hil. & Naudin	0.0138889
Peperomia circinnata Link	0.0138889
Piper amalago L.	0.0138889
Pistia stratiotes L.	0.0138889
Pleopeltis minima (Bory) J.Prado & R.Y.Hirai	0.0138889
Pleopeltis pleopeltifolia (Raddi) Alston	0.0138889
Poikilacanthus glandulosus (Nees) Ariza	0.0138889
Portulaca cryptopetala Speg.	0.0138889
Pristimera celastroides (Kunth) A.C.Sm.	0.0138889
Prunus subcoriacea (Chodat & Hassl.) Koehne	0.0138889
Psidium australe Cambess.	0.0138889
Psychotria leiocarpa Cham. & Schltdl.	0.0138889
Pyrostegia venusta (Ker Gawl.) Miers	0.0138889
Roupala montana Aubl.	0.0138889
Rubus sellowii Cham. & Schltdl.	0.0138889
Schinus lentiscifolia Marchand	0.0138889
Schinus weinmannifolia Engl.	0.0138889
Seguieria americana L.	0.0138889
Senegalia recurva (Benth.) Seigler & Ebinger	0.0138889
Setaria sulcata Raddi	0.0138889
Sida santaremensis Monteiro	0.0138889
Sida urens L.	0.0138889
Solanum atropurpureum Schrank	0.0138889
Solanum chenopodioides Lam.	0.0138889
Solanum paniculatum L.	0.0138889
Stenachaenium riedelii Baker	0.0138889
Thaumatophyllum bipinnatifidum (Schott ex Endl.) Sakur., Calazans & Mayo	0.0138889
Thinouia mucronata Radlk.	0.0138889
Tillandsia aëranthos (Loisel.) L.B.Sm.	0.0138889
Tradescantia fluminensis Vell.	0.0138889
Tragia polyandra Vell.	0.0138889
Trema micrantha (L.) Blume	0.0138889
Trichilia catigua A.Juss.	0.0138889
Wilbrandia ebracteata Cogn.	0.0138889
Xylopia brasiliensis Spreng.	0.0138889
Xylosma tweediana (Clos) Eichler	0.0138889
Zanthoxylum caribaeum Lam.	0.0138889
Zephyranthes candida (Herb. ex Lindl.) Herb.	0.0138889
Azolla filiculoides Lam.	0.0132275
Acanthosyris falcata Griseb.	0.0119048
Aspidosperma triternatum Rojas Acosta	0.0119048
Baccharis artemisioides Hook. & Arn.	0.0119048
Baccharis genistifolia DC.	0.0119048
Bauhinia argentinensis Burkart	0.0119048
Cardiospermum halicacabum L.	0.0119048
Cayaponia citrullifolia (Griseb.) Cogn. ex Griseb.	0.0119048
Cereus forbesii Otto ex C.F.Först.	0.0119048
Commelina diffusa Burm.f.	0.0119048
Daucus pusillus Michx.	0.0119048
Dysphania retusa (Juss. ex Moq.) Mosyakin & Clemants	0.0119048
Eryngium elegans Cham. & Schltdl.	0.0119048
Facelis retusa (Lam.) Sch.Bip.	0.0119048
Funastrum gracile (Decne.) Schltr.	0.0119048
Hypochaeris pampasica Cabrera	0.0119048
Jaborosa integrifolia Lam.	0.0119048
Janusia guaranitica (A.St.-Hil.) A.Juss.	0.0119048
Juncus dichotomus Elliot	0.0119048
Lycium ciliatum Schltdl.	0.0119048
Nama undulatum Kunth	0.0119048
Oenothera indecora Cambess.	0.0119048
Oenothera parodiana Munz	0.0119048
Opuntia bonaerensis Speg.✤	0.0119048
Oxypetalum solanoides Hook. & Arn.	0.0119048
Pluchea microcephala R.K.Godfrey	0.0119048
Polygonum brasiliense K.Koch	0.0119048
Portulaca papulosa Schltdl.	0.0119048
Quiabentia verticillata (Vaupel) Borg	0.0119048
Rhynchosia senna Gillies ex Hook.	0.0119048
Rumex obovatus Danser	0.0119048
Sarcotoxicum salicifolium (Griseb.) Cornejo & H.H.Iltis	0.0119048
Sesbania virgata (Cav.) Pers.	0.0119048
Solanum hieronymi Kuntze	0.0119048
Spergula ramosa (Cambess.) D.Dietr.	0.0119048
Vachellia albicorticata (Burkart) Seigler & Ebinger	0.0119048
Verbena gracilescens (Cham.) Herter	0.0119048
Verbena rigida Spreng.	0.0119048
Acaena platyacantha Speg.	0.00925926
Acaena sericea J.Jacq.	0.00925926
Adiantum chilense Kaulf.	0.00925926
Alstroemeria patagonica Phil.	0.00925926
Azorella trifurcata (Gaertn.) Pers.	0.00925926
Baccharis patagonica Hook. & Arn.	0.00925926
Blumenbachia dissecta (Hook. & Arn.) Weigend & J.Grau	0.00925926
Bolax gummifera (Lam.) Spreng.	0.00925926
Calceolaria filicaulis Clos	0.00925926
Calceolaria uniflora Lam.	0.00925926
Callitriche lechleri (Hegelm.) Fassett	0.00925926
Colobanthus cf. lycopodioides Griseb.	0.00925926
Corynabutilon bicolor (Phil. ex K.Schum.) Kearney	0.00925926
Galium eriocarpum Bartl. ex DC.	0.00925926
Gamocarpha selliana Reiche	0.00925926
Gunnera magellanica Lam.	0.00925926
Haplopappus glutinosus Cass.	0.00925926
Hypochaeris incana (Hook. & Arn.) Macloskie	0.00925926
Juncus balticus Willd.	0.00925926
Larrea ameghinoi Speg.	0.00925926
Lecanophora ameghinoi (Speg.) Speg.	0.00925926
Luzula brachyphylla Phil.	0.00925926
Maihuenia patagonica (Phil.) Britton & Rose	0.00925926
Mutisia oligodon Poepp. & Endl.	0.00925926
Mutisia retrorsa Cav.	0.00925926
Nassauvia glomerulosa (Lag. ex Lindl.) D.Don	0.00925926
Neltuma alpataco (Phil.) C.E.Hughes & G.P.Lewis	0.00925926
Neltuma denudans (Benth.) C.E.Hughes & G.P.Lewis✤	0.00925926
Oxalis nahuelhuapiensis Speg.	0.00925926
Pappostipa ibarii (Phil.) Romasch.	0.00925926
Prosopidastrum globosum (Gillies ex Hook. & Arn.) Burkart	0.00925926
Pseudognaphalium cymatoides (Kunze ex DC.) Anderb.	0.00925926
Pseudognaphalium viravira (Molina) Anderb.	0.00925926
Retanilla patagonica (Speg.) Tortosa	0.00925926
Sanicula graveolens Poepp. ex DC.	0.00925926
Schinus roigii Ruiz Leal & Cabrera	0.00925926
Senecio neaei DC.	0.00925926
Senecio trifurcatus (G.Forst.) Less.	0.00925926
Sisyrinchium arenarium Poepp.	0.00925926
Tristagma patagonicum (Baker) Traub	0.00925926
Tropaeolum incisum (Speg.) Sparre	0.00925926
Valeriana clarionifolia Phil.	0.00925926
Zephyranthes elwesii (C.H.Wright) Nic.García✤	0.00925926
Acalypha communis Müll.Arg.	0.00793651
Amphilophium carolinae (Lindl.) L.G.Lohmann	0.00793651
Argyrochosma nivea (Poir.) Windham	0.00793651
Asclepias mellodora A.St.-Hil.	0.00793651
Atriplex undulata (Moq.) D.Dietr.	0.00793651
Cardiospermum corindum L.	0.00793651
Ceiba chodatii (Hassl.) Ravenna	0.00793651
Cheilanthes obducta Mett. ex Kuhn	0.00793651
Chromolaena christieana (Baker) R.M.King & H.Rob.	0.00793651
Cissus palmata Poir.	0.00793651
Cleistocactus baumannii (Lem.) Lem.	0.00793651
Croton hieronymi Griseb.	0.00793651
Croton parvifolius Müll.Arg.	0.00793651
Denisophytum stuckertii (Hassl.) E.Gagnon & G.P.Lewis	0.00793651
Desmanthus virgatus (L.) Willd.	0.00793651
Erythrina mulungu Mart.	0.00793651
Euphorbia selloi (Klotzsch & Garcke) Boiss.	0.00793651
Flourensia thurifera (Molina) DC.	0.00793651
Glandularia tweedieana (Niven ex Hook.) P.Peralta	0.00793651
Heliotropium elongatum Hoffm. ex Roem. & Schult.	0.00793651
Jatropha hieronymi Kuntze	0.00793651
Lepidium bonariense L.	0.00793651
Mimosa detinens Benth.	0.00793651
Mitracarpus megapotamicus (Spreng.) Kuntze	0.00793651
Monvillea spegazzinii (F.A.C.Weber) Britton & Rose	0.00793651
Neltuma elata (Burkart) C.E.Hughes & G.P.Lewis	0.00793651
Phyla nodiflora (L.) Greene	0.00793651
Pisonia zapallo Griseb.	0.00793651
Polygonum hydropiperoides Michx.	0.00793651
Psidium salutare (Humb., Bonpl. & Kunth) O.Berg	0.00793651
Pterocaulon virgatum (L.) DC.	0.00793651
Rhynchosia diversifolia Micheli	0.00793651
Senegalia gilliesii (Steud.) Seigler & Ebinger	0.00793651
Stetsonia coryne (Salm-Dyck) Britton & Rose	0.00793651
Tessaria integrifolia Ruiz & Pav.	0.00793651
Tillandsia meridionalis Baker	0.00793651
Tillandsia streptocarpa Baker	0.00793651
Urtica spatulata Sm.	0.00793651
Urvillea chacoensis Hunz.	0.00793651
Adiantum orbignyanum Mett. ex Kuhn	0.00396825
Agalinis genistifolia (Cham. & Schltdl.) D'Arcy	0.00396825
Aldama anchusifolia (DC.) E.E.Schill. & Panero	0.00396825
Aloysia decipiens Ravenna	0.00396825
Amaranthus standleyanus Parodi ex Covas	0.00396825
Anemone decapetala Ard.	0.00396825
Araujia stuckertiana (Kurtz ex Heger) Fontella & Goyder	0.00396825
Araujia variegata (Griseb.) Fontella & Goyder	0.00396825
Arenaria lanuginosa (Michx.) Rohrb.	0.00396825
Aristida mendocina Phil.	0.00396825
Aristolochia elegans Mast.	0.00396825
Aristolochia fimbriata Cham.	0.00396825
Aristolochia stuckertii Speg.	0.00396825
Asclepias barjoniifolia E.Fourn.	0.00396825
Aspicarpa sericea Griseb.	0.00396825
Aspilia aff. pascalioides Griseb.	0.00396825
Augustea suffruticosa (Griseb.) Iamonico	0.00396825
Baccharis albida Hook. & Arn.	0.00396825
Baccharis notosergila Griseb.	0.00396825
Bromelia hieronymi Mez	0.00396825
Bromelia serra Griseb.	0.00396825
Bulbostylis capillaris (L.) C.B.Clarke	0.00396825
Byttneria filipes Mart. ex K.Schum.	0.00396825
Callianthe pauciflora (A.St.-Hil.) Dorr	0.00396825
Canna glauca L.	0.00396825
Cardionema ramosissima (Weinm.) A.Nelson & J.F.Macbr.	0.00396825
Cenchrus longispinus (Hack.) Fernald	0.00396825
Cestrum strigilatum Ruiz & Pav.	0.00396825
Chaptalia sinuata (Less.) Baker	0.00396825
Chromolaena hirsuta (Hook. & Arn.) R.M.King & H.Rob.	0.00396825
Cienfuegosia drummondii (A.Gray) Lewton	0.00396825
Cissus tweediana (Baker) Griseb.	0.00396825
Clematis campestris A.St.-Hil.	0.00396825
Clinopodium odorum (Griseb.) Harley	0.00396825
Condalia montana A.Cast.	0.00396825
Conyza glandulitecta Cabrera	0.00396825
Corchorus hirtus L.	0.00396825
Crotalaria incana L.	0.00396825
Croton glandulosus L.	0.00396825
Croton lanatus Lam.	0.00396825
Cucurbitella asperata (Gillies ex Hook. & Arn.) Walp.	0.00396825
Cynanchum montevidense Spreng.	0.00396825
Cynophalla retusa (Griseb.) Cornejo & H.H.Iltis	0.00396825
Dactylaena pauciflora Griseb.	0.00396825
Deinacanthon urbanianum (Mez) Mez	0.00396825
Dioscorea microbotrya Griseb.	0.00396825
Diplokeleba floribunda N.E.Br.	0.00396825
Echinopsis rhodotricha K.Schum.	0.00396825
Elephantopus mollis Kunth	0.00396825
Ephedra tweediana Fisch. & C.A.Mey. emend. J.H.Hunz.	0.00396825
Eryngium sanguisorba Cham. & Schltdl.	0.00396825
Erythranthe glabrata (Kunth) G.L.Nesom	0.00396825
Euphorbia lasiocarpa Klotzsch	0.00396825
Euploca procumbens (Mill.) Diane & Hilger	0.00396825
Funastrum clausum (Jacq.) Schltr.	0.00396825
Gamochaeta americana (Mill.) Wedd.	0.00396825
Gamochaeta pensylvanica (Willd.) Cabrera	0.00396825
Gentianella parviflora (Griseb.) T.N.Ho	0.00396825
Glandularia aristigera (S.Moore) Tronc.	0.00396825
Glandularia dissecta (Willd. ex Spreng.) Schnack & Covas	0.00396825
Glandularia platensis (Spreng.) Schnack & Covas	0.00396825
Gomphrena perennis L.	0.00396825
Gomphrena pulchella Mart.	0.00396825
Gonolobus rostratus (Vahl) Roem. & Schult.	0.00396825
Gonopterodendron bonariensis (Griseb.) A.C.Godoy-Bürki	0.00396825
Grindelia pulchella Dunal	0.00396825
Guadua chacoensis (Rojas) Londoño & P.M.Peterson	0.00396825
Gymnocalycium mihanovichii (Fric ex Gürke) Britton & Rose	0.00396825
Gyptis artemisifolia (Griseb.) R.M.King & H.Rob.	0.00396825
Handroanthus chrysotrichus (Mart. ex A.DC.) Mattos	0.00396825
Harrisia bonplandii (Pfeiff.) Britton & Rose	0.00396825
Harrisia pomanensis (F.A.C.Weber ex K.Schum.) Britton & Rose	0.00396825
Heterosperma tenuisectum (Griseb.) Cabrera	0.00396825
Hochreutinera hasslerana (Hochr.) Krapov.	0.00396825
Hydrocotyle ranunculoides L.f.	0.00396825
Hymenoxys anthemoides (Juss.) Cass.	0.00396825
Ibicella parodii Abbiatti	0.00396825
Ipomoea cheirophylla O'Donell	0.00396825
Ipomoea hieronymi (Kuntze) O'Donell	0.00396825
Ipomoea purpurea (L.) Roth	0.00396825
Jatropha isabelliae Müll.Arg.	0.00396825
Kageneckia lanceolata Ruiz & Pav.	0.00396825
Lantana fucata Lindl.	0.00396825
Lantana grisebachii Stuck. ex Seckt	0.00396825
Lantana megapotamica (Spreng.) Tronc.	0.00396825
Lessingianthus mollissimus (D.Don ex Hook. & Arn.) H.Rob.	0.00396825
Limnobium laevigatum (Humb. & Bonpl. ex Willd.) Heine	0.00396825
Lippia junelliana (Moldenke) Tronc.	0.00396825
Lophocarpinia aculeatifolia (Burkart) Burkart	0.00396825
Ludwigia octovalvis (Jacq.) P.H.Raven	0.00396825
Lycium elongatum Miers	0.00396825
Lycium nodosum Miers	0.00396825
Lycopodium clavatum L.	0.00396825
Macroptilium bracteatum (Nees & C.Mart.) Maréchal & Baudet	0.00396825
Mandevilla angustifolia (Malme) Woodson	0.00396825
Manihot guaranitica Chodat & Hassl.	0.00396825
Mascagnia brevifolia Griseb.	0.00396825
Mimosa strigillosa Torr. & A.Gray	0.00396825
Mimozyganthus carinatus (Griseb.) Burkart	0.00396825
Moquiniastrum argentinum (Cabrera) G.Sancho	0.00396825
Myriopteris notholaenoides (Desv.) Grusz & Windham	0.00396825
Neltuma × vinalillo (Stuck.) C.E.Hughes & G.P.Lewis	0.00396825
Nicotiana paa Mart.Crov.	0.00396825
Nymphoides indica (L.) Kuntze	0.00396825
Ocimum campechianum Mill.	0.00396825
Ophryosporus axilliflorus (Griseb.) Hieron.	0.00396825
Otholobium higuerilla (Gillies ex Hook.) J.W.Grimes	0.00396825
Passiflora foetida L.	0.00396825
Passiflora palmatisecta Mast.	0.00396825
Peperomia comarapana C.DC.	0.00396825
Perezia multiflora (Humb. & Bonpl.) Less.	0.00396825
Picrosia longifolia D.Don	0.00396825
Polygonum hispidum Kunth	0.00396825
Pombalia parviflora (Mutis ex L.f.) Paula-Souza	0.00396825
Pombalia serrata (Phil.) Paula-Souza✤	0.00396825
Porophyllum linifolium (Ard.) DC.	0.00396825
Proustia cuneifolia D.Don	0.00396825
Pseudabutilon virgatum (Cav.) Fryxell	0.00396825
Pseudognaphalium cheiranthifolium (Lam.) Hilliard & B.L.Burtt	0.00396825
Pterocaulon cordobense Kuntze	0.00396825
Pterocaulon purpurascens Malme	0.00396825
Rhynchosia bicentrica B.L.Turner	0.00396825
Rhynchosia minima (L.) DC.	0.00396825
Rivina humilis L.	0.00396825
Rumex cuneifolius Campd.	0.00396825
Salicornia sp.	0.00396825
Salvia cardiophylla Benth.	0.00396825
Samolus valerandi L.	0.00396825
Schinus bumelioides I.M.Johnst.	0.00396825
Scoparia nudicaulis Chodat	0.00396825
Scutia buxifolia Reissek	0.00396825
Senecio pampeanus Cabrera	0.00396825
Senna chloroclada (Harms) H.S.Irwin & Barneby	0.00396825
Senna hirsuta (L.) H.S.Irwin & Barneby	0.00396825
Senna obtusifolia (L.) H.S.Irwin & Barneby	0.00396825
Sida spinosa L.	0.00396825
Sisyrinchium chilense Hook.	0.00396825
Solanum bonariense L.	0.00396825
Solanum chacoense Bitter	0.00396825
Solanum commersonii Dunal ex Poir.	0.00396825
Solanum elaeagnifolium Cav.	0.00396825
Solanum palinacanthum Dunal	0.00396825
Solidago microglossa DC.	0.00396825
Sorghastrum pellitum (Hack.) Parodi	0.00396825
Sporobolus cf. spartinus (Trin.) P.M.Peterson & Saarela	0.00396825
Staelia virgata (Link ex Roem. & Schult.) K.Schum.	0.00396825
Tagetes argentina Cabrera	0.00396825
Tarenaya tucumanensis (H.H.Iltis) Arana & Oggero	0.00396825
Teucrium cubense Jacq.	0.00396825
Thalictrum decipiens Boivin	0.00396825
Tillandsia funebris A.Cast.	0.00396825
Tillandsia loliacea Mart. ex Schult.f.	0.00396825
Tillandsia recurvifolia Hook.	0.00396825
Tragia geraniifolia Klotzsch ex Baill.	0.00396825
Tragia hieronymii Pax & K.Hoffm.	0.00396825
Trichocereus terscheckii (J.Parm. ex Pfeiff.) Britton & Rose	0.00396825
Trichocline plicata D.Don ex Hook. & Arn.	0.00396825
Trichocline sinuata (D.Don) Cabrera	0.00396825
Urolepis hecatantha (DC.) R.M.King & H.Rob.	0.00396825
Urtica gracilis Aiton	0.00396825
Valeriana polybotrya (Griseb.) Höck	0.00396825
Varronia curassavica Jacq.	0.00396825
Xanthium ambrosioides Hook. & Arn.	0.00396825
Zephyranthes saltensis (Ravenna) S.C.Arroyo	0.00396825
Zinnia peruviana (L.) L.	0.00396825
Abutilon terminale (Cav.) A.St.-Hil.	*
Acicarpha tribuloides Juss.	*
Agalinis communis (Cham. & Schltdl.) D'Arcy	*
Aloysia virgata (Ruiz & Pav.) Pers.	*
Alternanthera paronychioides A.St.-Hil.	*
Andropogon bicornis L.	*
Androtrichum giganteum (Kunth) H.Pfeiff.	*
Anoda cristata (L.) Schltdl.	*
Anthurium paraguayense Engl.	*
Araujia angustifolia (Hook. & Arn.) Steud.	*
Aristolochia angustifolia Cham.	*
Aristolochia prostrata Duch.	*
Austroeupatorium inulifolium (Kunth) R.M.King & H.Rob.	*
Axonopus compressus (Sw.) P.Beauv.	*
Baccharis microcephala (Less.) DC.	*
Brachystele camporum (Lindl.) Schltr.	*
Butia paraguayensis (Barb.Rodr.) L.H.Bailey	*
Butia yatay (Mart.) Becc.	*
Caiophora chuquitensis (Meyen) Urb. & Gilg	*
Calceolaria schickendantziana Kraenzl.	*
Capsicum baccatum L.	*
Castela tweedii Planch.	*
Catasetum fimbriatum (C.Morren) Lindl. & Paxton	*
Celtis spinosa Spreng.	*
Cenchrus spinifex Cav.	*
Cephalanthus glabratus (Spreng.) K.Schum.	*
Cereus argentinensis Britton & Rose✤	*
Chromolaena arnottiana (Griseb.) R.M.King & H.Rob.	*
Chromolaena laevigata (Lam.) R.M.King & H.Rob.	*
Chrysophyllum marginatum (Hook. & Arn.) Radlk.	*
Cienfuegosia sulphurea (A.St.-Hil.) Garcke	*
Cnidoscolus loasoides (Pax) I.M.Johnst.	*
Commelina platyphylla Klotzsch ex Seub.	*
Commelina tuberosa L.	*
Copernicia alba Morong	*
Cosmos peucedanifolius Wedd.	*
Crotalaria micans Link	*
Cuphea lysimachioides Cham. & Schltdl.	*
Cuscuta obtusiflora Kunth	*
Cuscuta platyloba Progel	*
Cybistax antisyphilitica (Mart.) Mart.	*
Cyperus giganteus Vahl	*
Cyrtopodium palmifrons Rchb.f. & Warm.	*
Dorstenia brasiliensis Lam.	*
Drymaria glandulosa Bartl.	*
Dysphania chilensis (Schrad.) Mosyakin & Clemants	*
Eryngium echinatum Urb.	*
Eryngium nudicaule Lam.	*
Eugenia pitanga (O.Berg) Kiaersk.	*
Euphorbia papillosa A.St.-Hil.	*
Euphorbia prostrata Aiton	*
Galianthe eupatorioides (Cham. & Schltdl.) E.L.Cabral	*
Gamochaeta calviceps (Fernald) Cabrera	*
Gomphrena boliviana Moq.	*
Grandiphyllum pulvinatum (Lindl.) Docha Neto	*
Gutierrezia mandonii (Sch.Bip.) Solbrig	*
Heterosperma ovatifolium Cav.	*
Hypochaeris microcephala (Sch.Bip.) Cabrera	*
Jatropha pedersenii Lourteig	*
Junellia hookeriana (Covas & Schnack) N.O'Leary & P.Peralta	*
Lupinus paraguariensis Chodat & Hassl.	*
Mandevilla petraea (A.St.-Hil.) Pichon	*
Melicoccus lepidopetalus Radlk.	*
Mikania cordifolia (L.f.) Willd.	*
Mimosa balansae Micheli	*
Misodendrum punctulatum DC.	*
Monvillea cavendischii (Monv.) Britton & Rose	*
Mutisia acuminata Ruiz & Pav.	*
Neltuma affinis (Spreng.) C.E.Hughes & G.P.Lewis	*
Neltuma caldenia (Burkart) C.E.Hughes & G.P.Lewis✤	*
Nierembergia linariaefolia Graham	*
Ocimum ovatum Benth.	*
Oenothera mollissima L.	*
Oxalis triangularis A.St.-Hil.	*
Paspalum distichum L.	*
Passiflora misera Kunth	*
Passiflora suberosa L.	*
Pavonia argentina Gürke	*
Peperomia aceroana C.DC.	*
Phoradendron argentinum Urb.	*
Pterocaulon angustifolium DC.	*
Pterocaulon polystachyum DC.	*
Pterocaulon rugosum (Vahl) Malme	*
Pycnophyllum bryoides (Phil.) Rohrb.	*
Ranunculus bonariensis Poir.	*
Rumex paraguayensis D.Parodi	*
Sapindus saponaria L.	*
Schinopsis balansae Engl.	*
Schizachyrium condensatum (Kunth) Nees	*
Sisyrinchium pachyrhizum Baker	*
Sisyrinchium vaginatum Spreng.	*
Solanum pilcomayense Morong	*
Stachys gilliesii Benth.	*
Symphyotrichum squamatum (Spreng.) G.L.Nesom	*
Thaumatophyllum tweedieanum (Schott ex Endl.) Sakur., Calazans & Mayo	*
Tillandsia capillaris Ruiz & Pav.	*
Tillandsia pedicellata (Mez) A.Cast.	*
Tillandsia recurvata (L.) L.	*
Trichocentrum pumilum (Lindl.) M.W.Chase & N.H.Williams	*
Trichocline auriculata (Wedd.) Hieron.	*
Trifolium polymorphum Poir.	*
Tripogandra glandulosa (Seub.) Rohweder	*
Trixis pallida Less.	*
Typha subulata Crespo & R.L.Pérez-Mor.	*
Urera aurantiaca Wedd.	*
Urvillea pterocarpa (Radlk.) Acev.-Rodr. & Ferrucci	*
Vernonanthura chamaedrys (Less.) H.Rob.	*
Victoria cruziana Orb.	*
Xylosma venosa N.E.Br.	*
* For calculate weighted RFC we excluded articles where the use of plants was reported for more than one province without distinction between them. However, we included all medicinal species at the end of the table.

## Sheet: Table S6
Supplementary Table S6
Weighted Relative Frequency of Citation (RFC) of food species in Argentina
Food species	RFC_ARG
Berberis microphylla G.Forst.	0.25
Arjona tuberosa Cav.	0.229167
Ephedra ochreata Miers	0.229167
Solanum sisymbriifolium Lam.	0.215278
Erythranthe glabrata (Kunth) G.L.Nesom	0.208333
Gunnera tinctoria (Molina) Mirb.	0.208333
Celtis iguanaea (Jacq.) Sarg.	0.194444
Araucaria araucana (Molina) K.Koch	0.1875
Ilex paraguariensis A.St.-Hil.	0.1875
Eugenia uniflora L.	0.180556
Allophylus edulis (A.St.-Hil., A.Juss. & Cambess.) Hieron. ex Niederl.	0.166667
Apium australe Thouars	0.166667
Aristotelia chilensis (Molina) Stuntz	0.166667
Berberis darwinii Hook.	0.166667
Psidium guajava L.	0.166667
Canna indica L.	0.159722
Cucurbita maxima Duchesne	0.159722
Chrysophyllum gonocarpum (Mart. & Eichler) Engl.	0.152778
Myrcianthes pungens (O.Berg) D.Legrand	0.152778
Salpichroa origanifolia (Lam.) Baill.	0.152778
Diposis patagonica Skottsb.✤	0.145833
Fragaria chiloensis (L.) Mill.	0.145833
Maihueniopsis darwinii (Hensl.) F.Ritter	0.145833
Ribes magellanicum Poir.	0.145833
Vasconcellea quercifolia A.St.-Hil.	0.145833
Geoffroea decorticans (Gillies ex Hook. & Arn.) Burkart	0.145833
Aechmea distichantha Lem.	0.125
Chusquea culeou E.Desv.	0.125
Condalia microphylla Cav.✤	0.125
Passiflora caerulea L.	0.125
Solanum betaceum Cav.	0.125
Physalis viscosa L.	0.118056
Vassobia breviflora (Sendtn.) Hunz.	0.118056
Sarcomphalus mistol (Griseb.) Hauenschild	0.111111
Alstroemeria patagonica Phil.	0.104167
Azorella monantha Clos	0.104167
Celtis group (Celtis tala Gillies ex Planch. + Celtis pallida Torr.)	0.104167
Chenopodium quinoa Willd.	0.104167
Empetrum rubrum Vahl ex Willd.	0.104167
Muehlenbeckia hastulata (Sm.) I.M.Johnst.	0.104167
Oxalis adenophylla Gillies ex Hook. & Arn.	0.104167
Annona rugulosa (Schltdl.) H.Rainer	0.0972222
Neltuma alba (Griseb.) C.E.Hughes & G.P.Lewis	0.0972222
Amomyrtella güili (Speg.) Kausel	0.0833333
Araujia odorata (Hook. & Arn.) Fontella & Goyder	0.0833333
Bidens andicola Kunth	0.0833333
Chaptalia nutans (L.) Pol.	0.0833333
Chromolaena hookeriana (Griseb.) R.M.King & H.Rob.	0.0833333
Clinopodium gilliesii (Benth.) Kuntze	0.0833333
Duranta serratifolia (Griseb.) Kuntze	0.0833333
Dysphania mandonii (S.Watson) Mosyakin & Clemants	0.0833333
Ephedra cf. americana Humb. & Bonpl. ex Willd.	0.0833333
Ephedra triandra Tul. emend. J.H.Hunz.	0.0833333
Gunnera apiculata Schindl.	0.0833333
Ipomoea plummerae A.Gray	0.0833333
Juglans australis Griseb.	0.0833333
Myrcianthes mato (Griseb.) McVaugh	0.0833333
Neltuma denudans (Benth.) C.E.Hughes & G.P.Lewis✤	0.0833333
Neltuma nigra (Griseb.) C.E.Hughes & G.P.Lewis	0.0833333
Oxalis tuberosa Molina	0.0833333
Pachyrhizus ahipa (Wedd.) Parodi	0.0833333
Philibertia parviflora (Malme) Goyder	0.0833333
Plinia peruviana (Poir.) Govaerts	0.0833333
Podocarpus parlatorei Pilg.	0.0833333
Poissonia heterantha (Griseb.) Lavin	0.0833333
Ribes cucullatum Hook. & Arn.	0.0833333
Rubus imperialis Cham. & Schltdl.	0.0833333
Salvia cuspidata Ruiz & Pav.	0.0833333
Syagrus romanzoffiana (Cham.) Glassman	0.0833333
Thaumatophyllum bipinnatifidum (Schott ex Endl.) Sakur., Calazans & Mayo	0.0833333
Tristagma patagonicum (Baker) Traub	0.0833333
Ullucus tuberosus Caldas	0.0833333
Vernonanthura squamulosa (Hook. & Arn.) H.Rob.	0.0833333
Ximenia americana L.	0.0833333
Zephyranthes elwesii (C.H.Wright) Nic.García✤	0.0833333
Opuntia sulphurea Gillies ex Salm-Dyck	0.0763889
Acrocomia aculeata (Jacq.) Lodd. ex Mart.	0.0694444
Campomanesia xanthocarpa O.Berg	0.0694444
Plinia rivularis (Cambess.) Rotman	0.0694444
Muehlenbeckia sagittifolia (Ortega) Meisn.	0.0694444
Annona emarginata (Schltdl.) H.Rainer	0.0625
Berberis empetrifolia Lam.	0.0625
Blumenbachia dissecta (Hook. & Arn.) Weigend & J.Grau	0.0625
Cleistocactus baumannii (Lem.) Lem.	0.0625
Luma apiculata (DC.) Burret	0.0625
Potentilla chiloensis (L.) Mabb.	0.0625
Schinus odonellii F.A.Barkley	0.0625
Allophylus guaraniticus (A.St.-Hil.) Radlk.	0.0555556
Bromelia balansae Mez	0.0555556
Campomanesia guazumifolia (Cambess.) O.Berg	0.0555556
Dicella nucifera Chodat	0.0555556
Eugenia involucrata DC.	0.0555556
Eugenia myrcianthes Nied.	0.0555556
Eugenia pyriformis Cambess.	0.0555556
Hypochaeris chillensis (Kunth) Hieron.	0.0555556
Neltuma flexuosa (DC.) C.E.Hughes & G.P.Lewis	0.0555556
Pouteria gardneriana (A.DC.) Radlk.	0.0555556
Cereus forbesii Otto ex C.F.Först.	0.0486111
Dysphania ambrosioides (L.) Mosyakin & Clemants	0.0486111
Maclura tinctoria (L.) Steud.	0.0486111
Schinus group (Schinus areira L. + Schinus molle L.)	0.0486111
Acanthosyris falcata Griseb.	0.0486111
Araujia brachystephana (Griseb.) Fontella & Goyder	0.0486111
Bromelia serra Griseb.	0.0486111
Copernicia alba Morong	0.0486111
Cynophalla retusa (Griseb.) Cornejo & H.H.Iltis	0.0486111
Opuntia anacantha Speg.	0.0486111
Sideroxylon obtusifolium (Roem. & Schult.) T.D.Penn.	0.0486111
Acca sellowiana (O.Berg) Burret	0.0416667
Amomyrtus luma (Molina) D.Legrand & Kausel	0.0416667
Apium panul (Bertero ex DC.) Reiche	0.0416667
Araucaria angustifolia (Bertol.) Kuntze	0.0416667
Araujia sericifera Brot.	0.0416667
Balbisia gracilis (Meyen) Hunz. & Ariza	0.0416667
Blepharocalyx salicifolius (Kunth) O.Berg	0.0416667
Bromus catharticus Vahl	0.0416667
Cereus stenogonus K.Schum.	0.0416667
Cereus uruguayanus R.Kiesling	0.0416667
Commelina erecta L.	0.0416667
Eryngium paniculatum Cav. & Dombey ex F.Delaroche	0.0416667
Fabiana imbricata Ruiz & Pav.	0.0416667
Grindelia chiloensis (Cornel.) Cabrera	0.0416667
Inga uraguensis Hook. & Arn.	0.0416667
Jacaratia spinosa (Aubl.) A.DC.	0.0416667
Lathyrus magellanicus Lam.	0.0416667
Lycium chilense Miers ex Bertero	0.0416667
Margyricarpus pinnatus (Lam.) Kuntze	0.0416667
Maytenus boaria Molina	0.0416667
Neltuma alpataco (Phil.) C.E.Hughes & G.P.Lewis	0.0416667
Opuntia bonaerensis Speg.✤	0.0416667
Oxalis valdiviensis Barnéoud	0.0416667
Pontederia azurea Sw.	0.0416667
Pontederia crassipes Mart.	0.0416667
Pseudananas sagenarius (Arruda) Camargo	0.0416667
Pyrrhocactus strausianus (K.Schum.) A.Berger✤	0.0416667
Rhipsalis lumbricoides (Lem.) Lem. ex Salm-Dyck	0.0416667
Rivina humilis L.	0.0416667
Salicornia sp.	0.0416667
Solanum chenopodioides Lam.	0.0416667
Sorocea bonplandii (Baill.) W.C.Burger, Lanj. & Wess.Boer	0.0416667
Thalia geniculata L.	0.0416667
Tropaeolum porifolium (Cav.) L.Andersson & S.Andersson	0.0416667
Ugni molinae Turcz.	0.0416667
Lithraea molleoides (Vell.) Engl.	0.0347222
Anisocapparis speciosa (Griseb.) Cornejo & H.HIltis	0.0347222
Araujia angustifolia (Hook. & Arn.) Steud.	0.0347222
Cereus argentinensis Britton & Rose✤	0.0347222
Cynophalla flexuosa (L.) J.Presl	0.0347222
Echinopsis rhodotricha K.Schum.	0.0347222
Funastrum clausum (Jacq.) Schltr.	0.0347222
Gonolobus rostratus (Vahl) Roem. & Schult.	0.0347222
Harrisia martinii (Labour.) Britton	0.0347222
Opuntia elata Salm-Dyck	0.0347222
Allagoptera campestris (Mart.) Kuntze	0.0277778
Annona neosalicifolia H.Rainer	0.0277778
Araujia plumosa Schltdl.	0.0277778
Araujia stormiana Morong	0.0277778
Araujia variegata (Griseb.) Fontella & Goyder	0.0277778
Brasiliopuntia brasiliensis (Willd.) A.Berger	0.0277778
Campomanesia aurea O.Berg	0.0277778
Campomanesia guaviroba (DC.) Kiaersk.	0.0277778
Celtis spinosa Spreng.	0.0277778
Chrysophyllum marginatum (Hook. & Arn.) Radlk.	0.0277778
Citronella gongonha (Mart.) R.A.Howard	0.0277778
Crateva tapia L.	0.0277778
Cyclanthera hystrix (Gillies) Arn.	0.0277778
Cyclospermum leptophyllum (Pers.) Britton & P.Wilson	0.0277778
Eugenia lilloana D.Legrand✤	0.0277778
Glandularia peruviana (L.) Small	0.0277778
Hypochaeris microcephala (Sch.Bip.) Cabrera	0.0277778
Ilex dumosa Reissek	0.0277778
Inga affinis DC.	0.0277778
Inga marginata Willd.	0.0277778
Lippia lippioides (Cham.) Rusby	0.0277778
Macroscepis grandiflora (Mart.) H.A.Keller & Liede	0.0277778
Melothria cucumis Vell.	0.0277778
Melothria warmingii Cogn.	0.0277778
Myrceugenia euosma (O.Berg) D.Legrand	0.0277778
Myrcia anomala Cambess.	0.0277778
Myrcia oblongata DC.	0.0277778
Myrcia palustris DC.	0.0277778
Myrciaria delicatula (DC.) O.Berg	0.0277778
Neltuma chilensis (Molina) C.E.Hughes & G.P.Lewis	0.0277778
Opuntia aff. stenarthra K.Schum.	0.0277778
Oxalis debilis Kunth	0.0277778
Passiflora edulis Sims	0.0277778
Passiflora mooreana Hook.f.	0.0277778
Psidium australe Cambess.	0.0277778
Psidium grandifolium DC.	0.0277778
Psidium guineense Sw.	0.0277778
Psidium missionum D.Legrand	0.0277778
Sambucus australis Cham. & Schltdl.	0.0277778
Selenicereus setaceus (Salm-Dyck ex DC.) Werderm.	0.0277778
Stetsonia coryne (Salm-Dyck) Britton & Rose	0.0277778
Urera baccifera (L.) Gaudich.	0.0277778
Xylopia brasiliensis Spreng.	0.0277778
Alstroemeria aurea Graham	0.0208333
Anarthrophyllum rigidum (Gillies ex Hook. & Arn.) Hieron.	0.0208333
Arjona patagonica Hombr. & Jacq. ex Decne.	0.0208333
Austrocactus patagonicus (F.A.C.Weber) Hosseus	0.0208333
Azorella trifurcata (Gaertn.) Pers.	0.0208333
Berberis ilicifolia L.f.	0.0208333
Berberis trigona Kunze ex Poepp. & Endl.	0.0208333
Bolax gummifera (Lam.) Spreng.	0.0208333
Capparicordis tweediana (Eichler) H.H.Iltis & Cornejo	0.0208333
Gamocarpha australis (Decne.) S.S.Denham & Pozner	0.0208333
Gaultheria mucronata (L.f.) Hook. & Arn.	0.0208333
Gaultheria poeppigii DC.	0.0208333
Gaultheria pumila (L.f.) D.J.Middleton	0.0208333
Geoffroea spinosa Jacq.	0.0208333
Gevuina avellana Molina	0.0208333
Gunnera magellanica Lam.	0.0208333
Harrisia bonplandii (Pfeiff.) Britton & Rose	0.0208333
Lycium ameghinoi Speg.✤	0.0208333
Olsynium junceum (E.Mey. ex C.Presl) Goldblatt	0.0208333
Opuntia quimilo K.Schum.	0.0208333
Schinus marchandii F.A.Barkley	0.0208333
Schoenoplectus californicus (C.A.Mey.) Soják	0.0208333
Taraxacum gilliesii Hook. & Arn.	0.0208333
Tristagma ameghinoi (Speg.) Speg.	0.0208333
Tropaeolum patagonicum Speg.✤	0.0208333
Typha domingensis Pers.	0.0208333
Vachellia aroma (Gillies ex Hook. & Arn.) Seigler & Ebinger	0.0208333
Vallesia glabra (Cav.) Link	0.0208333
Acanthosyris spinescens (Mart. & Eichler) Griseb.	0.0138889
Bromelia hieronymi Mez	0.0138889
Cedrela fissilis Vell.	0.0138889
Celtis chichape (Wedd.) Miq.	0.0138889
Combretum fruticosum (Loefl.) Stuntz	0.0138889
Condalia buxifolia Reissek	0.0138889
Cortaderia selloana (Schult. & Schult.f.) Asch. & Graebn.	0.0138889
Cristobalia australis (Malme) H.A.Keller & Liede	0.0138889
Cyclanthera tenuisepala Cogn.	0.0138889
Dioscorea aff. multiflora Mart. ex Griseb.	0.0138889
Dioscorea sinuata Vell.	0.0138889
Eugenia pitanga (O.Berg) Kiaersk.	0.0138889
Euterpe edulis Mart.	0.0138889
Ficus luschnathiana (Miq.) Miq.	0.0138889
Harrisia pomanensis (F.A.C.Weber ex K.Schum.) Britton & Rose	0.0138889
Hydrocotyle exigua (Urb.) Malme	0.0138889
Jacaratia corumbensis Kuntze	0.0138889
Lepidium didymum L.	0.0138889
Lippia integrifolia (Griseb.) Hieron.	0.0138889
Lycium americanum Jacq.	0.0138889
Melicoccus lepidopetalus Radlk.	0.0138889
Myrcia selloi (Spreng.) N.Silveira	0.0138889
Neltuma elata (Burkart) C.E.Hughes & G.P.Lewis	0.0138889
Neltuma ruscifolia (Griseb.) C.E.Hughes & G.P.Lewis	0.0138889
Opuntia arechavaletae Speg.	0.0138889
Oxalis brasiliensis Lodd., G.Lodd. & W.Lodd. ex Hildebr.	0.0138889
Oxalis linarantha Lourteig	0.0138889
Parkinsonia praecox (Ruiz & Pav. ex Hook.) Hawkins	0.0138889
Parodia sp.	0.0138889
Passiflora alata Curtis	0.0138889
Passiflora foetida L.	0.0138889
Passiflora misera Kunth	0.0138889
Plantago australis Lam.	0.0138889
Rhipsalis aculeata F.A.C.Weber	0.0138889
Rubus sellowii Cham. & Schltdl.	0.0138889
Rumex paraguayensis D.Parodi	0.0138889
Sarcotoxicum salicifolium (Griseb.) Cornejo & H.H.Iltis	0.0138889
Trithrinax campestris (Burmeist.) Drude & Griseb.	0.0138889
Vachellia caven (Molina) Seigler & Ebinger	0.0138889
Victoria cruziana Orb.	0.0138889
Vitex megapotamica (Spreng.) Moldenke	0.0138889
Acmella oppositifolia (Lam.) R.K.Jansen	0.00694444
Aloysia polystachya (Griseb.) Moldenke	0.00694444
Amaranthus standleyanus Parodi ex Covas	0.00694444
Amphilophium carolinae (Lindl.) L.G.Lohmann	0.00694444
Aspidosperma quebracho-blanco Schltdl.	0.00694444
Bidens pilosa L.	0.00694444
Bougainvillea stipitata Griseb.	0.00694444
Canna glauca L.	0.00694444
Ceiba chodatii (Hassl.) Ravenna	0.00694444
Cereus aethiops Haw.	0.00694444
Cynanchum montevidense Spreng.	0.00694444
Deinacanthon urbanianum (Mez) Mez	0.00694444
Dioscorea microbotrya Griseb.	0.00694444
Distimake dissectus (Jacq.) Simões & Staples	0.00694444
Echinopsis leucantha (Gillies ex Salm-Dyck) Walp.✤	0.00694444
Funastrum gracile (Decne.) Schltr.	0.00694444
Gymnocalycium saglionis (Cels) Britton & Rose✤	0.00694444
Ipomoea bonariensis Hook.	0.00694444
Lycianthes asarifolia (Kunth & Bouché) Bitter	0.00694444
Lycium cestroides Schltdl.	0.00694444
Macroptilium panduratum (C.Mart. ex Benth.) Maréchal & Baudet	0.00694444
Macroscepis schreiteri (Descole & T.Mey.) H.A.Keller & Liede	0.00694444
Maytenus vitis-idaea Griseb.	0.00694444
Monvillea cavendischii (Monv.) Britton & Rose	0.00694444
Monvillea spegazzinii (F.A.C.Weber) Britton & Rose	0.00694444
Nicotiana longiflora Cav.	0.00694444
Nymphaea jamesoniana Planch.	0.00694444
Odontocarya asarifolia Barneby	0.00694444
Opuntia colubrina A.Cast.	0.00694444
Opuntia discolor Britton & Rose	0.00694444
Physalis pubescens L.	0.00694444
Portulaca grandiflora Hook.	0.00694444
Ruehssia castillonii (Lillo ex T.Mey.) H.A.Keller & Liede	0.00694444
Schinus fasciculatus (Griseb.) I.M.Johnst.	0.00694444
Schinus longifolia (Lindl.) Speg.	0.00694444
Scutia buxifolia Reissek	0.00694444
Smilax campestris Griseb.	0.00694444
Solanum hieronymi Kuntze	0.00694444
Strombocarpa torquata (Cav. ex Lag.) Hutch.✤	0.00694444
Synandrospadix vermitoxicum (Griseb.) Engl.	0.00694444
Tillandsia duratii Vis.	0.00694444
Adesmia lotoides Hook.f.	*
Aristolochia argentina Griseb.	*
Azorella filamentosa Lam.	*
Azorella lycopodioides Gaudich.	*
Azorella selago Hook.f.	*
Bolax bovei (Speg.) Dusén	*
Chaerophyllum andicola (Kunth) K.F.Chung	*
Coccoloba spinescens Morong	*
Descurainia antarctica (E.Fourn.) O.E.Schulz	*
Hoffmannseggia glauca (Ortega) Eifert	*
Hypochaeris incana (Hook. & Arn.) Macloskie	*
Lycium nodosum Miers	*
Macroscepis aurea E.Fourn.	*
Neltuma caldenia (Burkart) C.E.Hughes & G.P.Lewis✤	*
Neltuma elata (Burkart) C.E.Hughes & G.P.Lewis × Neltuma nigra (Griseb.) C.E.Hughes & G.P.Lewis	*
Nothofagus pumilio (Poepp. & Endl.) Krasser	*
Opuntia megapotamica Arechav.	*
Passiflora cincinnata Mast.	*
Prosopanche americana (R.Br.) Baill.	*
Prosopanche bonacinai Speg.	*
Rubus geoides Sm.	*
Schinus johnstonii F.A.Barkley✤	*
* For calculate weighted RFC we excluded articles where the use of plants was reported for more than one province without distinction between them. However, we included all food species at the end of the table.

## Sheet: Table S7
Supplementary Table S7
Relative Importance Index (RI) of useful species in each phytogeographic province of Argentina
Species	RI_High Andean	RI_Chaco	RI_M-P Ecotone	RI_Espinal	RI_Monte	RI_Pampean	RI_Paranaense	RI_Patagonian	RI_Prepuna	RI_Puna	RI_Subantarctic	RI_Yungas
Abildgaardia ovata (Burm.f.) Kral	0	0	0	0	0	0	0.22	0	0	0	0	0
Abutilon grandifolium (Wild.) Sweet	0	0.226891	0	0	0	0	0	0	0	0	0	0
Acaena caespitosa Gillies ex Hook. & Arn.	0	0	0	0	0.183333	0	0	0	0	0	0	0
Acaena confertissima Bitter	0	0	0	0	0	0	0	0.233333	0	0	0	0
Acaena integerrima Gillies ex Hook. & Arn.	0	0	0	0	0	0	0	0.233333	0	0	0	0
Acaena magellanica (Lam.) Vahl	0	0	0	0	0	0	0	0.233333	0	0	0.32	0
Acaena myriophylla Lindl.	0	0	0	0.4	0	0.333333	0	0	0	0	0	0
Acaena ovalifolia Ruiz & Pav.	0	0	0	0	0	0	0	0.4	0	0	0.44	0
Acaena pinnatifida Ruiz & Pav.	0	0	0	0	0	0	0	0.3	0	0	0.44	0
Acaena platyacantha Speg.	0	0	0	0	0	0	0	0.233333	0	0	0	0
Acaena sericea J.Jacq.	0	0	0	0	0	0	0	0.4	0	0	0	0
Acaena splendens Hook. & Arn.	0	0	0.4	0	0	0	0	0.5	0	0	0.44	0
Acalypha communis Müll.Arg.	0	0.092437	0	0	0	0	0	0	0	0	0	0
Acanthocalycium spiniflorum (K.Schum.) Backeb.	0	0.0756303	0	0	0	0	0	0	0	0	0	0
Acantholippia seriphioides (A.Gray) Moldenke✤	0	0	0.4	0	0.8	0	0	0.5	0	0	0	0
Acanthospermum australe (Loefl.) Kuntze	0	0.0756303	0	0	0	0	0.34	0	0	0	0	0
Acanthospermum hispidum DC.	0	0.277311	0	0	0	0	0	0	0	0	0	0
Acanthostyles buniifolius (Hook. & Arn.) R.M.King & H.Rob.	0	0.0756303	0	0	0.366667	0	0	0	0	0	0	0
Acanthosyris falcata Griseb.	0	0.462185	0	0	0	0	0.22	0	0	0	0	0
Acanthosyris spinescens (Mart. & Eichler) Griseb.	0	0	0	0	0	0	0.16	0	0	0	0	0
Acaulimalva nubigena (Walp.) Krapov.	0	0	0	0	0	0	0	0	0	0	0	0.416667
Acca sellowiana (O.Berg) Burret	0	0	0	0	0	0.333333	0	0	0	0	0	0
Achatocarpus praecox Griseb.	0	0.428571	0	0	0	0	0.26	0	0	0	0	0
Achyrocline alata (Kunth) DC.	0	0	0	0	0	0	0	0	0	0	0	0.416667
Achyrocline flaccida (Weinm.) DC.	0	0	0	0	0	0	0.16	0	0	0	0	0.291667
Achyrocline hyperchlora Blake	0	0	0	0	0	0	0	0	0	0	0	0.291667
Achyrocline satureioides (Lam.) DC.	0	0.394958	0	0.8	0	0.533333	0.34	0	0.8	0	0	0
Achyrocline tomentosa Rusby	0	0.092437	0	0.4	0	0	0	0	0	0	0	0
Acianthera aphthosa (Lindl.) Pridgeon & M.W.Chase	0	0	0	0	0	0	0.16	0	0	0	0	0
Acianthera hygrophila (Barb.Rodr.) Pridgeon & M.W.Chase	0	0	0	0	0	0	0.16	0	0	0	0	0
Acianthera pubescens (Lindl.) Pridgeon & M.W.Chase	0	0	0	0	0	0	0.16	0	0	0	0	0
Acianthera recurva (Lindl.) Pridgeon & M.W.Chase	0	0	0	0	0	0	0.16	0	0	0	0	0
Acianthera rhabdosepala (Schltr.) Chiron & C.Berg	0	0	0	0	0	0	0.16	0	0	0	0	0
Acianthera sonderana (Rchb.f.) Pridgeon & M.W.Chase	0	0	0	0	0	0	0.16	0	0	0	0	0
Acmella decumbens (Sm.) R.K.Jansen	0	0.109244	0	0	0	0.333333	0	0	0	0	0	0
Acmella oppositifolia (Lam.) R.K.Jansen	0	0.226891	0	0	0	0	0	0	0	0	0	0
Acrocomia aculeata (Jacq.) Lodd. ex Mart.	0	0.0756303	0	0	0	0	0.94	0	0	0	0	0
Actinostemon concolor (Spreng.) Müll.Arg.	0	0	0	0	0	0	0.38	0	0	0	0	0
Adenocalymma marginatum (Cham.) DC.	0	0	0	0	0	0	0.32	0	0	0	0	0
Adesmia boronioides Hook.f.	0.666667	0	0.4	0	0.183333	0	0	0.7	0	0	0.68	0
Adesmia cf. miraflorensis J.Remy	0	0	0	0	0	0	0	0	0	0.7	0	0
Adesmia horrida Gillies ex Hook. & Arn.	0	0	0	0	0	0	0	0	0	0.6	0	0
Adesmia inflexa Griseb.	0	0	0	0	0	0	0	0	0	0	0	0.291667
Adesmia minor (Hook. & Arn.) Burkart	0	0	0	0	0	0	0	0	0	0.6	0	0
Adesmia muricata (Jacq.) DC.	0	0.0756303	0	0	0	0	0	0	0	0	0	0
Adesmia pinifolia Gillies ex Hook. & Arn.	0.666667	0	0	0	0.183333	0	0	0	0	0	0	0
Adesmia trijuga Gillies ex Hook. & Arn.	0.666667	0	0	0	0	0	0	0	0	0	0	0
Adesmia volckmannii Phil.	0	0	0.4	0	0	0	0	0.3	0	0	0	0
Adiantopsis chlorophylla (Sw.) Fée	0	0	0	0	0	0	0.16	0	0	0	0	0.416667
Adiantopsis dichotoma (Sw.) T.Moore	0	0	0	0	0	0	0.16	0	0	0	0	0
Adiantum chilense Kaulf.	0	0	0	0	0	0	0	0.233333	0	0	0	0
Adiantum lorentzii Hieron.	0	0	0	0	0	0	0	0	0	0	0	0.291667
Adiantum orbignyanum Mett. ex Kuhn	0	0.0756303	0	0	0	0	0	0	0	0	0	0
Adiantum poiretii Wikstr.	0	0.0756303	0	0	0	0	0	0	0	0	0	0.291667
Adiantum pseudotinctum Hieron.	0	0.0756303	0	0	0	0	0.22	0	0	0	0	0
Adiantum raddianum C.Presl	0	0.12605	0	0	0	0.333333	0.22	0	0	0	0	0
Aechmea calyculata (E.Morren) Baker	0	0	0	0	0	0	0.16	0	0	0	0	0
Aechmea distichantha Lem.	0	0.168067	0	0	0	0	0.48	0	0	0	0	0.583333
Aeschynomene rudis Benth.	0	0	0	0	0	0	0.16	0	0	0	0	0
Agalinis fiebrigii (Diels) D'Arcy	0	0	0	0	0	0	0	0	0	0	0	0.291667
Agalinis genistifolia (Cham. & Schltdl.) D'Arcy	0	0.0756303	0	0	0	0	0	0	0	0	0	0
Ageratum conyzoides L.	0	0	0	0	0	0	0	0	0	0	0	0.416667
Airampoa ayrampo (Azara) Doweld	0	0	0	0	0	0	0	0	0.6	0	0	0.416667
Albizia inundata (Mart.) Barneby & J.W.Grimes	0	0.226891	0	0	0	0	0.16	0	0	0	0	0
Albizia niopoides (Spruce ex Benth.) Burkart	0	0	0	0	0	0	0.16	0	0	0	0	0
Aldama anchusifolia (DC.) E.E.Schill. & Panero	0	0.0756303	0	0	0	0	0	0	0	0	0	0
Aldama helianthoides (Rich.) E.E.Schill. & Panero	0.666667	0	0	0	0	0	0	0	0	0	0	0
Allagoptera campestris (Mart.) Kuntze	0	0	0	0	0	0	0.22	0	0	0	0	0
Allenrolfea vaginata (Griseb.) Kuntze	0	0.285714	0	0	0	0	0	0	0	0	0	0
Allophylus edulis (A.St.-Hil., A.Juss. & Cambess.) Hieron. ex Niederl.	0	0.243697	0	0	0	0	0.78	0	0.6	0	0	0.291667
Allophylus guaraniticus (A.St.-Hil.) Radlk.	0	0	0	0	0	0	0.5	0	0	0	0	0
Alnus acuminata Kunth	0.666667	0	0	0	0	0	0	0	0	0	0	0.291667
Aloysia citrodora Palau	0	0.268908	0.6	0.8	0.45	0.933333	0.22	0	0.9	0	0	0.416667
Aloysia decipiens Ravenna	0	0.0756303	0	0	0	0	0	0	0	0	0	0
Aloysia deserticola (Phil.) Lu-Irving & O'Leary	0	0	0	0	0	0	0	0	0	0.6	0	0
Aloysia gratissima (Gillies & Hook. ex Hook.) Tronc.	0	0.647059	0	0.8	0	0	0.28	0	0	0	0	0
Aloysia polystachya (Griseb.) Moldenke	0	0.495798	0	1	0.45	0.966667	0.22	0	0.9	0	0	0.291667
Aloysia salsoloides (Griseb.) Lu-Irving & O'Leary	0	0	0	0	0	0	0	0	0.7	0	0	0.416667
Aloysia scorodonioides (Kunth) Cham.	0	0.0756303	0	0	0	0	0	0	0	0	0	0
Aloysia virgata (Ruiz & Pav.) Pers.	0	0	0	0	0	0	0.16	0	0	0	0	0
Alstroemeria aurea Graham	0	0	0	0	0	0	0	0.233333	0	0	0.64	0
Alstroemeria patagonica Phil.	0	0	0.6	0	0	0	0	0.466667	0	0	0.32	0
Alternanthera brasiliana (L.) Kuntze	0	0	0	0	0	0	0.22	0	0	0	0	0
Alternanthera paronychioides A.St.-Hil.	0	0.0756303	0	0	0	0	0	0	0	0	0	0
Alternanthera philoxeroides (Mart.) Griseb.	0	0	0	0	0	0	0	0	0	0	0	0.291667
Alternanthera pungens Kunth	0	0.478992	0	0.6	0	0.733333	0.22	0	0.7	0	0	0
Amaranthus cf. spinosus L.	0	0.0756303	0	0	0	0	0	0	0	0	0	0
Amaranthus muricatus (Moq.) Hieron.	0	0.176471	0	0.6	0	0	0.16	0	0	0	0	0
Amaranthus standleyanus Parodi ex Covas	0	0.302521	0	0	0	0	0	0	0	0	0	0
Amaranthus viridis L.	0	0.184874	0	0	0	0	0.42	0	0	0	0	0
Amauropelta recumbens (Rosenst.) Salino & T.E.Almeida	0	0	0	0	0	0	0.16	0	0	0	0	0
Ambrosia artemisiifolia L.	0	0.151261	0	0	0	0	0.34	0	0	0	0	0
Ambrosia tenuifolia Spreng.	0	0.268908	0	0	0	0.433333	0.22	0	0	0	0	0
Amburana cearensis (Allemão) A.C.Sm.	0	0	0	0	0	0	0	0	0	0	0	0.291667
Amelichloa brachychaeta (Godr.) Arriaga & Barkworth	0	0	0	0	0	0.333333	0	0	0	0	0	0
Amomyrtella güili (Speg.) Kausel	0	0	0	0	0	0	0	0	0	0	0	0.583333
Amomyrtus luma (Molina) D.Legrand & Kausel	0	0	0	0	0	0	0	0	0	0	0.64	0
Amphilophium carolinae (Lindl.) L.G.Lohmann	0	0.411765	0	0	0	0	0.16	0	0	0	0	0
Amsinckia calycina (Moris) Chater	0	0	0	0	0	0	0	0	0	0	0.32	0
Anadenanthera colubrina (Vell.) Brenan	0	0.411765	0	0	0	0	0	0	0	0	0	0.583333
Anarthrophyllum rigidum (Gillies ex Hook. & Arn.) Hieron.	0.666667	0	0	0	0.183333	0	0	0.566667	0	0	0	0
Anathallis linearifolia (Cogn.) Pridgeon & M.W.Chase	0	0	0	0	0	0	0.16	0	0	0	0	0
Andropogon bicornis L.	0	0	0	0	0	0	0.16	0	0	0	0	0
Andropogon lateralis Nees	0	0	0	0	0	0	0.16	0	0	0	0	0
Anemia australis (Mickel) M.Kessler & A.R.Sm.	0	0.109244	0	0.4	0	0	0	0	0	0	0	0
Anemia phyllitidis (L.) Sw.	0	0	0	0	0	0	0.22	0	0	0	0	0
Anemia tomentosa (Savigny) Sw.	0	0.420168	0	0.4	0	0	0.16	0	0	0	0	0
Anemone decapetala Ard.	0	0.226891	0	0	0	0	0	0	0	0	0	0
Anemone multifida Poir.	0	0	0	0	0	0	0	0	0	0	0.44	0
Anisocapparis speciosa (Griseb.) Cornejo & H.HIltis	0	0.613445	0	0	0	0	0.16	0	0	0	0	0
Annona emarginata (Schltdl.) H.Rainer	0	0.0756303	0	0	0	0	0.44	0	0	0	0	0
Annona neosalicifolia H.Rainer	0	0	0	0	0	0	0.38	0	0	0	0	0
Annona rugulosa (Schltdl.) H.Rainer	0	0	0	0	0	0	0.36	0	0	0	0	0.291667
Anredera cordifolia (Ten.) Steenis	0	0.092437	0	0	0	0	0.16	0	0	0	0	0.416667
Apium australe Thouars	0	0	0.6	0	0	0	0	0.466667	0	0	0.76	0
Apium panul (Bertero ex DC.) Reiche	0	0	0.4	0	0.183333	0	0	0	0	0	0	0
Apium prostratum Vent.	0	0	0	0	0	0	0	0.3	0	0	0	0
Apium sellowianum H.Wolff	0.666667	0	0	0.4	0	0	0	0	0	0	0	0
Apuleia leiocarpa (Vogel) J.F.Macbr.	0	0	0	0	0	0	0.16	0	0	0	0	0
Aralia warmingiana (Marchal) J.Wen	0	0	0	0	0	0	0.22	0	0	0	0	0
Araucaria angustifolia (Bertol.) Kuntze	0	0.0756303	0	0	0	0	0.7	0	0	0	0	0
Araucaria araucana (Molina) K.Koch	0	0	0.6	0	0.183333	0	0	0.533333	0	0	0.64	0
Araujia angustifolia (Hook. & Arn.) Steud.	0	0.0756303	0	0	0	0	0.22	0	0	0	0	0
Araujia brachystephana (Griseb.) Fontella & Goyder	0	0.352941	0	0	0	0	0.22	0	0	0	0	0
Araujia odorata (Hook. & Arn.) Fontella & Goyder	0	0.747899	0	0.4	0	0	0.32	0	0.6	0	0	0
Araujia plumosa Schltdl.	0	0	0	0	0	0	0.22	0	0	0	0	0
Araujia sericifera Brot.	0	0.0756303	0	0	0	0.666667	0	0	0	0	0	0
Araujia stormiana Morong	0	0	0	0	0	0	0.22	0	0	0	0	0
Araujia stuckertiana (Kurtz ex Heger) Fontella & Goyder	0	0.151261	0	0	0	0	0	0	0	0	0	0
Araujia variegata (Griseb.) Fontella & Goyder	0	0.0756303	0	0	0	0	0.22	0	0	0	0	0
Archidasyphyllum diacanthoides (Less.) P.L.Ferreira, Saavedra & Groppo	0	0	0	0	0	0	0	0	0	0	0.32	0
Arenaria lanuginosa (Michx.) Rohrb.	0	0.0756303	0	0	0	0	0	0	0	0	0	0
Argemone subfusiformis G.B.Ownbey	0	0.268908	0	0.4	0	0	0	0	0	0	0	0.416667
Argyrochosma flava (Hook.) M.Kessler & A.R.Sm.	0	0	0	0	0	0	0.16	0	0	0	0	0
Argyrochosma nivea (Poir.) Windham	0	0.226891	0	0	0	0	0	0	0	0	0	0
Aristida adscensionis L.	0	0.0756303	0	0	0	0	0	0	0	0	0	0
Aristida mendocina Phil.	0	0.134454	0	0	0.266667	0	0	0	0	0	0	0
Aristida oligospira (Hack.) Henrard	0	0	0	0	0	0	0.16	0	0	0	0	0
Aristida pallens Cav.	0	0	0	0	0	0	0.16	0	0	0	0	0
Aristolochia argentina Griseb.	0	0.184874	0	0.4	0	0	0	0	0.6	0	0	0
Aristolochia elegans Mast.	0	0.0756303	0	0	0	0	0	0	0	0	0	0
Aristolochia fimbriata Cham.	0	0.0756303	0	0	0	0	0	0	0	0	0	0
Aristolochia gibertii Hook.	0	0	0	0	0	0	0.16	0	0	0	0	0
Aristolochia lingua Malme	0	0.0756303	0	0	0	0	0	0	0	0	0	0
Aristolochia stuckertii Speg.	0	0.0756303	0	0	0	0	0	0	0	0	0	0
Aristolochia triangularis Cham.	0	0	0	0.4	0	0	0.38	0	0	0	0	0
Aristolochia trilobata L.	0	0	0	0	0	0	0.16	0	0	0	0	0
Aristotelia chilensis (Molina) Stuntz	0.666667	0	0	0	0.183333	0	0	0.533333	0	0	1	0
Arjona patagonica Hombr. & Jacq. ex Decne.	0	0	0	0	0	0	0	0.233333	0	0	0	0
Arjona tuberosa Cav.	0	0	0.4	0	0.366667	0	0	0.433333	0	0	0.32	0
Armeria maritima (Mill.) Willd.	0	0	0	0	0	0	0	0.233333	0	0	0.32	0
Artemisia copa Phil.	0	0	0	0	0	0	0	0	0.6	0	0	0
Artemisia mendozana DC.	0	0	0	0.4	0	0	0	0	0	0	0	0
Asclepias barjoniifolia E.Fourn.	0	0.0756303	0	0	0	0	0	0	0	0	0	0
Asclepias mellodora A.St.-Hil.	0	0.168067	0	0	0	0	0	0	0	0	0	0
Asclepias pilgeriana Schltr.	0	0	0	0	0	0	0	0	0	0	0	0.291667
Aspicarpa sericea Griseb.	0	0.0756303	0	0	0	0	0	0	0	0	0	0
Aspidogyne kuczynskii (Porsch) Garay	0	0	0	0	0	0	0.16	0	0	0	0	0
Aspidosperma australe Müll.Arg.	0	0	0	0	0	0	0.16	0	0	0	0	0
Aspidosperma quebracho-blanco Schltdl.	0	0.957983	0	0.8	0	0	0.32	0	0	0	0	0
Aspidosperma triternatum Rojas Acosta	0	0.168067	0	0	0	0	0.16	0	0	0	0	0
Aspilia aff. pascalioides Griseb.	0	0.0756303	0	0	0	0	0	0	0	0	0	0
Aspilia pascalioides Griseb.	0	0	0	0	0	0	0.16	0	0	0	0	0
Astragalus garbancillo Cav.	0	0	0	0	0	0	0	0	0	0.6	0	0
Astragalus pehuenches Nieder	0.666667	0	0	0	0	0	0	0	0	0	0	0
Atamisquea emarginata Miers ex Hook. & Arn.	0	0.487395	0	0.4	0.183333	0	0	0	0.7	0	0	0
Atriplex lampa (Moq.) D.Dietr.✤	0	0	0.8	0	0.266667	0	0	0.533333	0.6	0	0	0
Atriplex montevidensis Spreng.	0	0	0	0.4	0	0	0	0	0	0	0	0
Atriplex undulata (Moq.) D.Dietr.	0	0.268908	0	0	0.183333	0	0	0	0	0	0	0
Augustea suffruticosa (Griseb.) Iamonico	0	0.151261	0	0	0	0	0	0	0	0	0	0
Austroblechnum penna-marina (Poir.) Gasper & V.A.O.Dittrich	0	0	0	0	0	0	0	0	0	0	0.44	0
Austrobrickellia patens (D.Don ex Hook. & Arn.) R.M.King & H.Rob.	0	0.151261	0	0	0.366667	0	0	0	0	0	0	0
Austrocactus patagonicus (F.A.C.Weber) Hosseus	0	0	0	0	0	0	0	0.233333	0	0	0	0
Austrocedrus chilensis (D.Don) Pic.Serm. & Bizzarri	0.666667	0	0	0	0	0	0	0.233333	0	0	0.76	0
Axonopus compressus (Sw.) P.Beauv.	0	0	0	0	0	0	0.32	0	0	0	0	0
Azara lanceolata Hook.f.	0	0	0	0	0	0	0	0	0	0	0.32	0
Azara microphylla Hook.f.	0	0	0	0	0	0	0	0	0	0	0.32	0
Azolla filiculoides Lam.	0	0.260504	0	0	0	0	0	0.233333	0	0	0	0
Azorella compacta Phil.	0	0	0	0	0	0	0	0	0.7	0	0	0.291667
Azorella monantha Clos	0	0	0.6	0	0	0	0	0.833333	0	0	0.32	0
Azorella prolifera (Cav.) G.M.Plunkett & A.N.Nicolas	0.666667	0	0.4	0	0.266667	0	0	1	0	0	0.44	0
Azorella trifurcata (Gaertn.) Pers.	0.666667	0	0	0	0	0	0	0.566667	0	0	0	0
Azorella trisecta (H.Wolff) Mart.Fernández & C.I.Calviño	0	0	0	0	0	0	0	0	0	0.6	0	0
Baccharis albida Hook. & Arn.	0	0.0756303	0	0	0	0	0	0	0	0	0	0
Baccharis aliena (Spreng.) Joch.Müll.	0	0.260504	0	0.4	0	0	0	0	0	0	0	0
Baccharis artemisioides Hook. & Arn.	0	0	0	0	0	0.333333	0	0	0	0	0	0
Baccharis articulata (Lam.) Pers.	0	0.361345	0	0.6	0	0.766667	0.28	0	0	0	0	0
Baccharis boliviensis (Wedd.) Cabrera	0.666667	0	0	0	0	0	0	0	0	0.7	0	0
Baccharis cf. vulneraria Baker	0	0	0	0	0	0	0.16	0	0	0	0	0
Baccharis coridifolia DC.	0	0.352941	0	0.4	0	0.566667	0.32	0	0	0	0	0.291667
Baccharis crispa Spreng.	0	0.252101	0	0.6	0	0	0	0	0	0	0	0
Baccharis dracunculifolia DC.	0.666667	0.0756303	0	0	0	0	0.32	0	0	0	0	0.291667
Baccharis flabellata Hook. & Arn.	0	0.226891	0	0	0	0	0	0	0	0	0	0
Baccharis genistifolia DC.	0	0	0	0	0	0.333333	0	0	0	0	0	0
Baccharis gilliesii A.Gray	0	0	0	0	0.183333	0	0	0	0	0	0	0
Baccharis glutinosa Pers.	0	0.151261	0	0	0	0	0.16	0	0	0	0.32	0
Baccharis grisebachii Hieron.	0	0	0	0	0	0	0	0	0	0.8	0	0.291667
Baccharis linearifolia (Lam.) Pers.	0	0	0	0	0.183333	0	0.16	0	0	0	0	0.291667
Baccharis microdonta DC.	0	0	0	0	0	0	0	0	0	0	0	0.291667
Baccharis notosergila Griseb.	0	0.210084	0	0	0	0	0.16	0	0	0	0	0
Baccharis obovata Hook. & Arn.	0	0	0	0	0	0	0	0.233333	0	0	0.44	0
Baccharis oxyodonta DC.	0	0	0	0	0	0	0.16	0	0	0	0	0
Baccharis patagonica Hook. & Arn.	0	0	0	0	0	0	0	0.233333	0	0	0	0
Baccharis punctulata DC.	0	0	0	0	0	0	0.16	0	0	0	0	0
Baccharis sagittalis (Less.) DC.	0.666667	0	0.4	0	0	0	0	0.5	0	0	0.56	0
Baccharis salicifolia (Ruiz & Pav.) Pers.	0	0.546218	0.4	0	0.45	0	0	0.666667	0.6	0	0.44	0
Baccharis sculpta Griseb.	0.666667	0	0	0	0	0	0	0	0	0	0	0.291667
Baccharis spartioides (Hook. & Arn. ex DC.) J.Remy	0	0	0	0	0.55	0	0	0	0	0	0	0
Baccharis spicata (Lam.) Baill.	0	0.0756303	0	0.4	0	0	0	0	0	0	0	0
Baccharis tenella Hook. & Arn.	0	0	0	0	0.183333	0	0	0	0	0	0	0
Baccharis tola Phil.	0	0	0	0	0	0	0	0	0	0.6	0	0
Baccharis trimera (Less.) DC.	0.666667	0.151261	0	0.4	0.266667	0.533333	0.16	0.3	0	0	0	0.416667
Baccharis ulicina Hook. & Arn.	0	0.0756303	0	0	0	0	0	0	0	0	0	0
Balbisia gracilis (Meyen) Hunz. & Ariza	0	0	0.4	0	0	0	0	0.366667	0	0	0	0
Balfourodendron riedelianum (Engl.) Engl.	0	0	0	0	0	0	0.54	0	0	0	0	0
Banara tomentosa Clos	0	0	0	0	0	0	0.16	0	0	0	0	0
Barbosella cogniauxiana (Speg. & Kraenzl.) Schltr.	0	0	0	0	0	0	0.16	0	0	0	0	0
Bastardiopsis densiflora (Hook. & Arn.) Hassl.	0	0	0	0	0	0	0.16	0	0	0	0	0
Bauhinia argentinensis Burkart	0	0.109244	0	0	0	0	0	0	0	0	0	0
Bauhinia forficata Link	0	0.285714	0	0.8	0	0.733333	0.5	0	0.6	0	0	0
Begonia cucullata Willd.	0	0	0	0	0	0	0.34	0	0	0	0	0
Berberis darwinii Hook.	0	0	0	0	0.183333	0	0	0.3	0	0	0.88	0
Berberis empetrifolia Lam.	0	0	0	0	0	0	0	0.3	0	0	0.52	0
Berberis ilicifolia L.f.	0	0	0	0	0	0	0	0.233333	0	0	0	0
Berberis lilloana Job	0	0	0	0	0	0	0	0	0	0	0	0.291667
Berberis microphylla G.Forst.	0	0	1	0.4	0.183333	0	0	0.966667	0	0	0.76	0
Berberis ruscifolia Lam.	0	0.226891	0	0.4	0	0	0	0	0	0	0	0
Berberis trigona Kunze ex Poepp. & Endl.	0	0	0	0	0	0	0	0	0	0	0.52	0
Bidens andicola Kunth	0.666667	0	0	0	0	0	0	0	0	0.8	0	0.583333
Bidens pilosa L.	0.666667	0.210084	0	0	0	0	0.16	0	0	0	0	0.583333
Bidens subalternans DC.	0	0.109244	0	0	0	0	0.34	0	0	0	0	0
Billbergia nutans H.Wendl. ex Regel	0	0	0	0	0	0	0.16	0	0	0	0	0
Billbergia zebrina (Herb.) Lindl.	0	0	0	0	0	0	0.16	0	0	0	0	0
Bixa orellana L.	0	0	0	0	0	0	0.16	0	0	0	0	0
Blechnum auriculatum Cav.	0	0	0	0	0	0	0.26	0	0	0	0	0
Blepharocalyx salicifolius (Kunth) O.Berg	0	0.0756303	0	0.4	0	0.766667	0	0	0	0	0	0
Blumenbachia dissecta (Hook. & Arn.) Weigend & J.Grau	0	0	0.4	0	0	0	0	0.4	0	0	0	0
Blumenbachia sylvestris Poepp.	0	0	0	0	0	0	0	0	0	0	0.32	0
Bocconia integrifolia Bonpl.	0	0	0	0	0	0	0	0	0	0	0	0.583333
Boehmeria caudata Sw.	0	0	0	0	0	0	0	0	0	0	0	0.458333
Bolax gummifera (Lam.) Spreng.	0	0	0	0	0	0	0	0.566667	0	0	0	0
Boquila trifoliolata (DC.) Decne.	0	0	0	0	0	0	0	0	0	0	0.32	0
Borreria poaya (A.St.-Hil.) DC.	0	0	0	0	0	0	0.16	0	0	0	0	0
Bothriochloa springfieldii (Gould) Parodi	0	0.0756303	0	0	0.183333	0	0	0	0	0	0	0
Bougainvillea praecox Griseb.	0	0.268908	0	0	0	0	0	0	0	0	0	0
Bougainvillea spinosa (Cav.) Heimerl	0	0	0	0	0.183333	0	0	0	0	0	0	0
Bougainvillea stipitata Griseb.	0	0.285714	0	0	0	0	0	0	0	0	0	0.416667
Bouteloua aristidoides (Kunth) Griseb.	0	0.0756303	0	0	0	0	0	0	0	0	0	0
Bouteloua curtipendula (Michx.) Torr.	0.666667	0	0	0	0	0	0	0	0	0	0	0
Bouteloua megapotamica (Spreng.) Kuntze	0	0.0756303	0	0	0	0	0	0	0	0	0	0
Brasiliopuntia brasiliensis (Willd.) A.Berger	0	0	0	0	0	0	0.32	0	0	0	0	0
Brasiliorchis picta (Hook.) R.B.Singer, S.Koehler & Carnevali	0	0	0	0	0	0	0.32	0	0	0	0	0
Bromelia balansae Mez	0	0	0	0	0	0	0.72	0	0	0	0	0
Bromelia hieronymi Mez	0	0.470588	0	0	0	0	0	0	0	0	0	0
Bromelia serra Griseb.	0	0.394958	0	0	0	0	0.32	0	0	0	0	0
Bromus catharticus Vahl	0	0	0.4	0	0.183333	0	0	0	0	0	0	0
Brunfelsia australis Benth.	0	0	0	0	0	0	0.22	0	0	0	0	0
Brunfelsia pilosa Plowman	0	0	0	0	0	0	0.16	0	0	0	0	0
Buchnera longifolia Kunth	0	0	0	0	0	0	0.16	0	0	0	0	0
Buddleja araucana Phil.	0	0	0.4	0	0.266667	0	0	0.433333	0	0	0	0
Buddleja cordobensis Griseb.	0	0.252101	0	0.4	0	0	0	0	0	0	0	0
Buddleja globosa Hope	1	0	0	0	0	0	0	0.433333	0	0	0.56	0
Buddleja mendozensis Benth.	0	0.168067	0	0	0.183333	0	0	0	0.6	0	0	0
Buddleja stachyoides Cham. & Schltdl.	0	0.092437	0	0	0	0	0.16	0	0	0	0	0.291667
Buddleja tucumanensis Griseb.	0.666667	0	0	0	0	0	0	0	0	0	0	0.416667
Bulbophyllum napelli Lindl.	0	0	0	0	0	0	0.16	0	0	0	0	0
Bulbostylis capillaris (L.) C.B.Clarke	0	0.151261	0	0	0	0	0	0	0	0	0	0
Bulbostylis juncoides (Vahl) Kük. & Herter	0	0	0	0	0	0	0.22	0	0	0	0	0
Bulnesia foliosa Griseb.	0	0.226891	0	0	0	0	0	0	0	0	0	0
Bulnesia retama (Gillies ex Hook. & Arn.) Griseb.	0	0	0	0.4	0.283333	0	0	0	0	0	0	0
Butia yatay (Mart.) Becc.	0	0	0	0	0	0	0.16	0	0	0	0	0
Byttneria filipes Mart. ex K.Schum.	0	0.151261	0	0	0	0	0	0	0	0	0	0
Cabomba caroliniana A.Gray	0	0.0756303	0	0	0	0	0	0	0	0	0	0
Cabralea canjerana (Vell.) Mart.	0	0	0	0	0	0	0.44	0	0	0	0	0
Caiophora lateritia Klotzsch	0	0	0	0	0	0	0	0	0	0	0	0.583333
Calceolaria filicaulis Clos	0	0	0	0	0	0	0	0.233333	0	0	0	0
Calceolaria uniflora Lam.	0	0	0	0	0	0	0	0.233333	0	0	0	0
Calea pinnatifida (R.Br.) Less.	0	0	0	0	0	0	0.16	0	0	0	0	0
Calliandra foliolosa Benth.	0	0	0	0	0	0	0.38	0	0	0	0	0
Callianthe pauciflora (A.St.-Hil.) Dorr	0	0.151261	0	0	0	0	0	0	0	0	0	0
Callitriche lechleri (Hegelm.) Fassett	0	0	0	0	0	0	0	0.233333	0	0	0	0
Calycera herbacea Cav.	0	0	0	0.4	0	0	0	0	0	0	0	0
Calycophyllum multiflorum Griseb.	0	0.0756303	0	0	0	0	0	0	0	0	0	0
Campomanesia aurea O.Berg	0	0	0	0	0	0	0.22	0	0	0	0	0
Campomanesia guaviroba (DC.) Kiaersk.	0	0	0	0	0	0	0.32	0	0	0	0	0
Campomanesia guazumifolia (Cambess.) O.Berg	0	0	0	0	0	0	0.66	0	0	0	0	0
Campomanesia xanthocarpa O.Berg	0	0	0	0	0	0	0.88	0	0	0	0	0
Campovassouria cruciata (Vell.) R.M.King & H.Rob.	0	0	0	0	0	0	0	0	0	0	0	0.291667
Campuloclinium macrocephalum (Less.) DC.	0	0.109244	0	0	0	0.333333	0	0	0	0	0	0
Campylocentrum grisebachii Cogn.	0	0	0	0	0	0	0.16	0	0	0	0	0
Campylocentrum neglectum (Rchb.f. & Warm.) Cogn.	0	0	0	0	0	0	0.16	0	0	0	0	0
Campyloneurum aglaolepis (Alston) de la Sota	0	0	0	0	0	0	0	0	0	0	0	0.291667
Campyloneurum nitidum (Kaulf.) C.Presl	0	0	0	0	0	0	0.16	0	0	0	0	0
Canavalia brasiliensis Mart. ex Benth.	0	0	0	0	0	0	0.16	0	0	0	0	0
Canna glauca L.	0	0.226891	0	0	0	0	0	0.233333	0	0	0	0
Canna indica L.	0	0.151261	0	0	0	0.666667	0.54	0	0	0	0	0.583333
Canna paniculata Ruiz & Pav.	0	0	0	0	0	0	0.16	0	0	0	0	0
Cantinoa althaeifolia (Pohl ex Benth.) Harley & J.F.B.Pastore	0	0	0	0	0	0	0.22	0	0	0	0	0
Cantinoa mutabilis (Rich.) Harley & J.F.B.Pastore	0	0.092437	0	0.6	0	0	0.22	0	0	0	0	0.291667
Capanemia micromera Barb.Rodr.	0	0	0	0	0	0	0.16	0	0	0	0	0
Capanemia superflua (Rchb.f.) Garay	0	0	0	0	0	0	0.16	0	0	0	0	0
Capparicordis tweediana (Eichler) H.H.Iltis & Cornejo	0	0.571429	0	0	0	0	0.26	0	0	0	0	0
Capsicum baccatum L.	0	0.0756303	0	0	0	0	0.28	0	0	0	0	0
Capsicum chacoense Hunz.	0	0.571429	0	0.4	0	0	0.22	0	0	0	0	0
Capsicum eximium Hunz.	0	0	0	0	0	0	0	0	0	0	0	0.291667
Capsicum flexuosum Sendtn.	0	0	0	0	0	0	0.16	0	0	0	0	0
Cardionema ramosissima (Weinm.) A.Nelson & J.F.Macbr.	0	0.0756303	0	0	0	0	0	0	0	0	0	0
Cardiospermum corindum L.	0	0.092437	0	0	0	0	0	0	0	0	0	0
Cardiospermum halicacabum L.	0	0.336134	0	0	0	0	0.22	0	0	0	0	0
Casearia decandra Jacq.	0	0	0	0	0	0	0.16	0	0	0	0	0
Casearia sylvestris Sw.	0	0	0	0	0	0	0.22	0	0	0	0	0
Castela coccinea Griseb.	0	0.588235	0	0	0	0	0	0	0	0	0	0
Catasetum fimbriatum (C.Morren) Lindl. & Paxton	0	0	0	0	0	0	0.44	0	0	0	0	0
Cattleya cernua (Lindl.) C.Berg	0	0	0	0	0	0	0.16	0	0	0	0	0
Cayaponia bonariensis (Mill.) Mart.Crov.	0	0	0	0	0	0	0.22	0	0	0	0	0
Cayaponia citrullifolia (Griseb.) Cogn. ex Griseb.	0	0.168067	0	0	0	0	0	0	0	0	0	0
Cayaponia podantha Cogn.	0	0.0756303	0	0	0	0	0.16	0	0	0	0	0
Cecropia pachystachya Trécul	0	0.142857	0	0.4	0	0.433333	0.44	0	0	0	0	0
Cedrela angustifolia DC.	0.666667	0	0	0	0	0	0	0	0	0	0	0.583333
Cedrela fissilis Vell.	0	0	0	0	0	0	0.86	0	0	0	0	0
Ceiba chodatii (Hassl.) Ravenna	0	0.470588	0	0	0	0	0	0	0	0	0	0
Ceiba speciosa (A.St.-Hil.) Ravenna	0	0.134454	0	0	0	0	0.6	0	0	0	0	0
Celtis chichape (Wedd.) Miq.	0	0.445378	0	0	0	0	0	0	0	0	0	0
Celtis group (Celtis tala Gillies ex Planch. + Celtis pallida Torr.)	0	0.663866	0	0.8	0.183333	1	0	0	0.7	0	0	0
Celtis iguanaea (Jacq.) Sarg.	0.666667	0.596639	0	0	0	0	0.62	0	0.6	0	0	0.583333
Celtis spinosa Spreng.	0	0	0	0	0	0	0.22	0	0	0	0	0
Cenchrus chilensis (E.Desv.) Morrone	0.666667	0	0	0	0	0	0	0	0	0.6	0	0
Cenchrus echinatus L.	0	0.0756303	0	0	0	0	0.22	0	0	0	0	0
Cenchrus longispinus (Hack.) Fernald	0	0.0756303	0	0	0	0	0	0	0	0	0	0
Cenchrus myosuroides Kunth	0	0.243697	0	0	0	0	0.16	0	0	0	0	0
Cenchrus pilcomayensis (Mez) Morrone	0	0.184874	0	0	0	0	0	0	0	0	0	0
Cenchrus spinifex Cav.	0	0.0756303	0	0	0	0	0	0	0	0	0	0
Centaurium cachanlahuen (Molina) B.L.Rob.	0	0	0.4	0	0	0	0	0.633333	0	0	0.44	0
Centella asiatica (L.) Urb.	0	0	0	0.6	0	0	0	0	0	0	0	0
Centratherum punctatum Cass.	0	0	0	0	0	0	0.16	0	0	0	0	0
Ceratophyllum demersum L.	0	0.0756303	0	0	0	0	0	0	0	0	0	0
Cereus aethiops Haw.	0	0.0756303	0	0	0.183333	0	0	0	0	0	0	0
Cereus argentinensis Britton & Rose✤	0	0.0756303	0	0	0	0	0.22	0	0	0	0	0
Cereus forbesii Otto ex C.F.Först.	0	0.588235	0	0	0	0	0	0	0	0	0	0
Cereus stenogonus K.Schum.	0	0.092437	0	0	0	0	0.7	0	0	0	0	0
Cereus uruguayanus R.Kiesling	0	0	0	0	0	0	0.28	0	0	0	0	0
Cestrum laevigatum Schltdl.	0	0	0	0	0	0	0.16	0	0	0	0	0
Cestrum lorentzianum Griseb.	0	0	0	0	0	0	0	0	0.7	0	0	0
Cestrum parqui L'Hér.	0	0.521008	0	0	0.183333	0.333333	0.16	0.233333	0.6	0	0.32	0
Cestrum strigilatum Ruiz & Pav.	0	0.0756303	0	0	0	0	0	0	0	0	0	0
Chamaecrista desvauxii (Collad.) Killip	0	0	0	0	0	0	0.16	0	0	0	0	0
Chamaecrista repens (Vogel) H.S.Irwin & Barneby	0	0	0	0	0	0	0.16	0	0	0	0	0
Chamissoa altissima (Jacq.) Kunth	0	0	0	0	0	0	0	0	0	0	0	0.291667
Chaptalia nutans (L.) Pol.	0	0.109244	0	0	0	0	0.22	0	0	0	0	0.583333
Chaptalia sinuata (Less.) Baker	0	0.0756303	0	0	0	0	0	0	0	0	0	0
Cheilanthes glauca (Cav.) Mett.	0	0	0	0	0	0	0	0.3	0	0	0	0
Cheilanthes micropteris Sw.	0	0	0	0	0	0	0.16	0	0	0	0	0
Cheilanthes obducta Mett. ex Kuhn	0	0.151261	0	0	0	0	0	0	0	0	0	0
Chenopodium hircinum Schrad.	0.666667	0	0	0	0	0.566667	0	0	0	0	0	0
Chenopodium quinoa Willd.	0	0.0756303	0	0.6	0	0.333333	0	0.233333	0.6	0.6	0	0.875
Chevreulia sarmentosa (Pers.) S.F.Blake	0	0	0	0	0	0	0.16	0	0	0	0	0
Chiliophyllum densifolium Phil.	0.666667	0	0	0	0	0	0	0	0	0	0	0
Chiliotrichum diffusum (G.Forst.) Kuntze	0	0	0	0	0	0	0	0	0	0	0.32	0
Chloris barbata Sw.	0	0.0756303	0	0	0	0	0	0	0	0	0	0
Chloris castilloniana Lillo & Parodi	0	0.092437	0	0	0	0	0	0	0	0	0	0
Chloris halophila Parodi	0.666667	0	0	0	0	0	0	0	0	0	0	0
Chloroleucon tenuiflorum (Benth.) Barneby & J.W.Grimes	0	0	0	0	0	0	0.32	0	0	0	0	0
Chomelia obtusa Cham. & Schltdl.	0	0	0	0	0	0	0.16	0	0	0	0	0
Chromolaena caaguazuensis (Hieron.) R.M.King & H.Rob.	0	0	0	0	0	0	0.16	0	0	0	0	0
Chromolaena christieana (Baker) R.M.King & H.Rob.	0	0.168067	0	0	0	0	0	0	0	0	0	0
Chromolaena hirsuta (Hook. & Arn.) R.M.King & H.Rob.	0	0.0756303	0	0	0	0	0	0	0	0	0	0
Chromolaena hookeriana (Griseb.) R.M.King & H.Rob.	0	0	0	0	0	0	0	0	0	0	0	0.583333
Chromolaena ivifolia (L.) R.M.King & H.Rob.	0	0	0	0	0	0	0.16	0	0	0	0	0
Chrysophyllum gonocarpum (Mart. & Eichler) Engl.	0	0.0756303	0	0	0	0	0.82	0	0	0	0	0.583333
Chrysophyllum marginatum (Hook. & Arn.) Radlk.	0	0	0	0	0	0	0.22	0	0	0	0	0
Chuquiraga acanthophylla Wedd.	0	0	0	0	0	0	0	0	0	0.7	0	0
Chuquiraga avellanedae Lorentz	0	0	0	0	0	0	0	0.533333	0	0	0	0
Chuquiraga erinacea D.Don	0.666667	0	0.4	0	0.183333	0	0	0	0	0	0	0
Chuquiraga longiflora (Griseb.) Hieron.	0.666667	0	0	0	0	0	0	0	0	0	0	0
Chuquiraga oppositifolia D.Don	0.666667	0	0	0	0	0	0	0	0	0	0	0
Chusquea culeou E.Desv.	0	0	0.6	0	0	0	0	0.233333	0	0	0.96	0
Chusquea ramosissima Lindm.	0	0	0	0	0	0	0.78	0	0	0	0	0
Cienfuegosia drummondii (A.Gray) Lewton	0	0.0756303	0	0	0	0	0	0	0	0	0	0
Cinnagrostis curvula (Wedd.) P.M.Peterson, Soreng, Romasch. & Barberá	0.666667	0	0	0	0	0	0	0	0	0	0	0
Cinnagrostis rigescens (J.Presl) P.M.Peterson, Soreng, Romasch. & Barberá	0.666667	0	0	0	0	0	0	0	0	0	0	0
Cissampelos pareira L.	0	0.134454	0	0	0	0	0.22	0	0	0	0	0.291667
Cissus palmata Poir.	0	0.168067	0	0	0	0	0	0	0	0	0	0
Cissus striata Ruiz & Pav.	0	0	0	0	0	0	0.16	0	0	0	0	0
Cissus sulcicaulis (Baker) Planch.	0	0	0	0	0	0	0.16	0	0	0	0	0
Cissus tweediana (Baker) Griseb.	0	0.0756303	0	0	0	0	0	0	0	0	0	0
Cissus verticillata (L.) Nicolson & C.E.Jarvis	0	0	0	0	0	0	0.22	0	0	0	0	0
Citronella gongonha (Mart.) R.A.Howard	0	0	0	0	0	0	0.22	0	0	0	0	0
Citronella paniculata (Mart.) R.A.Howard	0	0	0	0	0	0	0.16	0	0	0	0	0
Cleistocactus baumannii (Lem.) Lem.	0	0.462185	0	0	0	0	0.22	0	0	0	0	0
Cleistocactus smaragdiflorus (F.A.C.Weber) Britton & Rose	0	0.0756303	0	0	0	0	0	0	0	0	0	0
Clematis bonariensis Juss. ex DC.	0	0	0	0	0	0	0.16	0	0	0	0	0
Clematis campestris A.St.-Hil.	0	0.151261	0	0	0	0	0	0	0	0	0	0
Clematis haenkeana C.Presl	0	0	0	0	0	0	0	0	0	0	0	0.291667
Clematis montevidensis Spreng.	0	0.327731	0	0	0	0	0.16	0	0.7	0	0	0
Clinopodium bolivianum (Benth.) Kuntze	0	0	0	0	0	0	0	0	0	0	0	0.291667
Clinopodium darwinii (Benth.) Kuntze	0	0	0.8	0	0	0	0	0.366667	0	0	0	0
Clinopodium gilliesii (Benth.) Kuntze	0.666667	0.0756303	0	0.4	0	0	0	0	1	0.9	0	0.708333
Clinopodium odorum (Griseb.) Harley	0.666667	0.0756303	0	0	0	0	0	0	0	0	0	0
Cliococca selaginoides (Lam.) C.M.Rogers & Mildner	0	0.0756303	0	0	0	0.333333	0	0	0	0	0	0
Cnidoscolus albomaculatus (Pax) I.M.Johnst.	0	0.226891	0	0	0	0	0.16	0	0	0	0	0
Cnidoscolus urens (L.) Arthur	0	0.0756303	0	0	0	0	0	0	0	0	0	0
Coccoloba spinescens Morong	0	0.151261	0	0	0	0	0	0	0	0	0	0
Coccoloba tiliacea Lindau	0.666667	0	0	0	0	0	0	0	0	0	0	0
Coleataenia prionitis (Nees) Soreng	0	0.0756303	0	0	0	0	0.34	0	0	0	0	0
Colignonia glomerata Griseb.	0	0	0	0	0	0	0	0	0	0	0	0.291667
Collaea stenophylla (Hook. & Arn.) Benth.	0	0	0	0	0	0	0.16	0	0	0	0	0
Colletia hystrix Clos	0	0	0	0	0	0	0	0	0	0	0.32	0
Colletia spinosissima J.F.Gmel.	0	0.184874	0	0.4	0	0.333333	0	0	0	0	0	0
Colliguaja integerrima Gillies & Hook.	0	0	0.8	0	0	0	0	0.233333	0	0	0.32	0
Colobanthus cf. lycopodioides Griseb.	0	0	0	0	0	0	0	0.233333	0	0	0	0
Combretum fruticosum (Loefl.) Stuntz	0	0	0	0	0	0	0.32	0	0	0	0	0
Commelina diffusa Burm.f.	0	0	0	0	0	0.333333	0	0	0	0	0	0
Commelina erecta L.	0	0.336134	0	0.4	0	0.666667	0.38	0	0	0	0	0.291667
Condalia buxifolia Reissek	0	0.336134	0	0	0	0	0	0	0	0	0	0
Condalia microphylla Cav.✤	0	0.495798	0	0.6	1	0	0	0	0	0	0	0
Condalia montana A.Cast.	0	0.226891	0	0	0	0	0	0	0	0	0	0
Condea floribunda (Briq.) Harley & J.F.B.Pastore	0	0	0	0	0	0	0.16	0	0	0	0	0
Condylocarpon isthmicum (Vell.) A.DC.	0	0	0	0	0	0	0.16	0	0	0	0	0
Conyza blakei (Cabrera) Cabrera	0	0	0	0	0	0	0.16	0	0	0	0	0
Conyza bonariensis (L.) Cronquist	0	0.184874	0	0.4	0	0.333333	0.38	0	0	0	0	0
Conyza glandulitecta Cabrera	0	0.0756303	0	0	0	0	0	0	0	0	0	0
Conyza sumatrensis (Retz.) E.Walker	0	0	0	0	0	0	0.16	0	0	0	0	0
Copaifera langsdorffii Desf.	0	0	0	0	0	0	0.16	0	0	0	0	0
Copernicia alba Morong	0	0.243697	0	0	0	0	0.32	0	0	0	0	0
Corchorus hirtus L.	0	0.0756303	0	0	0	0	0	0	0	0	0	0
Cordia americana (L.) Gottschling & J.S.Mill.	0	0.134454	0	0	0	0	0.94	0	0	0	0	0
Cordia ecalyculata Vell.	0	0	0	0	0	0	0.52	0	0	0	0	0
Cordia trichotoma (Vell.) Arráb. ex Steud.	0	0	0	0	0	0	0.48	0	0	0	0	0
Coriaria ruscifolia L.	0	0	0	0	0	0	0	0	0	0	0.32	0
Cortaderia araucana Stapf	0	0	0.4	0	0	0	0	0.233333	0	0	0	0
Cortaderia hieronymi (Kuntze) N.P.Barker & H.P.Linder	0.666667	0	0	0	0	0	0	0	0	0	0	0
Cortaderia selloana (Schult. & Schult.f.) Asch. & Graebn.	0	0.226891	0	0	0	0.866667	0.26	0.233333	0	0	0	0.416667
Cortaderia speciosa (Nees & Meyen) Stapf	0	0	0	0	0	0	0	0	0	0.8	0	0
Corynabutilon bicolor (Phil. ex K.Schum.) Kearney	0	0	0.4	0	0	0	0	0.6	0	0	0	0
Craniolaria integrifolia Cham.	0	0	0	0	0	0	0.16	0	0	0	0	0
Crateva tapia L.	0	0	0	0	0	0	0.22	0	0	0	0	0
Cristobalia australis (Malme) H.A.Keller & Liede	0	0	0	0	0	0	0.16	0	0	0	0	0
Crotalaria incana L.	0	0.151261	0	0	0	0	0	0	0	0	0	0
Croton argenteus L.	0	0.092437	0	0.6	0	0	0.16	0	0	0	0	0
Croton argentinus Müll.Arg.	0	0.109244	0	0.4	0	0	0	0	0	0	0	0
Croton bonplandianus Baill.	0	0.226891	0	0	0	0	0.22	0	0	0	0	0
Croton glandulosus L.	0	0.0756303	0	0	0	0	0	0	0	0	0	0
Croton hieronymi Griseb.	0	0.092437	0	0	0	0	0	0	0	0	0	0
Croton lachnostachyus Baill.	0	0.310924	0	0	0	0	0.16	0	0	0	0	0
Croton lanatus Lam.	0	0.0756303	0	0	0	0	0	0	0	0	0	0
Croton parvifolius Müll.Arg.	0	0.092437	0	0	0	0	0	0	0	0	0	0
Croton serratifolius Baill.	0	0.0756303	0	0.4	0	0	0	0	0	0	0	0
Croton subpannosus Müll.Arg. ex Griseb.	0	0.142857	0	0.4	0	0	0	0	0	0	0	0
Croton urucurana Baill.	0	0	0	0	0	0	0.16	0	0	0	0	0
Cucurbita maxima Duchesne	0	0.294118	0	0	0.183333	0.333333	0.38	0	0.6	0	0	0.583333
Cucurbitella asperata (Gillies ex Hook. & Arn.) Walp.	0	0.0756303	0	0	0	0	0	0	0	0	0	0
Cunila microcephala Benth.	0	0	0	0	0	0	0.16	0	0	0	0	0
Cupania vernalis Cambess.	0	0	0	0	0	0	0.38	0	0	0	0	0
Cuphea glutinosa Cham. & Schltdl.	0	0.142857	0	0.4	0	0	0.28	0	0	0	0	0
Cuphea racemosa (L.f.) Spreng.	0	0	0	0	0	0	0.22	0	0	0	0	0
Cuscuta grandiflora Kunth	0	0	0	0	0	0	0	0	0	0	0	0.458333
Cybistax antisyphilitica (Mart.) Mart.	0	0	0	0	0	0	0.16	0	0	0	0	0
Cyclanthera hystrix (Gillies) Arn.	0	0	0	0	0	0	0.22	0	0	0	0	0
Cyclanthera tenuisepala Cogn.	0	0	0	0	0	0	0.16	0	0	0	0	0
Cyclolepis genistoides Gillies ex D.Don	0.666667	0.470588	0	0.6	0.45	0.333333	0	0	0.7	0	0	0
Cyclopogon congestus (Vell.) Hoehne	0	0	0	0	0	0	0.16	0	0	0	0	0
Cyclopogon elatus (Sw.) Schltr.	0	0	0	0	0	0	0.32	0	0	0	0	0
Cyclospermum leptophyllum (Pers.) Britton & P.Wilson	0	0.109244	0	0.4	0	0.433333	0.22	0	0	0	0	0
Cynanchum montevidense Spreng.	0	0.302521	0	0	0	0	0	0	0	0	0	0
Cynophalla flexuosa (L.) J.Presl	0	0.0756303	0	0	0	0	0.22	0	0	0	0	0
Cynophalla retusa (Griseb.) Cornejo & H.H.Iltis	0	0.411765	0	0	0	0	0.22	0	0	0	0	0
Cyperus corymbosus Rottb.	0	0.0756303	0	0	0	0	0	0	0	0	0	0
Cyperus entrerianus Boeck.	0	0.151261	0	0	0	0	0.16	0	0	0	0	0
Cyperus friburgensis Boeck.	0	0	0	0	0	0	0	0	0	0	0	0.291667
Cyperus giganteus Vahl	0	0.0756303	0	0	0	0	0.22	0	0	0	0	0
Cyperus haspan L.	0	0.0756303	0	0	0	0	0	0	0	0	0	0
Cyperus luzulae (L.) Rottb. ex Retz.	0	0	0	0	0	0	0.16	0	0	0	0	0
Cyperus niger Ruiz & Pav.	0	0.0756303	0	0	0	0	0	0	0	0	0	0
Cyperus sesquiflorus (Torr.) Mattf. & Kük. ex Kük.	0	0.0756303	0	0	0	0	0.16	0	0	0	0	0
Cyperus spectabilis Link	0	0	0	0	0	0	0	0	0	0	0	0.291667
Cyrtopodium palmifrons Rchb.f. & Warm.	0	0	0	0	0	0	0.38	0	0	0	0	0
Cyrtopodium pflanzii Schltr.	0	0.201681	0	0	0	0	0	0	0	0	0	0
Dactylaena pauciflora Griseb.	0	0.0756303	0	0	0	0	0	0	0	0	0	0
Dahlstedtia muehlbergiana (Hassl.) M.J.Silva & A.M.G.Azevedo	0	0	0	0	0	0	0.6	0	0	0	0	0
Dalbergia frutescens (Vell.) Britton	0	0	0	0	0	0	0.32	0	0	0	0	0
Daphnopsis racemosa Griseb.	0	0	0	0	0	0	0.16	0	0	0	0	0
Daucus pusillus Michx.	0	0	0	0	0	0.333333	0	0	0	0	0	0
Deinacanthon urbanianum (Mez) Mez	0	0.302521	0	0	0	0	0	0	0	0	0	0
Dendrophorbium bomanii (R.E.Fr.) C.Jeffrey	0	0	0	0	0	0	0	0	0	0	0	0.875
Dendrophorbium peregrinum (Griseb.) C.Jeffrey	0	0	0	0	0	0	0	0	0	0	0	0.291667
Denisophytum stuckertii (Hassl.) E.Gagnon & G.P.Lewis	0	0.092437	0	0	0	0	0	0	0	0	0	0
Deppea blumenaviensis (K.Schum.) Lorence	0	0	0	0	0	0	0.16	0	0	0	0	0
Deschampsia eminens (J.Presl) Saarela	0.666667	0	0	0	0	0	0	0	0	0	0	0
Desfontainia spinosa Ruiz & Pav.	0	0	0	0	0	0	0	0	0	0	0.32	0
Desmanthus acuminatus Benth.	0	0.0756303	0	0	0	0	0	0	0	0	0	0
Desmanthus paspalaceus (Lindm.) Burkart	0	0.0756303	0	0	0	0	0	0	0	0	0	0
Desmanthus tatuhyensis Hoehne	0	0.0756303	0	0	0	0	0	0	0	0	0	0
Desmanthus virgatus (L.) Willd.	0	0.151261	0	0	0	0	0	0	0	0	0	0
Desmodium affine Schltdl.	0	0	0	0	0	0	0.16	0	0	0	0	0
Desmodium incanum DC.	0	0	0	0	0	0	0.16	0	0	0	0	0
Diatenopteryx sorbifolia Radlk.	0	0	0	0	0	0	0.7	0	0	0	0	0.291667
Dicella nucifera Chodat	0	0	0	0	0	0	0.44	0	0	0	0	0
Dichondra microcalyx (Hallier f.) Fabris	0	0.109244	0	0	0	0	0.16	0	0	0	0	0
Dichondra sericea Sw.	0	0.109244	0	0	0.183333	0	0	0.233333	0	0	0	0
Dichorisandra hexandra (Aubl.) Standl.	0	0	0	0	0	0	0.32	0	0	0	0	0
Dicliptera squarrosa Nees	0	0.0756303	0	0	0	0	0	0	0	0	0	0
Didymopanax morototoni (Aubl.) Decne. & Planch.	0	0	0	0	0	0	0.16	0	0	0	0	0
Digitaria insularis (L.) Fedde	0	0.092437	0	0	0	0	0	0	0	0	0	0
Dimerostemma apense (Chodat) M.D.Moraes	0	0	0	0	0	0	0	0	0	0	0	0.291667
Dioscorea aff. multiflora Mart. ex Griseb.	0	0	0	0	0	0	0.16	0	0	0	0	0
Dioscorea microbotrya Griseb.	0	0.151261	0	0	0	0	0	0	0	0	0	0
Dioscorea sinuata Vell.	0	0	0	0	0	0	0.16	0	0	0	0	0
Diostea juncea (Gillies & Hook. ex Hook.) Miers	0	0	0.4	0	0	0	0	0	0	0	0.32	0
Diplachne fusca (L.) P.Beauv. ex Roem. & Schult.	0	0.0756303	0	0	0	0	0	0	0	0	0	0
Diplokeleba floribunda N.E.Br.	0	0.0756303	0	0	0	0	0.16	0	0	0	0	0
Diposis patagonica Skottsb.✤	0	0	0.6	0	0	0	0	0.3	0	0	0.32	0
Disakisperma dubium (Kunth) P.M.Peterson & N.W.Snow	0.666667	0.0756303	0	0	0	0	0	0	0	0	0	0
Discaria americana Gillies & Hook.	0	0.0756303	0	0	0	0.333333	0	0	0	0	0	0
Discaria chacaye (G.Don) Tortosa	0	0	0	0	0	0	0	0	0	0	0.64	0
Distimake dissectus (Jacq.) Simões & Staples	0	0.151261	0	0	0	0	0	0	0	0	0	0
Dodonaea viscosa Jacq.	0	0	0	0	0	0	0	0	0	0	0	0.291667
Dolichandra cynanchoides Cham.	0	0.352941	0	0.4	0	0	0.22	0	0	0	0	0
Dolichandra quadrivalvis (Jacq.) L.G.Lohmann	0	0	0	0	0	0	0.16	0	0	0	0	0
Dolichandra uncata (Andrews) L.G.Lohmann	0	0.134454	0	0	0	0	0.32	0	0	0	0	0
Dolichandra unguis-cati (L.) L.G.Lohmann	0	0	0	0	0	0.333333	0.28	0	0	0	0	0.708333
Dolichlasium lagascae D.Don	0	0	0	0	0.183333	0	0	0	0	0	0	0
Dorstenia brasiliensis Lam.	0	0	0	0	0	0	0.16	0	0	0	0	0
Doryopteris concolor (Langsd. & Fisch.) Kuhn	0	0.0756303	0	0	0	0	0.16	0	0	0	0	0
Doryopteris nobilis (T.Moore) C.Chr.	0	0	0	0	0	0	0.16	0	0	0	0	0
Doryopteris triphylla (Lam.) H.Christ	0	0.0756303	0	0	0	0	0	0	0	0	0	0
Drimys winteri J.R.Forst. & G.Forst.	0	0	0	0	0	0	0	0	0	0	0.84	0
Duranta serratifolia (Griseb.) Kuntze	0	0	0	0	0	0	0	0	0	0	0	0.583333
Dyckia floribunda Griseb.	0	0.092437	0	0	0	0	0	0	0	0	0	0
Dyckia longipetala Baker	0	0.0756303	0	0	0	0	0	0	0	0	0	0
Dysphania ambrosioides (L.) Mosyakin & Clemants	1	0.605042	0.4	0.8	0.45	0.633333	0.46	0.633333	1	0	0.68	0.416667
Dysphania mandonii (S.Watson) Mosyakin & Clemants	0	0	0	0.4	0	0.333333	0	0	0.9	0.7	0	0.291667
Dysphania oblanceolata (Speg.) Mosyakin & Clemants✤	0	0	0.4	0	0	0	0	0	0	0	0	0
Dysphania retusa (Juss. ex Moq.) Mosyakin & Clemants	0	0	0	0	0	0.333333	0	0	0	0	0	0
Echinodorus paniculatus Micheli emend. Rataj	0	0.0756303	0	0	0	0	0	0	0	0	0	0
Echinopsis aurea Britton & Rose	0	0.0756303	0	0	0	0	0	0	0	0	0	0
Echinopsis leucantha (Gillies ex Salm-Dyck) Walp.✤	0	0.0756303	0	0	0	0	0	0	0	0	0	0
Echinopsis rhodotricha K.Schum.	0	0.226891	0	0	0	0	0.22	0	0	0	0	0
Egletes viscosa (L.) Less.	0	0.0756303	0	0	0	0	0	0	0	0	0	0
Elaphoglossum gayanum (Fée) T.Moore	0	0.218487	0	0.6	0	0	0	0	0	0	0	0
Eleocharis bonariensis Nees	0	0	0	0	0	0	0.16	0	0	0	0	0
Eleocharis elegans (Kunth) Roem. & Schult.	0	0.0756303	0	0	0	0	0	0	0	0	0	0
Elephantopus mollis Kunth	0	0.0756303	0	0	0	0	0.16	0	0	0	0	0
Elionurus muticus (Spreng.) Kuntze	0	0.319328	0	0	0	0	0.32	0	0	0	0	0
Elionurus tripsacoides Humb. & Bonpl. ex Willd.	0.666667	0.134454	0	0	0	0	0.32	0	0	0	0	0
Embothrium coccineum J.R.Forst. & G.Forst.	0	0	0	0	0	0	0	0.6	0	0	0.44	0
Empetrum rubrum Vahl ex Willd.	0	0	0.4	0	0	0	0	0.3	0	0	0.32	0
Enterolobium contortisiliquum (Vell.) Morong	0	0.319328	0	0	0	0	0.66	0	0	0	0	0.291667
Enydra anagallis Gardner	0	0.0756303	0	0	0	0	0	0	0	0	0	0
Ephedra americana Humb. & Bonpl. ex Willd.	0.666667	0.092437	0	0.4	0	0	0	0	0	0.6	0	0
Ephedra cf. americana Humb. & Bonpl. ex Willd.	1	0	0	0	0	0	0	0	0	0	0	0
Ephedra chilensis C.Presl	0	0	0	0	0	0	0	0.3	0	0	0.32	0
Ephedra ochreata Miers	1	0	0.4	0	0.8	0	0	0.7	0	0	0.32	0
Ephedra triandra Tul. emend. J.H.Hunz.	1	0.344538	0	0.6	0	0	0	0	0.7	0	0	0
Ephedra tweediana Fisch. & C.A.Mey. emend. J.H.Hunz.	0	0.151261	0	0	0	0	0	0	0	0	0	0
Epidendrum rigidum Jacq.	0	0	0	0	0	0	0.16	0	0	0	0	0
Equisetum bogotense Kunth	0.666667	0	0.4	0	0	0	0	0.566667	0	0	0.56	0.416667
Equisetum giganteum L.	0	0.294118	0	0.8	0.266667	0.633333	0.28	0.3	1	0	0	0.416667
Eragrostis andicola R.E.Fr.	0.666667	0	0	0	0	0	0	0	0	0	0	0
Eragrostis mexicana (Hornem.) Link	0	0	0	0	0.183333	0	0	0	0	0	0	0
Eragrostis orthoclada Hack.	0	0.0756303	0	0	0	0	0	0	0	0	0	0
Eriochloa punctata (L.) Desv. ex Ham.	0	0.0756303	0	0	0	0	0	0	0	0	0	0
Erioneuron avenaceum (Kunth) Tateoka	0.666667	0	0	0	0	0	0	0	0	0	0	0
Eryngium coronatum Hook. & Arn.	0	0	0	0	0	0	0.22	0	0	0	0	0
Eryngium ebracteatum Lam.	0	0.0756303	0	0	0	0	0	0	0	0	0	0
Eryngium eburneum Decne.	0	0.0756303	0	0	0	0	0.22	0	0	0	0	0
Eryngium elegans Cham. & Schltdl.	0	0.109244	0	0	0	0	0	0	0	0	0	0
Eryngium horridum Malme	0	0.0756303	0	0	0	0	0.22	0	0	0	0	0
Eryngium paniculatum Cav. & Dombey ex F.Delaroche	0	0	0	0	0	0.333333	0	0.433333	0	0	0.32	0
Eryngium pristis Cham. & Schltdl.	0	0	0	0	0	0	0.16	0	0	0	0	0
Eryngium sanguisorba Cham. & Schltdl.	0	0.0756303	0	0	0	0	0	0	0	0	0	0
Erythranthe glabrata (Kunth) G.L.Nesom	0	0.0756303	0.6	0	0	0	0	0.3	0	0.6	0	0
Erythrina crista-galli L.	0	0.109244	0	0	0	0.533333	0.16	0	0	0	0	0
Erythrina falcata Benth.	0	0	0	0	0	0	0.16	0	0	0	0	0.583333
Erythrina mulungu Mart.	0	0.092437	0	0	0	0	0	0	0	0	0	0
Erythrostemon gilliesii (Wall. ex Hook.) Klotzsch	0	0.394958	0	0.4	0.183333	0	0	0	0	0	0	0
Erythroxylum argentinum O.E.Schulz	0	0.0756303	0	0	0	0	0	0	0	0	0	0
Erythroxylum cuneifolium (Mart.) O.E.Schulz	0	0.0756303	0	0	0	0	0	0	0	0	0	0
Erythroxylum deciduum A.St.-Hil.	0	0	0	0	0	0	0.32	0	0	0	0	0
Escallonia megapotamica Spreng.	0	0	0	0	0	0	0	0	0	0	0	0.416667
Escallonia virgata (Ruiz & Pav.) Pers.	0	0	0	0	0	0	0	0	0	0	0.32	0
Escobedia grandiflora (L.f.) Kuntze	0	0	0	0	0	0	0.16	0	0	0	0	0
Eugenia burkartiana (D.Legrand) D.Legrand	0	0	0	0	0	0	0.16	0	0	0	0	0
Eugenia involucrata DC.	0	0	0	0	0	0	0.54	0	0	0	0	0
Eugenia lilloana D.Legrand✤	0	0	0	0	0	0	0.22	0	0	0	0	0
Eugenia myrcianthes Nied.	0	0.092437	0	0	0	0	0.54	0	0	0	0	0
Eugenia pitanga (O.Berg) Kiaersk.	0	0	0	0	0	0	0.16	0	0	0	0	0
Eugenia pyriformis Cambess.	0	0	0	0	0	0	0.82	0	0	0	0	0
Eugenia uniflora L.	0	0.168067	0	0.4	0	0.333333	1	0	0	0	0	0.708333
Euphorbia collina Phil.	0	0	0	0	0.366667	0	0	0.3	0	0	0.44	0
Euphorbia lasiocarpa Klotzsch	0	0.0756303	0	0	0	0	0	0	0	0	0	0
Euphorbia papillosa A.St.-Hil.	0	0	0	0	0	0	0.16	0	0	0	0	0
Euphorbia portulacoides L.	0	0.134454	0	0	0	0	0	0.3	0	0	0	0
Euphorbia schickendantzii Hieron.	0	0	0	0	0.183333	0	0	0	0	0	0	0
Euphorbia sciadophila Boiss.	0	0	0	0	0	0	0.16	0	0	0	0	0
Euphorbia selloi (Klotzsch & Garcke) Boiss.	0	0.092437	0	0	0	0	0	0	0	0	0	0
Euphorbia serpens Kunth	0	0.352941	0	0.4	0	0.733333	0.32	0	0	0	0	0
Euploca procumbens (Mill.) Diane & Hilger	0	0.151261	0	0	0	0	0	0	0	0	0	0
Eurystyles actinosophila (Barb.Rodr.) Schltr.	0	0	0	0	0	0	0.16	0	0	0	0	0
Eustachys retusa (Lag.) Kunth	0	0.0756303	0	0	0	0	0	0	0	0	0	0
Euterpe edulis Mart.	0	0	0	0	0	0	0.32	0	0	0	0	0
Evolvulus sericeus Sw.	0	0	0	0	0	0	0.22	0	0	0	0	0
Fabiana densa J.Remy	0	0	0	0	0	0	0	0	0	0.6	0	0
Fabiana imbricata Ruiz & Pav.	1	0.0756303	0.4	0.6	0.183333	0.333333	0	0.933333	0	0	0.56	0
Fabiana patagonica Speg.	0	0	0	0	0.183333	0	0	0	0	0	0	0
Fabiana peckii Niederl.	0	0	0	0	0.183333	0	0	0.233333	0	0	0	0
Fabiana punensis S.C.Arroyo	0	0	0	0	0	0	0	0	0	0.6	0	0
Facelis retusa (Lam.) Sch.Bip.	0	0	0	0	0	0.333333	0	0	0	0	0	0
Festuca chrysophylla Phil.	0	0	0	0	0	0	0	0	0	0.6	0	0
Ficus luschnathiana (Miq.) Miq.	0	0.0756303	0	0	0	0	0.5	0	0	0	0	0
Flaveria bidentis (L.) Kuntze	0	0.369748	0	0	0	0	0	0	0	0	0	0
Flaveria haumanii Dimitri & Orfila	0	0.0756303	0	0	0	0	0	0	0	0	0	0
Flourensia thurifera (Molina) DC.	0	0.302521	0	0	0	0	0	0	0	0	0	0
Forsteronia glabrescens Müll.Arg.	0	0	0	0	0	0	0.16	0	0	0	0	0
Fragaria chiloensis (L.) Mill.	0	0	0.6	0	0	0	0	0.466667	0	0	0.96	0
Fridericia chica (Bonpl.) L.G.Lohmann	0	0	0	0	0	0	0.22	0	0	0	0	0
Fridericia mutabilis (Bureau & K.Schum.) Frazão & L.G.Lohmann	0	0	0	0	0	0	0.22	0	0	0	0	0
Fuchsia magellanica Lam.	0	0	0	0	0	0	0	0.533333	0	0	0.44	0
Funastrum clausum (Jacq.) Schltr.	0	0.226891	0	0	0	0	0.22	0	0	0	0	0
Funastrum gracile (Decne.) Schltr.	0	0.563025	0	0	0	0	0	0	0	0	0	0
Gaillardia megapotamica (Spreng.) Baker	0	0.285714	0	0.4	0.183333	0.333333	0	0	0	0	0	0
Galactia latisiliqua Desv.	0	0.0756303	0	0	0	0	0	0	0	0	0	0
Galianthe brasiliensis (Spreng.) E.L.Cabral & Bacigalupo	0	0	0	0	0	0	0.32	0	0	0	0	0
Galianthe centranthoides (Cham. & Schltdl.) E.L.Cabral	0	0.092437	0	0	0	0	0.16	0	0	0	0	0
Galium eriocarpum Bartl. ex DC.	0	0	0	0	0	0	0	0.233333	0	0	0	0
Galium hypocarpium (L.) Endl. ex Griseb.	0	0	0	0	0	0	0.16	0	0	0	0	0
Galium megapotamicum Spreng.	0	0	0	0	0	0	0.16	0	0	0	0	0
Galium nigroramosum (Ehrend.) Dempster	0	0	0	0	0	0	0.16	0	0	0	0	0
Galium richardianum (Gillies ex Hook. & Arn.) Endl. ex Walp.	0	0	0	0	0	0	0.16	0	0	0	0	0
Gamocarpha australis (Decne.) S.S.Denham & Pozner	0	0	0	0	0	0	0	0.233333	0	0	0	0
Gamocarpha selliana Reiche	0	0	0	0	0	0	0	0.233333	0	0	0	0
Gamochaeta americana (Mill.) Wedd.	0	0.0756303	0	0	0	0	0	0	0	0	0	0
Gamochaeta filaginea (DC.) Cabrera	0	0	0	0	0	0	0.16	0	0	0	0	0
Gamochaeta pensylvanica (Willd.) Cabrera	0	0.0756303	0	0	0	0	0	0	0	0	0	0
Gamochaeta simplicicaulis (Willd. ex Spreng.) Cabrera	0	0	0	0	0	0.333333	0	0	0	0	0	0
Gastoniella chaerophylla (Desv.) Li Bing Zhang & Liang Zhang	0	0.0756303	0	0	0	0	0	0	0	0	0	0
Gaultheria mucronata (L.f.) Hook. & Arn.	0	0	0	0	0	0	0	0.233333	0	0	0.32	0
Gaultheria poeppigii DC.	0	0	0	0	0	0	0	0	0	0	0.32	0
Gaultheria pumila (L.f.) D.J.Middleton	0	0	0	0	0	0	0	0.233333	0	0	0	0
Genipa americana L.	0	0	0	0	0	0	0.16	0	0	0	0	0
Gentianella multicaulis (Gillies ex Griseb.) Fabris	0	0.109244	0	0.4	0	0	0	0	0	0	0	0
Gentianella parviflora (Griseb.) T.N.Ho	0	0.0756303	0	0	0	0	0	0	0	0	0	0
Geoffroea decorticans (Gillies ex Hook. & Arn.) Burkart	0	1	0	0.8	0.916667	0.333333	0.32	0	0.8	0	0	0
Geoffroea spinosa Jacq.	0	0.0756303	0	0	0	0	0.16	0	0	0	0	0
Geophila repens (L.) I.M.Johnst.	0	0	0	0	0	0	0.16	0	0	0	0	0
Geranium berteroanum Colla	0	0	0	0	0	0	0	0.233333	0	0	0.44	0
Geranium sessiliflorum Cav.	0.666667	0	0	0	0	0	0	0	0	0	0	0
Gevuina avellana Molina	0	0	0	0	0	0	0	0	0	0	0.32	0
Glandularia aristigera (S.Moore) Tronc.	0	0.0756303	0	0	0	0	0	0	0	0	0	0
Glandularia dissecta (Willd. ex Spreng.) Schnack & Covas	0	0.0756303	0	0	0	0	0	0	0	0	0	0
Glandularia flava (Gillies & Hook. ex Hook.) Schnack & Covas	0	0	0	0	0.266667	0	0	0	0	0	0	0
Glandularia peruviana (L.) Small	0	0.352941	0	0	0	0	0.16	0	0	0	0	0
Glandularia platensis (Spreng.) Schnack & Covas	0	0.134454	0	0	0	0	0	0	0	0	0	0
Glandularia tenera (Spreng.) Cabrera	0	0	0	0.4	0	0	0	0	0	0	0	0
Glandularia tweedieana (Niven ex Hook.) P.Peralta	0	0.168067	0	0	0	0	0	0	0	0	0	0
Gleditsia amorphoides (Griseb.) Taub.	0	0.092437	0	0	0	0	0.6	0	0	0	0	0
Gochnatia palosanto Cabrera	0	0	0	0	0	0	0	0	0	0	0	0.291667
Goeppertia eichleri (Petersen) Borchs. & S.Suárez	0	0	0	0	0	0	0.16	0	0	0	0	0
Gomesa bifolia (Sims) M.W.Chase & N.H.Williams	0	0.168067	0	0	0	0	0.32	0	0	0	0	0.291667
Gomesa cornigera (Lindl.) M.W.Chase & N.H.Williams	0	0	0	0	0	0	0.16	0	0	0	0	0
Gomesa longicornu (Mutel) M.W.Chase & N.H.Williams	0	0	0	0	0	0	0.16	0	0	0	0	0
Gomesa longipes (Lindl. & Paxton) M.W.Chase & N.H.Williams	0	0	0	0	0	0	0.32	0	0	0	0	0
Gomesa paranaensoides M.W.Chase & N.H.Williams	0	0	0	0	0	0	0.16	0	0	0	0	0
Gomesa recurva R.Br.	0	0	0	0	0	0	0.16	0	0	0	0	0
Gomesa riograndensis (Cogn.) M.W.Chase & N.H.Williams	0	0	0	0	0	0	0.32	0	0	0	0	0
Gomphrena celosioides Mart.	0	0.0756303	0	0	0	0	0.28	0	0	0	0	0
Gomphrena haenkeana Mart.	0	0.0756303	0	0	0	0	0	0	0	0	0	0
Gomphrena martiana Gillies ex Moq.	0	0.0756303	0	0	0	0	0	0	0	0	0	0
Gomphrena mendocina (Phil.) R.E.Fr.	0	0	0	0	0.45	0	0	0	0	0	0	0
Gomphrena perennis L.	0	0.151261	0	0	0	0	0	0	0	0	0	0
Gomphrena pulchella Mart.	0	0.151261	0	0	0	0	0	0	0	0	0	0
Goniopteris riograndensis (Lindm.) Ching	0	0	0	0	0	0	0.16	0	0	0	0	0
Gonolobus rostratus (Vahl) Roem. & Schult.	0	0.193277	0	0	0	0	0.22	0	0	0	0	0
Gonopterodendron bonariensis (Griseb.) A.C.Godoy-Bürki	0	0.0756303	0	0	0	0	0	0	0	0	0	0
Gonopterodendron sarmientoi (Lorentz ex Griseb.) A.C.Godoy-Bürki	0	0.512605	0	0.4	0	0	0.22	0	0	0	0	0
Gorgonidium vermicidum (Speg.) Bogner & Nicolson	0	0	0	0	0	0	0	0	0	0	0	0.291667
Gouinia latifolia (Griseb.) Vasey	0	0.0756303	0	0	0	0	0	0	0	0	0	0
Gouinia paraguayensis (Kuntze) Parodi	0	0.092437	0	0	0	0	0	0	0	0	0	0
Grandiphyllum divaricatum (Lindl.) Docha Neto	0	0	0	0	0	0	0.16	0	0	0	0	0
Grandiphyllum edwallii (Cogn.) Docha Neto	0	0	0	0	0	0	0.16	0	0	0	0	0
Grindelia chiloensis (Cornel.) Cabrera	0	0	0.4	0	0.55	0	0	0.733333	0	0	0	0
Grindelia pulchella Dunal	0	0.210084	0	0	0	0	0	0	0	0	0	0
Guadua chacoensis (Rojas) Londoño & P.M.Peterson	0	0.151261	0	0	0	0	0.62	0	0	0	0	0
Guadua paraguayana Döll	0	0	0	0	0	0	0.22	0	0	0	0	0
Guadua trinii (Nees) Nees ex Rupr.	0	0	0	0	0	0	0.56	0	0	0	0	0
Guarea guidonia (L.) Sleumer	0	0	0	0	0	0	0.16	0	0	0	0	0
Guarea macrophylla Vahl	0	0	0	0	0	0	0.28	0	0	0	0	0
Guilleminea densa (Humb. & Bonpl. ex Schult.) Moq.	0	0.0756303	0	0.4	0	0	0	0	0	0	0	0
Gunnera apiculata Schindl.	0	0	0	0	0	0	0	0	0	0	0	0.708333
Gunnera magellanica Lam.	0	0	0	0	0	0	0	0.4	0	0	0	0
Gunnera schindleri L.E.Mora	0	0	0	0	0	0	0	0	0	0	0	0.291667
Gunnera tinctoria (Molina) Mirb.	0.666667	0	0.6	0	0.183333	0	0	0.666667	0	0	0.88	0
Gymnocalycium mihanovichii (Fric ex Gürke) Britton & Rose	0	0.0756303	0	0	0	0	0	0	0	0	0	0
Gymnocalycium ochoterenae Backeb.	0	0.0756303	0	0	0	0	0	0	0	0	0	0
Gymnocalycium saglionis (Cels) Britton & Rose✤	0	0.0756303	0	0	0	0	0	0	0	0	0	0
Gymnopogon spicatus (Spreng.) Kuntze	0	0.0756303	0	0	0	0	0.16	0	0	0	0	0
Gynerium sagittatum (Aubl.) P.Beauv.	0	0	0	0	0	0	0.22	0	0	0	0	0
Gyptis artemisifolia (Griseb.) R.M.King & H.Rob.	0	0.0756303	0	0	0	0	0	0	0	0	0	0
Handroanthus albus (Cham.) Mattos	0	0	0	0	0	0	0.16	0	0	0	0	0
Handroanthus chrysotrichus (Mart. ex A.DC.) Mattos	0	0.0756303	0	0	0	0	0	0	0	0	0	0
Handroanthus heptaphyllus (Vell.) Mattos	0	0	0	0	0	0.333333	0.7	0	0	0	0	0
Handroanthus impetiginosus (Mart. ex DC.) Mattos	0	0.168067	0	0	0	0.333333	0	0	0	0	0	0.291667
Handroanthus lapacho (K.Schum.) S.Grose	0	0	0	0	0	0	0	0	0	0	0	0.291667
Handroanthus pulcherrimus (Sandwith) S.Grose	0	0	0	0	0	0	0.16	0	0	0	0	0
Haplopappus glutinosus Cass.	0	0	0	0	0	0	0	0.233333	0	0	0	0
Haplopappus rigidus Phil.	0	0	0	0	0	0	0	0	0.7	0	0	0
Harrisia bonplandii (Pfeiff.) Britton & Rose	0	0.302521	0	0	0	0	0.16	0	0	0	0	0
Harrisia martinii (Labour.) Britton	0	0.0756303	0	0	0	0	0.22	0	0	0	0	0
Harrisia pomanensis (F.A.C.Weber ex K.Schum.) Britton & Rose	0	0.260504	0	0	0	0	0	0	0	0	0	0
Hedeoma multiflora Benth.	0	0.361345	0	0.8	0.183333	0	0	0	0	0	0	0
Heimia salicifolia Link	0	0.689076	0	0.4	0	0	0.16	0	0	0	0	0
Helietta apiculata Benth.	0	0	0	0	0	0	0.48	0	0	0	0	0
Heliotropium amplexicaule Vahl	0	0.184874	0	0	0	0	0	0	0.6	0	0	0
Heliotropium curassavicum L.	0	0.243697	0	0.4	0	0	0	0	0	0	0	0
Heliotropium elongatum Hoffm. ex Roem. & Schult.	0	0.092437	0	0	0	0	0	0	0	0	0	0
Heliotropium lilloi (I.M.Johnst.) Luebert	0	0	0	0	0	0	0	0	0	0	0	0.291667
Heliotropium phylicoides Cham.	0	0	0	0	0	0	0.16	0	0	0	0	0
Heliotropium transalpinum Vell.	0	0	0	0	0	0	0.16	0	0	0	0	0
Hemionitis tomentosa (Lam.) Raddi	0	0	0	0	0	0	0.44	0	0	0	0	0
Hennecartia omphalandra J.Poiss.	0	0	0	0	0	0	0.32	0	0	0	0	0
Herreria bonplandii Lecomte	0	0	0	0	0	0	0.22	0	0	0	0	0
Herreria montevidensis Klotzsch ex Griseb.	0	0	0	0	0	0	0.22	0	0	0	0	0
Heteropterys dumetorum (Griseb.) Nied.	0	0.0756303	0	0	0	0	0	0	0	0	0	0
Heteropterys glabra Hook. & Arn.	0	0.0756303	0	0	0	0	0.22	0	0	0	0	0
Heteropterys intermedia (A.Juss.) Griseb.	0	0	0	0	0	0	0.16	0	0	0	0	0
Heterosperma tenuisectum (Griseb.) Cabrera	0	0.0756303	0	0	0	0	0	0	0	0	0	0
Heterostachys ritteriana (Moq.) Ung.-Sternb.	0	0	0	0	0.183333	0	0	0	0	0	0	0
Hieronymiella clidanthoides Pax	0	0	0	0	0	0	0	0	0	0.6	0	0
Hippeastrum glaucescens (Mart.) Herb.	0	0	0	0	0	0	0.22	0	0	0	0	0
Hochreutinera hasslerana (Hochr.) Krapov.	0	0.0756303	0	0	0	0	0	0	0	0	0	0
Hoffmannseggia erecta Phil.	0	0	0	0	0.183333	0	0	0	0	0	0	0
Holocalyx balansae Micheli	0	0	0	0	0	0	0.92	0	0	0	0	0
Hordeum pubiflorum Hook.f.	0	0	0	0	0	0	0	0.233333	0	0	0	0
Hyalis argentea D.Don ex Hook. & Arn.	0	0	0	0	0.633333	0	0	0	0	0	0	0
Hydrocleys nymphoides (Willd.) Buchenau	0	0.0756303	0	0	0	0	0	0	0	0	0	0
Hydrocotyle bonariensis Lam.	0	0.092437	0	0	0	0.333333	0.16	0	0	0	0	0
Hydrocotyle callicephala Cham.	0	0	0	0	0	0	0.16	0	0	0	0	0
Hydrocotyle exigua (Urb.) Malme	0	0	0	0	0	0	0.32	0	0	0	0	0
Hydrocotyle leucocephala Cham. & Schltdl.	0	0	0	0	0	0	0.22	0	0	0	0	0
Hydrocotyle ranunculoides L.f.	0	0.151261	0	0	0	0	0	0	0	0	0	0
Hydrolea sp.	0	0	0	0	0	0	0.16	0	0	0	0	0
Hymenoxys anthemoides (Juss.) Cass.	0	0.0756303	0	0	0	0	0	0	0	0	0	0
Hypericum brasiliense Choisy	0	0.0756303	0	0	0	0	0.26	0	0	0	0	0
Hypericum connatum Lam.	0	0.193277	0	0.6	0	0.333333	0.16	0	0	0	0	0
Hypochaeris chillensis (Kunth) Hieron.	0	0	0	0	0	0	0.56	0	0	0	0	0
Hypochaeris incana (Hook. & Arn.) Macloskie	0	0	0	0	0	0	0	0.233333	0	0	0	0
Hypochaeris meyeniana (Walp.) Benth. & Hook.f. ex Griseb	0	0	0	0	0	0	0	0	0	0.7	0	0
Hypochaeris microcephala (Sch.Bip.) Cabrera	0	0	0	0	0	0	0.22	0	0	0	0	0
Hypochaeris pampasica Cabrera	0	0	0	0	0	0.333333	0	0	0	0	0	0
Hypolepis poeppigii (Kunze) R.Rodr.	0	0	0	0	0	0	0	0	0	0	0	0.708333
Hypseocharis pimpinellifolia J.Remy	0.666667	0	0	0	0	0	0	0	0	0	0	0
Hyptis lappacea Benth.	0	0.226891	0	0	0	0	0.16	0	0	0	0	0
Hysterionica glaucifolia (Kuntze) Solbrig	0	0	0	0	0.183333	0	0	0	0	0	0	0
Ibatia fiebrigii (Schltr.) Morillo	0	0.0756303	0	0	0	0	0	0	0	0	0	0
Ibicella parodii Abbiatti	0	0.0756303	0	0	0	0	0	0	0	0	0	0
Ilex dumosa Reissek	0	0	0	0	0	0	0.22	0	0	0	0	0
Ilex paraguariensis A.St.-Hil.	0	0.252101	0	0.4	0.633333	0	0.86	0.466667	0.7	0	0	1
Imperata brasiliensis Trin.	0	0	0	0	0	0	0.16	0	0	0	0	0
Imperata contracta (Kunth) Hitchc.	0	0.0756303	0	0	0	0	0	0	0	0	0	0
Indigofera suffruticosa Mill.	0	0.0756303	0	0	0	0	0.22	0	0	0	0	0
Inga affinis DC.	0	0	0	0	0	0	0.32	0	0	0	0	0
Inga marginata Willd.	0	0	0	0	0	0	0.22	0	0	0	0	0
Inga uraguensis Hook. & Arn.	0	0	0	0	0	0	0.28	0	0	0	0	0
Iochroma australe Griseb.	0.666667	0	0	0	0	0	0	0	0	0	0	0
Ipomoea bonariensis Hook.	0	0.0756303	0	0	0	0	0	0	0	0	0	0
Ipomoea cairica (L.) Sweet	0	0.0756303	0	0	0	0	0	0	0	0	0	0
Ipomoea carnea Jacq.	0	0.201681	0	0	0	0	0.32	0	0	0	0	0
Ipomoea cheirophylla O'Donell	0	0.0756303	0	0	0	0	0	0	0	0	0	0
Ipomoea hieronymi (Kuntze) O'Donell	0	0.0756303	0	0	0	0	0	0	0	0	0	0
Ipomoea indica (Burm.) Merr.	0	0	0	0	0	0	0.16	0	0	0	0	0
Ipomoea nil (L.) Roth	0	0	0	0	0	0	0.16	0	0	0	0	0
Ipomoea plummerae A.Gray	0	0	0	0	0	0	0	0	0	0.6	0	0
Ipomoea purpurea (L.) Roth	0	0.151261	0	0	0	0	0	0	0	0	0	0
Iresine diffusa Humb. & Bonpl. ex Willd.	0	0.092437	0	0	0	0	0.16	0	0	0	0	0.291667
Isabelia virginalis Barb.Rodr.	0	0	0	0	0	0	0.16	0	0	0	0	0
Isochilus linearis (Jacq.) R.Br.	0	0	0	0	0	0	0.16	0	0	0	0	0
Jaborosa integrifolia Lam.	0	0	0	0	0	0.333333	0	0	0	0	0	0
Jacaranda micrantha Cham.	0	0	0	0	0	0	0.44	0	0	0	0	0
Jacaranda mimosifolia D.Don	0	0.0756303	0	0	0	0	0	0	0	0	0	0.583333
Jacaranda puberula Cham.	0	0	0	0	0	0	0.16	0	0	0	0	0
Jacaratia corumbensis Kuntze	0	0.092437	0	0	0	0	0	0	0	0	0	0
Jacaratia spinosa (Aubl.) A.DC.	0	0	0	0	0	0	0.28	0	0	0	0	0
Janusia guaranitica (A.St.-Hil.) A.Juss.	0	0.109244	0	0	0	0	0	0	0	0	0	0
Jarava ichu Ruiz & Pav.	0.666667	0.0756303	0	0	0.183333	0	0	0	0	0	0	0
Jarava leptostachya (Griseb.) F.Rojas	0	0.0756303	0	0	0	0	0	0	0	0	0	0
Jarava neaei (Nees ex Steud.) Peñailillo	0	0	0	0	0.183333	0	0	0	0	0	0	0
Jatropha grossidentata Pax & K.Hoffm.	0	0.0756303	0	0	0	0	0	0	0	0	0	0
Jatropha hieronymi Kuntze	0	0.092437	0	0	0	0	0	0	0	0	0	0
Jatropha isabelliae Müll.Arg.	0	0.0756303	0	0	0	0	0	0	0	0	0	0
Jatropha macrocarpa Griseb.	0	0.0756303	0	0	0	0	0	0	0	0	0	0
Jodina rhombifolia (Hook. & Arn.) Reissek	0	0.697479	0	0.4	0	0.433333	0	0	0	0	0	0
Juglans australis Griseb.	0	0.226891	0	0	0	0	0	0	0	0	0	0.875
Juncus aff. balticus Willd.	0	0	0	0	0	0	0	0.233333	0	0	0	0
Juncus balticus Willd.	0	0	0	0	0	0	0	0.233333	0	0	0	0
Juncus dichotomus Elliot	0	0	0	0	0	0.333333	0	0	0	0	0	0
Junellia hookeriana (Covas & Schnack) N.O'Leary & P.Peralta	0	0.0756303	0	0	0	0	0	0	0	0	0	0
Junellia seriphioides (Gillies & Hook. ex Hook.) Moldenke	0	0	0	0	0.366667	0	0	0	0	0	0	0
Jungia polita Griseb.	0	0.252101	0	0.4	0	0	0	0	0	0	0	0.291667
Justicia brasiliana Roth	0	0	0	0	0	0	0.16	0	0	0	0	0
Justicia comata (L.) Lam.	0	0.0756303	0	0	0	0	0.16	0	0	0	0	0
Justicia squarrosa Griseb.	0	0.0756303	0	0	0	0	0	0	0	0	0	0
Justicia tweediana (Nees) Griseb.	0	0.0756303	0	0	0	0	0	0	0.6	0	0	0
Justicia xylosteoides Griseb.	0	0	0	0	0	0	0	0	0.6	0	0	0
Kageneckia lanceolata Ruiz & Pav.	0	0.151261	0	0	0	0	0	0	0	0	0	0
Kallstroemia tucumanensis Descole, O'Donell & Lourteig	0	0.0756303	0	0	0	0	0	0	0	0	0	0
Krameria lappacea (Dombey) Burdet & B.B.Simpson	0	0	0	0	0	0	0	0	0	0.6	0	0.416667
Lantana achyranthifolia Desf.	0	0.0756303	0	0	0	0	0	0	0	0	0	0
Lantana aff. camara L.	0	0	0	0	0	0	0	0	0.6	0	0	0
Lantana balansae Briq.	0	0.092437	0	0	0	0	0.16	0	0	0	0	0
Lantana camara L.	0	0	0	0	0	0.433333	0.22	0.233333	0	0	0	0
Lantana fucata Lindl.	0	0.0756303	0	0	0	0	0	0	0	0	0	0
Lantana grisebachii Stuck. ex Seckt	0	0.0756303	0	0	0	0	0	0	0	0	0	0
Lantana megapotamica (Spreng.) Tronc.	0	0.0756303	0	0	0	0	0	0	0	0	0	0
Lantana montevidensis (Spreng.) Briq.	0	0.0756303	0	0	0	0	0.32	0	0	0	0	0
Larrea ameghinoi Speg.	0	0	0	0	0	0	0	0.233333	0	0	0	0
Larrea cuneifolia Cav.	0	0.268908	0	0	0.55	0	0	0	0.7	0	0	0
Larrea divaricata Cav.	0	0.453782	0	0.6	0.65	0	0	0.233333	0.7	0	0	0
Larrea nitida Cav.	0	0	1	0	0.266667	0	0	0.3	0	0	0	0
Lathyrus magellanicus Lam.	0	0	0.4	0	0	0	0	0	0	0	0.32	0
Lecanophora ameghinoi (Speg.) Speg.	0	0	0	0	0	0	0	0.233333	0	0	0	0
Lemna gibba L.	0	0.092437	0	0	0	0	0	0	0	0	0	0
Lepechinia floribunda (Benth.) Epling	0	0.092437	0	0	0	0	0	0	0	0	0	0.291667
Lepechinia meyenii (Walp.) Epling	0.666667	0	0	0	0	0	0	0	0	0	0	0
Lepechinia vesiculosa (Benth.) Epling	0	0	0	0	0	0.333333	0	0	0	0	0	0.291667
Lepidaploa balansae (Hieron.) H.Rob.	0	0	0	0	0	0	0.16	0	0	0	0	0
Lepidium auriculatum Regel & Körn.	0	0.0756303	0	0	0	0.333333	0	0	0	0	0	0
Lepidium bonariense L.	0	0.092437	0	0	0	0.333333	0	0	0	0	0	0
Lepidium didymum L.	0	0.268908	0	0.4	0	0.433333	0.38	0	0.9	0	0	0.416667
Lepidium meyenii Walp.	0	0.0756303	0	0.6	0	0	0	0	0	0	0	0.291667
Lepidophyllum cupressiforme (Lam.) Cass.	0	0	0	0	0	0	0	0.233333	0	0	0	0
Leptochloa crinita (Lag.) P.M.Peterson & N.W.Snow	0	0.092437	0	0	0.183333	0	0	0	0	0	0	0
Leptochloa fusca (L.) Kunth	0	0.0756303	0	0	0	0	0	0	0	0	0	0
Leptochloa pluriflora (E.Fourn.) P.M. eterson & N.W.Snow	0	0.092437	0	0	0	0	0	0	0	0	0	0
Leptochloa virgata (L.) P.Beauv.	0	0.0756303	0	0	0	0	0	0	0	0	0	0
Leptospron adenanthum (G.Mey.) A.Delgado	0	0.0756303	0	0	0	0	0	0	0	0	0	0
Lessingianthus glabratus (Less.) H.Rob.	0	0	0	0	0	0	0.16	0	0	0	0	0
Lessingianthus mollissimus (D.Don ex Hook. & Arn.) H.Rob.	0	0.0756303	0	0	0	0	0	0	0	0	0	0
Libertia chilensis (Molina) Gunckel	0	0	0	0	0	0	0	0	0	0	0.32	0
Libidibia paraguariensis (D.Parodi) G.P.Lewis	0	0.588235	0	0	0	0	0.32	0	0	0	0	0
Ligaria cuneifolia (Ruiz & Pav.) Tiegh.	0	0.361345	0	0.4	0.266667	0	0	0	0.8	0	0	0.291667
Limnobium laevigatum (Humb. & Bonpl. ex Willd.) Heine	0	0.151261	0	0	0	0	0	0	0	0	0	0
Limonium brasiliense (Boiss.) Kuntze	0	0	0	0.4	0	0	0	0.3	0	0	0	0
Lippia alba (Mill.) N.E.Br. ex Britton & P.Wilson	0	0.142857	0	0.4	0	0.333333	0.22	0	0	0	0	0.291667
Lippia brasiliensis (Link) T.Silva	0	0	0	0	0	0	0.16	0	0	0	0	0
Lippia integrifolia (Griseb.) Hieron.	0	0.369748	0	0.6	0	0	0	0	0.7	0	0	0
Lippia junelliana (Moldenke) Tronc.	0	0.168067	0	0	0	0	0	0	0	0	0	0
Lippia lippioides (Cham.) Rusby	0	0	0	0	0	0	0.22	0	0	0	0	0
Lippia lupulina Cham.	0	0	0	0	0	0	0.16	0	0	0	0	0
Lippia turbinata Griseb.	0	0.504202	0	0.8	0.45	0.533333	0	0	0.7	0	0	0
Lippia turnerifolia Cham.	0.666667	0	0	0	0	0	0	0	0	0	0	0
Lithraea molleoides (Vell.) Engl.	0	0.621849	0	0.4	0.183333	0	0	0	0	0	0	0
Lobelia hassleri Zahlbr.	0	0	0	0	0	0	0.16	0	0	0	0	0
Lomatia hirsuta (Lam.) Diels	0	0	0	0	0	0	0	0.6	0	0	0.56	0
Lonchocarpus nitidus (Vogel) Benth.	0	0	0	0	0	0	0.16	0	0	0	0	0
Lophocarpinia aculeatifolia (Burkart) Burkart	0	0.0756303	0	0	0	0	0	0	0	0	0	0
Lophophytum leandri Eichler	0	0	0	0.4	0	0	0.28	0	0	0	0	0
Louisiella elephantipes (Nees ex Trin.) Zuloaga	0	0.0756303	0	0	0	0	0	0	0	0	0	0
Ludwigia bonariensis (Micheli) H.Hara	0	0.0756303	0	0	0	0	0	0	0	0	0	0
Ludwigia elegans (Cambess.) H.Hara	0	0	0	0	0	0	0.16	0	0	0	0	0
Ludwigia octovalvis (Jacq.) P.H.Raven	0	0.0756303	0	0	0	0	0	0	0	0	0	0
Ludwigia peploides (Kunth) P.H.Raven	0	0.168067	0	0	0	0	0.16	0	0	0	0	0
Luehea divaricata Mart.	0	0	0	0	0	0	0.38	0	0	0	0	0
Luma apiculata (DC.) Burret	0	0	0.4	0	0	0	0	0.233333	0	0	0.64	0
Luzula brachyphylla Phil.	0	0	0	0	0	0	0	0.233333	0	0	0	0
Lycianthes asarifolia (Kunth & Bouché) Bitter	0	0.0756303	0	0	0	0	0	0	0	0	0	0
Lycianthes lycioides (L.) Hassl.	0.666667	0	0	0	0	0	0	0	0	0	0	0
Lycium ameghinoi Speg.✤	0	0	0.4	0	0	0	0	0.233333	0	0	0	0
Lycium americanum Jacq.	0	0.243697	0	0	0	0	0	0	0	0	0	0
Lycium boerhaviaefolium L.f.	0	0.168067	0	0	0	0	0.32	0	0	0	0	0
Lycium cestroides Schltdl.	0	0.378151	0	0	0	0	0	0	0	0	0	0.291667
Lycium chanar Phil.	0	0	0	0	0	0	0	0	0	0.6	0	0
Lycium chilense Miers ex Bertero	0	0	0.4	0	0.633333	0	0	0.233333	0	0	0	0
Lycium ciliatum Schltdl.	0	0.184874	0	0	0	0	0	0	0	0	0	0
Lycium cuneatum Dammer	0	0.0756303	0	0	0	0	0	0	0	0	0	0
Lycium elongatum Miers	0	0.151261	0	0	0	0	0	0	0	0	0	0
Lycium gilliesianum Miers	0	0	0.4	0	0.266667	0	0	0	0	0	0	0
Lycium nodosum Miers	0	0.151261	0	0	0	0	0	0	0	0	0	0
Lycopodium clavatum L.	0	0.0756303	0	0	0	0	0	0	0	0	0	0
Machaerium paraguariense Hassl.	0	0	0	0	0	0	0.26	0	0	0	0	0
Machaerium stipitatum (DC.) Vogel	0	0	0	0	0	0	0.26	0	0	0	0	0
Maclura tinctoria (L.) Steud.	0	0.336134	0	0	0	0	0.82	0	0	0	0	0
Macropharynx peltata (Vell.) J.F.Morales, M.E.Endress & Liede	0	0	0	0	0	0	0.32	0	0	0	0	0
Macropsychanthus violaceus (Mart. ex Benth.) L.P.Queiroz & Snak	0	0	0	0	0	0	0.26	0	0	0	0	0
Macroptilium bracteatum (Nees & C.Mart.) Maréchal & Baudet	0	0.0756303	0	0	0	0	0	0	0	0	0	0
Macroptilium panduratum (C.Mart. ex Benth.) Maréchal & Baudet	0	0.151261	0	0	0	0	0	0	0	0	0	0
Macroscepis grandiflora (Mart.) H.A.Keller & Liede	0	0.0756303	0	0	0	0	0.22	0	0	0	0	0
Macroscepis schreiteri (Descole & T.Mey.) H.A.Keller & Liede	0	0.151261	0	0	0	0	0	0	0	0	0	0
Maihuenia patagonica (Phil.) Britton & Rose	0	0	0	0	0	0	0	0.466667	0	0	0	0
Maihueniopsis darwinii (Hensl.) F.Ritter	0	0	0.6	0	0	0	0	0.6	0	0	0	0
Malaxis parthoni C.Morren	0	0	0	0	0	0	0.16	0	0	0	0	0
Malvastrum coromandelianum (L.) Garcke	0	0.277311	0	0	0	0	0.32	0	0	0	0	0
Mandevilla angustifolia (Malme) Woodson	0	0.0756303	0	0	0	0	0	0	0	0	0	0
Manettia luteo-rubra (Vell.) Benth.	0	0	0	0	0	0	0.16	0	0	0	0	0
Manihot grahamii Hook.	0	0.0756303	0	0	0	0	0.32	0	0	0	0	0
Manihot guaranitica Chodat & Hassl.	0	0.226891	0	0	0	0	0	0	0	0	0	0
Mansoa difficilis (Cham.) Bureau & K.Schum.	0	0	0	0	0	0	0.16	0	0	0	0	0
Maranta sobolifera L.Andersson	0	0	0	0	0	0	0.48	0	0	0	0	0
Margyricarpus pinnatus (Lam.) Kuntze	0	0.218487	0	0.4	0.183333	0.666667	0	0.433333	0	0	0.32	0
Marsilea sp.	0	0.0756303	0	0	0	0	0	0	0	0	0	0
Marsippospermum grandiflorum (L.f.) Hook.f.	0	0	0	0	0	0	0	0.233333	0	0	0	0
Mascagnia brevifolia Griseb.	0	0.226891	0	0	0	0	0	0	0	0	0	0
Matayba elaeagnoides Radlk.	0	0	0	0	0	0	0.22	0	0	0	0	0
Maxillaria spegazziniana Kraenzl.	0	0	0	0	0	0	0.16	0	0	0	0	0
Maxillaria vitelliniflora Barb.Rodr.	0	0	0	0	0	0	0.16	0	0	0	0	0
Maytenus boaria Molina	0.666667	0.092437	0.4	0	0	0	0	0.833333	0	0	0.76	0
Maytenus chubutensis (Speg.) Lourteig, O'Donell & Sleumer	0	0	0	0	0	0	0	0	0	0	0.32	0
Maytenus verticillata (Ruiz & Pav.) DC.	0	0	0	0	0	0	0	0	0	0	0	0.291667
Maytenus viscifolia Griseb.	0	0	0	0	0	0	0	0	0.7	0	0	0
Maytenus vitis-idaea Griseb.	0	0.428571	0	0	0	0	0	0	0	0	0	0
Melica macra Nees	0	0	0	0	0	0.333333	0	0	0	0	0	0
Melicoccus lepidopetalus Radlk.	0	0	0	0	0	0	0.16	0	0	0	0	0
Melochia pilosa (Mill.) Fawc. & Rendle	0	0	0	0	0	0	0.16	0	0	0	0	0
Melothria cucumis Vell.	0	0	0	0	0	0	0.38	0	0	0	0	0
Melothria warmingii Cogn.	0	0	0	0	0	0	0.22	0	0	0	0	0
Menodora integrifolia (Cham. & Schltdl.) Steud.	0	0.0756303	0	0	0	0	0	0	0	0	0	0
Merostachys claussenii Munro	0	0	0	0	0	0	0.98	0	0	0	0	0
Microgramma squamulosa (Kaulf.) de la Sota	0.666667	0	0	0	0	0	0.16	0	0	0	0	0.416667
Microgramma vacciniifolia (Langsd. & Fisch.) Copel.	0	0.109244	0	0	0	0	0.22	0	0	0	0	0
Mikania cordifolia (L.f.) Willd.	0	0.0756303	0	0	0	0	0	0	0	0	0	0
Mikania glomerata Spreng.	0	0	0	0	0	0	0.16	0	0	0	0	0
Mikania lindleyana DC.	0	0	0	0	0	0	0.16	0	0	0	0	0
Mikania micrantha Kunth	0	0	0	0	0	0	0.16	0	0	0	0	0
Mikania periplocifolia Hook. & Arn.	0	0.092437	0	0	0	0	0	0	0.6	0	0	0
Miltonia flavescens Lindl.	0	0	0	0	0	0	0.32	0	0	0	0	0
Mimosa debilis Humb. & Bonpl. ex Willd.	0	0	0	0	0	0	0	0	0	0	0	0.291667
Mimosa detinens Benth.	0	0.285714	0	0	0	0	0	0	0	0	0	0
Mimosa farinosa Griseb.	0	0.151261	0	0	0.183333	0	0	0	0	0	0	0
Mimosa polycarpa Kunth	0	0	0	0	0	0	0	0	0	0	0	0.291667
Mimosa strigillosa Torr. & A.Gray	0	0.0756303	0	0	0	0	0	0	0	0	0	0
Mimozyganthus carinatus (Griseb.) Burkart	0	0.243697	0	0	0	0	0	0	0	0	0	0
Minthostachys verticillata (Griseb.) Epling✤	0	0.420168	0	1	0	0.333333	0	0	0	0	0	0.291667
Mitracarpus megapotamicus (Spreng.) Kuntze	0	0.092437	0	0	0	0	0	0	0	0	0	0
Mitraria coccinea Cav.	0	0	0	0	0	0	0	0	0	0	0.32	0
Modiola caroliniana (L.) G.Don	0	0.0756303	0	0	0	0.433333	0	0	0	0	0	0
Modiolastrum malvifolium (Griseb.) K.Schum.	0	0	0	0	0	0	0.22	0	0	0	0	0
Monnina dictyocarpa Griseb.	0	0.0756303	0	0	0.266667	0	0	0	0	0	0	0
Monteverdia ilicifolia (Mart. ex Reissek) Biral	0	0.109244	0	0.4	0	0.333333	0.7	0	0	0	0	0
Monteverdia spinosa (Griseb.) Biral	0	0.369748	0	0	0	0	0	0	0	0	0	0
Monttea aphylla (Miers) Benth. & Hook.	0	0	0.4	0	0.45	0	0	0.233333	0	0	0	0
Monvillea cavendischii (Monv.) Britton & Rose	0	0.151261	0	0	0	0	0	0	0	0	0	0
Monvillea spegazzinii (F.A.C.Weber) Britton & Rose	0	0.319328	0	0	0	0	0	0	0	0	0	0
Moquiniastrum argentinum (Cabrera) G.Sancho	0	0.151261	0	0	0	0	0	0	0	0	0	0
Muehlenbeckia hastulata (Sm.) I.M.Johnst.	0	0	0.6	0	0.183333	0	0	0.4	0	0	0	0
Muehlenbeckia sagittifolia (Ortega) Meisn.	0	0.0756303	0	0	0	0.766667	0.22	0	0	0	0	0
Muehlenbeckia tamnifolia (Kunth) Meisn.	0	0	0	0	0	0	0	0	0	0	0	0.291667
Muellera campestris (Mart. ex Benth.) M.J.Silva & A.M.G.Azevedo	0	0	0	0	0	0	0.6	0	0	0	0	0
Muhlenbergia alopecuroides (Griseb.) P.M.Peterson & Columbus	0.666667	0	0	0	0	0	0	0	0	0	0	0
Muhlenbergia ciliata (Kunth) Trin.	0.666667	0	0	0	0	0	0	0	0	0	0	0
Mulguraea aspera (Gillies & Hook. ex Hook.) N.O'Leary & P.Peralta	0.666667	0	0	0	0.266667	0	0	0	0	0	0	0
Mulguraea tridens (Lag.) N.O'Leary & P.Peralta	0	0	0	0	0	0	0	0.4	0	0	0	0
Mutisia decurrens Cav.	0	0	0	0	0	0	0	0	0	0	0.32	0
Mutisia friesiana Cabrera	0	0	0	0	0	0	0	0	0.6	0	0	0
Mutisia ledifolia Decne. ex Wedd.	0.666667	0	0	0	0	0	0	0	0	0	0	0
Mutisia oligodon Poepp. & Endl.	0	0	0	0	0	0	0	0.233333	0	0	0	0
Mutisia retrorsa Cav.	0	0	0	0	0	0	0	0.233333	0	0	0	0
Myoschilos oblongum Ruiz & Pav.	0.666667	0	0	0	0	0	0	0	0	0	0	0
Myracrodruon balansae (Engl.) Santin	0	0	0	0	0	0	0.22	0	0	0	0	0
Myrceugenia euosma (O.Berg) D.Legrand	0	0	0	0	0	0	0.22	0	0	0	0	0
Myrcia anomala Cambess.	0	0	0	0	0	0	0.22	0	0	0	0	0
Myrcia cruciflora A.R.Lourenço & E.Lucas	0	0	0	0	0	0	0.16	0	0	0	0	0
Myrcia oblongata DC.	0	0	0	0	0	0	0.22	0	0	0	0	0
Myrcia palustris DC.	0	0	0	0	0	0	0.32	0	0	0	0	0
Myrcia selloi (Spreng.) N.Silveira	0	0	0	0	0	0	0.16	0	0	0	0	0
Myrcianthes cisplatensis (Cambess.) O.Berg	0	0.243697	0	0	0	0	0	0	0	0	0	0
Myrcianthes mato (Griseb.) McVaugh	0	0	0	0	0	0	0	0	0	0	0	0.291667
Myrcianthes pungens (O.Berg) D.Legrand	0	0.151261	0	0	0	0	0.5	0	0	0	0	0.291667
Myrciaria delicatula (DC.) O.Berg	0	0	0	0	0	0	0.32	0	0	0	0	0
Myriopteris myriophylla (Desv.) J.Sm.	0	0	0	0.4	0.266667	0	0	0	0	0	0	0
Myriopteris notholaenoides (Desv.) Grusz & Windham	0	0.134454	0	0	0	0	0	0	0	0	0	0
Myriopus paniculatus (Cham.) Feuillet	0	0	0	0	0	0	0	0	0	0	0	0.291667
Myriopus salzmannii (DC.) Diane & Hilger	0	0.0756303	0	0	0	0	0.16	0	0	0	0	0
Myrocarpus frondosus Allemão	0	0	0	0	0	0	0.84	0	0	0	0	0
Myroxylon peruiferum L.f.	0	0	0	0	0	0	0	0	0	0	0	0.416667
Myrsine balansae (Mez) Otegui	0	0	0	0	0	0	0.22	0	0	0	0	0
Myrsine coriacea (Sw.) R.Br.	0	0	0	0	0	0	0.16	0	0	0	0	0.291667
Myrsine laetevirens (Mez) Arechav.	0	0	0	0	0	0	0.16	0	0	0	0	0
Nama undulatum Kunth	0	0.243697	0	0	0	0	0	0	0	0	0	0
Nardophyllum bryoides (Lam.) Cabrera	0	0	0	0	0	0	0	0.533333	0	0	0	0
Nassauvia axillaris (Lag. ex Lindl.) D.Don	0	0	0.4	0	0.183333	0	0	0.6	0	0	0	0
Nassauvia glomerulosa (Lag. ex Lindl.) D.Don	0	0	0	0	0	0	0	0.233333	0	0	0	0
Nassella catamarcensis Torres	0	0.0756303	0	0	0	0	0	0	0	0	0	0
Nassella hyalina (Nees) Barkworth	0	0.0756303	0	0	0	0	0	0	0	0	0	0
Nassella tenuis (Phil.) Barkworth	0	0	0	0	0.266667	0	0	0	0	0	0	0
Nectandra angustifolia (Schrad.) Nees & Mart.	0	0	0	0	0	0	0.7	0	0	0	0	0
Neltuma × vinalillo (Stuck.) C.E.Hughes & G.P.Lewis	0	0.151261	0	0	0	0	0	0	0	0	0	0
Neltuma aff. nigra (Griseb.) C.E.Hughes & G.P.Lewis	0	0.0756303	0	0	0	0	0	0	0	0	0	0
Neltuma affinis (Spreng.) C.E.Hughes & G.P.Lewis	0	0.151261	0	0	0	0	0.26	0	0	0	0	0
Neltuma alba (Griseb.) C.E.Hughes & G.P.Lewis	0	0.831933	0	0.6	0	0	0.32	0	0.8	0	0	0
Neltuma alpataco (Phil.) C.E.Hughes & G.P.Lewis	0	0	0	0	0.183333	0	0	0.466667	0	0	0	0
Neltuma caldenia (Burkart) C.E.Hughes & G.P.Lewis✤	0	0	0	0	0.183333	0	0	0	0	0	0	0
Neltuma chilensis (Molina) C.E.Hughes & G.P.Lewis	0	0.428571	0	0.4	0.283333	0	0	0	0	0	0	0
[truncated: 717 more rows]
